# Supplementary material for: Flexible motor sequence generation during stereotyped escape responses
Source: eLife journal article supplement (doi:10.7554/elife.56942), 2020-06-05

**A** RIV::GCaMP6 (spontaneous moving)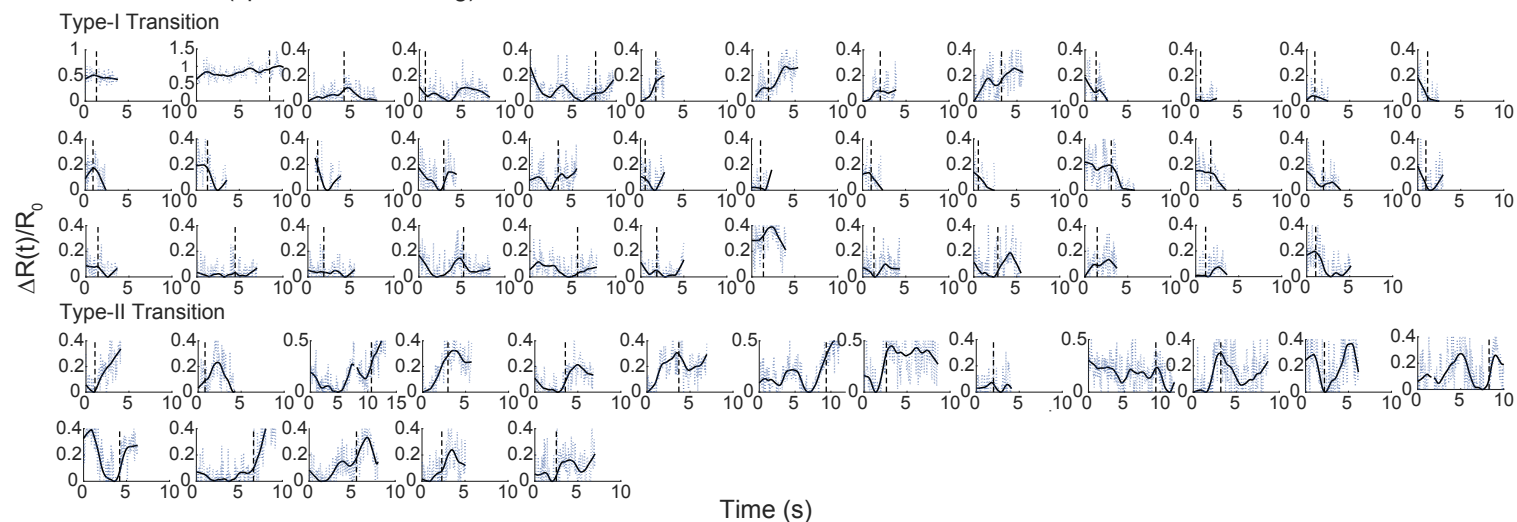**B**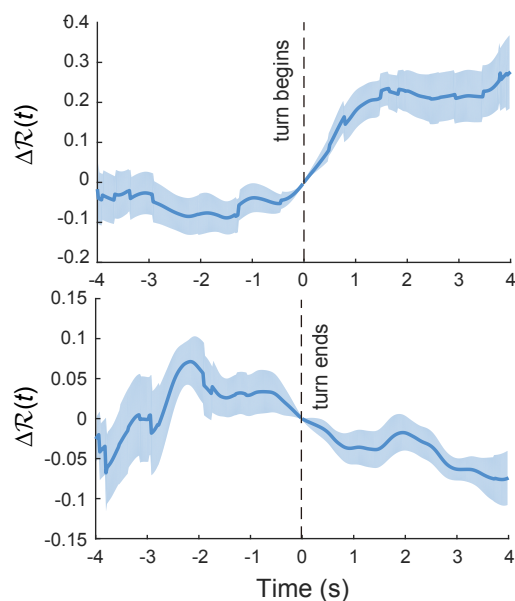**C** AIB::Chrimson; RIV::GCaMP6 (immobilized)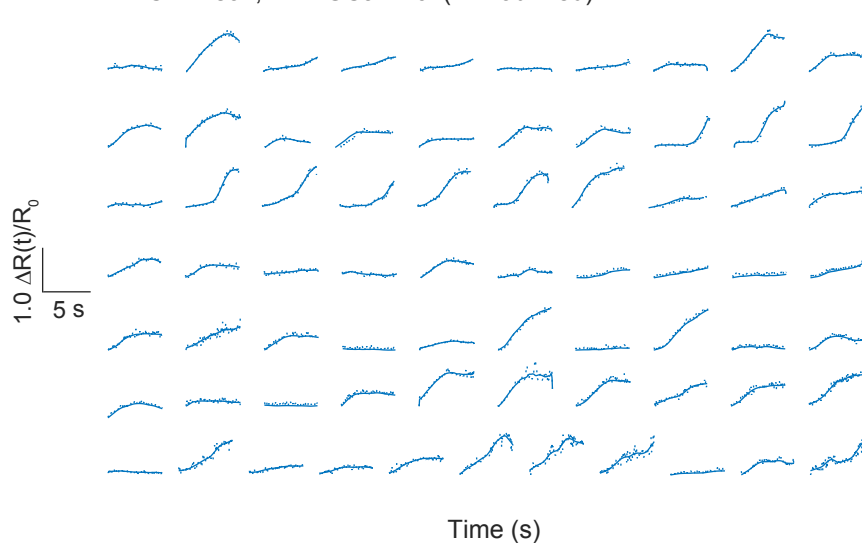**D** *inx-1 unc-7 unc-9*; AIB::Chrimson; RIV::GCaMP6 (immobilized)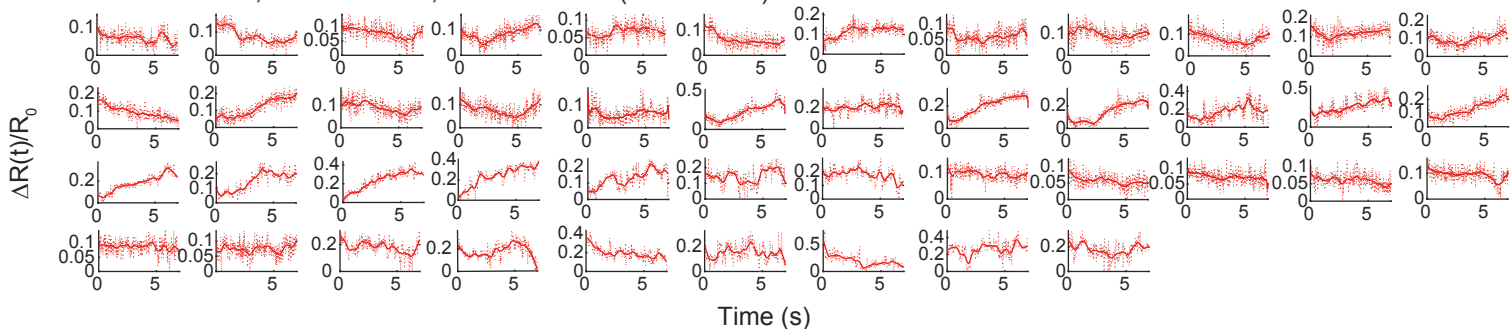**E** AIB::Chrimson; RIV::Arch; RIV::GCaMP6 (immobilized)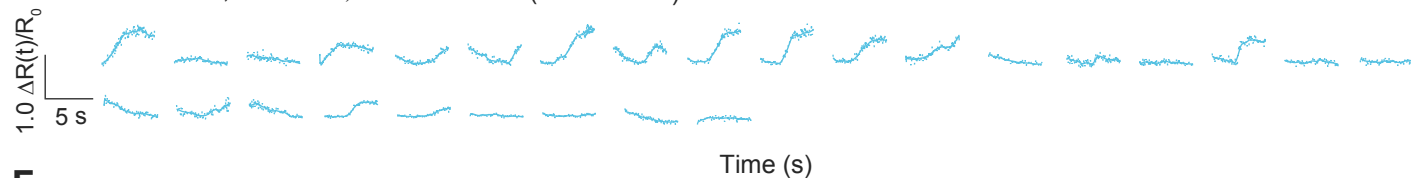**F** AIB::Chrimson; RIV::GCaMP6 (freely moving)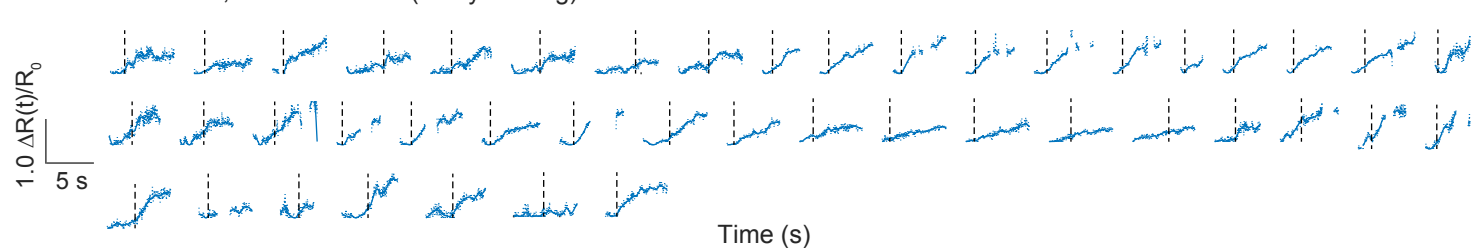

Supplement: supp [file elife-56942-supp-v1.zip]
