# Supplementary material for: Flexible motor sequence generation during stereotyped escape responses
Source: eLife journal article supplement (doi:10.7554/elife.56942), 2020-06-05
Supplement: supp [file elife-56942-supp-v1.zip]

## Sheet: Summary
Raw data for Figure 2 - figure supplement 1D
worm name	reversal without turn rate	reversal with turn rate	SD	n	a	error range	lower confidence limit	upper confidence limit		reversal without turn num	reversal num	E/F
QW1097ctrl	0.471544	0.528455	0.49919	123	0.05	0.0882188	0.440236	0.616674
1s	0.584158	0.415842	0.492866	101	0.05	0.0961206	0.319721	0.511962		59	101	0.584158
2s	0.478723	0.521277	0.499547	94	0.05	0.100986	0.420291	0.622262		45	94	0.478723
3s	0.378049	0.621951	0.4849	82	0.05	0.104953	0.516999	0.726904		31	82	0.378049
5s	0.285714	0.714286	0.451754	60	0.05	0.114307	0.599978	0.828593		18	63	0.285714
7s	0.235955	0.764045	0.424594	89	0.05	0.0882119	0.675833	0.852257		21	89	0.235955
12s	0.181818	0.818182	0.385695	75	0.05	0.0872893	0.730893	0.905471		14	77	0.181818
18s	0.1	0.9	0.3	50	0.05	0.0831542	0.816846	0.983154		5	50	0.1
p-value x2-test
worm name	reversal with turn	reversal without turn	n	p	multi p	lable
QW1097ctrl	65	58	123
1s	42	59	101	0.0931573	0.652101	ns
2s	49	45	94	0.916427	6.41499	ns	p<0.05 *
3s	51	31	82	0.185789	1.30053	ns	p<0.01 **
5s	43	18	61	0.0221054	0.154738	ns	p<0.001 ***
7s	68	21	89	0.000462952	0.00324066	**	p<0.0001 ****
12s	61	14	75	5.29406e-05	0.000370584	***
18s	45	5	50	9.44936e-06	6.61455e-05	****
sum

## Sheet: AIB_ChR2_control
Raw data for Figure 2 - figure supplement 1D
worm name	spontaneous reversal frame	turn or not		with ATR
20191023w1	707	0		no DLP on
	1000	0		recording
	1300	1		some worms always turn_delete
	1735	1		choose normal part(long foraward and rarely reversal)
	2326	1
	2809	1
	3200	0
	3800	0
	4455	1
w3	159	0
	397	1
	844	0
	1040	1
	1769	0
	2002	1
	2748	1
w4	230	0
	950	0
	1478	1
	2087	1
	2362	1
	2760	0
	3054	1
	3720	1
	4861	0
	5802	1
	6377	1
	6984	1
	7385	1
	8263	0
	9851	0
w5	6493	1
	7881	0
	8370	0
	8708	0
	9200	1
	10500	1
	10950	1
	12066	0
	12346	1
w6	400	1
	840	1
	1470	0
	1800	1
	2600	1
	2840	0
	3274	1
	7634	1
	8863	1
	9400	1
	11528	0
	11957	0
	13176	1
w7	170	0
	663	0
	786	1
	1495	1
	1788	0
	2231	1
	6936	0
	7703	1
	8246	0
	11012	1
	15282	1
w8	92	0
	372	1
20191031w1	147	0
	1455	0
	6130	0
	7460	0
	7836	1
	8664	1
	10223	1
	12736	0
	13710	0
	14179	1
	15940	1
	16782	1
	20359	0
	23227	0
	25124	0
	25935	0
w3	723	0
	1023	1
	1939	1
	2538	0
	3244	1
	4091	1
	5568	1
	8199	0
	8851	1
	10385	1
	15498	0
	16732	0
	18037	1
	19624	0
	19941	1
	21916	0
	23254	1
w4	627	0
	984	0
	1338	0
	1781	0
	2283	1
	2811	0
	3443	0
	3739	0
	5100	1
	6100	1
	6730	1
	7863	1
	8933	1
	10155	1
	10665	0
	11231	1
	11768	1
	12475	0
	14420	0
	14900	1
	17178	0
	17926	0
	18378	0
	18910	0

## Sheet: 1s
worm name	reversal with omega turn	reversal without omega turn	omega turn following dlp off	turn but not change direction	turn	turn before dlp off	reversal length(s)	reversal length(frame)	reversal start(frame)	reversal end(frame)	dlp off time	experimental condition
20151217w1		0			0			92	1416	1508	1480	floor illumination
		1			1			349	2762	3111	2865
		0	1		1			279	4445	4724	4522
		0	1		0			83	5833	5916	5886
		1			0			183	7031	7214	7155
		1			0			134	8216	8350	8270
		1			0			145	9258	9403	9312
		1			0			134	10390	10524	10442
		1			0			109	11723	11832	11774
		1			0			112	12907	13019	12963
		1			0			169	13985	14154	14040
		0	1		1			446	14977	15423	15036
		0	1		0			113	16101	16214	16159
		0	1		0			289	17106	17395	17220
		1			0			124	18287	18411	18334
		0	1		1			463	19156	19619	19381
		1			0			149	20673	20822	20726
		0	1		1			350	21660	22010	21718
		0	1		1			163	22676	22839	22768
		0	1		0			201	23803	24004	23865
		0	1		1			561	24722	25283	25025
		1			0
		1			0			242	26872	27114	26902
		1			0			205	28249	28454	28382
		1			0			89	29635	29724	29685
		1			0			77	30901	30978	30950
		1			0			91	32306	32397	32341
		1			0			85	33437	33522	33494
		0	1		1			566	34432	34998	34630
		0	1		1			236	36143	36379	36201
20151217w2		0	1		0			792	1054	1846	1144
		1			1			160	2363	2523	2392
		0	1		0			416	3667	4083	3721
		0	1		1			223	5894	6117	5959
		0	1		1			174	6979	7153	7031
		1			0			477	8509	8986	8560
		1			0			73	9740	9813	9789
		pause			0			6	10996	11002	11005
		1			0			212	12009	12221	1269
		1			0			449	13182	13631	13236
		1			0			159	14228	14387	14281
		1			0			69	15416	15485	15460
		0	1		0			639	16586	17225	16640
		1			0			41	18692	18733	18701
		0	1		0			644	21162	21806	21212
		1			0			40	23512	23552	23521
		1			1			304	25389	25693	25439
		0		1	1			262	26864	27126	26923
		0	1		0			212	28056	28268	28116
		1			0			388	29545	29933	29604
		1			0			88	31240	31328	31258
		1			0			172	32799	32971	32848
		1						67	34482	34549	34520
		1						42	36066	36108	36086
		1						40	37470	37510	37501
20151217w3		pause
		0	1					328	2740	3068
		1						87	4367	4454
		1						110	6274	6384
		0	1					224	7862	8086
		0	1					184	9338	9522
		0	1					116	10890	11006
		1						62	12560	12622
		1						79	13907	13986
		1						91	15254	15345
		1						127	16806	16933
		0	1					493	18523	19016
		0	1					566	20495	21061
		0	1					236	22165	22401
		1						40	23801	23841
20151217w4		1			0			37	500	537	523
		1			0			591	2013	2604	2058
		0	1		1			468	3325	3793	3374
		pause
		1			0			38	6357	6395	6381
		1			0			100	7907	8007	7951
		0	1		1			151	9334	9485	9353
		1			0			234	10623	10857	10654
20151027w9'		1						404	1918	2322
		0	1					101	3097	3198
		no response
		1						98	5011	5109
		1						176	6593	6769
			1					87	7951	8038
		0	1					230	9075	9305
		1						228	10650	10878
		1						95	11922	12017
		1						97	13058	13155
		0	1					407	14818	15225
		1						134	17624	17758
		0	1					564	19337	19901
		1						144	21062	21206
20151027w10'		0	1					174	1375	1549
		0	1					0
		0	1					118	4552	4670
		0	1					226	6380	6606
		0	1					125	7857	7982
		0	1					253	9693	9946
		0	1					130	11313	11443
		0	1					127	12991	13118
		0	1					109	14812	14921

## Sheet: 2s
worm name	reversal with omega turn	reversal without omega turn	omega turn following dlp off	turn but not change direction	turn	turn before dlp off	reversal length(s)	reversal length(frame)	reversal start(frame)	reversal end(frame)	dlp off time	experimental condition
20151217w5		1			0			215	2811	3026	2894	floor illumination
		1			0			241	4477	4718	4518
		0	1		1			232	6253	6485	6331
		0	1		0			452	7592	8044	7680
		0	1		1			166	8982	9148	9089
		1			0			157	10821	10978	10939
		0	1		1			201	12483	12684	12556
		1			0			118	13621	13739	13678
		1			0			164	15355	15519	15428
		pause						0
		1			0			36	18589	18625	18628
20151217w6		0	1		1			100	7486	7586	7574
		0	1		1			310	8911	9221	9014
		1			0			235	10184	10419	10313
		1			0			202	12153	12355	12205
		pause						0
		1			0			167	15269	15436	15332
		0	1		0			440	16968	17408	17081
		1			1			570	18431	19001	18541
		1			0			60	19868	19928	19906
		1			0			233	21408	21641	21514
		1			0			162	22844	23006	22903
		0	1		0			392	24294	24686	24358
		1			0			174	25980	26154	26009
		pause						0
		1			0			241	29646	29887	29711
		1			0			951	31270	32221	31318
		1			0			214	32962	33176	33073
20151217w7		0	1		1			1289	3235	4524	3338
		1			0			1327	5690	7017	6761
		1			0			190	8408	8598	8511
		1			0			227	10211	10438	10288
		1						399	11428	11827
		1
		0	1
		1						159	18433	18592
		1						872	20203	21075
		1						615	21738	22353
		1						354	23334	23688
20151027w6'		0	1					134	2685	2819
		0	1					249	5153	5402
		0	1					141	7437	7578
		0	1					263	9659	9922
		0	1					141	11855	11996
		0	1					226	14044	14270
		0	1					142	16534	16676
		0	1					100	18770	18870
		0	1					154	21127	21281
		1						121	23571	23692
		1						148	26018	26166
		0	1					252	28101	28353
		0	1					334	30301	30635
		0	1
20151027w7'		0	1					223	604	827
		1						117	2146	2263
		0	1					235	4606	4841
		0	1					384	6999	7383
		0	1					115	9287	9402
		0	1					110	10903	11013
		0	1					250	12985	13235
		1						227	14982	15209
		0	1					164	17480	17644
		0	1					391	19525	19916
20151027w8'		0	1					223	1560	1783
		1
		0	1					194	5431	5625
		0	1					136	7630	7766
		0	1					-22	9634	9612
		0	1					113	11488	11601
		1						86	13619	13705
		0	1					245	15820	16065
		0	1					155	18027	18182
		0	1					277	19821	20098
20160122w1		0	1					397	3677	4074
		1						594	5605	6199
		1						138	7216	7354
		0	1					464	8677	9141
		0	1					123	10099	10222
		1						179	11598	11777
		1						629	13065	13694
		0	1					147	15454	15601
		1						153	16980	17133
		1						531	18304	18835
		0	1					507	20158	20665
		0	1					237	21575	21812
20160122w2		0	1					0
		0	1					291	3456	3747
		1						218	5385	5603
		0	1					272	7334	7606
		1						128	9124	9252
		1						157	10827	10984
		0	1					168	12655	12823
		1						163	15608	15771
		0	1					287	17950	18237

## Sheet: 3s
worm name	reversal with omega turn	reversal without omega turn	omega turn following dlp off	turn but not change direction	turn	turn before dlp off	reversal length(s)	reversal length(frame)	reversal start(frame)	reversal end(frame)	dlp off time	experimental condition
20160122w3		0	1					288	802	1090		floor illumination
		0	1					536	3135	3671
	1	0						73	5641	5714
		1						216	8059	8275
		0	1					193	10311	10504
		0	1					189	12294	12483
		0	1					290	14416	14706
		1						227	16504	16731
		0	1					184	18499	18683
		0	1					343	20742	21085
		0		1				156	23258	23414
		0	1					232	25189	25421
		1						189	27258	27447
		0	1					255	29537	29792
		1						244	31457	31701
		1						421	33900	34321
		0	1					185	36535	36720
		1						162	38740	38902
20160122w4		0	1					420	449	869
		1						506	2152	2658
		0	1					199	4326	4525
		1						121	6559	6680
		1						212	8692	8904
		1						438	10779	11217
		0	1					325	12796	13121
		1						185	15035	15220
		0	1					416	17008	17424
		1						241	19141	19382
		1						175	21268	21443
20160122w5		1						310	1188	1498
		0	1					405	3095	3500
		1						340	6192	6532
		0	1					176	8190	8366
		1						301	11668	11969
		1						216	13688	13904
		1						194	15835	16029
		0	1					327	17839	18166
		0	1					199	19998	20197
		0	1					190	22026	22216
20160122w6		1						302	994	1296
		1						507	2913	3420
		0		1				379	5691	6070
		0		1				1053	7499	8552
		0	1					341	9273	9614
		0		1				254	11276	11530
		1						640	13038	13678
		0	1					257	15545	15802
		0		1				593	17997	18590
		1						161	20606	20767
20151027w2'		0	1					210	732	942
		0	1					345	3457	3802
		0	1					442	5675	6117
		1						133	9285	9418
		0	1					300	11362	11662
		0	1					192	13574	13766
		0	1					235	16597	16832
20151027w1'		0	1					555	3927	4482
		0	1					351	6057	6408
		1						193	8435	8628
		1						243	10505	10748
		1						186	12453	12639
		1						190	14228	14418
		1						236	15935	16171
		1						134	17725	17859
		0	1					155	19265	19420
	1	0						0
		0	1					243	23249	23492
20151027w3'		0	1					451	1784	2235
		0	1					214	3884	4098
		0	1					157	6128	6285
		0	1					363	8323	8686
		0	1					278	10607	10885
20151027w5'		0	1					237	3305	3542
		0			1			0
		0	1					364	7977	8341
		1						267	10303	10570
		0	1					249	12633	12882
		0	1					189	14868	15057
		0	1					197	16982	17179
		0	1					113	20059	20172
		1						121	22734	22855
		0	1					239	24843	25082

## Sheet: 5s
worm name	reversal with omega turn	reversal without omega turn	omega turn following dlp off	turn but not change direction	REVERSAL START	reversal END	reversal length(	reversal length		dlp off	dlp off time	experimental condition
20160122w7		0		1	1897	2282	385					floor illumination
		1			4432	5309	877
		1			7292	8425	1133
		0	1		9749	10155	406
		1			14108	14408	300
		1			16246	16557	311
20160122w8		0			1196	1351	155
		1			3435	3770	335
		1			5408	5791	383
		0	1		7726	8042	316
		0	1		9903	10352	449
		1			12241	12568	327
		0	1		14601	14913	312
		0	1		17301	17609	308
		0	1		18331	18743	412
20160122w10		0	1		1283	1584	301	4.49254		1547
	1	0
		1			5804	6326	522	7.79104		6127
		0	1		7997	8271	274	4.08955		8281	4.08955
		0	1		11808	12113	305	4.55224		12086
		1			14667	14696	29	0.432836		14945	0.432836
	1	0					0	0		17088	0
	1	0			18970	19200	230	3.43284		19261	3.43284
	1	0			19885	20046	161	2.40299		20175	2.40299
		1			24225	24670	445	6.64179		24516
	1	0			26515	26983	468	6.98507		26811
20160122w9		0	1
		0	1		2541	2683	142	2.1194		2855	2.1194
		0	1		4849	5011	162	2.41791		5157	2.41791
		0	1		7163	7413	250	3.73134		7466	3.73134
		1			9447	9777	330	4.92537		9771
		1			11616	11738	122	1.8209		11904	1.8209
		0	1		13424	13554	130	1.9403		13726	1.9403
		0	1		15471	15890	419	6.25373		15761	6.25373
		0	1		17940	18237	297	4.43284		18229
		0	1		20155	20516	361	5.38806		20454
	1	0			23116	23239	123	1.83582		23389	1.83582
	1	0			25275	25402	127	1.89552		25541	1.89552
		0	1		27648	28139	491
20160122w11		0	1		755	1203	448	6.68657		1051
		0	1
		0	1		4071	4550	479	7.14925		4375
		0		1	6121	6539	418	6.23881		6406
		0	1		8611	8979	368	5.49254		8901
		0	1		10769	11099	330
		1			13313	13454	141
		0	1		16267	16676	409
		1			18744	19097	353	5.26866		18983
		0	1		22054	22541	487	7.26866		22330
		1			24415	24770	355	5.29851		24708
	1	0
	1	0			28939	29240	301	4.49254		29212
		0	1		32959	33285	326	4.86567		33264
		0	1		35057	35467	410	6.1194		35352
		0	1
		0	1
		1
		0	1
		0	1
		0	1

## Sheet: 7s
worm name	reversal with omega turn	reversal without omega turn	omega turn following dlp off	turn but not change direction	reversal length(s)	reversal length(frame)	reversal start(frame)	reversal end(frame)	dlp off time	reversal length(turns occur in 7s)	experimental condition
20160122w12		0	1								floor illumination
		1			11.779	749	3526	4275	3961
		1			12.052	774	7171	7945	7611
		0	1		5.92	370	9613	9983	10026	5.92
		0	1		10.239	649	12135	12784	12581
	1	0			2.457	158	14689	14847	15071	2.457
	1	0			1.634	104	17426	17530	17679	1.634
		0	1		6.217	386	19932	20318	20325	6.217
	1	0			2.286	145	22219	22364	22595	2.286
		0	1		5.208	332	24733	25065	25096	5.208
		0	1		6.355	403	27011	27414	27449	6.355
	1	0			2.493	161	29393	29554	29738	2.493
		0	1		4.874	289	31896	32185	32130
	1	0			3.708	235	34207	34442	34637	3.708
		1			6.168	388	36705	37093	37093	6.168
20160122w13		0	1		7.054	448	509	957	918
		0	1		3.821	243	3074	3317	3475	3.821
		0	1		5.598	357	5578	5935	5983	5.598
		0	1		5.228	334	8431	8765	8774	5.228
		0	1		6.904	432	10717	11149	11145
		0	1		4.239	268	13476	13744	13783	4.239
		0	1		4.689	296	15627	15923	16013	4.689
	1	0			4.648	295	18400	18695	18806	4.648
	1	0			3.173	193	20800	20993	21161	3.173
		0	1		5.461	346	23231	23577	23599	5.461
		0	1		7.707	496	25892	26388	26315
20160122w14		0	1
		0	1		6.161	390	3600	3990	4004	6.161
		0	1		8.377	538	6512	7050	6935	8.377
		0	1		5.384	340	9415	9755	9836	5.384
		0	1		6.354	394	13131	13525	13526	6.354
	1	0			5.272	332	15420	15752	15839	5.272
	1	0			4.503	279	17659	17938	18057	4.503
		1			4.597	290	20289	20579	20691	4.597
		0	1		4.695	294	23065	23359	23423	4.695
		0	1		4.082	258	25570	25828	25998	4.082
		0	1		4.526	282	27958	28240	28367	4.526
		0	1		7.494	469	30541	31010	30899
		0	1		4.523	287	33070	33357	33507	4.523
20160122w15		0	1		7.279	457	1782	2239	2218	7.279
		0	1		4.235	265	4246	4511	4665	4.235
		0	1		6.363	395	7178	7573	7597	6.363
		1			2.917	183	10950	11133	11364	2.917
	1	0			2.912	177	13238	13415	13669	2.912
		0	1		7.267	451	16549	17000	16996
		0	1		5.289	319	19122	19441	19494	5.289
		0	1		3.916	241	21233	21474	21622	3.916
		1			2.786	169	25582	25751	25995	2.786
		0	1		5.609	338	28065	28403	28460	5.609
		0	1		6.36	399	30219	30618	30611
		0	1		2.385	144	33488	33632	33901	2.385
		0	1		4.279	267	35496	35763	35851	4.279
20160122w16	1	0			2.2	139	1495	1634	1847	2.2
		0	1		4.73	303	3780	4083	4212	4.73
		0	1
		0	1		7.585	493	8720	9213	9154
		0	1		9.766	633	12289	12922	12703
		0	1		5.485	348	15418	15766	15760
		0	1		3.866	245	20333	20578	20739	3.866
		0	1		6.58	417	24107	24524	24546	6.58
		0	1		7.629	484	25728	26212	26120
		1			0	0				0
		0	1		4.69	292	30670	30962	30994	4.69
20150914w2		1
		1
		1			6.601		5007	5334	5355	6.601
		1			8.317		7523	7935	7870
		1			6.943		9710	10054	10056	6.943
		1
		1
		1			8.903		16119	16560	16465
		1			2.887		18193	18336	18543	2.887
		1			7.064		20545	20895	20889
		0			3.713		22798	22982	23121	3.713
		0			7.064		24781	25131	25116	7.064
		0			6.662		26895	27225	27233	6.662
		0			8.356		28836	29250	29183
20150914W3		1			5.693		303	585	451
		1			6.036		2426	2725	2758	6.036
		1			6.238		4309	4618	4649	6.238
		1			6.057		6445	6745	6787	6.057
		0			6.196		8756	9063	9065	6.196
		0			5.853		9946	10236	10286	5.853
		0			6.117		12177	12480	12480	6.117
		0			4.52		14440	14664	14765	4.52
		0			2.947		16543	16689	16875	2.947
		0			4.056		18629	18830	18913	4.056
		0			1.898		20571	20665	20856	1.898
		0			5.793		22993	23280	23315	5.793

## Sheet: 12s
worm name	reversal with omega turn	reversal without omega turn	omega turn following dlp off	turn but not change direction	turn	reversal length(s)	reversal length(frame)	reversal start(frame)	reversal end(frame)	dlp off time	experimental condition
20160122w19	1	0			1		428	1369	1797	2022	floor illumination
		0		1	0		264	5537	5801	5722
	1	0			1		291	8787	9078	9286
		0	1		0		547	12431	12978	12914
	1	0			1		191	17075	17266	17763
		0	1		1		131	22239	22370	22347
	1	0			1		336	25455	25791	26038
		1			0		780	33170	33950	33818
20160122w20	1	0			1		396	1527	1923	2244
	1	0			1		604	5736	6340	6503
	1	0			1		162	9207	9369	9836
	1	0			0.5		164	12665	12829	13378
	1	0			1		482	16567	17049	17291
	1	0			1		178	21344	21522	21596
		0		1	0.5		429	24702	25131	25510
		0	1		0.5		264	28128	28392	29030
20160122w17		0	1		1		1002	5679	6681	6348
	1	0			0.5		671	10640	11311	11298
	1	0			1		627	14418	15045	15130
	1	0			1		817	18559	19376	19176
	1	0			0		672	23455	24127	23858
		1			0		55	27356	27411	28059
	1	0			1		473	30743	31216	31201
		0					0
		1
	1	0			1		190	43188	43378	43681
	1	0			1		469	46532	47001	47096
20160122w18	1	0			1		262	595	857	1278
	1	0			1		479	4445	4924	5317
	1	0			1		784	8203	8987	8893
	1	0			1		195	10716	10911	11251
		pause
		0	1		1		354	17431	17785	17965
		0	1		1		486	20885	21371	21400
		1			0		775	24379	25154	25026
		0	1				79	28098	28177
	1	0					71	31337	31408
		0	1				171	34904	35075
		0	1				577	38415	38992
	1	0		1			126	42185	42311
	1	0					344	45349	45693
		1
	1	0					0
	1	0					356	56367	56723
		0	1				432	60148	60580
		0	1				912	64538	65450
20160122w22		1					852	1144	1996
		1					486	4500	4986
	1	0					137	9200	9337
		0	1				570	13691	14261
		1					682	20063	20745
		0	1				185	23656	23841
		1					318	27034	27352
20160122w21		0	1				576	4048	4624
	1	0					547	8846	9393
		0	1				651	12399	13050
		0	1				406	16333	16739
		0		1			224	19779	20003
	1	0					496	23318	23814
	1	0					573	27209	27782
		1
		0	1
		0	1				479	38670	39149
	1	0					375	42084	42459
20150914w4	1	1					104	530	634
	1	0					517	3166	3683
	1	0					354	5696	6050
		0	1				677	8075	8752
		0	1				597	10714	11311
		0	1				573	15879	16452
		0	1				596	18434	19030
	1	0					302	21327	21629
	1	0					638	23706	24344
		0	1				392	26309	26701
		1					154	29194	29348

## Sheet: 18s
worm name	reversal with omega turn	reversal without omega turn	omega turn following dlp off	turn but not change direction	reversal length(s)	reversal length(frame)	reversal start(frame)	reversal end(frame)	experimental condition
20160122w23	2	0	1			104	1496	1600	floor illumination
	1	0	1	1		100	5828	5928
	2	0				386	10331	10717
	1	0	2
		0	1	1
	1	0	1			250	24131	24381
	1	0	1			179	28987	29166
		0		2		323	34148	34471
	1	0	1			473	39944	40417
		0	1			253	44504	44757
20160122w24		0	1			975	2200	3175
	1	0
	1	0				631	12070	12701
	1	0				345	16503	16848
		0	1			427	20905	21332
		0	1			1119	25543	26662
		0	1			564	30708	31272
	1	0				569	34680	35249
	1	0				863	38717	39580
		1				518	42943	43461
	1	0	1			297	47133	47430
	1	0				624	52411	53035
		1				793	56590	57383
	1	0				677	60961	61638
20160122w25		0	1	1		530	1529	2059
		0	1	1		282	6072	6354
	1	0				189	10373	10562
	1	0		1		517	14321	14838
		0	1	1		341	18496	18837
	2	0				372	23696	24068
	1	0				712	29754	30466
		0	1			911	32645	33556
	1	0	1			429	37020	37449
	2	0				373	39748	40121
	1	0				312	44126	44438
		1				615	48050	48665
		1				271	52459	52730
		1				98	56930	57028
	1	0				792	62006	62798
20160122w27	2	0				237	1452	1689
	1	0		1		136	5166	5302
	1	0				357	8052	8409
	1	0				208	12536	12744
	2	0				204	17590	17794
	2	0				246	22913	23159
		0		1		242	27484	27726
		0	1	1		201	31587	31788
	1	0				253	35969	36222
		0		1		341	40455	40796
	1	0	1			498	45296	45794
