# Supplementary material for: Flexible motor sequence generation during stereotyped escape responses
Source: eLife journal article supplement (doi:10.7554/elife.56942), 2020-06-05
Supplement: supp [file elife-56942-supp-v1.zip]

**A**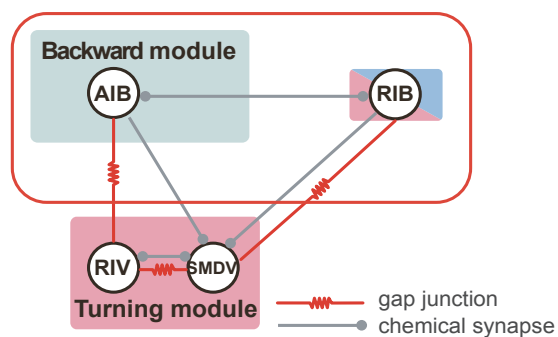**B**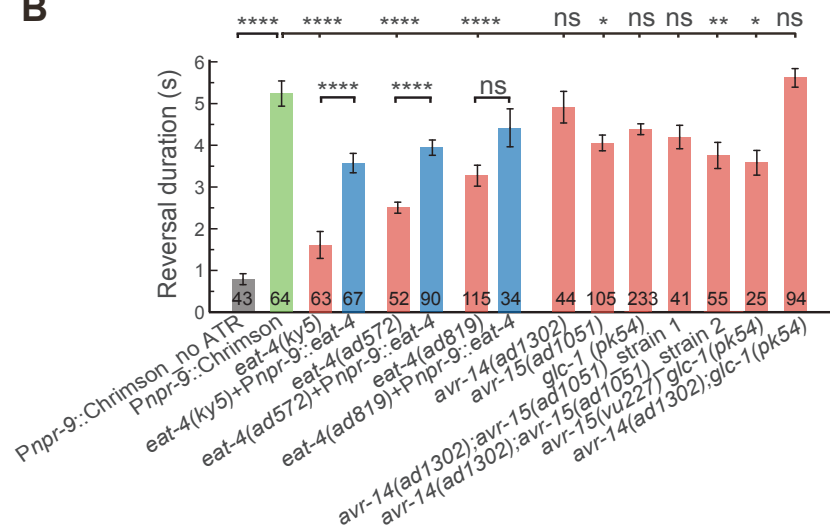**C**

AIB::Chrimson; RIB::GCaMP6 (control (ATR))

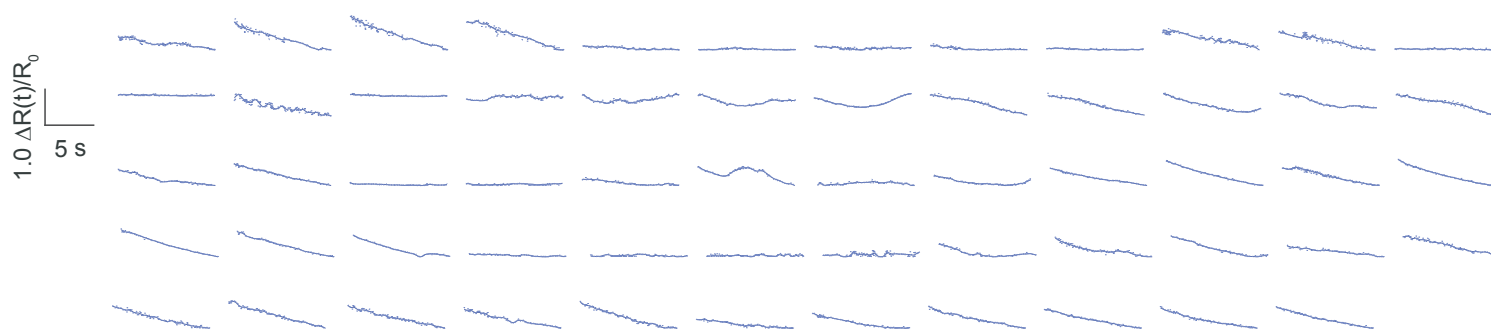

AIB::Chrimson; RIB::GCaMP6 (control (no ATR))

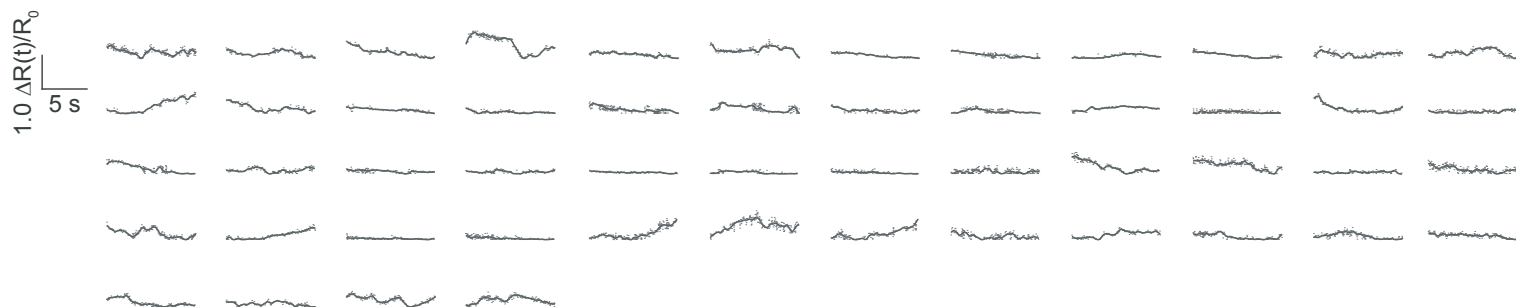*eat-4(ky5)III*; AIB::Chrimson; RIB::GCaMP6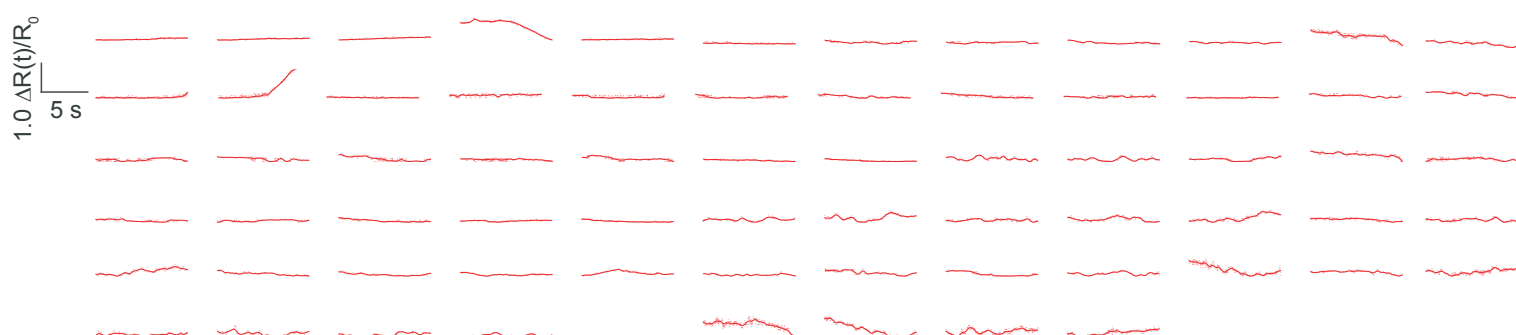

Time (s)
