# Supplementary material for: Flexible motor sequence generation during stereotyped escape responses
Source: eLife journal article supplement (doi:10.7554/elife.56942), 2020-06-05
Supplement: supp [file Figure 1-source data for Figure 1C and supplement 1A-B.xlsx]

## Sheet: summary
Raw data for Fig 1C，Fig 1-S1, Fig 2F(control), Fig 5C(control) and F, Fig 7B and E (strain: Pmec-4::ChR2)
worm name	n	turn	no turn	no response	pause		touching	no touching
Pmec-4_ChR2	674	322	272	79	1		283	39
	reversal length	SEM
	2.58315	0.053253

## Sheet: Pmec-4_ChR2
Raw data for Fig 1C，Fig 1-S1, Fig 2F(control), Fig 5C(control) and F, Fig 7B and E (strain: Pmec-4::ChR2)
worm name	duration of reversal(s)	turn?	note	note2	angle θ	head touching the body (or tail)?
20160719W1			no res	20160719
	3.149	1			139	1
	3.649	1			177	1
	4.769	1		switch head and tail	157	1
	3.255	0		switch head and tail	44
	3.239	0			78
W2	2.665	0			10
	2.028	1			170	1
20160720w4	3.286	1			139	1
	3.241	1			178	1
	1.937	0			22
	2.801	0			56
	3.3	1			151	1
	1.368	0			5
	0.848	0			44
	3.496	0			48
	0.954	0			20
	5.027	1			169	1
	1.015	0			20
	3.497	0			108
	1.182	0			53
	1.513	0			58
	1.241	1			140	1
	4.684	0			39
W5	3.169	0			40
	3.982	0			87
	4.026	0			13
	3.225	0			16	1
	5.298	0			57
	5.45	1		switch head and tail	162	1
	4.754	1			163	1
	1.257	0			41
	3.407	0			21
	1.226	0			30
w6	3.133	1			152	1
			no res
			no res
	0.453	0			71
w7	4.42	1			167	1
	4.723	1			134	1
	5.571	1			146	1
	4.029	1			172	1
	3.753	1			125	1
	3.18	0			20
	3.892	1			165	1
	3.3	0			66
	1.815	0			52
	3.952	1			164	1
	1.893	0			45
w8	3.74	1			143	1
	2.194	0			1
	1.649	0			10
			no res
	2.936	1			174	1
			no res
	0.242	0			94
w9	2.347	1			180	1
	1.256	0			81
	3.815	1			176	1
	5.343	1			163	1
	2.332	0			2
	3.95	1			172	1
	2.498	0			45
	1.801	0			16
	5.435	1			143	1
	0.65	0			94
			no res
	1.166	0			35
20160728w1	2.801	1		20160728	139	0
			no res
			no res
			no res
	5.133	1			164	1
w2	3.376	1			160	0
	0.682	0			7
	3.845	1			180	1
	4.709	0			72
	4.224	1			160	1
	3.513	0			48
	1.122	0			77
			no res
	3.466	1			177	1
	1.56	0			38
	0.303	0			40
w3	4.876	1			175	1
			no res
			no res
	1.196	0			3
	3.36	0			37
	5.435	1			138	1
	4.648	1			160	1
	3.892	1			176	1
			no res
			no res
	0.377	0			76
20160801w2	4.057	1			172	1
	2.815	1			149	1
	3.725	1		switch head and tail	178	1
	3.012	1		switch head and tail	155	1
	3.83	0			48
	3.119	0			25
	3.679	1			154	1
	1.65	0			61
	4.603	1		switch head and tail	138	1
	0.819	0			66
	6.569	1		switch head and tail	166	1
	4.906	1		switch head and tail	144	1
	5.813	1		switch head and tail	149	1
	1.543	0			7
			no res
	1.62	0			128
	1.621	0			61
	1.227	0			30
w3	4.027	1			157	1
	1.075	0			15
	0.544	0			54
w5	1.788	0			93
	4.498	1		switch head and tail	166	1
	4.117	1		switch head and tail	142	1
	1.558	0			65
	4.922	0		switch head and tail	59
	4.74	1			155	1
	1.832	0			70
	4.481	1		switch head and tail	157	1
	1.5	0			12
	5.132	1		switch head and tail	155	1
	1.044	0			75
w6	4.753	1			165	1
	3.043	1			159	1
	4.012	1			143	0
	3.558	1			139	1
	3.845	1			144	1
	2.379	1			142	1
	3.013	1		switch head and tail	166	1
	6.72	1		switch head and tail	151	1
	2.982	1		switch head and tail	139	1
	3.759	1			145	1
	4.814	0		switch head and tail	7
	3.497	1		switch head and tail	139	1
	3.255	0			14
	3.224	1			145	1
	0.317	0			22
w7	1.664	0			82
	2.151	0			1
	5.95	1			155	1
			no res
	3.589	0			67
w10	0.227	0			114
	3.859	1			172	1
	0.226	0			107
W11	4.3	1			162	1
	1.528	0			8
			no res
	1.257	0			8
			no res
	0.591	0			32
	0.288	0			79
W12	0.635	0			25
			no res
	1.892	1			163	1
			no res
	1.212	1			174	1
	3.223	1			164	1
	6.055	1			148	1
W14	4.134	1			155	1
	1.303	0			56
	5.51	1			157	1
	0.787	0			65
	1.317	0			23
			no res		58
	1.03	0			58
	4.132	1			141	1
			no res
			no res
	1.242	0			61
	0.575	0			102
	0.242	0			131
	3.68	1		switch head and tail	153	1
	0.379	0			30
	0.456	0			4
			no res
	0.561	0			48
20160802W1	2.559	1		20160802	163	1
	2.998	0			90
	1.379	0			36
W2	2.074	0			33
	2.286	1			172	1
	3.376	1			145	1
	3.452	1			145	1
	2.86	1			171	1
	2.089	0			21
	3.526	1			126	1
	2.786	1			119	1
	1.24	0			59
	3.936	1			106	1
	1.756	1			152	1
	1.863	1			160	1
	3.012	1			176	1
	1.589	0			37
	2.605	0			3
	1.801	0			120
	1.363	0			56
w4	2.786	0			18
			no res
	1.439	1			143	1
w5	4.209	0			24
	3.997	1			149	1
	0.877	0			1
	2.241	0			25
	1.318	0			27
	3.15	1			164	1
w6	2.877	1			138	1
	2.544	1			145	1
	2.286	1			143	1
	2.393	1			172	1
	2.423	1			164	1
	2.105	0			24
	1.878	0			4
	2.709	1			171	1
	3.286	1			158	1
	4.33	1			176	1
	3.007	0			30
	2.711	1			169	1
	3.89	0			34
	3.363	1			178	1
	3.028	1			172	1
	3.361	1		switch head and tail	145	1
	3.769	0			47
	2.12	0			21
	1.408	0			3
	3.875	1			165	1
W7	4.39	1			180	1
	1.407	0			78
	3.315	1			176	1
	3.225	1			158	1
	4.814	1			147	1
	1.545	0			69
			no res
	2.815	1			136	1
			no res
	4.043	1			180	1
	2.302	1			169	1
			no res
	2.716	1			140	1
			no res
W9	1.773	1			120	1
	4.86	1			154	1
	2.317	0			53
	2.149	0			71
	3.057	1			145	1
W10	3.089	0			3
	4.072	1			177	1
			no res
	3.635	1			170	1
W11	3.509	1			134	1
	3.861	1			170	1
	3.483	0			43
	2.863	1			136	1
	3.209	1			173	1
	2.724	1			143	1
	3.982	0			67
	1.059	0			40
	2.533	0			34
	3.617	1			174	1
	3.331	1			169	1
	2.986	1			107	1
	0.514	0			1
	1.085	0			56
	3.453	0			70
	1.046	0			61
w12	5.905	1		switch head and tail	145	1
	1.104	0			38
	1.134	0			34
	0.985	0			61
	1.273	0			71
20170719W1	3.351	1			161	1
	3.693	1			165	1
	1.999	1			180	1
	3.27	1			147	1
	2.279	1			169	1
	2.846	1			164	1
	3.695	1			158	1
	5.097	0			85
W5	2.039	1			160	1
	6.242	0			25
			no res
	1.292	0			62
	1.171	0			7
w7	2.221	1			159	1
	2.887	1			180	1
	0.949	0			5
			no res
	0.343	0			49
	0.606	0			22
W9	1.454	1			155	1
	2.867	1			175	1
	1.641	0			30
	3.753	1		cross	168	1
	1.677	0			50
			no res
	0.525	0			26
			no res
W10	2.342	1			151	0
	2.16	1			159	1
	3.113	1			163	1
	2.765	1			148	1
	2.119	1			161	1
	4.116	1			144	1
			no res
	5.147	1			149	1
	1.291	0			107
			no res
W13	2.993	1			163	1
	3.351	1			167	1
	3.774	1			151	1
	1.212	0			33
	3.393	1			156	1
	4.501	1			117	1
			no res
	4.523	1		cross	145	1
	4.947	1			163	1
	4.582	1			153	1
			no res
W14	1.554	0			15
	5.532	1			150	1
	1.109	0			37
	1.412	0			92
	0.788	0			80
W15	1.636	1			167	1
	0.324	0			3
	3.457	1			120	1
	0.202	0			38
			no res
20180518 w1	4.783	1			154	1
	2.917	1			142	1
	2.383	1			149	1
			no res
	2.377	1			133	1
	2.125	0			39
	2.18	0			29
			no res
w6	2.8	0			58
	2.103	0			52
			no res
	2.644	1			180	1
	3.074	1			154	1
	3.573	1			146	0
	3.391	1			148	0
	3.165	1			151	0
	2.372	1			139	1
	0.696	0			80
w8	2.786	1			170	0
	2.291	0			92
	2.543	0			98
	1.969	0			70
	2.558	1			151	0
w11	2.523	0			0
	2.467	0			28
	2.151	1			140	1
	3.466	1		switch head and tail	138	1
	2.348	0			38
	3.23	0			104
	2.084	0			5
	2.024	0			59
	2.498	1			167	1
	2.432	1			166	1
w12	1.867	1			171	1
	3.533	0			26
	2.26	0			59
	2.437	0			9
	2.195	0			69
	3.238	1			173	0
	2.529	1			165	1
	3.226	1			179	0
	4.434	0			87
	3.104	0			26
w13	1.847	0			23
	0.959	0			81
	2.453	0			73
	1.866	1			159	0
	1.786	1			157	1
	3.462	1			148	1
	1.62	1			169	1
	2.361	0.5		switch head and tail	129	1
w14	1.786	1			134	1
	1.543	1			160	1
	3.27	1		switch head and tail	138	1
	2.968	1		switch head and tail	124	1
	1.599	0			1
	3.558	1		switch head and tail	167	1
	1.515	0			116
	2.272	0		switch head and tail	130
w15	3.102	1		switch head and tail	143	1
	2.761	1			159	1
	2.361	1			144	1
	2.635	0			36
	2.226	1			147	1
	2.528	0			13
	1.69	1			135	1
	2.19	1			119	1
	2.883	1			127	1
	2.65	1			148	1
	2.12	1			145	1
	0.773	0			38
w18	2.387	1			143	1
	3.401	0		switch head and tail	70
	0.135	0			33
	1.788	1			158	1
	2.135	1		switch head and tail	124	1
	2.726	1			138	1
	3.118	1			140	1
	4.173	1		switch head and tail	129	1
	0.984	1			178	1
	4.582	1		switch head and tail	143	1
			no res
w20	1.846	0			91
			no res
	1.076	1			147	1
	1.408	1			178	1
	0.288	0			17
	1.726	1			146	1
			no res
	1.5	0			51
	2.058	0			53
	2.074	0			11
	0.803	0			22
w21			no res
			no res
	1.166	0			72
	4.755	0			37
	3.149	1			167	0
	1.791	0			14
	2.981	1			141	1
	3.164	1			156	1
	2.558	0			57
	2.948	0			103
w22			no res
	1.502	0			74
	1.635	1			143	1
	3.347	1			177	1
	0.923	1			177	1
	1.863	0			66
	0.94	0			37
	3.341	1			180	0
	1.19	0			48
	1.121	1			177	1
	2.801	1			174	1
			no res
w23-1	2.498	1			156	0
	1.125	0			25
	2.802	1		switch head and tail	163	1
	3.201	1		switch head and tail	149	1
	3.421	1		switch head and tail	144	1
w23-2			no res
	1.75	1			146	1
			no res
	1.651	0			52
	2.559	1			138	1
w26	1.212	1			150	1
	0.541	0			20
	2.952	0			29
	1.664	0			80
	1.544	1			167	1
	2.483	1			170	1
	0.741	0			21
	1.166	0			20
			no res
	0.363	0			45
w27	2.408	0		switch head and tail	87
	1.899	0		switch head and tail	12
	3.23	0		switch head and tail	111
	2.942	1		switch head and tail	165	1
	4.145	1		switch head and tail	87	1
	3.604	1		switch head and tail	140	1
	4.118	1		switch head and tail	129	1
	4.375	1			154	1
	2.618	1			129	1
	4.587	1		switch head and tail	159	1
w28	1.923	1			140	1
	1.815	0			83
	0.483	0			13
	1.852	0			9
	0.516	0			10
	4.225	1			142	1
			no res
	3.149	1			142	1
	1.605	0			2
	1.591	0			26
W30	1.346	0			60
	2.316	0			55
			no res
	2.696	0			24
	3.36	1		switch head and tail	141	0
	2.938	0			11
	3.317	1		switch head and tail	124	1
	2.771	1		cross	143	0
	1.848	0			21
	2.043	0			35
W31	1.029	1			158	1
			no res
	0.273	0			28
			no res
			no res
			no res
			no res
	0.999	0			84
	2.089	0			12
	3.008	1			170	1
			no res
			no res
			no res
20180525 w4			no res
			no res
	1.014	0			51
	3.225	1			146	1
	2.685	1			141	1
	3.623	1			172	0
			no res
			no res
	0.454	0			24
w9	3.386	1			170	1
	1.863	0			32
			no res
			no res
w10	0.65	0			4
	0.959	0			66
	0.954	1			162	1
			no res
			no res
	0.675	0			33
	3.789	1			164	0
	1.77	1			171	1
	2.891	1			167	1
	2.285	1			155	1
	2.675	1			156	1
			no res
	3.21	1			170	1
			no res
w11	1.076	0			49
			no res
	0.858	0			66
	3.053	0			5
	2.043	1			169	1
	4.92	0			14
	1.524	0			37
	0.562	0			1
	3.481	1			172	0
	2.287	1			165	1
	1.576	1			169	1
	2.317	1			171	1
	0.743	0			31
	0.909	0			64
			no res
	1.785	0			99
			no res
	0.923	1			157	1
20180529 w1	1.549	1			144	0
	2.225	1			174	1
	1.467	0			7
	0.728	0			42
	0.908	0			39
	1.475	0			22
	0.892	0			86
	1.963	0			55
			pause
	0.864	0			64
w8	1.876	1			177	1
	1.06	1			168	0
	1.937	1			166	1
	1.313	0			17
	2.149	1			159	1
			no res
			no res
	1.529	1			147	0
	2.634	1		cross	156	1
			no res
	2.119	0			55
	1.332	0			69
w14	3.301	0			40
	2.119	0			78
	3.73	1			178	0
	3.018	0			59
	4.103	0			69
	4.264	1			180	0
	4.45	1			136	0
	3.649	1			157	0
	4.253	1			168	0
w17	2.543	0			21
	2.111	0			5
	2.499	1			160	0
	6.653	1			164	0
	2.962	1			170	1
	3.966	1			151	1
	3.175	1			164	1
	2.997	0			23
	2.257	0		switch head and tail	16
	2.668	1			164	1
	2.805	0		crossswitch head and tail	107
20180601w2	2.451	0			101
	3.476	1			171	1
	3.039	1			168	1
	1.513	0			16
	3.346	1			162	1
	2.584	1			150	1
	1.908	1			156	1
	1.943	0			58
	2.755	1			177	0
	1.403	0			15
	1.015	0			5
	3.171	1			153	1
	2.189	1			176	0
w4	2.255	0			83
	5.167	1			175	1
	2.584	1			145	1
	2.635	1			158	1
	3.844	1			171	1
	2.613	1			166	1
	3.128	1			168	1
	3.347	1			155	1
	2.644	1			159	1
	3.019	0			51
	3.831	1			153	1
	0.303	0			21
	4.71	1			151	1
	4.078	1			166	1
	2.891	0			73
w5	1.887	0			83
	2.412	1			143	1
	3.457	1			135	1
	1.56	0			89
	3.786	1			141	0
	3.074	1			164	1
	2.264	1			174	1
	2.241	0			88
w8	1.985	0			89
	3.588	1			174	0
	3.416	1			122	1
	2.305	1			150	1
	0.454	0			89
	2.649	1		switch head and tail	165	1
	3.205	1			172	0
	2.363	1			157	1
	2.104	1			166	1
	2.423	1			179	1
w9	1.231	0			86
	3.392	1		switch head and tail	147	1
	3.377	1			149	1
	2.423	0			70
w12	0.515	0			61
	1.377	1			143	1
	3.509	1		switch head and tail	150	0
	4.103	1		cross	119	1
	0.166	0			24
	2.406	1			110	1
	0.303	0			23
	3.88	1			137	1
w13	2.302	0			7
	3.518	1			161	0
	2.744	1		switch head and tail	126	1
	3.241	1			149	1
	3.184	1			146	1
	3.482	1			170	1
	4.38	1		switch head and tail	142	0
	2.029	0			70
	4.012	0		switch head and tail	94
	2.933	0		switch head and tail	95
w15	0.242	0			76
	0.983	0			81
	2.21	1			164	1
	2.079	1			177	1
			no res
	2.786	1			139	1
	4.483	1			141	0
	0.338	0			34
