# Supplementary material for: Flexible motor sequence generation during stereotyped escape responses
Source: eLife journal article supplement (doi:10.7554/elife.56942), 2020-06-05
Supplement: supp [file Figure 1-source data for Figure 1D.xlsx]

## Sheet: wild type_thermal
Raw data for Fig 1D, Fig 6B(red)
turn	reversal duration	date
0	1.735	2018,0505+2018,0519
0	2.093
1	2.371
1	2.412
1	2.887
0	1.685
0	1.347
1	2.764
1	1.786
1	1.902
1	1.892
0	0.978
0	0.919
0	1.11
1	2.479
0	1.079
0	1.12
0	0.98
0	1.186
0	1.645
0	0.938
1	3.508
0	1.071
0	1.029
0	3.151
1	2.438
1	2.412
0	2.69
1	1.06
0	1.957
1	1.493
1	2.714
1	2.25
0	0.798
1	1.933
0	0.748
1	1.079
0	1.039
0	1.256
0	1.923
0	2.356
0	1.13
1	2.745
0	0.874
1	2.431
1	0.955
1	1.147
0	1.192
0	0.912
1	3.381
1	4.649
1	3.503
1	3.16
0	1.656
1	2.401
0	1.852
1	3.296
0	1.747
0	1.899
1	2.775
1	1.539
1	2.119
1	2.323
1	2.538
0	0.873
0	0.787
0	1.863
0	0.988
1	2.483
0	1.029
1	3.275
0	1.685
0	2.1
1	3.079
1	2.325
0	0.505
1	4.658
1	2.442
0	1.029
0	2.923
1	3.443
0	2.872
0	2.479
1	2.726
0	2.151
1	2.524
0	1.382
0	1.488
1	1.584
0	1.091
0	1.478
0	1.288
0	2.09
1	3.784
0	1.655
0	1.665
0	1.735
1	1.793
0	0.753
1	1.529
0	1.49
0	1.137
0	1.019
1	2.726
1	3.447
1	2.962
0	3.026
0	3.461
1	2.568
1	2.861
1	2.539
1	1.432
0	1.798
0	1.765
1	2.175
1	2.08
1	2.05
1	1.851
0	1.125
0	1.176
1	5.137
1	5.077
1	4.001
0	1.827
0	1.655
0	1.697
1	2.529
1	2.185
0	1.862
0	2.005
1	2.028
1	2.524
1	3.805
1	3.614
0	1.02
0	1
1	3.774
0	1.984
0	1.777
1	3.698
0	2.266
0	1.861
0	2.58
1	2.352
1	1.216
1	2.786
0	2.791
0	1.392
1	2.649
1	1.403
0	1.317
0	0.803
0	1.644
0	1.716
1	2.744
0	1.745
1	3.559
0	4.87
1	4.89
1	5.808
1	7.367
1	2.543
1	6.716
0	1.786
1	3.618
1	2.599
1	3.925
0	1.332
1	4.422
0	1.302
0	1.767
1	5.456
1	6.55
0	2.345
0	1.468
0	3.522
1	6.979
0	1.374
1	3.885
0	4.76
0	1.07
1	8.1
1	9.382
0	4.88
1	5.269
1	5.272
1	6.259
0	3.609
1	5.562
1	4.608
0	2.807
0	3.179
1	4.718
0	2.861
1	4.541
1	4.466
1	3.141
1	3.986
1	4.074
0	3.452
0	2.932
1	5.501
1	5.26
1	4.587
0	4.274
1	5.666
1	2.473
1	2.873
1	4.097
0	3.216
1	2.954
0	3.175
0	2.584
1	3.053
1	3.87
0	2.239
1	2.856
1	4.471
0	3.548
1	4.481
1	4.784
0	2.342
0	2.973
0	2.826
1	2.83
1	3.128
0	4.421
1	4.526
0	3.452
0	1.99
1	2.973
1	3.598
1	2.862
1	2.578
0	2.236
1	4.31
0	4.577
1	3.007
0	1.05
0	1.344
1	4.416
1	2.831
0	4.942
1	5.374
1	3.291
1	3.315
0	3.452
1	2.555
1	4.929
1	3.224
0	2.992
0	4.118
0	3.588
1	2.62
0	2.931
1	3.463
0	1.801
0	2.029
1	2.336
1	1.943
0	2.952
0	1.15
0	2.438
1	1.973
1	2.07
0	1.812
1	2.164
0	0.954
1	1.276
0	2.118
0	2.079
1	1.136
0	1.933
0	1.11
1	3.361
1	2.999
0	2.161
0	1.15
1	2.252
0	1.786
1	1.685
1	2.776
0	1.777
0	1.489
1	3.664
1	1.391
1	1.736
1	2.262
0	1.383
0	1.084
0	1.352
0	1.949
0	0.728
0	1.01
1	2.538
1	1.191
0	1.736
1	2.887
0	1.56
0	1.766
0	1.609
0	2.048
0	2.088
1	2.817
1	2.322
0	1.196
0	0.853
0	1.389
0	1.529
1	2.226
1	3.569
1	2.312
0	1.039
0	2.069
0	1.524
1	1.684
0	2.085
1	1.539
1	3.316
0	3.069
0	1.352
0	0.591
1	1.596
1	2.579
1	1.192
1	2.079
0	1.883
1	2.923
0	1.362
1	1.428
1	2.443
1	1.978
0	1.263
0	1.09
1	3.794
1	2.635
1	2.236
0	1.03
0	1.055
0	2.13
1	1.296
1	3.205
0	1.303
1	0.995
1	1.195
0	2.845
1	2.514
0	3.452
1	1.08
0	0.715
0	1.599
0	1.444
1	2.706
1	2.704
0	2.483
0	0.801
1	4.077
0	1.179
0	0.978
0	1.301
1	3.427
0	0.948
1	2.129
0	1.494
1	2.507
1	2.686
1	1.373
0	1.283
1	2.21
0	0.747
0	1.726
0	0.772
0	0.536
1	2.187
0	1.05
1	2.443
0	1.498
1	0.842
0	1.152
1	1.489
0	1.019
0	0.833
1	4.537
1	5.011
1	2.841
