# Supplementary material for: Flexible motor sequence generation during stereotyped escape responses
Source: eLife journal article supplement (doi:10.7554/elife.56942), 2020-06-05
Supplement: supp [file Figure 2-source data for Figure 2-figure supplement 1E.xlsx]

## Sheet: Summary
for Figure 2 - figure supplement 1E
worm name	reversal without turn rate	reversal with turn rate	SD	n	a	confidence interval	lower confidence limit	upper confidence limit		reversal without turn num	reversal num	E/F
QW910ctrl	0.464052	0.535948	0.498701	153	0.05	0.079021	0.456927	0.614969
1s	0.560976	0.439024	0.496268	82	0.05	0.107413	0.331611	0.546438		46	82	0.560976
3s	0.504762	0.495238	0.499977	105	0.05	0.0956321	0.399606	0.59087		53	105	0.504762
5s	0.52809	0.47191	0.49921	89	0.05	0.103714	0.368196	0.575624		47	89	0.52809
7s	0.5	0.5	0.5	70	0.05	0.11713	0.38287	0.61713		35	70	0.5
12s	0.337838	0.662162	0.472973	74	0.05	0.107763	0.554399	0.769925		25	74	0.337838
15s	0.324675	0.675325	0.468253	77	0.05	0.104588	0.570736	0.779913		25	77	0.324675
18s	0.241379	0.758621	0.42792	58	0.05	0.110128	0.648493	0.868748		14	58	0.241379
p value x2-test
worm name	reversal with turn	reversal without turn	n	p value _x2 test	lable	multi p
QW910ctrl	82	71	153
1s	36	46	82	0.156663	ns	1.09664	ns
3s	52	53	105	0.52025	ns	3.64175	ns	p<0.05 *
5s	42	47	89	0.336543	ns	2.3558	ns	p<0.01 **
7s	35	35	70	0.617883	ns	4.32518	ns	p<0.001 ***
12s	49	25	74	0.071182	ns	0.498274	ns	p<0.0001 ****
15s	52	25	77	0.0430914	*	0.301639	ns
18s	44	14	58	0.00323745	**	0.0226622	*

## Sheet: RIM_ChR2 ctrl
Raw data for Figure 2 - figure supplement 1E, 1G
worm	frame	reversal?	turn
20160324qw910w1	296	1	1	QW910 no ATR
	3578	1	0	recording
	8366	1	0	spontaneous reversal
	9368	1	0
	13312	1	1
	15341	1	0
	15693	1	1
	16679	1	0
	17228	1	0
	18961	1	1
	21346	1	0
w2	780	1	0
	1480	1	1
	7342	1	0
	9025	1	0
	9350	1	0
	10095	1	1
	11499	1	1
	12790	1	1
	12350	1	1
	13580	1	1
	14500	1	1
	16680	1	0
	18000	1	0
	19550	1	0
	20190	1	1
	21600	1	0
	22157	1	1
	22980	1	1
	24532	1	1
	25624	1	0
	28053	1	0
	30416	1	0
	31597	1	1
w3	580	1	0
	1587	1	0
	3415	1	0
	28895	1	1
	29928	1	1
	30943	1	1
	31852	1	1
	33000	1	1
	36200	1	1
	37000	1	1
	39500	1	0
	40200	1	0
	41000	1	0
	42300	1	0
	43980	1	0
	45818	1	1
	48000	1	0
	49000	1	1
w4	4240	1	0
	5427	1	0
	9666	1	1
	10900	1	1
	12000	1	0
	12414	1	0
	14600	1	0
	15170	1	1
	16262	1	1
	17136	1	1
	20573	1	0
	22749	1	0
	24025	1	1
	30268	1	0
	31473	1	0
	34787	1	0
	38169	1	0
W5	200	1	0
	3000	1	1
	1200	1	0
	7700	1	0
	8500	1	0
	13700	1	0
	14877	1	1
	15388	1	1
	19000	1	1
	21545	1	0
	25889	1	0
	28943	1	0
	29844	1	1
	33493	1	0
	34622	1	1
	37631	1	0
W6	1214	1	1
	3234	1	1
	6500	1	1
	8500	1	1
	11800	1	1
	13600	1	1
	20000	1	1
	21442	1	0
	22038	1	1
	23968	1	1
	28745	1	1
	32041	1	1
	34617	1	1
W7	6224	1	0
	8262	1	1
	11952	1	0
	14065	1	1
	21000	1	1
	23000	1	1
	25000	1	1
	30348	1	0
W8	733	1	0
	3000	1	0
	5000	1	0
	5800	1	1
	12000	1	1
W9	8500	1	1
	9600	1	1
	10200	1	1
	13800	1	0
	18629	1	0
	20349	1	1
	21427	1	1
	25184	1	1
	30112	1	0
	30808	1	0
	39173	1	1
W10	720	1	1
	2736	1	1
	4015	1	0
	8000	1	1
	11429	1	1
	16212	1	1
	17760	1	0
	18275	1	0
	19123	1	0
	21889	1	1
	24420	1	1
	28606	1	0
	32800	1	1
	33700	1	1
W11	3700	1	0
	7840	1	0
	10300	1	0
	11000	1	1
	13626	1	1
	14115	1	0
	15792	1	1
	18322	1	0
	19843	1	0
	22050	1	1
	23500	1	1
W12	2720	1	0
	8600	1	1
	10858	1	1
	12500	1	1
	14000	1	1
	15500	1	1

## Sheet: 1s
worm name	r with omega turn	r without omega turn	omega turn following reversal	turn but not change direction	condition
20151113w1		0	1		floor illumination
		0	1
		0	1
		0	1
		0	1
		0	1
		1	0
		1	0
		0	1
		1	0
		1	0
		1	0
		1	0
		1	0
		0	1
		0	1
		0	1
		0	1
		1	0
		1	0
		1	0
		0	1
		1	0
		1	0
w2		1	0
		1	0
		0	1
		0	1
		0	1
		1	0
		1	0
		1	0
		0	1
		1	0
		1	0
		0	1
		1	0
		1	0
		0	1
		1	0
w4		1	0
		0	1
		0	1
		0	1
		0	1
		0	1
		1	0
		0	1
		1	0
		1	0
		1	0
		1	0
w5		1	0
		1	0
		1	0
		0	1
		1	0
		1	0
		1	0
		0	1
		0	1
		1	0
		1	0
		0	1
		1	0
		1	0
		0	1
		1	0
w6_1		0	1
		0	1
		1	0
		0	1
		0	1
		0	1
		0	1
		0	1
		1	0
		1	0
		1	0
		1	0
		1	0
		1	0

## Sheet: 3s
worm name	r with omega turn	r without omega turn	omega turn following reversal	turn but not change direction	condition
20151113w3		0	1		floor illumination
		0	1
		1	0
		0	1
		1	0
		0	1
		0	1
		0	1
		0	1
		1	0
		0	1
		0	1
		1	0
		1	0
		0	1
		1	0
		1	0
		1	0
		1	0
20151113w8		0	1
		0	1
		1	0
		1	0
		1	0
		1	0
		1	0
		0	1
		0	1
		1	0
		0	1
		0	1
		0	1
		1	0
		1	0
		1	0
		1	0
		0	1
		1	0
		0	1
		0	1
20151216w1		0	1
		0	1
		1	0
		1
		0	1
		1
		1
		0	1
		1
		0	1
		1
		0	1
		1
		1
		1
		0	1
		1
201512216w2		1
		0	1
		0	1
		0	1
		1
		0	1
		1
		0	1
		0	1
		1
		0	1
		0	1
		0	1
		0	1
		0	1
		1
		1
20151216w3		0	1
		1
		1
		0	1
		0	1
		0	1
		1
		1
		0	1
		0	1
		1
		1
		1
		1
		1
		1
		1
		1
20151216w4		1
		1
		0	1
		1
		0	1
		0	1
		0	1
		0	1
		0	1
		1
		0	1
		0	1
20151216w16		1

## Sheet: 5s
worm name	r with omega turn	r without omega turn	omega turn following reversal	turn but not change direction	condition
20151113w6_2		0	1		floor illumination
		0	1	1
		0	1
		1	0
		0	1
		0	1	1
		0	1
		0	1
		0	1
		0	1
		1	0
		1	0
20151113w7		1	0
		0	1
		0	1
		1	0
		1	0
		0	1
		0	1
		1	0
20151216w5-1		1
		1
		1
20151216w5_2		0	1
		0	1
		0	1
		0	1
		0	1
		1
		0	1
		0	1
		0	1
		0	1
		1
		0	1
		0	1
		1
		1
		1
		1
20151216w6		0	1
		0	1
		0	1
		1
		0	1
		1
		1
		0	1
		1
		0	1
		0	1
		1
		1
	1	1
		0	1
		1
		1
20151216w7		1
		1
		1
		1
		1
		1
		0	1
		0
		1
		0	1
		0
		1
		0
		1
		0	1
		1
		1
		0
20151216w8		1
		1
		1
		0	1
		0	1
		1
		0	1
		1
		1
		1
		1
		1
		1
		1

## Sheet: 7s
worm name	r with omega turn	r without omega turn	omega turn following reversal	turn but not change direction	condition
20151113w9	1	0			floor illumination
		0	1
		1
		1
		1
		1
		1
		1
20151113w10	1	0
	1	0	1
		1
		1
		0	1	1
		1
		0	1
	1	0
		0	2	1
		1
	1	0
20151113w11		1	0
		0	1
	1	0
		1	0
		0	1
		0	1
		0	1
		0	1
		0	1
		1	0
		0	1
		1	0
		1	0
20151113w12		1	0
		0	1
		1	0
		1	0
		1	0
		1	0
		1	0
20151113w13		1	0
		0	1
		1	0
		1	0
		0	1
	1	0
		0	1
		1	0
20151216w9		0	1
		0	1
		0	1
		0	1
		0	1
		0	1
		0	1
		0	1
		0	1
		0	1
		0	1
20151216w10		1
		1
		0	1
		0	1
		1
		1
		1
		1
		1
		1
		1
		1

## Sheet: 12s
worm name	turn num	r with omega turn	r without omega turn	omega turn following reversal	turn but not change direction	condition
20151113w14	1	1	0			floor illumination
	0		1
	0		1
	0		0
	0		1
20151113w16	1		0	1
	1		0		1
	1	1	0
	1		0	1
	1		0		1
	0		1
	1		0	1
	1		0	1
	2		0	1	1
	0		1
20151113w17	1		0		1
	2		0	1	1
	1		0		1
	1		0		1
	2		0	1	1
	1		0		1
	1		0		1
	0		1
	2		0	1	1
	1		0		1
	1		0	1
	1		0		1
20151113W18	1		0		1
	1		0	1
	1		0		1
	1		0		1
	0		1
20151216w11	0		1
	1		0	1
	1		0	1
	1		0	1
	1		0	1
	0		1
	1		0	1
	0		1
	0		1
	0		1
20151216w12	1		0	1
	0		1
	0		1
	1		0		1
	0		1
	0		1
	1		0		1
	1		0		1
	1		0		1
	1		0		1
	0		1
	0		1
	1		0	1
	1		0	1
	1		0		1
	1		0		1
	1		0	1
	1		0	1
20151216w13	1		0		1
	1		0	1
	0		1
	1		0	1
	1		0	1
	0		1
20151216w14	0		1
	0		1
	0		1
	1		0	1
	0		1
	1		0	1
	0		1
	1		0		1

## Sheet: 15s
worm name	turn num	r with omega turn	r without omega turn	omega turn following reversal	turn but not change direction	condition
20151216w15	0		1			floor illumination
	1		0		1
	1		0	1
	1		0		1
	0		1
	1	1	0
	1	1	0
	1		0	1
	1		0	1
	0		1
	1		0	1
	1	1	0
	1		0		1
	0		1
	1	1	0
20151216w16	0		1
	1		0	1
	1		0		1
	0		1
	0		1
	1		0		1
	0		1
	0		1
	0		1
20151216w18	1		0		1
	1		0	1
	0		1
	0		1
	2		0	1	1
	1		0		1
	1	1	0
	1		0	1
	1	1	0
	1		0	1
	0		1
20151216w17	1		0	1
	0		0
	1	1	0
	0		1
	0		1
	1	1	0
	1		0	1
	1		0	1
	1		0	1
	1		0	1
	1		0	1
	1		0	1
20151216w19	1		0	1
	1		0	1
	0		1
	0		1
	1	1	0
	0		1
	0		1
	0		1
	1	1	0
	0		1
	1		0		1
	0		1
20151216w20	2		0	1	1
	2		0	1	1
	0		1
	1		0		1
	2		0	1	1
	1	1	0
	0		1
20151216w21	1		0	1
	2		0	1	1
	1	1	0
	2		0		2
	1		0	1
	0		1
	1		0	1
	1		0		1
	1		0	1
	1		0	1
	1		0		1

## Sheet: 18s
worm name	turn num	r with omega turn	r without omega turn	omega turn following reversal	turn but not change direction	condition
20151216w22	1	1	0			floor illumination
	0		1
	1		0	1
	2		0	1	1
	1	1	0
	1		0	1
	1	1	0
	1	1	0
	1	1	0
	1		0		1
	1	1	0
	1	1	0
	1	1	0
	1		0		1
	0		1
	1		0		1
20151216w24	1	1	0
	2		0	1	1
	1	1	0
20151216w25	1		0	1
	0		1
	1		0	1
	1	1	0
20151216w23	0		1
	1		0	1
	1		0		1
	1		0		1
	0		1
	0		1
	0		1
	0		1
	1		0	1
	1	1	0
	1		0	1
	1		0	1
	1	1	0
	1	1	0
20151216w26	1		0	1
	1		0	1
	1		0		1
	1		0	1
	1		0	1
	0		1
	1	1	0
	2		0	1	1
	0		1
	2		0	1	1
	0		1
	0		1
	0		1
20151216w16	1		0	1
	0		1
20151216w17	1		0	1
	1		0		1
	1		0	1
	1	1	0
	1		0	1
20151216w20	2		0	1	1
