# Supplementary material for: Flexible motor sequence generation during stereotyped escape responses
Source: eLife journal article supplement (doi:10.7554/elife.56942), 2020-06-05
Supplement: supp [file Figure 2-source data for Figure 2-figure supplement 1F.xlsx]

## Sheet: Summary
Raw data for Figure 2 - figure supplement 1F
worm name	reversal length	sem	p-value u-test	multi p-value	sig	n	turn num	turn rate
AIB::Chrimson	5.24113	0.3022				64	63	0.984375	0.015625
AIB::Chrimson*RIM::arch	2.0513	0.13955	2.3529e-16		****	83	80	0.963855	0.0361446
strain name	genotype	n	n of omega turns	probability of omega turns	no turn	sig	p-value	note	experimental conditions_laser
QW910	RIM	30	16	0.533333	14				5s BLUE 1.7
WEN0021	RIM/AIB	88	16	0.181818	72	**	0.000184076	compare with QW910	5s blue 1.7 +green 1.61
strain name	genotype	mean of reversal duration(s)	SEM of reversal duration(s)	significance	p-value	note
QW910	RIM	5.87278	0.25773	****	9.81878e-27
WEN0021	RIM/AIB	1.52859	0.1641	****	8.08907e-26	compare with QW910

## Sheet: AIB_Chrimson
Raw data for Figure 2 - figure supplement 1F
worm name	no response	reversal	turn	reversal+turn	reversal length
20161111w1				1	5.13248
				1	2.74035
				1	4.37547
				1	4.36033
w2				1	10.0379
				1	2.86147
				1	6.25284
				1	7.35806
				1	6.32854
				1	7.58516
				1	6.52536
w3				1	3.36109
				1	5.79864
				1	4.90537
				1	4.89023
		1			7.2218
				1	6.90386
				1	3.52763
				1	5.29902
				1	4.85995
				1	6.47994
w4				1	5.1022
				1	3.78501
				1	4.54201
				1	2.99773
				1	3.92127
				1	7.0704
				1	5.2536
				1	4.42089
				1	3.89099
				1	2.64951
20170911w1				1	1.654
				1	3.902
				1	4.331
				1	4.158
				1	4.079
				1	6.54
				1	7.288
				1	8.206
				1	6.217
				1	4.624
w2				0.5+0.5+1	1.818
				0.5+1	1.816
				0.5+1	2.286
				0.5+1	2.413
				1	9.355
				1	11.383
w3				0.5+1	1.918
				1	3.231
				1	4.325
				1	5.957
				1	6.722
				1	9.064
				1	12.505
				1	8.569
w4				1	2.522
				1	3.559
				1	3.458
				1	0.465
				1	6.297
				1	7.781
				1	3.937
				1	6.74
				1	7.873

## Sheet: AIB_Chrimson+RIM_Arch
worm name	no response	reversal	turn	reversal+turn	reversal length
20170601w1			1		0
				1	3.028
				1	1.472
				1	1.07
				1	3.835
w2				1	2.766
			2		0
			2		0.748
		1			0.203
			2	1	0.949
				1	4.037
				1	1.635
				0.5	1.514
w3				1	1.958
			1	1	0.605
				1	2.22
				1	2.442
			1	1	2.967
				1	1.959
				0.5	1.677
				1	2.947
			1	1	2.967
			1	1	2.726
			1	0.5	2.705
				1	2.755
				1	1.573
w4			1	1	1.03
			1	1	2.645
				1	1.171
				1	2.401
				1	1.977
				1	3.392
				1	1.837
				1	1.778
w5				1	0.99
				1	0.969
		1			1.333
				1	3.351
		1			3.108
w6			1	1	2.321
			1	1	1.172
				1	1.554
				1	0.668
w7			1	1	0.788
				1	1.393
				0.5	1.836
				1	1.475
				1	2.018
w8			1	1	1.049
			2	1	0.646
			1	1	1.565
			1	1	2.785
			1	1	1.292
				1	1.212
				1	1.656
W9				1	2.442
				0.5	2.018
				1	4.179
				0.5	5.173
				1	1.676
W10			1	1	1.655
			1	1	1.533
			1	1	2.16
			1	1	2.846
				1	5.995
			1	1	2.18
				1	3.936
				1	3.33
			1	1	4.762
				1	6.681
W11			1	1	1.677
			1	1	1.494
			1	1	1.251
				1	0.989
				1	3.37
			1	1	2.906
			1	1	1.17
			1	1	2.806
W13				1	0.767
			1		0
				1	1.432
				1	0.666
				1	0.99

## Sheet: RIM  ChR2
worm name	OMEGA TURN ?	reversal time duration (s)
20151113w6_2	y	6.91667
	y	2.75
	n	5.33333
	y	6.9
	y	5.5
	n	5.08333
	y	4.83333
	y	7.95
	n	3.43333
	n	5.03333
20151113w7	n	5.86667
	y	5.28333
	n	4.3
	n	5.35
	y	7.35
	n	5.31667
	n	5.61667
20151216w5_2	n	9.41667
	n	6.75
	n	6.73333
	y	7.45
	y	5.18333
	n	5.35
	y	7.48333
	y	6.18333
	y	5.51667
	y	4.76667
	n	4.95
	y	8.06667
	y	5.51667

## Sheet: RIM  ChR2;AIB  Arch
worm name	r with omega turn	r without omega turn	omega turn following reversal	turn but not change direction	reversal duration(s)	time of dlp on	condition
20160502w3		1			1.191	660	floor illumination
		1			0.384	5870
		1			0.788	10346
		1			0.399	15583
		1			1.191	19789
		1			4.688	25834
		1			1.381	31357
		1			0.414	36922
		1			1.782	42854
		1			1.221	47798
		1			1.1	52721
		1			2.195	56091
		1			0	60728
w4		1			0	2623
	1	0			4.012	6476
		1			0	11372
	1	0			2.27	14824
		0			0	17940
w5		1			1.227	923
		1			0	5486
		1			0	9357
		1			1.429	12342
		1			0.157	15091
		1			0	17286
		1			0	20649
		1			2.431	23570
		1			0.499	27545
		1			0	30375
		1			0	32842
		1			0	35289
		1			0	37739
		1			0	40571
		1			0	42779
w6	1	0			3.124	644
		0	1		2.262	4301
		1			1.59	6875
		1			6.549	9528
		1			3.118	12855
		1			1.988	15586
		1			4.027	18872
		1			4.815	22459
		1			3.685	26360
		1
		1			0.364	31562
w7		1			0.51	4021
		1			0.781	7161
	1	0			1.202	10484
		1			2.504	14069
		1			0.878	16546
		1			0.726	18515
		1			1.337	21026
		1			1.146	25231
		1			2.164	27968
		1			0.362	30831
		1			0.829	33392
		1			0	37663
		1			0.388	40066
		1			2.075	42086
w8		0	1		1.435	9505
	1	0			4.774	13091
		1			2.382	15579
		0	1		5.753	18388
		0	1		0.544	20101
		1			3.834	21784
		0	1		4.149	24471
		0	1		1.847	26713
		1			1.418	29893
		1			1.373	33246
		1			1.191	36850
		0	1		4.95	39754
		1			0.595	43292
		1			1.606	46183
		1			2.723	49167
		0	1		4.971	53057
		1			0.96	55961
		1			1.489	60472
w9		1			0.817	6252
		1			1.155	9373
		1			1.252	12053
		1			0	14601
		0	1		0.49	18761
		1			0	22848
		1			0.817	26683
	1	0			2.145	28907
		1			3.549	32416
		1			0.867	35421
		1			0.359	38752
		1			0.359	44968
