# Supplementary material for: Flexible motor sequence generation during stereotyped escape responses
Source: eLife journal article supplement (doi:10.7554/elife.56942), 2020-06-05
Supplement: supp [file Figure 2-source data for Figure 2-figure supplement 1G.xlsx]

## Sheet: Summary
for Figure 2 - figure supplement 1G (RIM::ChR2;AIB::TWK-18(gf))
RIM::ChR2;AIB::TWK-18(gf)
stimulation duration	reversal without turn rate	reversal with turn rate	sd	n	a	confidence interval	lower confidence limit	upper confidence limit		reversal without turn num	reversal num	E/F
1s	0.833333	0.166667	0.372678	30	0.05	0.133359	0.033308	0.300025		25	30	0.833333
3s	0.595238	0.404762	0.490846	42	0.05	0.148446	0.256316	0.553208		25	42	0.595238
5s	0.733333	0.266667	0.442217	30	0.05	0.158242	0.108424	0.424909		22	30	0.733333
7s	0.833333	0.166667	0.372678	30	0.05	0.133359	0.033308	0.300025		25	30	0.833333
12s	0.78125	0.21875	0.413399	32	0.05	0.143233	0.0755173	0.361983		25	32	0.78125
stimulation duration	prob of reversal with turn_RIM::ChR2;AIB::TWK-18(gf)	confidence interval	prob of r with turn_RIM::ChR2	confidence interval		p value_x2 test	multi p value	lable
1s	0.16667	0.13336	0.43902	0.10741		0.00805655	0.0402828	*
3s	0.40476	0.14845	0.49524	0.09563		0.32072	1.6036	ns			p<0.05 *
5s	0.26667	0.15824	0.47191	0.10371		0.0488786	0.244393	ns			p<0.01 **
7s	0.16667	0.13336	0.5	0.11713		0.00182053	0.00910266	**			p<0.001 ***
12s	0.21875	0.14323	0.66216	0.10776		2.68939e-05	0.000134469	***			p<0.0001 ****
p value_x2 test
	stimulation duration	reversal with turn	reversal without turn	n	p	lable
RIM::ChR2;AIB::TWK-18(gf)	1s	5	25	30	0.00805655	*
	3s	17	25	42	0.32072	ns
	5s	8	22	30	0.0488786	*
	7s	5	25	30	0.00182053	**
	12s	7	25	32	2.68939e-05	***
RIM::ChR2	1s	36	46	82
	3s	52	53	105
	5s	42	47	89
	7s	35	35	70
	12s	49	25	74

## Sheet: 1s
Raw data for Figure 2 - figure supplement 1G (RIM::ChR2;AIB::TWK-18(gf))
worm name	note	r with omega turn	r without omega turn	omega turn following reversal	turn but not change direction
20160427w1			1
			0	1
			0	1
			1
			1
			0		1
			0	1
			1
			1
			0	1
			1
			1
			1
			1
20160427w4			1
	no res		1
			1
	no res		1
	no res		1
	no res		1
	no res		1
	no res		1
			1
	no res		1
			1
	no res		1
	no res		1
			1
	no res		1
	no res		1

## Sheet: 3s
worm name	note	r with omega turn	r without omega turn	omega turn following reversal	turn but not change direction
20160427w3			0	1
			0	1
	no res		1
			0	1
	no res		1
	no res		1
			1
			1
			1
			0	1
			1
			0	1
			1
			0	1
			0	1
			0	1
	no res		1
			1
20160427w2	no res		1
			0	1
			1
			1
		1	0
			1
			1
			1
			1
			0	1
			0	1
			1
			1
			1
			0	1
			0	1
			1
			1
			0	1
			1
			0	1
			0	1
			1
			1

## Sheet: 5s
worm name	note	r with omega turn	r without omega turn	omega turn following reversal	turn but not change direction
20160427w5			1
			1
			1
		1	0
			1
			1
		1	0
			0	1
			1
	no res		1
			1
		1	0
			1
			1
			1
	no res		1
20160427w6		1	0
		1	0
			1
		1	0
			1
			0	1
			1
			1
			1
			1
			1
			1
			1
			1

## Sheet: 7s
worm name	note	r with omega turn	r without omega turn	omega turn following reversal	turn but not change direction
20160419w1			1
			1
			1
			1
			1
			1
			1
			1
			1
		1	0
			1
			1
20160419w2			1
		1	0
			1
		1	0
			1
			1
			1
			0	1
			0	1
			1
			1
			1
			1
	no res		1
			1
			1
			1
			1

## Sheet: 12s
worm name	note	r with omega turn	r without omega turn	omega turn following reversal	turn but not change direction
20160427w7		1	0
		1	0
			1
			0		1
			0		1
			1
20160427w8			1
			1
20160427w8			1
			1
			1
			1
			1
			1
			1
			1
20160420w1			1
			1
			1
20160420w2			1
			1
			1
			1
			1
	no res		1
20160420w3		1	0
		1	0
			1
			1
			1
		1	0
			1
