# Supplementary material for: Flexible motor sequence generation during stereotyped escape responses
Source: eLife journal article supplement (doi:10.7554/elife.56942), 2020-06-05
Supplement: supp [file Figure 2-source data for Figure 2-figure supplement 1H-I.xlsx]

## Sheet: Pmec-4  ChR2；AIB  PH-miniSOG
Raw data for Figure 2 - figure supplement 1H-I
worm name	turn?	reversal duration time (s)	date	note
20180621 w1	1	5.936	20180621
	1	3.648
	1	5.641
	1	3.749
	1	5.148
	0	2.509
	0	0.983
	0	1.559
		0		stop
w2	1	2.482
	1	4.118
	0	1.074
	1	3.806								summary
	0	2.075
	0	1.286								state	n	%
	0	1.604								pause	4	0.012987
	0	1.08								%
		0		stop						no response	39	0.126623
		0		stop
										all	308
w3	1	4.133
	1	5.213
	0	1.696
	0	3.462
	0.5	5.45
	1	5.238
	0	4.649
	0	2.241
	0	1.498
	0	1.439
	0	0.69
w4	0	3.275
	1	5.295
	1	3.953
	1	4.361
	1	5.057
	1	3.316
	0	0.363
	1	6.248
	0	1.666
	0.5	4.921
	1	3.089
	0	1.498
	0	0.938
w5	0	5.199
	0	3.699
	1	5.189
	1	6.325
	0	1
w6		0		slow down
	0	2.149
	1	1.134
		0		slow down
		0		slow down
		0
		0		slow down
		0
w7	1	7.545
	1	7.447
	1
	1	4.189
	1	4.98
	1	7.034
	0	4.163
	0	2.603
	0	0.939
	0	1.944
		0		stop
	0	3.302
	1	14.034
	1	4.769
w8
	0	1.383
	1	1.187
	1	5.546
	1	2.27
w9	0	3.432
	1	4.618
	1	5.001
	1	4.461
	1	4.664
	0	5.007
	1	5.111
	1	5.375
	0	1.589
w10	1	5.622
	1	9.911
	1	5.738
	1	8.625
	1	0.907
	1	10.557
	1	9.866
	1	15.009
	0	0.274
w11	0	4.4
	1	5.137
	0	8.434
	1	6.319
	1	5.225
	1	5.636
	1	8.079
	1	9.558
20180309w1	1	6.167	20180309
	1	4.626
	1	3.865
	1	4.891
	1	5.834
	1	5.305
	1	5.562
	1	4.224
	1	4.329
	1	4.839
	1	5.228
	0	1.045
w2	0	4.291
	0	11.198
	0	8.095
w3	0	1.7
	0	1.217
	0	7.005
	0	1.483
	0	0.47
w5	0	0.621
	1	3.608
	1	4.421
	1	5.979
	0.5	4.93
	1	6.511
	0	0.318
	0	1.348
w6	0	8.79
	1	6.379
	0	7.54
	1	6.736
	0	8.351
	0.5	4.169
	1	5.526
	1	5.708
	0	4.93
w7	1	2.564
	1	1.196
	0	3.542
	0	1.559
	0	0.409
	0	4.724
	0	1.846
w8	1	5.313
	0	0.15
	1	4.386
	0	7.656
	0	1.044
	0	0.334
	0	8.433
	0	7.464
	0	0.591
w9	1	5.143
	1	4.859
	1	3.619
	0.5	5.193
	0	0.515
	0.5	4.86
	0	1.014
	0	0.62
	0	1.151
	0	0.44
	0	3.346
20180321w1	0	1.712	20180321	W1 don't move after first dlp
	0	1.58
	0	0.319
w2	1	4.9
		0
	0	0.655
	0	6.606
	0	4.375
	0	1.273
	0	2.417
	0	5.753
	0	2.252
w3	1	6.403
	1	6.969
	1	3.276
	1	6.329
	1	4.955
	0	4.904
	0	1.055
	0	4.522
	0	3.704
	0	2.907
w4	1	5.908
	1	6.705
	1	5.278
	0	8.655
	0	5.374
	1	6.445
	0	9.508
	0	9.89
		0
	0	4.012
	0	7.654
w5	0	3.83
	0	2.063
	0.5	3.683
	1	3.972
	1	4.285
	1	4.179
	0	3.997
	1	4.269
	1	6.989
w6	1	3.355
	1	4.098
	1	4.159
	1	4.891
	1	6.389
	1	6.298
	0	7.312
	0	0.575
	0	0.121
	0	0.666
	0	7.368
	0	1.168
	0	0.793
w7	1	3.947
	1	3.224
	1	4.943
	0	6.249
	0.5	3.955
	0	8.894
w8	1	3.476
	1	4.479
	1	4.87
	0	3.739
	1	4.907
	0	2.423
	0	2.372
	1	4.315
w9	0	0.59
	1	2.781
	1	4.722
	0	1.357
	1	4.902
	1	3.628
	1	4.795
	1	4.032
	0	7.573
w10	1	3.145
	1	4.163
	1	4.689
	1	3.367
	0	2.554
	0	3.416
	0	3.084
w11	1	5.467
	1	5.132
	0	3.648
	0	4.305
	0	7.313
	1	4.937
	1	4.289
w12	1	3.079
	1	2.144
	1	3.189
		0
	1	3.461
	0	0.856
	0	0.419
	1	4.573
	0	1.115
w13	1	1.699
	1	2.23
	0	3.131
	0	1.433
		0
	0	4.451
	0	0.419
	0.5	2.957
		0
w14	1	5.89
	1	6.529
	1	7.232
	1	4.446
	1	5.976
	1	5.886
