# Supplementary material for: Flexible motor sequence generation during stereotyped escape responses
Source: eLife journal article supplement (doi:10.7554/elife.56942), 2020-06-05
Supplement: supp [file Figure 2-source data for Figure 2D.xlsx]

## Sheet: Summary
for Fig 2D
	n	mean_reversal length	SEM		u-test	multi
AIB::chrimson no ATR	43	0.78667	0.13069
AIB::chrimson	64	5.24113	0.3022	****	3.4321e-17	6.8642e-17
	turn	no turn	turn rate		X2 test p-value	multi
AIB::chrimson no ATR	12	31	0.27907
AIB::chrimson	63	1	0.984375	****	5.60842e-15
	n	mean_reversal length	SEM		u-test	multi
WEN0127	49	2.13821	0.31389
QW373	284	2.75163	0.08128	***	0.000103296	0.000206592
	turn	no turn	turn rate		X2 test p-value	multi
WEN0127	1	66	0.0149254
QW373	129	155	0.454225	****	2.11328e-11	4.22656e-11	p<0.0001
WEN0127	pause	14	no response	4	all	67

## Sheet: AIB_Chrimson_no ATR
Raw data for Fig 2D
worm name	no response	reversal?	turn?	reversal+turn?	reversal length
20161120w1	1				0
	1				0
	1				0
	1				0
	1				0
w2		1			1.37774
				1	1.1355
				1	1.5897
	1				0
w3*				1	1.091
		1			2.967
	1				0
				1	1.55
		1			1.272
		1			0.392
	1				0
				1	1.846
	1				0
	1				0
		1			0.772
		1			0.999
w4*		1			1.076
		1			2.437
		1			0.999
	1				0
				1	0.894
				1	1.848
				1	1.423
				1	2.528
	1				0
				1	1.589
w5	1				0
	1				0
		1			1.34746
	1				0
				1	1.24148
		1			1.6654
	1				0
w6	1				0
	1				0
	1				0
	1				0
				1	1.78653

## Sheet: AIB_Chrimson
Raw data for Fig 2D
worm name	no response?	reversal?	turn?	reversal+turn?	reversal length
20161111w1				1	5.13248
				1	2.74035
				1	4.37547
				1	4.36033
w2				1	10.0379
				1	2.86147
				1	6.25284
				1	7.35806
				1	6.32854
				1	7.58516
				1	6.52536
w3				1	3.36109
				1	5.79864
				1	4.90537
				1	4.89023
		1			7.2218
				1	6.90386
				1	3.52763
				1	5.29902
				1	4.85995
				1	6.47994
w4				1	5.1022
				1	3.78501
				1	4.54201
				1	2.99773
				1	3.92127
				1	7.0704
				1	5.2536
				1	4.42089
				1	3.89099
				1	2.64951
20170911w1				1	1.654
				1	3.902
				1	4.331
				1	4.158
				1	4.079
				1	6.54
				1	7.288
				1	8.206
				1	6.217
				1	4.624
w2				0.5+0.5+1	1.818
				0.5+1	1.816
				0.5+1	2.286
				0.5+1	2.413
				1	9.355
				1	11.383
w3				0.5+1	1.918
				1	3.231
				1	4.325
				1	5.957
				1	6.722
				1	9.064
				1	12.505
				1	8.569
w4				1	2.522
				1	3.559
				1	3.458
				1	0.465
				1	6.297
				1	7.781
				1	3.937
				1	6.74
				1	7.873

## Sheet: QW373_ALM AVM  ChR2
Raw data for Fig 2D
worm name	OMEGA TURN ?	reversal time duration (s)
W1_20160719	y	3.10448
	y	3.59701
	y	4.70149
	n	3.20896
	n	3.19403
w2	n	2.62687
	y	2
w4	y	1
	y	2.0597
W1_20160720	n	3.20896
	y	3.9403
	y	3.83582
	n	3.29851
	n	2.98507
	n	2.70149
	n	3.91045
	n	1.85075
	n	3.64179
	n	4.1791
	n	1.70149
	n	2.07463
	n	4.73134
	n	1.86567
	n	5.14925
	n	1.10448
	n	1.34328
w2	n	1.10448
w4	y	3.23881
	y	3.19403
	n	1.91045
	n	2.76119
	y	3.25373
	n	1.34328
	n	0.835821
	n	3.44776
	n	0.940299
	y	4.95522
	n	1
	n	3.44776
	n	1.16418
	y	1.22388
	n	4.61194
W5	n	3.1194
	n	3.92537
	n	3.97015
	y	3.1791
	y	5.22388
	y	5.37313
	y	4.68657
	n	1.23881
	n	3.35821
	n	1.20896
w6	y	3.08955
w7	y	4.35821
	y	4.65672
	y	5.49254
	y	3.97015
	n	3.70149
	n	3.13433
	n	3.83582
	n	3.25373
	n	1.79104
	y	3.89552
	n	1.86567
w8	y	3.68657
	n	2.16418
	n	1.62687
	y	2.89552
w9	y	2.31343
	n	1.23881
	y	3.76119
	y	5.26866
	n	2.29851
	y	3.89552
	n	2.46269
	n	1.77612
	y	5.35821
	y	0.641791
	n	1.14925
w10	n	2
	n	3.58209
	n	1.74627
	n	4.31343
	n	1
	n	4.31343
	n	1.25373
	n	0.925373
w11	n	3.44776
	n	2.46269
	n	2.50746
	n	3.71642
	y	3.10448
	n	2.8209
	n	2.31343
	n	2.85075
	n	3.58209
w12	n	2.71642
w1_20160728	y	2.76119
w2	y	3.32836
	n	0.671642
	y	3.79104
	n	4.64179
	y	4.16418
	n	3.46269
	n	1.10448
	n	1.53731
	n	0.298507
w3	y	4.80597
	n	1.1791
	n	3.31343
	y	5.35821
	y	4.58209
	y	3.83582
w1_20160801	n	5.22388
	n	1.62687
	n	1.38806
w2	y	2.77612
	y	2.97015
	n	3.77612
	n	3.07463
	y	3.62687
	n	1.62687
	y	4.53731
	n	0.80597
	y	6.47761
	y	4.83582
	y	5.73134
	n	1.52239
	y	1.59701
	n	1.59701
	n	1.20896
w3	y	3.97015
	n	1.0597
w4	y	1.35821
w5	n	1.76119
	y	4.43284
	y	4.0597
	n	1.53731
	n	4.85075
	y	4.67164
	n	1.80597
	y	4.41791
	y	1.47761
	y	5.0597
	n	1.02985
w6	y	3
	n	3.95522
	y	3.50746
	y	3.79104
	y	2.34328
	y	2.97015
	y	6.62687
	y	2.9403
	n	3.70149
	y	3.44776
	n	3.20896
	y	3.1791
w7	n	1.64179
	n	2.1194
	y	5.86567
	n	3.53731
w9	n	1.28358
w10	y	3.80597
	n	0.223881
W11	y	4.23881
	n	1.50746
	n	1.23881
	n	0.58209
	n	0.283582
W12	n	0.626866
	y	1.86567
	y	1.19403
	y	3.1791
	y	5.97015
W13	n	4.29851
	n	1.04478
	n	1.47761
	n	1.26866
	n	0.41791
	n	0.537313
	n	1.55224
	n	0.597015
W14	y	4.07463
	n	1.28358
	y	5.43284
	n	0.776119
	n	1.29851
	n	1.01493
	y	4.07463
	n	1.22388
	n	0.567164
	n	0.238806
	y	3.62687
	n	0.373134
	n	0.447761
	n	0.552239
W1_20160802	y	2.52239
	n	2.95522
	n	1.35821
W2	y	2.25373
	y	3.32836
	y	3.40299
	y	2.8209
	n	2.0597
	y	3.47761
	y	2.74627
	n	1.22388
	y	3.8806
	y	1.73134
	y	1.83582
	y	2.97015
	n	1.56716
	n	2.56716
	y	1.77612
	n	1.34328
w3	y	1.64179
w4	n	2.74627
	y	1.41791
w5	n	4.14925
	y	3.9403
	n	0.865672
	n	2.20896
	n	1.29851
	y	3.10448
w6	y	2.83582
	n	2.50746
	y	2.25373
	y	2.35821
	y	2.38806
	n	2.07463
	n	1.85075
	y	2.67164
	y	3.23881
	y	4.26866
	n	2.95522
	y	2.67164
	n	3.83582
	y	3.31343
	y	2.98507
	y	3.31343
	n	3.71642
	n	2.08955
	n	1.38806
	y	3.8209
W7	y	4.32836
	n	1.38806
	y	3.26866
	y	3.1791
	y	4.74627
	n	1.52239
	y	2.77612
	y	3.98507
	y	2.26866
	y	2.67164
W8	y	2.59701
	y	2.02985
	y	1.32836
W9	y	1.74627
	y	4.79104
	n	2.28358
	n	2.1194
	y	3.01493
W10	n	3.04478
	y	4.01493
	y	3.58209
W11	y	3.44776
	y	3.80597
	n	3.43284
	y	2.8209
	y	3.16418
	n	2.68657
	n	3.92537
	n	1.04478
	n	2.49254
	y	3.56716
	y	3.28358
	y	2.9403
	n	1.0597
	y	3.40299
w12	y	5.8209
	n	1.08955
	n	1.1194
	n	0.970149
	n	1.25373

## Sheet: WEN0127_ALM AVM  ChR2;AIB  Arch
Raw data for Fig 2D
worm name	note	date	turn	reversal length_from yaml		frame
w1		20170216	0	7.948
			0	0.635
			0	0.635
			0	6.95
	pause
			0	4.843
			0	4.634
	0
W2			0	2.089
			0	1.696
			0	2.084
W3			0	2.701
			1	5.238
			0	0.757
			0	6.122
			0	0.197
			0	1.716
			0	1.226
			0	0.605
			0	1.513
	pause
W4	0
			0	0.378
			0	9.597
			0	0.226
	0
	0
W7			0	0.859
			0	0.47
			0	0.304
			0	0.697
			0	1.454
			0	1.498
			0	0.469
W8			0	1.83056
			0	1.61876
			0	4.44781
			0	5.24962
				5.24962
W9	pause
	pause
			0	0.3177
	pause
	pause
	pause
W10			0	1.92133
			0	2.49622
			0	1.25567
			0	1.64902
			0	0.272315
			0	0.801815
	pause
	pause
W11			0	1.54312
			0	1.67927
			0	1.1649
	pause
			0	1.059
	pause
	pause
	pause
W16			0	1.28593
			0	1.39183
			0	0.514372
			0	0.953101
				0.529501
	pause
