# Supplementary material for: Flexible motor sequence generation during stereotyped escape responses
Source: eLife journal article supplement (doi:10.7554/elife.56942), 2020-06-05
Supplement: supp [file Figure 2-source data for Figure 2E-F.xlsx]

## Sheet: Summary
for Fig 2E-F (Pmec-4_ChR2+Pnpr-9_TWK-18)
worm		n
Pmec-4+Pnpr-9-twk-18	turn	136
	no turn	196		χ2 test P VALUE
Pmec-4	turn	322		0.0413822
	no turn	352
		n		n		n		n
Pmec-4+Pnpr-9-twk-18	no response	70	response	227	PAUSE	35	all	332
Pmec-4	no response	79	response	594	PAUSE	1	all	674
		n		n
Pmec-4+Pnpr-9-twk-18	no response	70	response	262		χ2 test P VALUE
Pmec-4		79		595		8.44695e-05
		n		n
Pmec-4+Pnpr-9-twk-18	pause	35	not pause	297		χ2 test P VALUE
Pmec-4	pause	1	not pause	673		7.11108e-17

## Sheet: qw373+Pnpr-9-twk-18
Raw data for Fig 2E-F
worm name	turn?	duration time (s)	date	note
20191030w1	1	2.771	20180723
	1	3.619
	1	4.421
	1	2.739
	1	4.769
	1	3.952
	1	4.346
	1	4.632
	0	1.257
	0	1.543
w2	1	3.074
	1	4.769
	0	1.923
	1	3.314
	1	5.298
	1	2.484
	1	6.419
	1	4.557
	0	7.586
		0		stop
	0	3.316
w3	1	2.846
	1	2.952
	1	3.18
	1	4.104
	0.5	3.996
	0.5	3.786
	0	4.375
	1	4.589
	0	1.318
		0		stop
	1	2.786
	0	0.379
	0	4.133
w4	1	2.876
	0.5	4.285
	0	3.588
	0.5	8.101
	0	0.227
	1	13.549
		0		stop
w5	1	2.044
	0	2.104
	1	2.938
	1	3.058
	1	2.029
	1	3.906
		0		slow down
w6		0		slow down
	0	0.741
		0		slow down
		0		slow down
w7	0	1.71
		0		slow down
	0	0.958
	0	0.757
	0	1.334
	0	0.817
		0		stop
w8	0	0.786
	0	1.074
		0		slow down
		0		slow down
w9	0	0.696
	0	1.12
		0		slow down
	0.5	2.982
		0		slow down
		0		stop
	1	1.967
		0		slow down
	1	3.589
		0		slow down
	1	2.164
		0		slow down
w10	1	1.65
	1	2.392
	0	1.74
	1	5.132
	1	1.257
		0		stop
	0	2.135
		0		slow down
w11	0	2.331
	0	2.557
		0		stop
		0		slow down
	0	3.498
		0		stop
		0		stop
		0		stop
		0		slow down
		0		slow dowm
	0.5	4.572
	1	11.568
		0		slow down
		0		slow down
w12	1	3.123
	1	3.119
	1	1.529
	1	2.497
	1	1.076
	1	1.544
	1	2.468
	0	0.666
	1	2.224
		0		stop
	1	2.8
		0		slow down
		0		stop
w13	0	1.833
	1	1.56
		0		slow down
	1	4.452
	1	7.055
		0		stop
	1	4.103
	0	0.577
		0		stop
20191108w1	1	3.618
	1	3.467
	1	4.087
	1	3.013
	1	3.362
	1	3.799
	0	2.725
	0	1.969
w2
	0	1.196
		0		slow down
		0		slow down
	0	0.847
	0	4.511
	0	0.364
		0		stop
	0	0.469
		0		slow down
		0		slow down
	0	3.588
		0		slow down
	0	0.589
w3	0	2.922
	0	2.908
	0	3.239
	0.5	3.785
	0	2.755
	0	4.315
	1	4.164
	1	3.618
	1	4.058
	1	3.33
	1	2.058
	1	2.559
	0	3.496
		0		stop
	1	2.709
w4		0		slow down
	0	3.199
		0		slow down
		0		stop
	1	3.074
	0	0.894
		0		slow down
	1	3.958
		0		stop
		0		stop
w5	0	1.909
	1	1.469
	0	1.726
	1	1.529
	1	2.966
	1	1.912
	1	2.696
w6
		0		slow down
	0	1.818
	0	0.97
	1	2.18
	0	2.075
	1	2.786
		0		slow down
		0		stop
		0		stop
w7	0	1.529
	0	1.484
	0	2.378
	0	2.816
	0	0.847
	1	3.24
		0		slow down
		0		slow down
	0	0.757
		0		slow down
		0		stop
	1	1.166
	0	1.106
		0		stop
		0		slow down
w8	1	2.953
	1	2.544
	1	3.239
	0	2.306
	1	3.572
	1	4.724
	1	4.526
	1	3.166
	1	2.649
	1	3.921
	0	1.137
	1	4.935
w9	1	2.347
	1	2.361
	1	3.361
	1	2.968
	1	2.073
	1	3.073
	1	3.012
	0	1.182
	1	3.634
	1	2.483
		0		slow down
	0	1.334
w10	0	1.876
	0	2.286
	0	2.514
	1	2.406
		0		slow down
	0	2.286
	0	1.591
		0		stop
	1	2.318
w11		0		slow down
	0	3.059
	0	0.365
		0		slow down
		0		slow down
		0		stop
		0		stop
	1	4.027
		0		stop
		0		stop
	1	3.831
w12	0	2.801
	1	3.163
	0	4.649
	1	3.336
	1	3.649
	0	3.754
	1	3.592
	1	5.086
	1	3.164
	1	4.572
	0	3.286
	0	4.118
	0	6.147
w13	0	2.679
	1	2.862
	1	3.604
	0.5	2.073
	1	3.315
	0.5	3.226
	1	3.422
w14	0	1.891
	0	2.498
	0	2.044
	1	2.452
	1	3.3
	1	2.785
	1	3.362
	1	3.058
	1	3.315
	0	2.786
	0	1.863
	0	1.303
	0.5	3.663
	1	4.057
	1	3.422
	0	1.046
		0		stop
w15	0	2.166
	1	3.148
	1	3.422
	1	2.892
	1	1.985
	1	4.466
	1	2.922
	1	2.83
	1	2.483
	1	3.981
	0	0.411
	0	5.541
		0		stop
w16		0		slow down
	0	1.137
		0		slow down
	0	0.455
	0	0.727
		0		stop
		0		stop
	0	0.332
		0		stop
		0		slow down
		0		stop
	1	4.784
	1	5.072
		0		slow down
		0		stop
