# Supplementary material for: Flexible motor sequence generation during stereotyped escape responses
Source: eLife journal article supplement (doi:10.7554/elife.56942), 2020-06-05
Supplement: supp [file Figure 3-source data for Figure 3D.xlsx]

## Sheet: Summary
												* p<0.05/n
for Figure 3D												** p<0.001
												*** p<0.0001
												**** p<0.00001
worm name	n_all	n_turn	turn rate	p-value		lower confidence limit	upper confidence limit
WEN0851(WEN0119 cross out )	53	52	0.981132			0.924007	0.999643
WEN0119(inx-1;AIB::Chrimson)	83	50	0.60241	1.83111e-06	****	0.489026	0.708263
inx-1 rescue	68	66	0.970588	2.74024e-07	****	0.897759	0.996418	compare with WEN0119

## Sheet: WEN0851_Pnpr-9  Chrimson
Raw data for Figure 3D
worm name	turn	reversal duration	note
20190524w1	1	2.967	WEN0119*N2 cross out
	1	3.967
	1	4.33
	1	7.101
	1	3.225
	1	7
	1	4.058
	0	7.962
w2	1	3.467
	1	6.117
	1	6.918
	1	1.197
	1	7.318
w3	1	3.072
	1	2.756
	1	8.813
	1	11.823
	1	3.361
w4	1	1.437
	1	3.346
	1	4.271
	1	5.966
	1	9.174
	1	8.433
	1	9.16
w5	1	2.771
	1	2.559
	1	4.029
	1	5.691
	1	5.238
	1	7.358
	1	4.86
w6	1	1.846
	1	2.211
	1	3.299
	1	3.208
	1	4.467
	1	7.632
	1	8.721
w7	1	3.074
	1	7.312
w8	1	3.982
	1	3.436
	1	5.647
	1	6.464
	1	7.811
	1	2.564
	1	7.796
w9	1	5.768
	1	7.811
	1	3.906
	1	8.266
	1	6.752

## Sheet: WEN0119_inx-1;Pnpr-9  Chrimson
worm name	reversal length	turn
20161208 w1*	2.952	1
	4.163	1
	3.528	1
	3.941	1
	5.116	1
	3.396	0
	4.868	1
	6.101	0
	5.617	1
	4.639	0
	4.634	1
	6.933	0
w2	1.818	1
	2.113	1
w2	5.586	1
	5.441	1
	5.951	1
	5.995	1
	2.998	1
	5.219	1
	6.399	1
w3	3.11885	0
	4.05753	0
	5.34444	1
	6.11658	0
	9.19001	0
	5.95004	1
	5.7078	1
	4.98107	1
	4.61771	0
	5.87434	1
	4.20893	0
	7.20666	1
	5.3293	1
	7.16124	0
	5.07192	0
	7.04012	1
w4	5.69266	1
	7.23694	1
	3.22483	1
	5.60182	1
w5	4.29977	1
	3.73959	0
	2.86147	0
	2.83119	1
	5.405	0
	5.91976	1
	4.34519	0
	4.66313	0
	6.26798	1
	5.37472	1
	4.23921	1
	3.70931	0
	0.893263	0
	5.76836	0
w6	6.14686	1
	3.05829	1
	5.1022	1
	2.37699	1
	4.55715	0
	6.96442	0
	7.70628	0
w7*	2.83	1
	3.301	0
	3.133	1
	1.546	0
	3.543	0
	2.164	1
	2.408	0
	6.435	0
	2.77	1
	2.134	0
w8	6.37396	1
	5.04164	1
	6.6162	1
	7.38834	0
	6.35882	1
	6.17714	1
	7.78198	1
	7.87282	0
	7.41862	0
	6.72218	1
	7.79712	0

## Sheet: inx-1 rescue
worm name	reversal duration	turn
20180515w1	3.043	1
	5.129	1
	1.661	1
	4.36	1
	5.555	1
	5.738	0
w2	2.842	1
	1.287	1
	3.466	1
	1.529	1
	2.21	1
	2.196	1
	2.129	1
	3.589	1
	2.871	1
	3.299	1
	3.906	1
w3	2.2	1
	1.907	1
	2.543	1
	2.224	1
	3.209	1
	3.845	1
	3.13	1
	4.209	1
	2.211	1
	3.437	1
	2.451	1
w4	2.288	1
	3.244	1
	1.558	1
	1.196	1
	3.547	1
	3.584	1
	2.21	1
	3.315	1
	4.245	1
	1.952	1
w6	1.8	1
	2.488	1
	2.679	1
	2.947	1
	3.638	1
	3.125	1
	4.512	1
	2.983	1
	3.382	1
	3.89	1
w7	2.741	1
	2.392	1
	2.968	1
	1.77	1
	2.499	1
	2.724	1
	1.498	1
	3.377	1
	3.709	1
	3.387	1
w8	2.477	1
	1.485	0
	1.816	1
	3.269	1
	2.514	1
	1.483	1
	2.237	1
	2.637	1
	3.266	1
	5.712	1
