# Supplementary material for: Flexible motor sequence generation during stereotyped escape responses
Source: eLife journal article supplement (doi:10.7554/elife.56942), 2020-06-05
Supplement: supp [file Figure 4-source data for Figure 4-figure supplement 1B.xlsx]

## Sheet: Summary
For Figure 4 - figure supplement 1B
worm	n	reversal length(frames)	sem	sig	p-value of U-test	multi p-value	lable		turn num	noturn num	turn rate	p-value of x2 test
AIB::chrimson no ATR	43	0.78667	0.13069						12		0.27907
AIB::chrimson	64	5.24113	0.3022	****	3.4321e-17		****		63		0.984375	5.60842e-15
														date
AIB::chrimson	64	5.24113	0.3022						63	1	0.984375
eat-4(ky5)	63	1.612	0.32195	****	5.7874e-13	7.52362e-12	****		60		0.952381													mt6308+0074(1)
eat-4(ky5)+AIB::eat-4	67	3.5727	0.23198	****	6.4012e-08	8.32156e-07	****	compare with eat-4(ky5)	65	2	0.970149			20180119
eat-4(ad572)	52	2.50414	0.13169	****	1.2874e-11	1.67362e-10	****		52	0	1													da572+0074
eat-4(ad572)+AIB::eat-4	90	3.9435	0.18479	****	1.4799e-07	1.92387e-06	****	compare with eat-4(ad572)	89	1	0.988889			20170830
eat-4(ad819)	115	3.27212	0.25066	****	6.1342e-06	7.97446e-05	****		110	5	0.956522													da819+0074
eat-4(ad819)+AIB::eat-4	34	4.4182	0.45393	*	0.053	0.689	ns	compare with eat-4(ad819)	33	1	0.970588			20180119
avr-14(ad1302))	44	4.95018	0.3817	ns	0.6038	7.8494	ns		42	2	0.954545													st1724
avr-15(ad1051)	105	4.0866	0.18905	**	0.0014	0.0182	*		99	6	0.942857													st152
glc-1(nl704)	233	4.4171	0.1304	ns	0.0128	0.1664	ns		229	4	0.982833
avr-14,avr-15(1)	41	4.1772	0.28075	ns	0.0234	0.3042	ns
avr-14,avr-15(2)	55	3.7352	0.31314	**	0.00045741	0.00594633	**
avr-15,glc-1	25	3.56776	0.29667	*	0.00086222	0.0112089	*
avr-14,glc-1	94	5.63243	0.22541	ns	0.2653	3.4489	ns

## Sheet: AIB_Chrimson_no ATR
Raw data for Figure 4 - figure supplement 1B
worm name	no response	reversal	turn	reversal+turn	reversal length
20161120w1	1				0
	1				0
	1				0
	1				0
	1				0
w2		1			1.37774
				1	1.1355
				1	1.5897
	1				0
w3*				1	1.091
		1			2.967
	1				0
				1	1.55
		1			1.272
		1			0.392
	1				0
				1	1.846
	1				0
	1				0
		1			0.772
		1			0.999
w4*		1			1.076
		1			2.437
		1			0.999
	1				0
				1	0.894
				1	1.848
				1	1.423
				1	2.528
	1				0
				1	1.589
w5	1				0
	1				0
		1			1.34746
	1				0
				1	1.24148
		1			1.6654
	1				0
w6	1				0
	1				0
	1				0
	1				0
				1	1.78653

## Sheet: AIB_Chrimson
worm name	no response	reversal	turn	reversal+turn	reversal length
20161111w1				1	5.13248
				1	2.74035
				1	4.37547
				1	4.36033
w2				1	10.0379
				1	2.86147
				1	6.25284
				1	7.35806
				1	6.32854
				1	7.58516
				1	6.52536
w3				1	3.36109
				1	5.79864
				1	4.90537
				1	4.89023
		1			7.2218
				1	6.90386
				1	3.52763
				1	5.29902
				1	4.85995
				1	6.47994
w4				1	5.1022
				1	3.78501
				1	4.54201
				1	2.99773
				1	3.92127
				1	7.0704
				1	5.2536
				1	4.42089
				1	3.89099
				1	2.64951
20170911w1				1	1.654
				1	3.902
				1	4.331
				1	4.158
				1	4.079
				1	6.54
				1	7.288
				1	8.206
				1	6.217
				1	4.624
w2				0.5+0.5+1	1.818
				0.5+1	1.816
				0.5+1	2.286
				0.5+1	2.413
				1	9.355
				1	11.383
w3				0.5+1	1.918
				1	3.231
				1	4.325
				1	5.957
				1	6.722
				1	9.064
				1	12.505
				1	8.569
w4				1	2.522
				1	3.559
				1	3.458
				1	0.465
				1	6.297
				1	7.781
				1	3.937
				1	6.74
				1	7.873

## Sheet: WEN0599 eat-4(ky5)+AIB_Chrimson
worm name	turn	reversal duration	note
20171125w1	1	8.156	slow down or reversal and turn
	1	8.863
	1	8.821
	1	3.593
	1	7.861
	1	2.019
	1	6.924
	1	8.387
	1	2.008
	1	3.41
w2	3	0	bend
	2	0	bend
	2	0
	2	0	bend
	2	0
	1	0
	1	0
	2	0
	2	0
	2	0
w3	2	0	bend
	1	0
	1	0
	2	0
	2	0	bend
	1	0
	2	0
	1	0	bend
	2	0
	2	0
w4	2	0
	0	3.154
	0	2.668
	2	3.113
	1	3.895
	1	4.007
	2	3.877
	3	0
	0	4.238
	1	3.049
W5	1	0
	1	0
	1	3.331
w6	1	0	bend
	1	0	bend
	1	0	bend
	1	0
w7	2	0
	2	0
	2	0
	3	0
	3	0
	2	0
	2	0
	3	0
	2	0
w8	2	1.675
	2	2.222
	2	1.575
	2	1.98
	0.5+1	0
	2	2.73
	2	0

## Sheet: WEN0599+Pnpr-9_eat-4
worm name	reversal duration	turn
20180119w1	2.009	1
	0	0.5+1
	2.135	2
	0	1
	0	2
	0	3
	0	2
w2	3.244	1
	3.235	1
	4.265	1
	4.693	1
	3.694	1
w3	2.009	2
	4.22	1
	5.093	1
	3.73	1
	5.061	1
	7.765	0
	7.868	1
w4	1.771	3
	2.619	1
	1.873	2
	2.33	1
	6.57	1
	6.409	0
	3.205	1
w5	1.891	2
	3.154	1
	2.967	2
	2.557	1
	5.191	1
	6.031	1
	7.661	1
w6	1.853	2
	1.953	2
	2.248	2
	2.937	2
	3.276	1
	2.907	1
	5.471	1
	2.589	1
w8	2.826	2
	1.408	1
	2.352	1
	3.867	1
	3.36	1
	4.274	1
w7	3.206	2
	3.214	1
	4.128	1
	5.265	1
	4.299	1
w9	3.023	1
	4.152	1
	6.117	1
	4.894	1
	6.721	1
	3.517	1
	3.194	1
	2.785	1
w10	2.896	2
	2.726	2
	2.583	1
	4.506	1
	4.068	1
	5.891	1
	7.616	1

## Sheet: WEN0132 DA572+AIB_Chrimson
worm name	turn	reversal length
20161121w1	2	1.71083
	3	1.09008
	2	2.75549
	1	3.13399
	2	1.31718
	1	3.51249
	1	2.37699
	1	2.52839
	1	1.68055
	2	3.16427
w2*	2	2.984
	2	3.149
	3	1.313
	1	1.07
	2	2.544
	1	2.221
	2	1.574
	2	1.534
	2	2.361
w3*	2	0.801
	2	1.677
	2	2.242
	1	2.755
	1	2.346
	1	2.291
	2	2.716
	1	5.02
	1	2.498
	1	3.366
w4	3	2.33157
	2	1.4383
	1	3.19455
	2	1.48372
	2	1.19606
	2	1.63512
	2	1.69569
w5	1	3.20969
	2	1.87737
	2	2.64951
	3	1.98335
	1	2.83119
	2	2.58895
	1	3.51249
	1	4.48145
	1	4.16351
	1	1.98335
	1	3.83043
	1	3.25511
	2	2.30129
	1	2.99773
	1	4.52687
	2	3.31567

## Sheet: WEN0132+Pnpr-9_eat-4
worm name	no response	reversal	turn	reversal+turn	reversal length_
20170830w1				2	2.726
				2	3.714
				1	3.532
				1	4.784
				1	4.218
				1	3.654
				1	5.127
				1	3.432
w2				1	1.796
				2	2.301
				1	3.25
				1	3.503
				1	3.815
				1	5.146
				1	2.791
				1	2.503
w3				2	1.414
				1	2.181
				1	4.218
				1	4.744
				1	2.018
				2	2.322
				1	4.138
				1	3.471
				1	3.594
				1	4.099
w4				1	0.869
				2	1.817
				2	1.715
				1	3.068
				2	1.192
				1	3.714
				1	5.925
				1	2.926
				1	3.341
				2	3.533
w5				2	3.189
				2	2.261
				2	3.714
				1	4.41
				1	4.937
				1	7.308
				1	7.611
				1	7.308
				1	5.734
				1	5.269
w6				2	2.381
				1	4.3
				1	1.554
				1	2.603
				1	6.359
				1	4.281
				1	3.957
				1	4.279
				1	5.254
				1	2.826
w7				2	2.34
				1	3.376
				1	2.562
				1	3.332
				1	4.442
				1	8.156
				1	6.077
				1	7.52
				1	5.168
w8				2	2.786
				2	1.715
				2	3.048
				1	4.199
				1	4.209
				1	5.481
				2	3.05
				1	3.33
				1	4.524
				2	2.906
				1	3.574
w9				1	7.469
				1	7.19
				1	8.222
				1	7.669
		1			7.995
w10				2	2.808
				1	2.623
				1	1.634
				1	2.63
				1	3.029
				0.5	2.079
				1	4.461
				1	4.139
				1	5.046

## Sheet: WEN0607 DA819+AIB_Chrimson
worm name	turn	reversal duration
20171108w1	1	0
	1	2.306
	1	4.467
	1	0
	1	3.774
	1	4.38
	0	3.915
	1	0
	1	6.742
	1	8.379
	1	3.653
	0	6.62
w2	1	3.694
	2	3.692
	1	3.78
	1	3.815
	0.5+1	2.897
	1	3.694
	1	4.016
w3	1	3.25
	1	9.15
	1	4.411
	1	4.472
w4	1	0
	1	3.351
	1	6.499
	1	0
w5	2	0
	1	4.582
	3	0
	1	4.924
	1	3.673
	2	0
	1	0
	1	7.277
	1	0
w6	2	2.06
	2	0
	1	0
	1	4.502
	1	0
	1	0
w7	1	2.462
	1	4.622
	1	5.533
	1	5.148
	1	8.459
	1	7.74
	1	7.651
	1	5.55
w8	2	3.494
	1	4.103
	2	3.854
	1	3.269
	0.5	4.875
	1	7.498
	1	8.639
	1	9.255
20171125w1	1	0
	2	0
	2	0
	1	3.572
	1	0
	1	9.721
w2	2	1.676
	2	2.428
	1	1.818
	2	2.362
	1	2.18
	1	1.796
	1	1.213
w3	3	1.434
	3	0
	3	1.958
	2	2.947
	2	2.503
	2	1.555
	1	5.815
	1	2.593
w4	1	2.484
	1	2.584
	1	5.633
	2	1.454
	1	4.854
	0.5+1	0
	1	4.909
	1	7.528
	1	8.529
	0.5+1	0
w5	3	0
	2	1.232
	1	4.003
	1	4.644
	0	4.622
w6	3	0
	2	0
	1	4.036
	1	5.95
	1	6.327
	0	6.68
	1	3.936
w7	1	0
	2	2.988
	1	2.891
	1	2.826
	1	5.57
	1	3.937
	1	6.317
	0.5+1	0
w8	3	0
	3	0
	2	0
	0	6.662
	3	0
	3	0

## Sheet: WEN0607+Pnpr-9_eat-4
worm name	reversal duration	turn
20180119w1	3.592	1
	3.605	1
	5.981	1
	4.466	1
w2	2.237	1
	3.598	1
	9.403	1
w3	1.6	2
	1.492	0
	2.851	1
	5.406	1
	6.969	1
	11.942	1
w4	2.438	3
	3.271	2
	3.058	1
	4.754	1
	3.048	1
	4.421	1
w5	1.902	2
	3.119	1
	7.099	1
	3.623	1
	4.639	1
20180202w1	7.676	1
	7.473	1
	4.879	1
	8.262	1
w2	0	1
	2.958	1
	0	1
	2.134	1
	7.085	1
	5.238	1

## Sheet: avr-14+AIB_Chrimson
worm name	no response	reversal	turn	reversal+turn	reversal length_s
20161215w1*				1	6.565
		1			2.216
				1	3.397
				1	7.923
				1	7.57
				1	4.869
				1	5.634
				1	7.964
				1	2.907
				1	8.267
			2	1	0.726
				1	4.979
				1	5.899
				1	4.633
w2				1	8.82665
				1	7.16124
				1	7.43376
				1	9.09917
				1	9.20515
				1	9.81075
				1	10.6283
		1			1.42316
w3*				1	2.529
			2	1	1.181
				1	4.225
				1	3.271
				1	1.459
				0.5	3.436
				0.5	2.105
			2	0.5	1.301
				1	3.951
				1	3.209
				1	4.511
w4				1	3.87585
				1	2.98259
				1	4.64799
				1	4.84481
				1	5.28388
				1	4.90537
				1	4.70855
				1	5.49584
				1	4.92051
				1	5.11734
				1	2.71007

[truncated: 6 more sheets: avr-15+AIB_Chrimson, glc-1+AIB_Chrimson, avr-14,avr-15+AIB_Chrimson(1), avr-14,avr-15+AIB_Chrimson(2), glc-1,avr-15+AIB_Chrimson, avr-14,glc-1+AIB_Chrimson]
