# Supplementary material for: Flexible motor sequence generation during stereotyped escape responses
Source: eLife journal article supplement (doi:10.7554/elife.56942), 2020-06-05
Supplement: supp [file Figure 4-source data for Figure 4-figure supplement 2B.xlsx]

## Sheet: AIB  Chrimson;AIB  GCaMP6
165.749	170.436	165.325	129.946	180.989	150.818	179.37	171.362	160.292	154.627	154.369	139.182	182.172	154.03	202.285	198.479	149.825	173.446	142.258	190.211	185.875
167.519	170.78	166.837	130.657	180.638	151.38	179.547	172.52	160.281	154.865	154.21	139.526	180.992	155.817	203.599	199.381	151.042	177.455	143.128	190.806	185.618
168.514	170.02	166.219	130.762	183.741	151.073	180.035	174.152	160.913	155.143	154.303	140.168	182.873	154.522	203.022	199.22	151.149	177.018	144.251	189.756	185.938
168.863	169.971	166.632	130.079	183.064	152.226	179.654	173.88	161.664	154.2	154.71	139.778	182.713	155.075	202.7	199.473	150.209	178.897	143.39	188.96	186.1
169.721	170.238	166.825	130.978	180.531	151.26	179.994	173.312	160.985	154.035	154.215	141.217	182.513	155.478	203.754	199.1	150.366	177.845	143.587	190.401	185.539
168.455	169.774	166.75	129.99	182.554	151.07	180.191	173.458	160.6	153.644	153.851	140.316	184.295	155.517	203.223	198.533	150.054	175.13	144.019	189.355	186.279
169.375	170.931	166.619	129.872	183.124	150.875	181.467	173.119	161.421	153.801	153.87	140.104	183.54	153.362	204.174	198.92	150.997	177.039	143.681	190.207	185.75
167.959	170.38	167.465	129.976	184.634	150.795	181.543	173.141	161.279	154.862	155.141	139.98	180.864	152.665	204.848	200.446	151.065	176.748	142.859	190.264	186.649
169.515	168.158	166.485	129.437	183.507	151.267	180.556	173.974	159.862	154.464	155.332	140.324	183.522	153.468	203.094	198.423	151.336	177.159	143.594	191.943	186.996
168.567	168.434	165.234	130.182	182.41	152.883	180.688	173.941	160.413	154.814	154.759	140.865	183.59	153.447	205.009	199.55	150.673	178.606	143.517	190.36	186.213
168.162	169.883	167.454	130.062	182.872	153.002	180.792	174.02	159.162	155.134	153.779	140.644	182.625	155.163	204.033	199.397	150.538	178.122	142.942	191.314	187.248
169.112	170.139	167.603	130.061	181.138	152.638	180.422	174.301	159.092	154.863	155.077	140.727	179.708	155.528	205.011	199.106	149.888	178.663	142.341	190.326	187.403
168.113	171.102	165.671	129.996	182.236	151.957	180.286	174.84	160.485	155.303	154.271	140.896	181.301	155.521	204.504	199.605	150.881	179.056	143.503	190.144	188.563
169.442	170.328	169.921	130.282	184.182	152.534	181.139	174.328	160.656	154.657	155.24	140.551	180.852	154.209	204.913	199.788	151.596	178.37	142.24	190.225	188.734
168.379	169.441	168.052	130.709	183.117	152.63	182.077	174.413	160.035	155.523	154.433	140.598	180.107	153.78	205.376	198.461	150.594	177.859	142.89	192.074	188.111
169.054	168.598	168.383	130.267	185.709	153.82	182.056	174.984	161.261	155.516	155.076	141.101	180.536	153.541	206.235	200.211	150.373	177.594	143.575	189.802	188.192
167.895	168.394	166.61	130.307	184.122	152.468	183.102	174.995	161.767	155.868	155.309	140.538	180.749	154.798	207.105	199.643	151.215	178.67	144.243	191.5	188.549
168.446	168.727	167.359	129.958	184.255	152.309	182.235	177.532	160.289	155.859	155.713	140.814	180.597	154.147	207.043	200.26	153.338	178.278	143.404	190.359	188.405
168.803	170.194	167.58	130.251	184.397	151.464	183.133	176.97	160.883	155.95	156.196	140.576	179.982	154.358	205.963	199.256	151.605	179.191	144.327	191.184	189.015
168.378	169.24	167.927	129.832	184.743	150.653	182.814	175.958	160.66	156.005	155.639	141.539	178.383	154.756	205.337	199.019	151.607	178.933	142.861	191.675	188.394
168.848	167.391	168.23	130.183	184.375	152.651	182.33	175.696	160.291	156.005	156.269	141.647	180.411	154.146	209.499	199.243	151.712	177.471	143.053	191.521	189.299
167.637	169.379	168.251	130.875	183.578	152.195	183.489	175.73	159.124	154.095	156.641	140.731	182.759	154.141	206.625	198.639	152.68	180.012	143.658	192.465	190.095
169.094	168.949	166.043	131.049	181.449	152.176	182.358	176.698	159.886	155.295	156.472	141.837	180.897	153.678	206.659	200.003	151.623	178.228	144.374	193.45	189.65
168.03	169.542	168.984	130.081	181.765	151.596	184.292	175.822	159.831	155.455	155.744	142.659	183.526	154.103	207.023	200.723	150.88	177.781	144.318	193.241	189.444
168.388	167.623	168.148	131.418	182.549	152.524	183.897	175.928	159.215	154.851	156.418	142.361	180.798	153.658	207.591	200.301	152.562	178.14	144.205	193.021	189.938
170.124	167.987	166.651	130.993	184.874	151.501	184.646	177.043	161.054	154.768	156.372	142.186	181.006	154.101	207.956	200.127	151.101	177.836	143.512	190.38	190.262
169.514	168.016	167.143	131.258	182.989	151.172	184.867	176.786	161.235	154.638	156.158	141.69	179.92	153.48	207.602	200.759	152.229	178.672	144.709	191.438	189.959
170.125	168.789	166.437	131.734	182.376	152.55	184.997	177.775	160.693	155.265	156.047	141.907	180.108	153.404	207.278	200.788	152.29	178.558	145.3	193.558	190.238
170.658	169.249	167.987	131.09	183.985	151.758	185.821	177.779	161.245	156.391	155.963	141.379	181.135	152.21	208.534	199.568	152.058	178.036	144.485	193.246	189.071
169.828	169.377	168.698	131.623	181.368	152.322	185.111	177.83	160.636	155.289	155.626	142.165	181.945	153.337	208.022	198.857	152.074	178.527	145.525	195.135	189.711
169.592	169.775	168.874	131.971	181.146	152.508	185.846	177.446	160.187	154.985	156.957	141.273	181.189	152.783	208.305	199.586	151.113	179.194	144.316	193.635	189.878
169.43	170.066	171.088	132.335	183.66	151.929	185.071	178.141	160.396	155.223	155.623	141.524	182.065	153.054	207.692	200.525	150.881	181.175	144.289	193.858	189.28
169.181	169.306	167.488	132.486	182.789	152.422	186.205	177.187	160.681	155.214	158.878	142.363	181.82	154.957	209.747	199	151.518	180.222	144.705	193.658	188.178
169.071	167.948	167.853	132.433	183.646	152.921	187.203	177.755	160.039	155.521	156.979	142.549	181.539	155.508	209.274	201.413	150.673	180.153	144.975	194.391	189.736
168.743	168.454	167.646	132.989	184.789	152.663	187.253	178.489	159.837	154.731	155.867	142.076	180.233	155.288	209.025	199.4	151.697	179.17	144.775	194.16	189.918
168.68	169.124	168.842	133.092	184.324	152.552	188.197	177.935	160.102	154.814	157.01	141.57	182.512	155.122	207.268	200.278	151.69	178.731	143.231	194.859	189.515
168.616	168.766	167.564	131.935	183.159	152.166	187.459	178.557	159.4	155.306	157.666	141.217	182.689	154.607	207.276	199.961	151.122	179.637	142.786	194.148	190.11
168.546	169.71	167.493	132.818	183.269	153.325	187.253	178.484	159.237	154.887	157.318	141.291	184.886	154.329	207.837	199.494	151.016	180.923	143.4	195.542	189.904
169.323	169.939	168.992	133.319	183.903	153.412	187.753	178.557	159.793	155.817	157.749	141.027	184.404	153.975	209.047	200.99	151.759	180.731	144.202	194.622	190.075
168.68	168.56	167.676	132.29	182.976	153.86	188.312	179.623	159.663	155.216	157.791	141.517	183.933	155.166	210.201	199.438	150.54	179.51	143.625	193.975	189.419
169.504	168.307	170.176	132.746	185.267	152.602	187.819	180.182	160.508	155.972	156.847	141.734	184.157	155.221	209.152	199.657	150.462	179.3	144.581	193.881	190.301
169.656	168.515	170.547	133.379	184.594	153.782	188.662	180.615	161.478	156.617	158.828	141.224	185.235	153.667	209.734	198.873	151.137	177.648	144.534	194.732	191.557
169.481	168.311	169.088	133.055	185.793	153.043	189.613	180.032	161.024	157.388	157.157	141.207	185.621	153.727	210.485	200.493	151.421	177.304	144.02	195.501	190.608
169.89	168.864	169.601	133.204	186.851	154.713	188.494	179.126	161.396	156.287	157.88	142.03	186.925	152.971	210.887	200.432	151.391	177.016	144.456	195.342	191.16
169.075	170.233	168.313	133.574	186.145	153.635	189.796	178.988	162.047	156.944	156.26	142.866	185.372	153.692	209.532	200.257	151.909	177.163	144.19	195.182	190.453
168.926	170.14	170.456	134.059	185.76	153.16	190.167	178.911	162.217	157.207	159.508	141.179	185.911	153.285	209.056	200.539	150.978	177.806	144.603	196.531	191.124
169.358	169.902	169.692	132.639	183.864	152.688	191.26	179.217	160.902	156.495	157.564	142.328	187.5	154.134	211.004	201.161	149.829	179.344	144.462	197.124	190.005
169.984	169.296	167.354	133.797	182.579	153.614	188.923	179.966	162.001	157.604	159.821	142.218	185.436	155.345	209.99	201.348	150.885	181.995	145.285	197.551	190.003
169.843	167.897	167.962	133.193	182.785	153.517	190.285	179.204	161.697	157.517	160.414	141.883	182.52	155.739	210.495	201.378	150.394	179.426	146.365	196.965	191.572
170.286	168.853	168.544	133.61	183.692	154.779	189.569	180.055	162.254	157.971	159.267	143.101	183.512	153.962	209.264	200.274	151.624	181.333	145.383	197.048	191.055
170.242	168.913	167.183	133.71	183.67	155.177	192.068	179.927	161.791	157.85	158.61	141.907	183.279	154.07	210.367	201.02	151.218	179.975	145.015	197.155	190.622
169.804	169.005	168.964	133.042	182.851	155.346	192.396	180.176	161.263	157.347	158.852	142.062	185.496	153.433	212.248	200.408	151.924	178.627	145.444	197.269	191.019
170.432	168.721	167.944	133.361	182.786	153.827	191.387	179.946	161.474	156.973	157.753	141.383	184.363	153.632	213.239	201.877	153.001	180.285	145.717	196.789	189.74
169.319	170.085	167.916	133.776	184.111	154.084	192.75	179.188	161.984	156.836	159.085	142.021	184.833	154.629	211.851	201.692	151.494	179.977	145.043	198.199	190.529
169.877	169.887	167.728	134.125	184.637	155.467	191.711	180.234	162.621	158.186	158.857	142.314	184.096	153.705	211.229	203.682	151.354	178.918	143.999	198.449	190.221
169.938	169.023	167.198	133.327	182.441	155.049	191.177	179.524	162.348	157.572	158.998	142.902	181.994	154.738	211.273	201.074	151.131	181.712	144.614	198.973	191.417
169.706	168.858	168.335	134.264	182.643	153.444	192.248	180.353	163.076	157.371	158.976	142.828	183.2	156.193	211.281	201.961	150.127	179.612	145.092	199.308	191.298
170.693	169.06	169.87	133.652	184.229	153.023	191.732	180.825	162.196	155.892	160.4	144.019	183.507	156.07	211.234	202.077	151.877	179.472	144.832	197.404	191.025
170.575	169.444	170.522	133.112	181.57	153.746	191.048	180.418	161.942	156.995	161.691	143.878	180.903	154.239	213.947	202.107	151.696	179.68	145.108	198.006	189.826
170.491	169.172	169.17	133.113	184.921	153.972	192.418	181.443	164.295	157.225	160.983	143.577	182.75	154.929	213.55	201.524	152.32	177.865	144.888	199.046	191.665
171.777	167.545	167.235	133.182	184.85	154.655	191.113	180.928	163.866	156.878	158.429	142.468	181.802	154.986	213.304	201.892	151.757	179.826	145.212	198.677	192.315
170.353	167.771	168.488	133.547	182.953	153.907	191.224	181.126	163.999	157.147	159.939	142.111	180.972	154.174	213.287	202.177	150.982	180.394	145.085	198.898	192.566
170.339	169.388	167.039	133.925	183.425	153.776	192.267	180.488	163.431	157.641	160.417	142.257	181.936	154.08	214.053	202.879	152.328	180.334	144.354	200.341	191.437
171.323	169.657	168.539	134.708	184.405	153.742	192.438	181.037	163.08	158.762	159.637	141.814	183.137	152.865	214.99	201.263	153.206	181.297	144.561	201.471	190.393
171.548	169.843	168.183	133.443	183.415	153.592	193.829	180.533	163.23	158.455	160.622	143.069	181.901	153.386	214.851	202.424	152.586	180.007	144.347	200.532	189.897
171.733	170.09	167.69	133.335	183.366	153.665	192.954	181.579	164.089	158.088	159.238	142.782	182.108	154.514	215.202	202.919	155.31	179.381	144.269	200.25	190.142
171.235	170.429	168.955	132.985	183.455	154.341	193.68	181.31	163.088	158.744	158.933	141.606	182.59	154.122	214.868	202.355	154.03	181.292	145.29	199.462	190.331
171.407	169.827	168.078	133.971	182.876	153.947	193.722	181.849	162.829	158.068	157.349	142.658	183.548	154.788	215.664	202.781	155.17	180.602	145.472	200.509	191.054
169.651	170.052	166.587	134.423	183.551	154.938	192.598	182.024	164.099	159.274	159.191	143.374	184.375	154.613	214.878	200.864	154.126	179.767	145.39	199.719	191.647
168.788	168.082	167.472	134.278	183.707	154.4	194.001	182.156	163.192	159.394	159.494	144.289	182.434	155.582	215.993	201.481	154.336	179.437	143.476	199.464	190.151
169.054	167.806	167.286	134.532	181.837	155.215	194.067	182.119	163.755	159.807	159.57	144.423	182.724	154.474	214.58	201.125	154.512	179.873	144.5	199.034	190.596
169.281	168.24	166.946	134.131	183.345	155.367	194.725	183.232	165.18	157.804	158.19	143.178	180.822	154.599	214.652	200.896	154.029	182.337	144.423	200.015	192.483
170.15	168.141	167.157	133.565	183.95	155.033	195.312	183.116	163.576	157.509	157.665	142.27	183.041	155.535	216.636	203.03	154.069	181.455	145.619	200.733	191.988
169.077	168.908	167.295	133.55	185.528	154.571	195.124	183.734	163.774	157.669	159.919	142.144	184.621	155.86	214.637	203.743	154.896	180.814	145.183	202.181	192.068
169.966	169.609	166.185	133.796	183.631	154.694	194.292	183.287	163.04	158.991	158.237	141.787	185.111	156.259	215.397	202.962	154.273	181.304	145.84	202.281	192.17
169.637	168.428	166.056	133.652	183.356	155.474	194.521	183.904	163.204	158.971	158.674	143.088	186.165	156.027	216.187	203.468	153.933	180.211	146.321	203.497	190.683
170.187	168.066	165.695	134.037	184.661	155.867	195.572	183.519	164.985	158.976	157.708	143.05	185.961	156.921	215.966	203.77	153.909	180.453	146.425	203.181	190.444
170.604	167.983	167.057	134.095	184.751	155.332	195.485	183.541	164.615	158.402	158.515	142.357	186.382	156.084	216.624	202.923	153.725	181.338	145.225	201.838	191.636
171.081	170.002	170.79	135.1	183.947	155.904	194.879	184.508	164.093	159.196	157.154	142.58	183.074	156.285	216.541	202.778	153.081	181.783	145.49	202.148	191.301
169.774	169.342	167.446	135.54	185.252	156.131	195.413	184.3	165.108	158.901	158.352	141.914	183.89	155.427	216.303	203.688	153.933	181.974	145.475	203.352	190.941
170.213	169.005	167.396	135.768	184.854	156.329	194.963	184.053	165.312	160.118	158.951	141.81	185.324	155.328	215.692	202.556	152.622	179.91	145.734	203.526	190.69
170.513	170.747	168.028	135.429	183.869	155.932	196.231	183.636	164.924	159.735	159.954	141.789	183.268	155.77	217.189	203.049	154.054	181.295	146.33	202.399	191.659
171.436	170.55	168.948	135.17	182.484	155.811	195.368	184.401	165.006	159.39	158.673	143.116	183.033	154.726	215.232	204.131	154.823	183.11	145.964	201.882	191.751
169.052	168.38	168.379	134.416	183.173	156.967	197.552	184.167	164.307	159.644	157.353	143.487	182.988	155.667	215.752	204.496	154.969	183.506	147.632	202.711	192.46
169.388	168.505	168.668	135.424	184.733	157.699	196.256	184.106	164.948	158.263	157.37	143.79	183.151	155.869	215.837	203.748	154.789	183.799	147.013	202.642	191.561
170.968	169.481	169.246	135.239	186.251	156.251	196.27	184.801	165.66	157.678	156.902	142.723	181.644	155.54	215.567	205.716	152.993	182.916	147.364	202.799	191.854
170.306	169.085	169.736	134.568	186.22	157.304	196.875	183.882	164.817	159.992	156.747	143.329	181.698	155.348	214.899	205.362	152.893	182.642	146.693	202.428	192.468
171.641	168.813	170.085	134.826	183.148	156.57	196.229	183.889	164.926	160.354	157.028	143.248	182.609	155.431	215.276	205.493	152.819	182.587	145.941	203.923	192.674
171.928	169.122	169.499	134.382	186.036	155.474	195.645	185.04	164.868	159.853	156.502	143.012	182.802	156.166	215.985	205.929	153.205	182.044	146.154	202.259	194.853
170.971	169.527	169.808	134.316	188.397	155.759	198.174	184.278	165.516	159.935	157.546	143.865	184.596	156.406	217.174	204.381	154.406	181.421	146.745	204.149	194.71
171.713	169.435	168.963	134.246	187.393	155.226	198.354	184.382	164.992	159.706	157.911	142.701	182.33	157.204	217.037	205.094	154.916	182.275	146.061	202.904	193.906
172.199	170.017	170.645	135.559	188.061	158.126	196.849	184.969	165.42	160.298	159.104	143.666	180.639	157.137	218.061	204.854	152.684	182.678	146.279	202.32	193.313
171.32	169.854	169.631	135.411	187.142	158.005	196.309	184.836	164.554	160.847	157.969	143.837	182.598	156.022	218.212	204.028	154.117	182.685	147.338	202.886	193.355
169.637	168.867	167.387	134.987	188.675	158.442	196.073	184.23	165.261	159.809	157.541	142.614	182.71	157.121	216.009	203.884	155.39	182.085	147.644	203.453	193.602
169.789	169.776	167.779	135.203	188.773	158.547	197.657	184.873	165.435	158.993	156.592	142.546	182.712	156.945	217.265	204.351	155.154	182.315	146.426	204.758	192.986
170.049	170.09	168.617	135.419	186.995	157.105	198.036	184.873	165.625	159.63	157.485	143.134	183.041	156.158	216.742	203.785	156.123	181.892	147.565	203.423	194.136
169.856	169.688	168.115	134.81	189.886	158.005	197.704	184.71	164.262	159.423	158.264	143.291	184.578	156.422	217.646	203.564	156.277	183.725	147.797	205.04	194.969
170.706	170.265	169.458	135.812	186.605	156.109	197.631	186.323	165.113	160.452	158.648	143.52	185.198	155.291	218.477	204.869	155.987	184.187	145.296	203.767	194.682
170.156	170.128	170.043	135.766	187.72	157.651	195.95	187.043	164.267	159.728	159.171	144.023	185.734	156.637	216.845	204.99	154.402	183.895	147.455	204.669	195.868
170.695	170.604	168.464	136.137	186.316	156.651	195.638	185.618	164.587	159.635	158.224	142.993	185.27	156.392	218.959	205.11	154.899	183.423	147.657	204.924	195.495
171.968	171.912	170.434	134.75	186.896	157.892	198.679	186.374	164.862	159.418	159.315	143.933	185.977	155.987	219.787	205.837	154.196	181.906	146.675	205.094	195.738
171.367	171.42	170.195	135.323	185.864	157.421	199.51	185.941	164.606	159.951	158.231	142.525	184.657	156.65	221.112	206.917	154.99	182.476	147.19	203.001	196.755
171.851	170.069	169.152	135.154	188.05	157.923	199.138	185.581	165.612	160.485	158.108	143.182	184.067	156.564	221.82	206.344	155.506	183.513	147.185	204.232	195.364
170.38	170.205	169.677	134.9	187.937	156.415	199.76	186.184	165.012	160.082	158.573	143.649	184.467	156.121	220.182	205.123	154.566	181.262	148.409	203.805	197.96
170.314	170.184	166.991	134.367	188.541	156.157	198.55	185.565	164.237	160	161.837	144.992	184.823	156.293	217.796	204.809	154.259	179.561	147.702	204.107	197.064
171.849	169.644	168.164	133.888	189.554	157.486	198.959	185.464	163.536	159.829	161.635	144.252	186.994	155.544	220.119	205.798	155.085	179.842	148.403	204.607	197.101
170.661	169.735	170.258	133.579	185.662	157.463	199.043	186.123	164.496	159.826	162.207	144.289	184.835	154.663	219.389	205.053	154.056	180.189	148.464	205.454	195.839
172.604	169.023	167.659	134.286	185.648	158.949	200.339	186.661	163.709	160.737	162.416	144.285	184.519	156.244	220.35	206.415	152.491	178.363	147.319	205.665	195.709
171.194	167.669	167.014	134.991	186.858	157.533	201.131	186.857	164.577	161.398	162.566	144.653	185.845	156.323	220.708	204.909	152.952	180.336	148.048	205.857	195.286
172.257	168.375	168.058	135.217	187.313	157.308	201.488	187.195	164.578	162.228	162.671	144.5	184.645	156.308	221.197	203.883	154.246	181.674	147.878	206.667	196.717
173.351	170.211	170.023	134.735	185.069	158.205	201.036	187.566	163.982	160.49	160.225	143.545	185.418	156.602	218.936	204.272	154.127	180.15	148.76	206.728	197.432
172.008	170.377	169.143	134.817	183.863	158.76	199.953	187.481	164.409	160.255	160.705	144.1	186.305	157.453	218.561	205.128	154.272	182.945	148.066	204.626	197.194
172.148	169.881	168.797	134.698	185.901	159.201	201.484	188.407	164.281	161.56	161.262	145.978	185.279	156.274	219.758	205.115	153.777	181.504	148.091	205.466	195.224
172.138	169.832	166.621	135.582	187.423	158.057	199.234	187.191	164.32	161.287	161.832	144.103	183.753	156.419	221.823	206.096	153.794	182.561	149.287	206.52	195.048
171.677	170.02	169.708	135.294	185.125	158.445	200.061	187.826	164.853	160.597	160.198	143.979	182.373	156.489	220.843	206.113	154.188	182.477	149.251	206.095	195.667
173.708	169.374	168.911	135.339	186.022	157.048	201.256	187.775	164.137	159.87	159.621	143.621	184.269	156.293	220.942	206.094	154.291	182.927	148.746	206.444	197.619
171.978	170.32	168.385	135.867	183.545	157.273	200.958	187.583	164.457	160.26	161.022	142.887	183.577	156.104	221.872	205.27	154.942	181.455	147.957	207.4	197.239
173.5	169.893	167.617	134.929	184.926	157.035	199.953	187.504	163.353	160.651	159.266	143.421	184.557	157.836	220.085	205.556	154.607	180.513	147.841	207.213	195.804
172.248	169.08	167.766	135.705	184.144	157.008	199.776	187.047	163.839	160.266	159.996	142.97	185.013	156.779	219.461	204.837	154.043	180.915	148.135	207.126	196.403
172.412	168.983	167.192	136.454	184.496	154.482	200.37	186.415	164.221	160.33	161.019	143.702	183.479	157.794	218.037	206.122	154.206	182.008	148.419	208.018	196.654
171.885	169.438	167.58	135.344	183.908	156.688	199.68	188.194	163.833	161.453	160.283	143.927	185.04	155.866	218.93	206.366	153.585	182.32	148.733	208.232	197.183
171.235	167.932	169.515	135.186	185.848	157.206	201.307	188.102	163.433	161.108	160.833	144.63	187.401	156.624	218.247	206.534	155.718	180.247	148.912	208.513	198.394
171.885	169.988	169.937	135.929	186.033	157.75	200.763	188.706	162.935	162.041	160.776	143.034	186.837	156.393	220.117	206.911	154.489	182.368	147.113	209.302	197.724
172.311	169.719	169.682	135.474	186.103	158.264	201.465	187.933	163.372	162.931	161.115	143.96	185.426	156.67	219.835	207.033	155.472	181.12	146.888	207.459	198.864
172.815	169.787	167.685	136.092	185.905	158.804	203.355	187.637	163.539	161.904	160.133	143.4	183.889	156.927	218.898	206.436	154.574	181.491	147.956	207.823	197.506
172.716	169.426	168.412	135.672	186.748	159.153	202.161	188.96	163.649	162.319	159.916	143.84	186.144	155.569	218.754	207.886	155.099	183.172	148.121	208.399	196.699
172.141	168.415	167.955	134.954	185.877	156.678	202.361	189.008	163.318	161.176	161.571	144.174	183.505	155.8	219.367	207.77	154.154	182.478	148.595	209.331	197.949
172.02	170.204	167.412	135.912	185.469	157.83	203.565	189.795	164.049	161.14	161.233	145.17	183.571	154.48	218.733	208.343	154.108	183.825	147.463	209.269	198.167
172.611	171.086	169.037	136.229	185.221	157.445	201.76	189.414	165.661	162.183	162.46	145.653	184.361	155.95	219.025	207.03	155.567	181.955	148.608	208.594	198.636
173.358	170.304	168.242	137.036	186.277	157.401	201.238	189.747	165.314	162.175	162.509	144.847	184.791	155.48	217.964	206.277	154.891	181.978	147.305	207.661	199.087
172.786	170.598	168.909	137.247	185.167	156.731	201.839	188.402	164.728	162.339	160.698	143.855	182.82	155.263	218.242	207.295	154.432	182.782	148.227	209.206	199.689
173.29	170.228	170.453	137.306	187.747	154.808	204.719	189.753	165.456	161.517	159.346	145.574	184.697	155.426	218.671	207.078	154.03	184.532	148.518	207.329	198.962
173.805	169.368	169.618	136.26	185.908	155.502	202.384	190.064	165.142	162.148	159.858	144.702	186.492	155.832	218.427	205.353	154.716	183.158	148.585	209.082	199.103
173.437	169.133	168.525	136.351	187.141	156.451	204.366	189.461	164.999	162.022	160.821	144.648	184.643	155.709	218.173	207.288	155.882	183.486	147.901	208.477	198.904
173.821	168.967	168.356	137.676	185.296	158.03	202.543	190.851	164.778	161.458	161.346	146.02	184.039	155.779	218.927	207.341	155.274	180.807	148.477	208.452	200.159
171.672	168.463	169.382	138.186	184.989	156.953	203.43	189.442	164.872	161.725	162.864	145.156	184.622	155.662	219.953	208.416	155.02	182.068	149.098	207.546	199.658
171.587	168.476	170.679	138.397	183.858	155.785	202.279	190.408	164.932	161.323	161.416	146.066	184.642	153.571	219.497	209.263	153.922	182.427	147.854	208.603	199.898
172.597	170.392	170.088	137.995	185.533	158.178	203.327	191.3	164.698	160.559	162.048	146.7	182.867	155.799	219.877	208.784	153.844	182.03	147.803	207.846	199.17
173.77	170.198	168.181	138.294	183.923	157.326	201.37	192.202	166.374	161.093	161.408	145.06	185.46	155.69	218.248	208.089	152.696	183.775	149.38	208.05	199.662
172.095	169.878	168.17	137.893	185.317	158.435	202.997	190.007	165.832	160.719	164.522	145.919	183.312	155.761	218.875	207.492	152.863	182.213	147.789	209.23	200.042
173.463	169.563	171.659	137.483	184.496	158.617	201.494	190.386	166.218	162.194	162.872	146.693	181.626	155.561	218.202	209.422	153.788	181.695	149.067	209.488	199.849
172.923	169.903	169.886	136.77	185.992	157.524	201.98	189.827	165.048	161.063	163.846	146.069	184.268	155.677	219.488	208.513	153.15	181.285	148.665	211.811	200.68
171.993	169.015	171.162	138.091	183.203	156.354	205.212	190.058	165.3	160.719	162.476	146.333	182.448	156.7	220.576	207.965	153.539	180.37	149.609	210.798	199.86
171.734	169.624	167.946	138.813	184.348	157.81	205.122	190.325	164.058	161.63	162.434	146.183	181.503	156.33	221.071	207.637	152.753	182.217	148.523	208.675	198.965
172.13	170.423	169.963	137.893	184.181	157.901	203.831	189.889	164.228	160.453	162.433	145.351	183.464	155.747	220.006	207.388	153.123	183.029	147.207	209.642	198.678
172.158	169.518	171.209	137.77	184.594	158.207	203.192	190.149	165.258	161.075	162.39	145.005	184.671	155.829	220.386	208.22	153.414	183.954	147.922	211.45	198.131
171.273	168.891	170.497	138.066	182.567	159.358	204.513	190.492	165.796	160.898	163.146	145.818	182.908	156.665	219.7	208.791	154.21	184.783	149.052	211.442	199.917
171.598	170.148	170.074	137.887	185.247	159.442	202.737	189.144	165.351	162.066	162.114	145.922	183.018	156.516	218.933	208.511	154.425	185.488	148.14	210.217	199.921
172.143	168.825	169.97	138.531	184.268	158.387	203.376	190.533	166.229	163.327	161.74	145.428	182.431	155.646	220.219	209.578	153.683	183.121	147.879	209.993	200.258
170.956	167.588	169.661	138.261	184.362	159.017	205.648	190.211	165.119	162.45	161.516	145.432	184.167	155.414	219.521	209.739	153.814	184.322	147.507	209.42	200.023
170.339	168.302	169.343	137.705	183.886	158.519	203.987	191.002	165.227	162.123	161.653	144.965	184.162	156.46	219.186	208.614	154.462	184.16	148.328	209.771	201.223
171.682	168.459	171.313	138.507	185.789	159.964	204.296	192.178	164.46	162.444	162.587	145.343	182.359	156.423	221.87	207.787	154.466	183.637	148.192	209.018	200.856
173.104	169.511	171.699	138.799	184.166	158.95	204.951	191.128	163.142	161.539	160.996	145.286	183.772	156.69	220.578	209.204	153.064	183.925	148.848	210.645	201.909
174.472	170.485	168.422	137.963	184.579	158.092	205.993	191.685	163.599	161.166	160.667	144.879	182.714	154.991	220.771	210.165	154.045	184.023	148.915	211.186	202.061
172.825	170.764	170.156	138.538	185.126	159.194	208.068	193.328	162.92	161.606	160.108	144.719	183.655	156.09	221.327	210.369	155.826	184.719	149.421	210.32	202.842
172.366	170.665	171.351	138.436	183.898	161.14	207.682	193.798	163.645	160.987	161.468	145.814	184.518	156.619	223.201	209.013	155.266	186.067	149.452	210.326	203.43
172.11	170.443	169.091	137.792	182.469	161.232	205.88	191.808	164.298	160.483	160.53	145.984	186.235	156.186	222.678	209.504	155.116	183.124	150.409	210.35	202.938
172.498	172.489	169.029	138.665	182.215	162.441	207.082	191.664	165.064	161.256	163.028	146.904	185.67	157.371	222.071	208.393	156.041	183.571	149.735	211.442	201.317
172.474	171.965	170.317	138.757	181.306	160.476	206.941	191.721	164.76	161.651	162.708	146.682	184.301	157.859	220.472	207.226	157.204	182.963	149.339	210.955	201.22
172.292	172.048	168.875	138.14	183.845	159.774	206.428	191.668	164.424	160.085	162.665	146.304	182.74	156.454	221.451	207.856	156.698	182.711	149.805	210.79	201.869
172.948	171.269	167.152	138.848	185.653	159.168	205.98	192.228	164.893	161.319	161.776	146.092	182.749	157.338	221.443	208.569	156.312	184.256	149.773	211.315	201.697
172.286	171.527	169.434	138.361	184.771	159.84	207.214	192.912	165.744	161.786	163.061	145.87	183.758	158.249	219.055	210.414	155.866	183.496	148.374	211.978	202.642
173.479	170.041	167.789	138.564	183.964	159.067	207.212	193.907	165.737	162.53	161.608	145.06	184.52	156.015	220.464	207.766	155.059	182.837	148.704	211.444	202.962
173.18	170.919	170.095	138.24	185.497	159.033	207.547	193.81	165.174	163.834	163.44	146.553	181.698	157.309	220.902	208.183	154.917	183.039	149.094	211.328	201.593
172.076	170.61	169.881	138.413	184.909	157.917	206.658	193.26	164.387	164.287	163.266	147.419	185.005	157.285	222.046	209.372	154.691	183.353	149.805	212.329	202.001
172.757	171.433	168.343	138.846	183.993	158.445	204.785	194.033	165.381	162.519	163.578	148.145	184.856	157.234	223.324	209.366	152.876	185.573	148.764	212.767	201.323
171.994	172.024	167.714	139.234	183.639	159.074	205.728	193.274	165.993	162.259	162.229	147.092	184.668	158.024	221.797	208.377	153.361	183.518	148.381	211.742	202.376
172.576	170.791	166.791	139.579	182.589	158.78	207.155	194.934	165.037	161.316	162.438	146.839	183.899	157.903	222.583	207.516	153.384	181.926	148.519	211.787	202.164
172.806	172.18	167.833	139.754	184.772	159.034	207.524	194.829	164.726	161.918	164.391	146.665	184.557	156.894	223.016	206.099	152.659	184.488	148.364	213.506	202.312
173.442	172.285	169.525	139.648	185.562	160.029	207.125	192.884	165.444	162.961	165.139	147.492	185.813	157.155	224.379	207.293	152.573	184.582	149.094	213.56	202.279
171.845	171.81	172.431	138.589	187.4	159.712	208.014	192.787	166.724	163.424	164.063	146.674	184.523	157.869	223.043	208.557	154.231	183.099	148.643	213.832	201.681
171.232	172.304	169.617	139.481	184.142	158.405	208.824	192.875	166.553	161.645	164.375	147.195	184.497	157.606	225.403	208.391	155.43	183.391	150.262	213.437	202.55
173.124	170.758	169.37	138.926	185.748	157.962	207.886	192.838	165.878	161.434	163.609	145.907	185.031	156.951	225.15	208.746	152.4	182.822	148.957	212.623	202.486
173.096	172.235	168.198	138.594	186.328	159.662	207.368	193.23	166.562	162.664	162.005	147.483	183.84	157.281	222.168	209.077	153.017	184.274	149.039	212.094	201.464
172.562	172.901	169.067	138.947	184.038	159.191	207.646	194.927	165.67	164.242	161.759	146.897	185.465	159.34	221.143	208.827	152.379	181.318	149.997	211.086	202.238
172.688	172.86	168.443	138.986	185.219	158.61	207.8	196.319	166.551	163.674	163.359	146.736	185.884	157.684	222.118	209.564	151.866	184.129	150.602	211.225	202.237
173.641	171.929	168.557	139.187	186.079	159.088	207.106	197.193	165.529	163.13	162.751	146.916	185.663	158.5	222.436	209.548	152.589	183.504	149.915	211.803	202.476
173.478	171.332	166.821	138.651	184.578	158.652	208.367	196.306	164.643	161.983	164.341	145.96	185.37	158.35	222.871	208.378	152.6	184.896	149.683	211.873	201.861
173.326	170.598	168.61	138.726	185.405	158.014	207.959	195.943	163.986	163.328	163.209	146.21	184.843	156.373	222.821	209.341	152.904	182.881	150.06	212.098	203.157
171.918	171.019	170.827	139.034	187.651	160.018	205.985	196.353	164.032	163.731	163.586	145.548	185.924	157.997	221.888	209.97	154.107	182.193	150.23	212.779	202.937
172.64	170.81	172.828	138.579	186.677	159.386	207.017	197.249	165.652	162.776	163.597	146.568	185.439	156.671	223.91	211.315	151.224	183.641	150.393	211.912	203.682
171.977	170.635	171.679	138.847	186.114	159.529	208.503	196.793	166.634	163.752	162.185	145.909	186.074	156.527	223.238	209.239	152.082	183.856	150.525	212.538	203.426
171.324	170.472	171.104	139.768	186.257	158.915	206.734	196.823	166.246	163.486	161.459	145.955	185.156	158.491	224.682	210.391	149.791	182.843	150.214	212.089	201.824
173.439	169.728	170.826	140.332	187.045	158.211	207.722	197.3	165.992	163.471	164.132	145.181	184.666	156.435	225.61	211.657	151.85	184.557	150.17	212.24	202.525
174.179	170.688	169.615	138.925	187.611	158.872	208.672	195.534	166.04	163.971	163.276	147.624	182.872	158.086	224.644	209.981	152.907	182.86	150.41	213.664	202.387
172.781	171.409	168.759	139.579	187.329	158.612	209.236	195.219	167.509	163.001	163.898	146.937	184.686	156.901	223.024	210.271	152.014	180.93	150.998	213.45	203.283
173.034	170.541	169.74	139.056	186.518	158.973	207.837	195.837	166.154	163.248	164.692	146.342	183.767	157.817	223.049	210.143	151.541	181.759	150.117	212.122	201.576
173.48	171.326	169.801	139.828	186.194	160.308	208.301	195.814	166.678	162.436	164.191	146.633	184.358	157.077	225.568	211.261	153.487	181.519	150.024	211.896	201.703
174.463	170.631	168.071	140.138	184.626	159.422	208.803	196.408	166.586	163.042	164.698	145.962	183.785	157.088	225.091	209.399	153.578	180.736	150.823	210.096	201.638
174.914	170.223	167.66	141.558	185.445	160.299	209.396	196.346	166.238	163.449	163.54	146.267	184.772	156.811	225.091	211.262	152.79	181.889	150.145	213.037	203.086
173.532	170.567	168.109	140.694	186.566	160.163	210.866	196.53	166.697	162.44	163.412	146.962	183.037	157.109	225.033	209.199	153.63	183.552	150.912	212.115	202.464
174.458	170.074	168.5	139.708	184.558	160.278	211.592	196.567	166.208	161.729	162.214	145.949	183.979	155.575	226.465	210.47	153.259	184.075	150.314	211.942	204.394
173.959	169.99	171.25	140.43	185.171	159.471	210.691	196.332	166.559	163.005	163.557	145.865	184.398	157.126	224.921	211.746	152.343	182.96	150.736	213.368	203.487
173.795	169.384	170.715	140.4	185.487	161.542	210.966	196.338	166.542	162.829	163.6	146.857	182.771	158.68	223.91	210.532	153.131	180.969	150.447	215.018	202.868
174.576	169.819	170.314	139.543	183.256	160.979	210.497	196.77	167.855	163.998	162.664	147.378	183.605	156.532	224.389	211.834	153.412	181.673	150.519	213.165	203.579
174.378	170.31	169.192	139.46	181.693	159.338	210.176	196.859	167.617	163.255	163.185	146.814	185.219	156.126	224.323	212.39	153.826	180.436	151.209	213.386	202.597
173.45	169.294	168.896	139.552	181.708	159.568	208.248	197.144	167.637	163.293	163.978	146.154	183.489	156.833	224.576	210.668	154.356	182.279	151.992	212.99	201.367
173.542	168.741	166.673	138.564	181.429	160.214	210.148	198.026	167.79	164.313	163.904	146.698	184.112	156.448	223.586	211.516	153.424	181.996	152.366	211.206	202.117
173.093	169.218	167.838	138.352	182.049	161.522	210.866	196.721	167.585	165.154	164.414	146.822	181.266	157.172	224.716	211.082	153.349	182.201	152.914	211.611	203.418
174.199	170.95	168.453	138.71	181.311	160.574	210.351	196.664	167.093	164.446	163.91	146.129	180.132	157.623	224.36	209.176	153.108	184.104	151.566	211.101	202.553
173.411	171.862	170.447	139.368	183.657	160.564	212.236	197.194	166.403	164.416	163.211	146.89	183.237	158.249	224.174	209.913	154.647	184.745	150.841	211.593	204.893
173.959	171.762	171.756	139.215	183.111	161.98	211.939	195.368	166.946	164.632	162.06	147.748	184.763	159.108	224.068	209.993	154.629	183.678	151.813	212.782	205.201
173.126	172.273	169.582	139.031	184.688	161.999	210.252	197.013	167.004	164.93	162.837	148.373	183.851	157.828	221.75	208.932	155.153	182.151	151.538	213.005	203.689
174.112	170.779	170.432	138.95	183.929	161.272	211.472	196.11	166.215	164.708	162.517	148.048	182.806	158.634	222.091	209.409	155.143	183.678	150.583	214.577	204.854
173.306	171.272	169.746	138.854	184.676	161.249	211.51	194.705	166.886	163.953	163.543	147.789	184.353	158.904	222.663	210.444	154.175	184.653	151.828	212.967	204.182
173.956	170.735	172.528	139.635	186.542	158.993	210.717	196.255	167.162	164.779	163.83	149.652	183.602	157.086	222.517	210.856	154.447	184.853	151.837	212.338	203.854
174.082	170.977	172.099	139.486	187.016	159.968	208.161	198.153	167.864	164.268	164.541	149.166	183.001	159.737	222.81	211.647	154.574	183.736	152.616	215.153	203.325
175.311	171.146	171.258	139.281	185.375	160.056	208.94	197.962	167.763	164.107	163.34	150.012	182.053	158.65	223.039	209.178	153.122	181.812	151.944	215.537	202.244
175.887	169.447	172.029	139.205	186.869	159.101	208.512	197.904	167.495	164.834	164.884	150.116	182.32	157.096	225.058	208.24	152.791	181.508	152.108	217.31	204.564
175.627	171.756	171.116	140.01	185.226	160.9	209.836	197.062	167.677	164.354	164.382	150.625	183.253	157.333	224.149	208.583	152.52	182.266	151.036	214.069	203.174
174.241	171.102	169.593	140.388	187.036	161.508	209.834	197.423	166.374	164.517	163.495	150.047	182.362	157.401	223.831	209.444	153.517	182.707	152.522	213.653	202.837
174.272	171.915	169.059	140.647	185.152	161.238	211.537	198.656	166.584	165.045	161.923	148.042	183.896	158.88	224.258	209.416	153.424	184.443	152.743	214.377	204.256
174.436	172.609	170.093	140.417	183.978	159.67	210.144	197.2	167.077	165.528	163.777	148.591	183.352	158.587	224.665	209.385	152.567	183.379	151.912	213.746	203.097
174.596	171.859	172.003	140.909	182.783	161.085	209.597	197.416	166.839	165.848	164.875	149.827	183.328	158.257	224.102	209.093	153.346	180.675	151.836	214.607	205.648
174.02	171.148	170.663	139.707	184.21	161.299	210.467	197.821	166.589	165.467	164.977	149.034	183.488	159.193	222.033	210.482	154.494	182.015	150.284	214.659	205.549
173.659	171.92	171.913	139.543	185.203	160.965	209.808	198.575	166.328	165.687	162.757	148.457	184.641	158.669	223.99	210.487	154.087	182.661	152.02	214.484	204.588
174.39	171.657	171.372	139.857	184.718	161.757	210.435	198.447	166.9	166.437	161.939	148.392	183.238	157.692	224.757	208.26	154.646	180.863	152.222	214.37	205.335
174.796	171.209	171.346	139.797	183.912	160.87	210.21	197.16	166.908	166.344	162.952	148.456	182.771	159.168	223.613	209.082	153.952	182.479	151.756	216.285	205.32
173.05	172.081	169.474	140.405	183.094	160.029	212.718	197.714	166.588	165.184	164.935	147.594	181.393	159.577	223.239	209.063	153.994	180.656	152.076	215.895	204.767
173.358	171.357	168.744	140.367	184.538	160.058	212.1	199.417	167.177	165.611	166.766	148.792	182.89	159.5	223.763	209.776	152.729	183.296	151.012	216.815	206.164
174.974	171.203	170.29	140.207	186.355	160.47	213.037	199.075	166.143	165.171	165.51	148.972	183.258	158.696	224.538	210.157	154.144	182.629	153.653	215.688	205.443
174.531	171.23	169.94	140.133	188.159	159.617	211.461	199.244	167.653	164.659	164.203	149.518	182.955	159.043	224.397	210.728	154.143	184.198	153.852	215.43	203.453
174.216	170.953	172.021	140.81	184.194	159.396	212.138	200.316	167.628	164.024	164.119	150.49	185.219	159.924	224.734	211.909	154.01	182.924	152.363	216.607	203.996
172.955	172.232	171.254	142.402	185.218	160.189	212.69	200.185	167.671	164.269	163.617	149.156	181.959	158.569	225.699	211.699	153.51	182.773	151.904	216.537	204.185
174.484	172.24	173.005	140.135	183.339	159.845	213.145	200.594	167.21	165.162	163.396	149.18	181.141	157.453	226.389	212.089	154.166	180.346	151.204	216.92	205.041
174.432	172.611	172.651	140.583	184.073	159.929	212.77	200.221	168.173	165.493	164.422	148.564	181.653	159.029	227.062	210.677	154.032	181.794	151.647	215.598	205.507
174.302	171.429	174.23	140.841	185.665	160.353	214.861	199.719	167.92	166.077	163.327	148.999	184.728	158.587	225.759	209.9	153.836	180.655	152.065	214.532	206.742
174.42	170.323	172.267	140.4	186.584	160.374	214.011	199.602	168.351	165.948	166.015	149.005	184.153	158.348	225.452	210.8	153.807	181.645	151.934	215.446	205.704
173.797	171.412	172.833	140.708	186.778	160.344	215.362	199.5	168.376	165.635	166.303	149.278	185.017	158.07	224.68	210.095	154.743	180.867	152.037	215.644	206.638
172.399	169.791	173.431	140.368	187.226	160.588	213.573	199.493	167.966	165.255	165.647	149.258	186.655	158.878	223.826	210.139	155.377	179.829	152.257	215.89	206.725
173.573	170.355	172	139.235	185.053	160.775	213.602	198.46	167.068	165.778	164.413	148.646	183.467	159.58	224.771	211.65	154.827	179.791	152.265	216.478	204.927
174.467	171.008	172.406	139.702	187.027	161.289	212.642	198.456	166.526	165.84	164.65	148.184	182.579	160.102	224.441	210.843	155.827	180.653	151.957	215.344	205.407
172.219	170.496	171.524	138.493	187.998	161.604	213.147	197.938	167.626	164.953	164.398	147.806	182.197	160.429	225.597	211.479	155.19	181.107	153.436	216.812	206.243
173.116	170.425	170.495	140.106	185.992	162.357	212.623	199.739	167.322	165.069	164.201	148.648	182.797	160.655	224.09	210.162	153.854	181.142	151.94	216.405	203.958
173.847	170.784	170.454	140.976	187.535	161.866	212.859	200.264	167.147	166.413	163.046	149.717	183.298	159.576	223.188	210.77	153.961	181.26	152.207	215.144	203.955
173.796	171.604	172.038	141.219	185.061	161.539	212.918	199.41	166.991	165.391	162.821	148.667	183.343	160.646	225.288	210.588	154.379	181.586	152.73	217.586	205.187
174.716	171.923	172.323	140.199	184.658	160.367	213.697	198.371	167.341	164.873	163.152	148.254	184.404	159.723	224.543	210.437	153.756	181.784	154.588	217.14	204.142
174.272	171.621	172.569	140.325	184.631	160.812	214.645	200.474	166.874	165.309	163.568	147.818	184.467	159.387	224.286	209.345	152.362	182.766	153.249	216.86	203.265
172.891	171.322	171.026	141.214	184.139	160.468	215.416	200.6	165.839	165.14	164.774	147.79	183.044	160.274	224.889	209.466	153.212	184.246	152.811	216.402	203.325
173.702	170.8	169.408	141.735	184.433	160.047	213.79	200.95	166.615	165.701	164.449	149.37	182.838	161.112	222.731	211.015	154.995	183.552	153.229	216.318	203.791
174.581	170.148	168.956	142.134	184.509	160.648	213.148	200.131	166.099	164.612	165.985	150.151	183.657	159.89	223.002	209.735	154.063	180.346	153.565	216.466	205.115
174.919	170.309	169.026	141.544	184.513	161.17	213.317	201.46	165.727	166.518	163.979	149.745	182.214	159.14	223.849	208.97	155.301	181.517	152.241	215.483	204.553
174.628	171.225	169.51	141.685	184.904	161.402	213.264	201.708	165.656	167.217	164.357	148.47	184.21	158.986	222.348	208.047	156.926	180.959	152.178	215.84	203.633
174.011	170.175	170.469	142.339	185.528	161.694	214.516	201.589	166.102	165.796	163.679	149.134	182.783	158.821	223.963	208.392	156.223	182.331	152.311	216.085	204.286
173.538	170.985	171.468	141.349	181.551	160.95	214.394	201.295	166.402	165.191	163.219	148.472	184.808	159.737	223.19	209.093	156.934	181.623	152.841	215.368	205.345
173.248	171.033	171.524	141.548	182.924	160.398	214.744	201.655	166.102	165.956	164.733	149.077	186.245	160.99	222.655	209.705	156.228	185.062	152.434	213.016	205.664
172.994	172.074	169.683	140.994	183.479	162.213	214.458	202.079	166.437	165.108	164.334	149.132	187.496	160.7	223.28	211.993	155.365	183.317	151.642	212.571	207.266
175.164	171.614	169.954	140.81	182.487	161.209	214.835	201.889	166.428	165.168	165.029	148.951	185.366	160.231	222.318	210.392	155.697	181.513	151.521	213.02	207.264
175.666	171.211	171.261	141.278	182.261	161.113	215.15	201.55	166.858	165.599	162.343	149.056	186.428	158.561	222.753	211.904	155.033	181.363	152.801	212.789	207.651
174.432	172.242	170.807	140.032	180.016	160.474	213.876	202.863	166.223	164.957	163.332	147.904	185.271	157.421	222.723	211.608	154.949	179.26	151.971	214.131	207.263
173.895	171.715	171.708	140.823	182.525	160.474	214.987	202.895	165.794	165.889	163.773	149.512	185.818	158.306	222.952	211.748	155.389	180.975	151.782	213.017	206.723
173.097	170.802	173.41	140.714	181.29	159.645	214.939	202.701	166.662	166.05	163.101	148.078	184.298	159.032	223.834	212.408	154.189	181.368	152.275	214.555	206.514
173.122	170.849	171.759	140.389	181.891	160.062	215.591	202.219	168.242	167.188	161.848	148.905	186.185	160.192	225.077	210.27	154.55	181.628	152.812	214.123	206.714
173.477	170.093	170.782	140.956	182.714	161.355	215.389	202.695	167.621	166.153	163.02	148.503	185.618	159.358	223.54	210.802	154.71	181.72	151.827	214.979	207.002
174.003	170.374	168.95	140.852	181.542	161.487	213.436	200.864	167.918	166.544	163.474	148.036	183.531	159.416	224.57	211.82	153.99	180.114	153.39	215.701	207.047
175.361	169.513	168.399	141.769	182.941	161.98	214.737	201.726	166.677	165.53	163.273	148.785	185.653	157.589	221.643	211.684	155.116	179.035	152.269	213.68	206.625
175.693	170.229	171.046	142.848	184.03	161.453	214.853	201.233	167	165.503	164.513	149.101	186.784	158.451	220.989	212.288	154.428	182.522	152.584	214.995	205.865
176.003	170.585	171.229	141.743	181.802	161.854	214.408	202.549	167.738	165.05	162.596	148.927	185.044	158.761	220.59	212.975	155.735	180.987	153.637	215	205.131
175.465	170.696	170.86	141.604	180.489	161.677	213.322	202.324	167.033	164.943	163.185	148.29	185.516	159.531	221.701	212.598	155.744	182.238	153.038	216.046	204.377
174.665	169.775	170.468	140.889	180.295	162.874	216.224	202.521	167.09	166.169	162.918	147.932	186.882	161.072	222.712	211.37	156.131	182.718	153.788	217.178	206.087
174.751	170.766	171.047	141.828	182.072	161.334	216.056	203.952	167.473	167.046	162.601	148.249	185.435	160.693	222.743	212.033	155.175	179.331	152.347	215.365	205.355
173.786	170.68	172.688	140.737	180.997	161.394	216.234	202.575	168.437	165.81	162.402	147.899	186.267	160.835	222.143	211.396	155.663	180.409	152.252	214.849	206.706
173.403	171.461	170.382	141.8	180.178	161.816	217.301	202.387	167.585	165.571	162.161	146.853	186.553	160.626	223.238	211.997	155.759	181.864	152.348	215.146	205.476
173.904	171.769	169.268	141.937	182.706	160.204	216.854	204.037	167.6	165.612	163.244	148.484	184.056	160.367	224.385	211.413	154.688	181.854	153.452	214.807	205.51
174.025	171.436	169.831	140.902	181.017	162.781	218.371	203.936	167.954	165.399	163.116	147.996	185.333	160.651	223.618	213.197	155.197	181.751	153.421	215.147	206.313
175.649	171.832	171.25	141.299	179.443	163.8	217.017	205.55	167.466	166.088	162.806	148.998	183.882	159.337	224.22	213.075	154.867	181.866	153.593	216.304	205.652
173.781	170.804	173.002	141.61	180.163	162.463	216.716	204.062	167.507	166.435	163.388	149.996	183.537	159.228	222.636	210.401	155.262	181.058	153.925	216.034	206.011
173.452	172.71	171.018	142.473	179.997	162.349	215.635	202.363	167.838	165.505	164.489	149.037	184.429	158.35	224.483	210.842	155.077	181.41	154.577	216.556	206.427
173.827	172.733	170.036	141.549	181.106	161.613	215.639	203.117	167.815	166.115	164.475	149.964	182.512	158.804	222.931	211.518	156.698	181.369	155.523	215.579	205.762
174.266	173.185	171.543	140.588	180.693	161.524	215.411	202.348	168.862	165.075	165.279	149.257	184.417	159.008	222.734	210.132	155.914	181.432	154.257	217.308	206.685
174.972	171.965	174.162	141.045	183.032	162.471	214.004	203.198	167.182	165.413	164.621	148.008	184.191	160.586	223.111	211.753	156.211	180.669	153.763	216.788	209.048
174.291	171.138	174.664	141.285	181.661	161.981	214.069	205.25	167.15	165.459	162.822	149.476	185.1	158.938	223.155	210.85	155.635	178.244	154.934	216.454	207.413
174.273	173.14	175.281	142.04	181.414	162.153	215.643	205.039	166.771	165.012	163.082	148.976	186.141	158.796	223.748	211.15	155.516	179.943	153.767	217.15	206.607
173.697	173.39	175.502	140.986	181.751	162.762	217.175	203.297	165.745	165.313	161.823	147.398	185.005	159.047	225.235	212.467	155.077	182.32	154.649	216.929	208.081
172.477	172.904	175.339	141.018	179.923	162.771	217.896	202.799	166.653	165.162	162.878	147.037	181.931	159.485	225.929	212.305	154.588	181.911	155.397	216.625	207.96
173.139	173.348	174.999	141.791	182.072	161.715	216.753	201.871	166.181	164.561	163.347	147.18	183.018	161.681	224.884	213.376	154.715	180.55	154.276	216.331	207.563
173.298	172.389	175.452	140.994	182.21	162.287	217.406	202.124	165.211	165.14	161.659	147.974	183.431	160.359	224.336	212.605	153.231	181.045	154.513	218.731	207.355
172.782	171.925	171.65	141.046	183.323	161.609	216.383	202.783	166.605	165.932	163.697	148.699	181.55	160.843	224.721	215.675	154.631	179.576	154.278	219.801	206.167
172.77	170.745	172.061	141.167	182.836	162.558	216.913	203.759	166.727	165.118	162.326	148.984	182.687	159.441	225.41	215.636	154.977	178.886	154.689	217.869	207.819
172.793	171.586	173.902	141.644	181.649	162.084	215.186	203.08	166.87	165.685	161.689	148.948	183.579	159.21	224.596	213.313	156.138	177.415	155.043	215.987	207.606
173.471	171.469	173.122	142.015	182.577	162.27	214.826	203.881	166.767	165.716	161.955	148.625	183.703	159.624	223.524	214.313	155.989	180.68	154.995	216.385	208.339
173.745	170.963	171.655	141.229	182.238	162.749	216.993	204.053	167.73	165.476	160.534	147.884	182.247	158.52	223.355	212.055	155.427	178.69	154.14	215.693	208.041
173.768	170.938	173.445	141.661	183.938	161.172	216.059	201.406	166.985	165.229	161.608	146.793	183.816	160.229	223.557	211.195	155.403	179.974	154.987	216.575	208.338
172.353	170.929	172.784	142.336	180.55	161.847	216.264	202.919	168.051	166.002	162.086	147.698	184.36	160.584	223.195	210.815	156.446	180.887	154.583	215.459	208.448
174.072	170.228	173.267	143.389	180.505	161.414	217.977	204.498	167.707	165.973	164.449	147.806	185.603	159.634	224.067	211.645	155.973	179.655	155.476	214.821	206.963
172.994	169.033	173.026	141.331	178.769	159.901	217.507	203.461	166.987	165.189	165.102	148.717	184.241	159.519	224.075	211.768	154.427	178.948	153.556	215.571	206.083
172.554	169.944	171.195	142.02	180.408	160.148	216.87	203.674	166.918	166.275	163.682	147.403	182.187	159.843	224.539	211.399	155.58	180.088	153.287	218	207.731
172.721	170.259	171.622	141.414	179.999	161.984	216.682	204.402	166.611	166.483	163.307	148.494	184.264	160.313	225.457	211.35	156.851	181.238	153.631	215.619	206.81
172.586	169.437	170.962	141.864	180.605	161.09	216.034	204.176	167.233	165.985	164.063	146.918	184.274	158.951	223.748	211.343	156.698	180.442	153.809	215.411	207.921
173.316	171.027	171.777	142.655	177.325	161.462	217.66	205.559	168.321	166.828	165.387	147.304	183.825	159.628	224.473	212.224	157.821	182.397	152.798	216.586	209.352
173.628	171.847	173.264	143.116	177.854	159.359	215.744	204.443	166.965	166.361	166.6	147.433	183.915	159.2	225.402	212.241	159.474	181.663	154.529	218.061	208.933
175.003	171.566	171.454	143.363	178.277	162.306	214.868	203.647	167.35	165.953	164.447	148.315	182.781	159.969	224.702	212.272	158.499	180.414	153.602	217.734	211.305
173.037	170.086	171.299	142.116	179.044	161.222	215.844	205.958	167.089	165.467	164.371	149.492	183.534	159.502	224.754	212.39	157.666	180.258	153.633	217.635	209.9
173.135	171.184	174.306	142.532	177.439	159.868	215.401	205.987	168.168	165.543	165.389	149.18	182.6	159.428	226.229	213.24	156.403	179.036	153.055	217.407	209.12
173.65	171.775	171.673	141.212	180.489	160.52	216.28	205.445	168.856	165.884	164.765	148.512	182.821	160.327	225.814	213.16	156.25	180.097	153.499	218.476	208.511
173.359	172.296	169.586	141.952	178.027	160.638	217.614	207.476	167.604	165.967	162.528	148.281	181.84	160.515	224.827	213.131	156.034	179.58	154.049	217.629	209.115
173.29	172.068	170.467	141.909	179.689	159.831	218.018	205.573	168.703	164.685	160.235	149.966	183.585	160.737	224.176	214.232	155.528	180.684	152.67	216.295	209.628
174.495	171.782	170.372	142.64	178.479	160.856	219.305	205.071	169.109	166.211	160.795	148.44	181.769	160.133	225.148	215.271	154.791	181.84	153.696	218.783	209.142
174.589	171.293	171.872	142.013	179.486	160.343	218.718	204.965	168.472	165.309	161.283	148.202	182.482	160.629	223.587	213.652	154.253	181.022	153.743	217.029	207.944
174.945	172.689	171.054	142.145	177.445	159.675	219.822	205.964	168.241	165.239	161.242	149.653	181	161.278	223.261	213.127	154.649	179.671	153.266	216.596	206.65
173.782	171.467	171.084	143.153	176.036	159.968	220.17	207.978	168.16	164.941	160.709	149.432	180.595	161.749	224.337	213.384	154.898	180.183	155.264	217.975	208.183
172.583	169.733	172.537	141.838	176.206	159.938	219.985	206.842	168.306	164.466	162.631	148.795	180.074	161.836	224.212	212.244	156.195	182.534	155.743	217.51	207.217
172.217	169.708	173.356	141.391	178.144	159.515	220.546	206.525	167.257	164.13	163.626	148.164	181.582	162.249	223.889	211.613	156.305	183.176	153.938	217.121	206.919
172.045	170.485	171.873	142.063	177.961	160.23	220.896	204.287	167.14	163.932	160.544	148.02	182.544	161.289	224.54	212.196	156.24	181.385	152.609	216.926	206.391
174.156	170.867	170.804	142.183	178.722	161.045	220.374	204.798	167.061	164.427	161.418	148.867	184.053	161.194	223.865	212.984	155.271	183.108	152.089	217.09	206.285
174.17	170.71	170.621	142.467	176.98	162.164	218.474	204.573	167.596	164.098	161.091	148.9	183.689	160.889	224.108	213.071	156.775	182.084	152.926	218.012	206.447
172.973	172.054	172.474	142.349	179.012	160.919	219.158	204.239	166.826	163.942	162.051	149.065	184.588	161.73	225.862	212.648	156.313	180.767	152.925	216.533	206.58
173.724	171.15	171.988	143.282	179.892	160.941	219.716	205.609	167.487	164.801	162.697	149.682	181.857	162.553	223.417	213.238	156.094	180.779	153.362	214.614	205.552
172.833	170.887	171.614	142.21	182.075	160.441	217.531	204.243	168.395	165.147	161.87	148.607	184.172	162.165	223.639	212.694	155.936	181.088	153.222	218.563	206.476
173.391	170.183	171.792	141.781	181.397	161.986	218.816	205.005	168.469	165.846	162.728	150.211	183.583	160.779	223.697	213.377	156.744	180.544	154.607	217.329	206.892
174.251	171.271	172.774	141.809	180.617	159.285	218.791	205.444	168.093	167.996	162.735	149.938	186.119	160.335	223.764	212.791	157.158	179.25	153.921	217.208	208.785
173.429	170.659	172.263	142.652	181.774	159.974	218.816	205.552	168.158	166.938	162.141	149.483	183.858	160.151	223.051	213.667	157.045	181.45	153.967	215.374	207.031
173.324	171.666	172.23	142.233	180.338	161.143	218.498	206.713	168.104	164.955	162.514	149.59	184.638	161.211	224.055	213.787	157.325	181.259	155.675	215.805	208.467
174.42	173.377	174.983	142.423	180.059	161.664	218.629	206.072	167.29	164.72	161.442	148.46	184.624	160.83	224.346	213.645	157.828	180.715	154.923	216.331	210.095
175.764	172.136	172.915	142.188	181.174	161.034	219.45	209.046	167.555	164.415	160.212	149.946	183.308	161.355	225.106	212.155	158.062	179.4	153.384	216.596	209.324
174.566	172.185	171.436	141.582	183.623	162.682	217.184	207.828	168.032	164.791	159.757	149.246	183.209	161.009	224.523	212.085	157.942	179.737	155.195	215.701	209.608
175.157	172.158	170.03	141.638	181.842	161.999	219.186	207.136	168.044	165.465	162.49	149.239	184.159	160.245	224.466	213.988	157.203	180.283	153.746	217.504	208.843
174.399	172.258	171.695	142.9	180.509	162.247	217.463	208.426	167.944	165.035	163.114	151.807	184.34	159.841	225.131	213.023	157.978	178.4	152.338	214.943	206.816
173.252	171.381	172.677	142.734	179.812	162.392	219.351	206.266	168.394	164.79	162.705	151.05	185.915	160.711	225.282	212.505	157.147	178.274	152.676	215.575	208.299
173.423	171.909	170.63	143.36	179.93	162.298	217.699	206.61	167.152	165.322	162.926	152.287	185.698	158.442	224.875	211.427	156.263	178.356	152.218	217.007	208.87
175.231	172.825	171.689	143.341	179.155	161.79	219.23	206.509	166.496	165.905	161.453	152.03	185.884	160.438	223.712	212.169	155.683	182.247	152.205	217.781	208.069
174.117	174.151	169.849	143.002	179.564	162.25	219.444	205.377	167.351	165.515	164.121	151.324	185.132	160.679	224.501	211.442	155.687	180.909	153.517	218.515	206.869
175.606	172.849	173.343	142.459	181.97	163.536	219.935	205.354	167.566	164.499	163.763	151.01	184.13	161.683	223.977	211.809	154.067	180.794	153.599	219.351	207.958
174.295	173.557	170.596	141.872	182.233	164.124	219.087	204.672	167.729	164.15	165.14	150.263	182.75	161.437	224.257	212.776	154.42	180.908	153.741	217.924	207.588
174.062	172.328	169.894	142.948	181.557	162.141	219.428	205.307	167.463	165.59	163.616	151.101	184.146	161.076	225.085	213.5	157.001	181.311	155.476	218.096	210.206
175.207	171.487	171.44	143.111	183.108	160.97	220.422	206.193	167.042	166.158	162.207	151.931	183.195	161.153	226.074	212.958	156.782	183.101	154.736	219.667	209.665
174.57	172.303	170.763	142.779	182.27	161.72	220.535	205.635	166.911	164.546	163.388	149.449	185.276	161.411	226.586	213.173	155.567	182.192	154.864	217.679	207.895
174.029	172.745	171.077	143.585	180.474	162.347	219.451	205.782	167.785	164.939	161.801	149.239	183.614	160.95	227.575	214.018	154.332	181.097	153.766	217.819	209.257
173.526	173.205	171.988	142.92	178.677	161.128	218.884	206.755	167.46	165.633	164.681	148.886	183.825	161.462	225.222	214.394	155.88	181.305	155.868	216.124	208.144
173.009	170.021	171.329	142.449	178.966	161.992	219.244	205.283	165.955	167.395	164.539	151.025	182.945	161.646	225.667	213.034	155.901	181.813	156.023	217.636	208.184
173.255	171.171	174.219	142.665	178.63	162.162	219.298	206.196	166.58	164.251	163.879	152.219	184.349	160.958	225.88	213.601	156.519	181.867	155.711	218.069	208.249
173.468	171.459	172.565	142.408	179.282	161.576	219.788	206.911	167.452	164.438	165.423	151.542	184.5	161.036	224.921	214.13	155.962	181.06	155.203	216.472	209.124
174.475	171.961	172.527	141.258	179.492	161.255	219.72	207.745	167.441	165.236	166.899	151.704	184.378	160.642	224.398	214.378	156.865	182.003	154.404	215.599	210.79
173.358	171.287	172.992	142.697	179.915	161.917	219.196	207.616	167.119	165.852	164.181	150.583	184.621	160.013	225.381	214.4	156.917	181.9	154.439	217.079	209.404
173.41	172.617	171.258	142.904	179.567	160.613	220.206	207.499	167.217	166.15	162.787	151.856	184.798	159.532	226.349	214.129	155.857	183.331	153.541	218.33	209.18
174.311	170.731	171.063	143.643	178.267	161.469	223.008	206.374	166.607	166.288	162.893	151.883	184.906	160.524	224.784	214.921	155.965	181.473	153.867	217.621	212.13
174.791	171.586	170.809	142.635	179.396	160.514	220.163	205.551	166.787	165.958	161.789	151.138	185.287	160.566	224.147	212.983	155.474	183.47	153.284	216.981	210.53
174.105	172.424	171.022	142.999	180.523	159.909	219.868	206.485	166.116	166.586	162.321	152.862	184.318	160.877	225.296	212.689	154.389	181.783	154.454	219.878	209.51
173.707	172.283	169.003	142.898	179.171	160.633	219.154	207.623	166.368	165.697	162.025	151.123	188.185	161.839	226.546	212.113	155.77	182.506	155.996	219.773	211.394
174.31	171.922	170.002	144.018	180.198	160.401	220.739	207.304	167.848	164.812	163.06	152.129	182.009	161.729	223.964	212.37	155.985	179.243	155.421	220.1	210.973
175.223	173.467	170.125	143.686	181.009	162.022	219.2	207.141	167.506	165.458	163.472	150.882	183.343	160.833	224.482	213.209	155.546	179.355	154.42	219.188	210.102
175.134	172.097	170.408	142.908	185.447	161.55	219.194	208.055	167.792	165.357	163.871	151.124	185.13	161.927	222.597	213.686	155.079	181	153.143	219.065	210.684
175.266	172.088	173.371	142.731	183.939	160.855	219.602	207.28	167.068	167.016	164.804	151.922	187.038	161.802	221.597	212.96	154.015	179.706	152.635	220.069	209.456
174.948	171.158	171.43	143.622	182.135	163.471	219.442	207.763	167.747	166.995	163.654	151.536	185.466	159.642	224.673	212.972	155.242	179.7	154.397	219.483	213.278
174.478	171.943	171.628	143.193	181.153	160.982	219.677	206.15	167.407	165.887	162.873	151.869	180.368	158.569	223.159	214.269	155.017	181.462	152.846	219.097	210.9
174.089	172.956	171.355	143.955	182.101	160.595	220.525	206.56	167.362	164.988	163.832	151.253	183.375	160.593	225.984	212.741	154.608	181.155	153.284	219.009	212.552
173.182	172.527	170.15	143.789	183.884	161.754	220.578	205.606	168.046	165.595	163.762	151.675	182.559	161.001	225.126	214.381	155.668	180.133	155.447	219.546	211.576
174.484	172.362	169.61	142.171	182.029	161.861	221.101	207.183	168.044	164.846	165.629	151.839	181.869	160.507	225.934	212.314	156.626	178.981	154.262	217.279	212.434
173.711	172.205	168.681	142.948	182.928	161.179	222.25	206.116	166.676	166.767	164.789	151.248	181.445	160.398	225.451	212.335	155.766	179.388	152.884	217.337	213.095
173.723	173.093	169.224	144.264	184.249	160.54	221.465	206.746	166.721	166.242	165.262	151.276	183.795	161.124	225.433	213.317	156.408	179.892	153.177	218.208	213.417
172.265	171.87	170.046	144.447	183.351	160.086	220.785	207.781	167.181	166.3	164.904	151.248	185.286	160.504	225.78	211.638	155.011	179.386	153.043	218.236	213.919
172.647	171.756	171.115	144.381	183.706	159.914	222.44	206.429	167.445	166.548	164.74	152.984	183.631	160.846	223.39	211.979	156.619	177.469	153.128	219.762	211.051
172.576	171.093	172.493	144.891	181.992	160.365	222.039	207.452	168.547	166.253	164.569	153.136	183.166	160.672	224.846	213.939	156.686	178.438	153.131	219.256	210.484
173.063	170.369	173.103	144.522	180.3	159.394	221.54	208.188	168.628	166.309	163.173	153.305	185.316	162.797	223.632	213.014	155.424	180.001	154.065	218.903	211.312
174.421	171.294	174.81	144.799	181.261	160.835	218.969	207.472	167.451	165.528	164.104	151.816	184.97	161.697	224.416	213.767	156.117	178.267	155.551	218.357	210.789
175.153	170.882	172.512	145.709	181.297	162.208	220.137	206.348	167.983	165.446	164.434	151.666	184.564	162.377	223.108	215.043	154.932	177.698	154.493	219.085	211.887
174.289	173.201	172.979	145.073	180.511	162.167	222.343	207.618	168.319	166.123	164.517	151.033	182.919	163.157	224.421	215.038	154.562	179.961	155.873	219.959	211.873
173.32	172.226	174.182	145.021	183.117	160.392	222.52	208.888	169.06	167.375	163.524	151.525	184.303	161.207	223.728	213.895	155.397	179.673	155.581	218.86	211.184
173.057	172.867	172.295	144.537	180.241	160.742	221.801	206.425	167.492	165.571	163.63	150.933	184.952	161.488	224.124	214.282	155.35	180.221	153.771	218.996	210.288
173.117	171.872	172.487	144.278	182.876	161.942	221.504	207.169	169.275	165.466	164.346	151.325	182.559	162.371	224.117	213.54	154.689	179.556	153.126	220.692	210.843
173.683	172.509	172.097	145.375	181.405	161.179	220.521	207.778	169.282	167.006	163.662	149.768	182.759	162.873	226.537	214.225	154.64	180.73	155.243	217.697	211.694
174.122	173.96	170.94	144.592	180.412	160.653	221.397	206.158	168.081	165.247	164.193	150.678	182.832	163.172	225.802	214.779	155.433	177.438	155.263	218.428	210.68
173.663	172.256	170.833	144.505	179.296	161.501	222.878	206.615	168.638	166.008	164.413	149.705	184.506	163.817	225.033	215.077	155.826	178.388	154.134	218.894	212.166
172.811	173.385	172.346	144.995	179.421	161.155	222.418	206.566	168.452	166.145	163.083	150.285	182.698	161.594	224.797	215.337	157.557	178.636	154.615	219.254	212.31
173.856	173.974	174.321	144.261	177.234	161.844	223.007	207.671	167.637	166.794	164.392	151.07	182.868	162.113	222.61	214.363	156.947	179.107	155.211	217.712	213.258
173.043	172.499	175.683	145.552	180.726	161.602	220.585	208.907	168.328	165.44	164.943	151.328	182.946	161.485	222.682	214.061	155.764	177.712	154.464	216.738	214.219
174.129	171.954	173.581	146.427	179.59	162.108	219.84	208.885	169.848	166.379	164.274	151.213	183.35	162.344	223.064	215.196	157.102	176.448	154.834	215.09	212.474
173.326	171.541	173.636	145.526	180.193	161.578	219.461	207.016	168.746	165.261	165.005	151.819	181.32	163.965	224.285	214.999	157.059	179.698	154.514	215.999	211.345
174.44	171.457	173.294	144.407	181.271	161.932	221.149	208.866	168.263	165.611	163.941	150	184.678	164.173	224.483	216.592	157.289	178.13	155.011	216.422	214.416
175.001	171.648	173.645	143.674	181.369	160.986	220.72	209.786	167.404	165.575	165.708	151.131	184.123	162.83	224.145	215.697	157.86	179.345	155.768	216.815	211.632
174.254	171.483	172.918	143.141	181.522	159.752	221.645	210.38	166.679	165.397	163.013	151.967	184.681	164.798	223.984	214.132	156.686	178.901	156.174	216.683	211.147
173.733	172.725	173.525	144.045	180.288	161.444	221.084	209.951	168.442	165.666	163.279	152.934	184.64	164.076	224.42	214.166	156.567	178.874	157.86	216.254	211.38
173.316	173.637	172.836	144.968	180.402	160.609	221.661	208.285	169.136	165.899	163.221	152.275	186.047	163.803	223.698	214.934	155.853	177.704	158.229	216.767	210.011
173.971	173.071	175.995	144.565	181.342	159.08	221.925	207.809	169.136	165.656	163.048	151.355	185.867	164.609	224.357	215.049	155.96	179.128	156.484	217.451	211.842
173.515	172.299	175.158	143.654	180.905	160.473	221.742	207.51	169.065	166.094	163.698	152.925	187.601	163.367	225.891	215.246	155.996	180.624	157.56	218.773	211.478
175.438	172.579	172.659	144.917	181	161.401	221.836	207.697	167.666	164.371	164.485	154.107	184.533	164.461	224.811	213.428	157.747	180.333	156.538	218.942	212.524
174.548	173.06	171.607	144.562	184.095	159.431	221.332	207.639	168.016	164.602	164.43	153.751	183.689	162.881	225.073	214.008	157.239	179.321	156.532	216.066	212.266
173.335	172.523	170.819	143.949	182.688	159.347	220.486	208.689	167.994	165.501	164.558	151.084	184.202	163.077	226.04	214.427	156.816	181.438	155.511	219.089	213.574
172.435	170.761	173.035	143.798	182.422	162.228	219.581	208.03	167.201	166.264	163.586	151.064	184.473	163.473	227.426	215.904	157.04	181.552	154.626	219.729	213.737
174.079	171.433	172.091	143.329	183.037	161.485	221.889	209.322	167.337	165.605	163.669	151.869	182.616	163.429	226.658	216.957	156.22	180.648	156.318	217.431	213.651
173.478	171.399	172.608	143.653	181.304	162.122	220.583	208.436	166.658	165.444	162.797	150.629	183.088	164.011	226.594	216.756	156.768	182.123	156.508	217.706	212.395
173.19	172.66	171.877	145.192	179.834	162.125	222.234	208.753	167.191	165.443	162.951	151.868	184.367	162.8	228.337	215.615	156.853	180.46	157.047	217.187	212.537
173.25	173.963	171.169	143.94	181.45	160.965	220.916	209.66	167.276	165.118	162.218	151.732	184.118	163.804	226.496	214.117	156.591	179.704	156.366	217.643	212.739
174.189	173.337	170.873	144.272	181.828	160.371	221.572	209.304	167.445	165.042	164.338	152.535	182.184	162.891	225.151	214.229	156.939	179.598	154.808	216.629	214.334
173.618	173.165	171.761	143.827	180.983	160.735	221.336	209.191	168.271	163.741	163.238	151.347	182.442	162.054	224.985	212.841	156.261	179.458	155.911	215.826	212.462
173.735	172.68	173.684	144.325	180.597	159.233	221.476	208.624	168.271	163.713	162.341	151.149	181.743	162.211	224.395	214.353	154.479	178.704	155.136	218.25	211.928
173.924	173.675	170.925	144.117	180.15	161.335	221.017	208.487	167.636	166.499	161.668	151.568	180.391	162.465	225.061	215.695	153.285	177.338	154.92	217.779	212.821
174.424	172.258	171.654	144.517	179.624	161.125	221.59	207.135	168.06	165.505	162.16	150.96	179.748	162.67	225.79	214.859	155.335	178.573	154.366	218.476	212.653
173.08	172.608	172.262	143.934	178.068	160.668	218.13	209.326	167.011	165.877	161.552	151.422	180.956	161.004	225.2	214.451	154.129	178.664	154.464	219.23	213.251
173.22	173.404	174.983	144.806	178.437	162.61	218.933	208.688	167.744	166.265	161.467	151.46	182.11	161.682	224.088	215.052	153.417	179.764	153.886	219.069	212.61
173.282	173.396	176.021	145.478	178.002	163.706	220.464	209.046	166.739	166.207	164.018	150.576	181.699	162.157	223.32	214.71	153.86	181.275	154.716	219.862	213.585
172.283	173.194	173.212	144.883	178.757	164.079	224.273	209.856	167.381	165.562	162.975	152.62	181.926	161.297	222.522	216.281	151.818	181.934	155.805	218.52	212.102
172.929	172.612	173.184	145.394	180.127	161.657	224.026	209.826	167.34	165.952	162.79	152.569	180.909	161.816	222.702	214.698	153.08	180.339	155.748	217.558	210.818
172.643	173.551	172.656	144.197	183.131	160.36	222.247	208.203	167.378	165.116	163.006	151.704	181.829	160.688	223.311	214.651	153.33	179.758	154.988	218.34	211.9
173.1	173.814	172.146	144.166	185.134	159.228	222.581	208.714	166.841	166.437	162.535	150.105	181.379	162.966	222.695	214.742	154.259	179.65	155.01	218.384	211.958
173.326	173.677	173.655	144.3	185.309	159.605	220.86	208.362	166.852	166.911	162.769	150.476	182.182	162.848	223.956	214.559	153.519	181.645	155.032	218.579	211.191
172.941	172.953	172.849	143.727	182.987	161.278	222.277	208.411	167.961	167.47	161.927	151.407	182.32	163.837	224.477	215.448	154.227	181.635	155.5	217.336	212.698
172.836	173.64	173.6	144.934	182.982	161.847	221.471	207.266	168.315	167.748	162.118	150.258	182.956	161.796	224.442	214.02	154.566	182.029	155.539	218.296	211.352
172.056	172.174	173.042	144.424	184.856	161.581	220.678	208.046	168.026	168.196	163.848	150.865	182.201	162.937	225.971	213.742	154.472	179.759	155.514	219.352	212.117
173.243	171.962	172.584	144.718	182.759	160.105	220.836	208.03	168.518	167.193	162.898	149.754	182.466	161.485	226.182	215.338	154.689	180.513	155.202	217.167	213.534
172.343	172.6	170.717	145.986	181.754	159.938	221.212	209.636	168.077	167.049	163.69	149.922	182.669	161.613	224.629	214.277	154.749	180.172	155.888	218.916	211.13
172.748	172.565	171.809	145.803	180.429	159.348	220.828	209.189	168.306	166.152	163.263	150.936	181.965	162.336	225.246	214.213	152.773	181.905	155.771	216.571	211.558
172.64	171.566	173.189	145.243	179.798	159.377	221.405	208.707	167.769	166.098	164.113	149.832	182.519	162.406	224.667	213.646	152.919	181.835	156.293	217.889	213.245
173.47	171.793	172.343	145.922	181.539	159.849	222.865	208.869	169.118	166.351	166.862	150.999	182.465	162.093	224.336	215.632	153.519	181.719	155.767	217.725	213.231
173.295	172.348	171.325	146.49	182.362	159.762	223.459	208.664	167.257	166.42	166.655	151.201	180.88	162.078	224.677	213.588	154.449	178.878	155.551	217.043	212.15
174.458	171.812	172.103	145.581	180.301	159.909	223.486	208.899	167.927	164.73	162.969	150.873	182.442	162.864	224.334	214.559	154.195	180.288	155.036	217.177	211.093
174.521	170.638	172.76	145.472	180.144	160.06	223.189	210.777	168.511	165.906	163.763	150.952	181.631	163.275	225.953	212.462	153.15	180.224	155.283	217.298	211.676
173.956	170.865	169.374	144.598	179.748	161.396	223.316	209.847	168.247	165.301	162.997	153.132	179.718	162.097	224.255	212.773	154.898	180.499	155.715	217.454	214.113
173.569	170.393	170.817	145.807	182.901	158.717	224.765	209.709	166.501	167.521	164.533	151.645	181.27	163.327	225.939	213.468	154.423	180.564	155.512	216.934	214.21
173.274	172.214	172.808	145.322	180.686	158.662	225.159	209.955	167.047	166.743	165.787	150.161	179.813	163.792	223.563	214.43	156.661	180.524	156.071	217.464	213.365
174.401	171.396	172.795	145.954	181.544	160.556	223.6	209.244	166.678	166.124	166.62	151.571	180.595	162.253	224.764	214.026	155.055	177.72	155.272	217.253	212.367
173.838	171.537	171.894	144.884	179.725	161.216	224.098	210.656	166.83	166.872	164.507	152.2	182.492	163.673	225.009	214.865	155.008	178.291	154.943	218.153	212.126
171.958	172.237	171.686	145.862	182.806	160.17	224.251	208.674	166.575	166.304	164.028	151.453	182.381	164.226	226.043	215.428	153.2	179.337	154.879	217.865	213.171
173.17	171.887	173.441	146.925	181.782	158.995	224.371	210.968	168.012	165.113	163.04	151.283	180.685	163.899	226.103	214.45	154.775	180.717	153.35	217.345	210.883
174.541	172.446	174.175	146.22	180.826	159.272	222.732	208.903	168.107	165.545	162.261	149.806	181.868	162.661	223.019	214.891	155.784	181.598	154.63	217.363	210.006
174.091	172.3	174.801	145.704	179.535	159.479	222.124	209.995	168.405	166.026	163.18	149.893	180.556	163.988	224.972	213.9	155.22	182.673	155.928	217.517	210.603
173.109	171.715	174.106	145.761	181.64	158.995	222.726	209.403	168.934	166.579	164.061	150.832	180.937	163.45	224.755	215.154	155.488	182.216	156.064	216.927	211.03
174.537	172.209	174.765	146.149	179.151	159.569	222.984	210.265	168.934	166.036	164.498	150.802	178.409	163.971	226.581	213.499	155.523	181.379	156.147	218.813	211.917
173.314	171.766	173.588	144.75	179.949	160.822	224.055	210.222	168.301	166.065	163.598	149.891	180.875	163.661	224.126	213.766	155.939	179.781	155.45	218.171	211.492
173.974	171.738	170.965	144.353	179.97	160.359	222.861	209.634	168.802	167.285	163.9	152.091	180.906	164.66	224.42	214.005	155.477	181.779	156.818	217.977	213.605
173.314	170.402	170.899	146.359	178.153	159.825	223.009	209.659	168.504	166.556	163.769	150.979	179.404	163.373	224.498	215.84	154.724	182.214	158.044	218.137	213.013
173.743	172.948	170.033	146.84	179.918	159.271	223.995	208.891	168.911	166.55	164.766	152.504	178.475	163.471	226.649	214.723	155.145	182.28	156.688	219.286	212.681
173.089	172.47	169.52	146.66	180.958	160.149	223.988	210.163	168.896	167.152	164.663	150.936	180.672	162.445	226.752	214.742	156.163	181.757	155.554	218.104	212.804
173.979	171.257	169.367	147.177	181.615	159.441	221.862	211.211	169.873	167.244	164.486	150.721	179.853	164.292	224.075	215.453	155.918	181.213	154.683	217.531	212.93
172.628	172.935	169.528	146.538	182.04	160.784	221.717	210.886	168.275	165.657	162.892	149.13	179.198	163.263	224.703	216.349	157.832	180.232	154.873	217.069	211.801
173.134	171.842	170.032	145.491	182.402	161.554	220.918	210.177	168.601	166.613	161.715	151.606	180.149	163.911	225.212	215.558	157.16	180.388	155.897	217.313	212.122
173.112	171.76	169.676	146.624	181.615	161.207	221.705	210.648	168.904	167.249	161.655	150.609	181.432	163.79	225.627	215.017	156.868	179.121	155.484	218.249	210.942
173.248	172.7	171.326	145.984	181.456	159.995	222.504	210.247	169.666	166.74	161.921	150.242	182.72	164.273	224.599	214.748	156.023	180.353	154.43	219.721	209.623
175.02	172.3	172.098	145.393	182.677	160.105	222.999	211.1	169.488	166.052	161.771	150.372	181.629	162.786	224.999	215.584	155.56	180.699	155.979	220.032	211.593
174.303	171.411	171.45	145.329	181.896	160.851	222.525	210.459	169.289	166.051	163.047	151.118	182.025	163.665	224.502	214.029	156.385	180.582	155.538	219.571	209.819
176.182	171.658	170.529	146.423	182.289	160.164	224.438	210.613	168.795	166.152	163.897	152.258	178.404	164.821	223.518	214.744	156.221	182.329	155.335	219.553	211.711
175.781	172.792	170.177	146.011	182.482	160.327	223.805	209.915	169.204	164.911	162.563	152.16	181.155	163.322	224.475	214.324	156.518	182.425	156.225	219.867	211.696
174.28	171.744	171.051	145.825	183.332	160.677	223.291	210.042	170.529	166.445	163.417	151.036	181.328	164.456	223.817	217.217	154.727	181.96	155.949	219.804	212.85
174.305	172.739	175.487	145.809	183.415	160.573	223.063	210.782	168.64	165.278	164.507	150.559	181.133	163.935	224.285	215.185	154.663	181.033	155.448	216.367	213.437
174.929	173.466	171.401	145.862	184.091	159.636	223.452	210.621	168.61	164.976	163.087	150.529	180.808	164.394	225.102	216.867	154.241	182.913	155.575	217.646	211.499
175.621	174.525	173.433	145.831	182.829	160.127	222.603	210.931	168.247	165.028	164.334	150.891	180.185	163.941	222.476	217.223	155.591	182.272	156.084	218.272	212.981
175.608	173.528	171.939	145.917	182.61	160.888	222.293	210.628	170.754	164.326	164.201	150.726	180.349	164.058	225.251	216.716	157.308	181.313	156.954	218.496	213.704
174.834	172.858	172.593	146.221	183.083	161.268	222.589	212.175	169.254	165.73	164.227	150.631	180.511	164.929	224.195	216.816	158.486	181.913	155.463	218.502	213.339
175.105	171.965	172.621	146.072	185.254	161.508	221.338	209.816	171.236	166.035	162.686	150.967	183.343	164.234	223.755	215.429	158.646	181.325	155.734	219.284	211.476
173.482	171.817	172.81	146.346	183.828	161.087	221.42	209.974	170.4	165.996	165.159	152.693	183.733	165.069	224.281	216.031	157.928	180.258	155.496	217.905	213.298
174.498	172.238	172.999	146.647	181.678	162.536	223.481	210.884	170.013	167.57	163.029	153.105	183.709	165.893	222.899	216.283	156.708	179.189	155.944	218.152	210.585
175.14	171.846	174.024	146.456	182.458	162.056	222.944	209.899	169.29	165.586	164.669	150.767	183.534	164.797	223.284	214.977	156.497	181.564	154.727	220.182	209.768
174.599	171.589	175.228	147.274	180.766	161.577	222.032	209.557	169.506	165.728	162.756	151.114	182.904	165.508	222.073	215.194	156.011	179.769	154.463	219.936	212.132
173.443	171.789	175.041	146.769	180.82	162.055	222.353	210.285	168.991	167.121	162.2	150.55	180.784	164.728	223.671	215.262	157.174	180.483	154.929	218.55	213.003
173.666	171.964	173.885	146.641	181.039	161.706	223.07	209.442	170.223	166.713	162.286	150.998	179.59	165.582	223.64	214.931	158.151	180.386	154.351	219.088	212.788
174.295	172.324	171.914	144.909	181.176	159.86	223.309	211.403	169.587	167.482	163.23	151.535	179.901	165.305	223.113	215.555	158.415	180.106	153.85	220.371	211.035
172.743	173.169	173.047	144.885	179.272	160.922	222.981	209.973	169.306	166.564	164.172	151.082	179.779	163.855	223.814	215.237	157.788	178.854	155.374	218.316	212.123
172.936	172.996	173.048	144.379	180.861	158.93	222.343	210.124	167.34	166.197	163.568	151.783	179.908	164.396	223.716	214.482	158.077	179.791	154.652	219.373	212.237
173.578	172.32	172.552	145.412	182.246	159.499	224.084	211.769	169.854	166.405	164.102	151.177	181.242	162.921	224.141	216.238	157.974	181.253	154.001	218.219	212.31
174.416	172.608	171.794	146.255	182.698	159.856	222.946	211.187	169.195	167.813	165.175	149.927	181.079	164.615	224.566	215.484	158.11	182.203	153.755	219.945	212.11
172.94	171.373	171.627	143.996	181.754	160.876	225.271	211.804	169.048	167.915	163.811	149.636	181.072	164.449	223.848	215.396	158.63	183.886	155.089	219.077	212.435
173.53	171.148	170.453	145.268	179.396	162.482	225.161	208.933	168.667	167.133	163.084	149.877	181.74	164.224	223.481	214.989	159.593	181.002	153.766	216.702	211.258
173.905	172.324	171.395	144.601	182.886	160.664	225.201	208.797	169.001	167.45	163.737	150.563	181.03	163.668	223.905	214.855	156.8	180.841	154.734	218.792	212.195
174.313	171.482	172.796	144.655	180.957	161.391	224.821	210.086	169.659	167.582	163.695	151.61	180.607	162.581	223.396	215.182	156.506	179.659	153.27	220.669	212.615
173.963	172.385	169.988	145.416	181.084	160.922	223.651	209.21	170.901	167.95	165.047	152.023	182.281	162.299	222.659	215.231	157.221	180.26	154.313	219.926	212.619
173.984	171.85	172.039	146.084	181.639	161.062	222.904	211.339	169.95	168.399	162.866	152.542	181.801	162.477	223.127	214.777	158.21	179.283	155.136	219.745	211.245
175.423	172.234	171.029	146.897	181.469	160.883	222.861	210.585	170.459	167.494	163.655	152.198	183.86	165.02	223.333	216.282	158.885	179.214	154.722	217.157	212.873
173.288	172.036	172.19	146.511	181.4	159.505	223.576	209.041	170.5	166.376	162.453	151.997	184.063	163.627	223.143	216.372	156.954	180.222	157.271	216.307	213.907
174.928	171.339	171.547	146.222	181.961	159.694	224.339	210.346	169.671	167.599	164.485	150.67	183.575	163.831	225.204	217.128	159.481	181.121	156.705	217.702	211.944
173.389	171.61	169.337	145.576	180.793	159.398	223.572	210.016	170.363	166.236	164.647	150.205	183.408	162.487	224.683	215.936	158.771	182.497	155.655	218.959	211.511
172.404	172.056	170.782	146.193	181.861	159.973	223.53	208.965	169.429	165.191	164.159	149.869	180.921	163.204	224.417	216.419	158.272	182.817	155.956	218.675	211.815
173.892	173.05	170.098	145.809	182.658	160.056	223.886	211.639	169.044	167.157	162.537	150.493	182.134	162.998	225.13	213.395	158.392	180.427	155.34	219.194	212.174
174.321	173.334	167.79	146.023	181.521	162.417	223.859	209.995	170.088	167.392	161.937	151.026	185.008	161.199	224.519	214.775	156.619	182.12	154.773	218.35	212.297
172.302	173.776	168.396	146.658	181.438	161.6	224.012	210.595	169.455	167.904	161.17	151.474	182.758	161.56	224.521	215.529	156.452	182.751	155.271	218.383	213.737
171.891	172.266	168.814	147.257	181.596	163.199	224.252	210.846	169.722	167.149	161.488	150.88	182.636	161.713	226.093	217.648	157.674	182.607	153.705	220.912	212.187
172.043	172.714	168.89	147.48	181.956	163.853	224.789	210.593	168.969	168.43	163.227	150.266	183.03	161.821	226.581	216.926	156.544	183.403	154.373	221.494	214.06
172.83	171.25	172.646	147.176	181.142	162.33	224.565	209.461	168.434	167.141	164.309	150.174	181.351	161.951	226.84	215.672	157.465	183.568	155.377	220.707	214.407
172.126	170.884	171.541	146.801	182.596	162.58	224.262	209.01	168.553	165.921	163.816	150.403	181.411	161.942	226.928	215.378	156.891	182.191	156.161	219.987	215.701
172.343	171.519	173.626	146.736	183.115	161.893	225.706	209.538	168.739	167.408	161.91	150.57	181.285	161.605	225.457	216.959	157.303	182.705	155.191	220.111	215.663
172.903	172.504	172.659	146.321	183.097	162.491	225.538	211.201	167.33	166.413	162.837	150.815	182.286	161.239	224.76	216.544	156.379	183.52	155.323	221.317	214.468
172.186	171.62	173.064	146.711	183.068	162.213	224.661	210.717	167.165	167.169	162.85	149.325	182.767	161.758	224.423	214.651	157.001	181.928	155.592	220.593	215.243
172.753	171.918	170.857	147.103	180.144	160.71	224.898	209.879	168.395	166.295	161.954	150.512	181.32	162.11	224.856	215.691	159.149	182.495	154.616	220.104	213.845
171.793	173.358	172.633	146.963	180.284	161.653	225.506	208.561	168.316	166.948	162.733	151.159	179.314	162.081	225.076	215.227	158.862	182.954	154.313	221.407	212.366
171.612	173.326	174.773	146.22	180.276	161.91	225.939	210.099	170.067	167.597	163.533	152.261	181.641	162.471	225.02	215.585	155.342	182.609	154.604	221.086	211.616
173.561	172.839	171.44	147.774	183.855	160.76	226.068	212.091	170.24	168.524	164.035	149.847	181.556	163.782	225.522	216.687	156.931	184.219	155.563	220.505	211.531
173.538	173.901	172.498	146.714	180.244	162.22	224.4	210.051	169.825	168.137	163.15	149.511	179.989	163.875	225.656	215.423	155.93	184.165	155.46	221.402	213.052
172.714	171.622	173.043	146.308	181.015	162.222	225.6	210.703	169.847	169.534	163.68	149.555	181.076	162.904	226.546	215.578	157.182	181.083	155.37	220.473	212.819
173.18	173.129	172.433	146.582	180.494	161.762	225.022	211.122	168.267	168.602	163.123	149.342	180.67	163.936	225.336	216.252	156.251	182.696	155.402	220.345	213.05
172.651	172.549	172.552	146.828	182.279	161.644	226.527	210.69	169.387	168.159	164.163	149.391	183.243	163.832	224.479	215.632	155.485	180.382	157	221.15	213.845
172.719	172.55	171.421	145.8	181.56	160.939	225.629	210.539	169.221	169.271	164.415	150.063	182.127	164.017	224.44	214.541	154.928	181.604	155.417	221.655	212.628
173.467	171.289	169.969	146.094	182.118	161.654	225.663	211.324	169.685	168.689	165.07	150.315	182.775	164.043	224.629	214.891	154.909	180.373	155.126	220.943	212.236
172.785	171.619	171.548	146.175	181.732	160.68	225.952	211.271	170.904	167.77	164.029	149.885	181.912	163.797	226.748	215.846	154.279	180.422	154.92	220.135	213.689
174.453	172.623	171.132	146.822	180.954	160.431	226.22	213.023	170.483	168.396	163.911	150.378	180.196	163.555	223.642	217.693	156.347	178.089	155.201	220.503	214.463
174.203	172.866	171.562	147.367	180.216	161.697	225.558	212.289	170.383	168.338	164.187	152.707	180	163.289	224.994	216.142	156.508	180.085	156.046	220.407	214.818
173.812	173.317	172.634	147.139	180.263	160.797	225.022	213.044	170.191	167.724	164.622	152.355	181.925	162.466	223.997	216.91	155.669	181.072	155.975	221.85	213.57
174.556	174.533	172.167	147.919	182.018	161.139	225.69	210.252	169.566	168.586	165.559	152.966	181.085	162.955	224.288	215.723	155.509	179.172	154.608	222.184	212.577
174.011	174.721	174.315	146.824	182.59	161.153	226.535	211.383	169.672	169.672	164.861	152.826	181.554	163.761	224.65	215.851	155.636	179.553	155.045	222.635	212.784
173.443	174.209	170.418	146.021	181.982	161.762	225.4	212.017	169.436	168.349	165.549	151.261	180.945	163.329	225.161	214.885	155.731	178.477	156.09	221.39	212.497
172.056	174.013	171.808	146.814	181.678	162.419	225.727	211.041	171.553	170.954	164.749	151.894	180.452	163.408	223.822	214.892	155.636	180.263	155.406	221.771	212.686
172.952	173.098	171.344	145.905	182.344	161.952	226.163	210.564	169.619	170.991	164.532	150.221	181.203	164.254	222.312	214.709	156.494	180.136	155.719	221.943	214.323
172.714	171.474	169.071	146.944	180.623	161.566	223.393	210.299	172.837	169.475	164.483	150.084	180.162	163.466	222.955	215.437	155.18	180.966	155.573	219.28	213.029
171.852	172.49	169.425	146.587	182.348	160.775	225.657	210.738	172.457	169.702	164.249	151.609	179.316	164.843	222.259	214.946	156.174	181.014	155.716	220.767	212.86
172.036	172.342	169.009	147.548	181.357	161.548	225.807	212.473	171.277	169.712	163.054	150.85	180.35	164.631	223.006	215.797	156.153	180.521	157.371	220.4	211.758
172.181	172.139	169.094	148.212	180.047	159.171	224.931	212.072	171.334	170.319	165.942	151.672	179.07	162.43	223.054	215.785	157.065	181.577	156.678	220.283	214.143
172.558	171.673	171.476	147.023	180.849	160.241	225.061	211.251	169.987	171.117	163.961	150.66	178.236	163.126	223.108	216.442	157.889	179.978	155.723	218.809	211.873
172.668	172.073	169.439	147.827	182.068	158.732	225.553	212.211	171.126	170.498	165.153	150.971	179.376	164.496	221.483	216.229	157.841	179.689	155.514	219.439	213.597
173.29	173.356	172.635	148.556	183.928	158.242	226.593	211.133	170.815	169.861	164.691	151.407	180.135	164.024	221.448	214.722	156.465	179.856	156.011	219.027	212.671
173.223	173.549	172.489	148.243	183.752	158.643	226.375	213.065	170.598	168.889	165.092	150.337	179.548	164.253	222.763	215.405	157.754	181.915	155.185	218.142	212.925
174.509	172.763	173.564	147.141	184.52	158.906	228.878	213.013	169.604	170.116	164.569	151.278	179.141	164.535	222.736	215.501	156.995	181.098	155.307	220.717	213.28
174.272	173.222	171.421	147.987	182.374	159.006	227.739	212.015	168.967	169.572	165.428	150.229	180.615	162.947	221.945	215.983	154.711	181.364	156.017	219.367	212.683
174.549	173.248	172.144	148.125	183.519	159.153	226.774	212.565	168.642	168.573	164.785	149.869	181.063	163.893	222.546	214.804	155.695	182.068	155.732	220.65	214.05
172.017	172.873	172.931	147.906	182.175	159.31	226.024	213.074	168.708	168.967	165.825	150.981	182.888	163.782	221.082	214.293	153.282	182.269	155.616	218.516	214.975
171.457	172.439	171.312	147.078	181.583	158.964	224.989	212.939	170.237	169.708	166.009	151.212	181.231	164.907	221.786	215.959	153.157	181.015	155.799	219.562	214.413
173.192	173.072	172.41	147.552	182	158.718	225.351	212.858	169.751	169.056	166.121	151.433	181.115	164.403	220.992	215.4	152.757	180.982	155.692	220.245	214.582
171.837	172.483	172.205	148.108	182.215	159.934	225.305	213.993	169.105	168.849	168.378	152.011	181.713	165.317	223.243	214.573	153.669	181.684	156.319	220.764	214.386
171.629	172.983	171.192	148.102	183.254	159.898	225.315	213.334	170.022	168.717	168.562	151.069	180.063	164.659	223.967	214.802	153.17	181.113	158.425	220.356	216.209
172.835	172.016	171.875	147.956	184.339	161.154	225.565	214.432	168.623	167.246	168.552	151.495	179.816	163.114	223.963	214.889	152.822	181.528	158.59	219.078	215.478
173.844	174.148	172.553	148.021	181.86	159.659	225.331	213.283	168.885	168.735	167.351	150.519	180.476	164.107	225.766	215.277	154.67	180.225	158.826	220.005	214.772
173.387	172.02	171.146	147.512	182.646	160.523	226.356	213.744	169.488	167.012	164.963	149.598	179.642	163.175	225.253	214.306	154.098	181.389	158.577	221.759	213.143
174.43	171.448	172.769	148.174	182.903	160.332	227.039	212.645	170.529	167.535	165.962	152.547	180.671	163.825	223.847	214.604	155.469	180.213	158.781	221.989	214.316
174.877	172.266	170.943	148.902	183.441	159.713	227.437	211.641	170.506	169.13	163.892	152.027	180.667	163.701	225.54	213.453	155.946	180.324	159.386	223.53	214.327
174.478	173.116	170.889	148.419	184.219	160.926	226.754	214.59	170.863	168.171	165.124	150.459	178.986	162.88	227.042	215.423	155.696	183.446	158.677	221.394	215.193
173.02	172.845	170.462	146.461	183.812	160.996	225.713	213.97	170.753	167.932	165.01	150.766	179.386	165.293	225.626	214.382	156.105	182.62	158.292	221.973	217.003
172.628	174	171.875	146.918	183.803	162.362	226.185	213.455	171.133	169.465	165.286	149.453	180.86	166.522	224.106	214.738	157.357	183.117	156.771	220.72	215.149
171.92	173.174	171.695	147.321	182.638	161.202	226.483	212.693	169.618	169.306	165.826	150.729	183.609	165.675	223.227	215.031	155.92	180.757	157.027	220.536	215.374
172.811	172.853	171.716	148.867	184.577	161.193	226.713	212.912	169.498	169.064	164.723	151.821	181.057	165.467	224.565	214.929	156.217	180.935	157.523	218.658	215.431
171.875	173.011	170.108	148.672	184.376	160.994	227.133	212.601	168.149	169.581	165.444	150.894	181.613	164.452	223.005	215.158	154.923	180.616	156.994	220.484	215.084
173.144	173.814	171.473	147.198	182.793	160.498	227.389	212.727	168.56	169.336	166.345	150.983	181.344	164.895	222.479	216.198	154.406	181.179	157.376	219.194	216.019
174.213	173.236	173.022	147.025	183.954	160.611	226.707	214.067	168.075	168.974	166.11	152.054	181.142	164.001	223.65	216.248	155.489	182.362	157.8	218.355	212.834
173.195	173.391	172.694	147.61	183.566	161.043	226.371	213.058	168.88	167.894	166.141	151.239	181.14	164.643	223.725	216.824	157.101	181.19	157.412	219.036	213.913
173.174	171.703	174.305	147.366	182.556	161.212	226.393	215.125	169.08	167.975	167.414	151.845	180.317	164.948	221.668	216.645	156.532	180.938	156.511	220.27	214.967
171.666	172.145	172.513	147.197	183.381	161.1	226.271	213.845	168.654	168.815	167.905	150.617	181.146	163.931	221.389	215.088	156.305	182.47	156.495	221.201	214.831
172.538	172.335	169.773	145.776	184.601	163.24	226.711	213.608	169.359	166.882	166.734	150.498	181.286	164.121	220.875	214.226	154.738	181.551	155.815	219.748	215.05
173.74	171.162	169.684	145.049	183.996	162.31	228.057	214.568	169.632	168.578	167.272	150.678	179.033	166.227	221.748	216.883	155.481	180.153	157.531	218.022	215.721
172.563	171.824	170.694	146.338	185.657	163.272	228.803	214.794	168.674	167.131	166.218	150.518	179.928	164.441	221.865	216.66	156.751	179.911	157.408	217.71	215.21
173.541	172.037	171.275	145.986	185.823	163.904	227.083	213.198	168.215	168.395	167.008	150.184	179.633	164.551	223.026	215.234	155.76	180.404	157.12	219.573	215.738
173.949	172.306	171.172	145.267	185.44	164.613	226.284	212.716	168.451	168.24	166.328	150.122	179.067	162.434	223.145	215.988	155.34	178.535	157.417	220.776	215.833
174.258	172.325	172.342	146.327	187.669	164.306	226.136	213.089	168.907	167.458	165.71	150.999	179.192	164.419	224.442	216.618	154.176	179.748	157.631	221.353	216.12
172.619	172.054	171.888	146.7	188.554	164.249	227.318	213.284	167.437	168.609	166.801	151.092	178.857	164.911	225.329	216.755	153.065	178.244	156.552	220.373	215.099
172.748	171.488	173.506	145.59	186.7	163.843	227.748	213.273	168.429	168.05	166.041	150.675	181.192	165.584	222.077	214.929	153.252	181.089	156.3	220.712	212.618
172.126	172.372	172.668	144.753	187.145	163.676	228.49	213.437	169.222	168.473	164.789	151.871	179.075	166.088	222.82	214.974	154.714	180.723	156.446	222.428	212.66
173.034	173.108	173.768	145.652	185.834	164.371	228.106	213.066	168.992	168.632	164.33	151.079	179.239	163.055	222.175	216.498	154.53	178.893	156.449	220.976	211.999
173.351	172.625	170.861	145.845	187.486	164.895	229.319	213.516	170.72	169.084	166.525	151.447	179.34	162.836	223.253	215.232	154.72	180.402	157.094	220.744	212.743
172.532	174.069	169.632	147.253	186.24	164.557	228.27	213.795	168.509	169.511	165.963	152.341	179.453	163.063	222.871	213.198	154.784	180.224	158.038	220.522	212.271
173.712	174.564	168.137	147.283	185.46	165.458	227.063	214.341	168.688	168.242	166.8	152.94	180.044	161.975	222.66	214.175	155.922	182.053	156.2	220.816	213.064
175.258	174.257	169.206	148.031	185.691	165.287	227.69	213.405	168.049	169.483	165.621	152.456	178.068	162.839	223.655	213.633	155.086	181.187	157.09	221.158	211.975
174.61	174.326	168.836	147.796	184.278	166.387	228.242	212.785	168.638	169.852	166.342	152.392	178.123	162.235	221.859	214.455	154.049	180.555	156.26	222.735	212.658
173.886	173.442	172.9	146.668	182.735	164.928	226.376	213.633	167.723	169.665	168.204	152.534	179.453	162.149	221.5	215.778	154.182	181.267	156.423	220.185	211.813
173.752	172.393	172.163	145.566	183.253	164.039	227.716	213.49	166.742	169.587	166.584	152.063	178.934	161.801	222.373	215.469	154.675	181.007	156.441	222.334	212.947
171.499	172.533	171.025	145.744	185.158	163.9	227.349	215.041	168.462	169.862	167.648	152.709	180.884	163.036	221.991	214.164	153.939	180.645	157.74	221.94	214.548
172.863	172.001	172.556	147.018	185.575	163.685	228.109	211.832	168.392	171.322	165.217	151.101	181.203	162.748	222.114	214.665	154.508	181.658	156.136	222.961	212.361
173.312	172.387	172.542	147.407	186.664	162.334	229.212	214.174	168.926	170.554	165.8	152.36	181.79	163.196	223.079	214.415	154.21	180.344	156.719	220.797	213.244
172.635	174.047	171.59	148.048	184.367	163.435	228.288	213.933	168.666	169.678	165.209	151.38	180.636	163.994	222.462	213.108	153.883	180.43	155.75	220.732	214.31
173.032	174.371	171.825	148.137	184.877	162.23	227.633	213.541	169.331	168.691	166.57	152.157	179.022	163.386	223.793	213.862	153.314	180.749	154.856	220.074	213.315
171.954	173.851	174.997	147.247	184.676	162.422	228.885	213.67	169.426	170.583	167.091	150.978	178.709	163.677	223.45	214.516	155.108	180.633	155.825	220.639	213.369
171.646	172.248	173.411	147.855	182.136	163.318	228.945	213.042	169.192	170.146	166.017	150.994	179.046	163.303	223.157	214.511	153.838	180.473	155.996	222.111	213.868
172.8	172.701	173.839	147.861	182.811	163.926	228.047	213.05	168.613	169.819	167.145	151.19	179.643	162.534	222.647	213.397	154.029	178.992	157.034	222.253	214.526
173.189	172.964	172.949	148.767	184.243	162.48	224.636	214.433	169.02	169.793	167.671	152.087	179.302	162.48	223.862	213.87	155.251	178.587	155.679	220.767	213.359
173.616	172.636	170.414	147.289	184.951	162.673	226.509	214.777	167.211	170.01	167.688	155.344	180.116	162.477	223.071	213.081	154.6	179.023	154.707	221.452	214.044
173.358	173.794	170.613	148.376	184.318	162.69	228.735	213.542	168.391	169.579	167.549	154.631	179.829	164.07	222.525	213.355	154.458	178.585	154.726	221.055	213.521
173.701	173.208	171.278	148.633	185.066	162.747	228.833	214.54	169.636	170.333	165.515	154.515	180.065	163.261	221.56	214.608	155.226	179.608	154.65	222.146	213.496
172.946	172.856	171.383	148.614	184.488	163.118	229.747	213.759	169.45	169.258	165.671	153.596	181.317	163.449	222.186	214.857	154.629	182.539	154.775	222.184	214.596
174.936	172.393	171.458	147.909	184.247	162.428	227.166	214.202	169.533	168.782	167.334	152.56	182.77	162.636	221.811	215.771	154.827	180.955	155.299	223.303	213.826
173.232	172.351	172.952	147.894	186.221	161.76	229.715	213.584	168.495	169.829	167.548	152.755	180.826	162.427	224.179	214.733	154.726	180.545	154.984	223.512	213.655
174.361	172.103	170.852	147.076	184.582	162.543	229.956	214.336	167.401	169.868	167.276	152.543	182.257	162.55	222.817	215.059	154.477	181.799	155.803	223.367	212.796
173.812	172.755	171.341	148.738	187.479	162.849	230.302	213.99	167.171	170.006	169.4	152.134	181.488	162.691	222.74	213.467	154.415	181.182	154.432	223.703	214.636
173.478	172.816	171.184	148.605	189.38	162.265	229.83	213.259	168.245	169.732	168.482	153.97	181.417	163.214	222.25	213.744	156.343	179.042	155.467	220.887	213.731
173.071	173.253	172.319	147.946	188.777	162.413	228.594	212.897	167.486	168.03	167.317	153.407	181.497	162.98	223.046	214.78	157.018	180.241	155.419	221.336	214.171
172.545	173.199	172.486	147.643	185.316	162.691	229.761	211.46	168.457	169.594	168.376	153.645	180.097	162.954	221.017	213.709	155.332	179.323	156.131	220.898	212.402
173.146	171.591	170.81	147.448	186.002	161.214	229.306	213.877	168.844	169.737	167.684	154.198	181.318	162.983	221.516	214.833	154.392	178.376	156.634	224.003	213.142
173.994	172.148	171.657	147.096	186.226	162.167	229.538	215.435	168.855	168.059	167.763	154.189	181.473	162.714	223.148	213.857	155.383	178.952	156.163	224.445	213.339
173.669	171.965	172.309	148.303	186.184	162.684	228.059	216.063	169.633	168.777	166.122	151.855	179.94	161.049	223.351	213.723	156.352	178.721	155.609	223.844	213.165
174.476	172.637	171.71	147.84	185.962	164.141	226.642	215.39	169.69	168.318	167.333	151.783	181.89	161.733	223.476	213.706	157.13	179.6	157.479	222.162	213.219
173.493	174.241	172.785	147.464	185.682	164.504	226.163	216.532	169.858	167.459	168.046	151.59	178.769	161.282	223.419	213.555	157.12	180.696	158.928	220.96	213.994
173.248	173.907	171.529	148.023	188.111	163.93	225.057	213.065	169.691	168.001	166.058	151.916	180.051	162.721	223.143	214.879	156.906	179.477	157.757	221.634	214.539
172.99	173.486	170.583	148.304	189.252	164.064	224.305	213	170.206	168.143	166.942	152.116	180.605	162.927	222.708	214.405	156.243	178.802	158.101	222.497	214.223
174.018	173.423	172.963	147.403	187.522	164.097	224.539	211.764	169.099	168.71	165.624	151.435	178.652	161.616	223.526	214.377	156.922	182.974	159.634	222.628	215.738
174.105	173.07	171.894	147.822	188.049	163.073	225.091	214.78	168.461	168.605	165.605	151.982	179.138	162.92	223.893	214.735	156.781	179.873	160.866	222.573	216.665
173.951	173.513	172.187	147.836	187.554	163.056	224.449	213.088	169.137	168.036	167.942	154.179	179.608	162.449	224.037	215.013	155.397	178.781	158.574	221.902	216.127
173.163	173.141	170.91	146.961	186.411	160.963	224.327	215.179	168.29	170.014	168.177	151.948	180.342	163.093	223.065	214.364	154.979	180.535	159.762	221.129	216.072
172.941	173.703	170.78	147.336	186.987	161.738	223.761	213.675	168.377	169.626	167.625	153.364	180.473	162.596	223.103	214.315	154.388	180.95	159.256	222.183	215.556
174.026	173.257	172.11	148.125	187.288	161.062	222.743	213.136	169.159	169.375	167.488	153.536	179.388	163.409	222.811	213.435	155.29	180.496	159.605	221.051	216.274
172.851	172.975	171.093	148.187	187.286	162.645	222.733	214.662	168.744	169.619	168.473	153.543	178.058	163.255	221.228	214.869	156.066	178.969	159.861	221.622	215.844
172.573	173.813	171.631	148.551	187.158	162.119	224.227	212.886	168.225	170.945	169.204	153.799	178.597	162.681	222.46	217.54	157.521	179.402	159.863	223.182	216.219
173.141	173.059	171.684	147.865	189.107	163.25	224.487	212.43	168.252	170.548	170.6	153.089	178.079	162.947	222.228	215.785	158.734	180.236	158.564	223.06	215.354
173.618	174.492	173.304	148.935	189.741	161.588	225.242	213.483	168.817	170.811	168.236	153.03	178.374	163.192	222.476	216.903	157.596	180.495	157.687	222.865	215.777
173.191	174.637	172.381	148.698	189.099	162.355	224.962	213.27	169.109	169.779	168.877	153.204	179.723	163.756	223.011	218.145	157.91	180.048	159.058	220.959	215.721
171.622	173.052	172.631	149.388	189.696	163.385	224.566	213.154	168.391	169.932	165.928	153.467	178.719	163.905	223.723	215.747	156.679	179.982	157.817	222.162	214.432
173.067	172.711	172.368	149.968	187.823	165.171	224.975	212.705	167.472	169.27	166.156	153.129	179.15	161.622	222.912	215.718	156.597	181.419	156.958	221.155	215.61
172.007	172.656	172.614	149.108	188.068	165.064	226.44	213.118	168.582	170.036	166.514	152.815	178.831	160.949	222.398	215.982	156.762	181.207	159.726	221.097	215.207
171.713	172.517	171.678	149.417	187.7	163.968	225.642	212.588	168.365	170.654	166.684	155.602	178.814	161.426	221.574	215.429	156.786	180.139	157.717	220.222	215.882
172.261	172.336	172.458	148.517	185.794	164.275	225.305	210.85	169.097	170.978	167.507	153.85	177.13	162.278	222.644	216.654	156.19	180.135	158.143	220.957	216.4
171.218	172.949	173.375	148.678	188.405	163.492	225.848	213.609	170.502	169.634	166.284	152.497	175.772	163.089	223.709	214.528	156.785	180.887	158.779	221.42	215.038
172.321	172.303	172.305	148.92	188.467	162.555	227.207	211.418	169.103	169.689	169.497	152.661	177.217	162.79	222.443	215.039	156.256	182.307	158.676	221.426	215.026
173.065	171.654	176.632	147.405	188.644	162.229	225.894	212.584	168.986	170.415	166.478	154.02	176.758	163.872	222.463	216.112	155.464	184.648	157.487	222.791	214.002
173.233	171.195	173.291	147.57	188.295	160.832	226.257	212.658	168.999	169.91	168.895	153.498	178.893	163.326	222.388	214.877	156.8	183.03	156.735	221.23	215.985
173.008	172.669	172.797	149.26	187.698	160.251	226.492	212.615	169.432	170.576	170.294	153.327	179.339	161.992	222.595	214.295	155.314	182.054	156.954	221.182	213.915
172.194	171.896	173.25	148.707	189.014	161.828	225.777	214.326	168.399	171.575	166.38	153.035	179.128	164.15	221.791	215.225	156.346	181.659	157.418	220.506	213.427
172.631	173.006	172.721	148.246	189.508	162.785	225.655	213.153	169.427	171.382	168.647	152.358	178.589	163.958	221.635	214	155.591	181.881	157.23	221.826	213.766
172.73	173.44	173.926	148.268	190.076	163.912	225.256	214.114	169.182	172.677	167.92	151.63	175.439	164.373	221.207	214.941	156.953	183.846	157.574	222.287	214.317
173.356	174.031	174.003	148.776	188.009	163.066	227.278	213.121	168.089	170.151	168.382	152.585	176.53	163.887	221.941	213.929	157.142	182.757	156.961	222.507	215.327
172.799	172.431	174.287	146.651	186.242	163.417	228.707	214.742	168.565	170.896	167.084	151.136	177.284	164.295	222.051	213.17	157.549	183.22	156.765	222.687	214.1
173.373	171.69	175.479	147.653	188.48	162.362	226.827	215.077	169.03	170.915	167.581	154.014	175.998	164.55	223.871	213.279	157.128	180.864	156.334	221.645	214.597
172.578	172.679	172.833	146.456	188.769	162.556	226.394	215.472	169.098	170.207	166.82	152.643	176.022	165.553	222.334	215.173	157.538	182.113	155.52	222.495	214.852
172.237	171.879	173.489	145.459	188.519	161.442	225.525	216.114	167.261	169.588	166.531	153.194	178.166	166.125	224.024	213.845	157.495	182.275	155.389	222.45	214.882
171.512	173.064	173.99	146.847	187.615	162.947	227.339	213.932	169.217	171.081	168.09	153.773	179.03	163.804	224.198	213.442	155.64	180.564	156.548	222.634	214.555
173.069	172.772	172.156	145.725	189.954	162.202	227.533	214.08	169.969	171.248	168.662	154.045	177.462	163.957	224.855	213.484	156.485	181.162	157.136	221.785	214.578
172.959	174.136	172.328	147.075	191.323	162.725	228.813	214.655	168.755	169.959	166.878	154.243	176.935	164.716	222.789	215.007	158.529	181.75	156.56	221.249	213.864
172.45	174.153					230.239	212.141							224.492	216.088	153.656	180.836

## Sheet: Note
Raw data for Figure 4 - figure supplement 2B
very weak blue laser to minimize bleaching effect
just can see neurons
50 fps
Every column represents a trial
Date:20191213
Strain: AIB::Chrimson;AIB::GCaMP6
