# Supplementary material for: Flexible motor sequence generation during stereotyped escape responses
Source: eLife journal article supplement (doi:10.7554/elife.56942), 2020-06-05
Supplement: supp [file Figure 4-source data for Figure 4A.xlsx]

## Sheet: Summary
for Figure 4A
worm name	n	average reversal length	sem	sig	p_value u-test	multi comparision		p_value u-test	multi comparision
wen0602_Pnpr-9::Chrimson	85	4.6068	0.1658								* p<0.05
wen0619_eat-4 (ky5)	54	3.57696	0.13519	****	6.3059e-06	2.52236e-05					** p<0.01
wen0619+quan0128_eat-4 (ky5)+Pnpr-9::eat-4	60	5.24973	0.30289	ns	0.1667	0.6668	***	0.00010735	0.0004294		*** p<0.001
wen0602+quan0453(Pnpr-9::Tetx)	44	3.42677	0.22591	***	0.000147298	0.000589192

## Sheet: WEN0602-Pnpr-9  Chrimson
Raw data for Figure 4A
worm name	turn	reversal duration	note
20171023w1	2	2.06	20171023
	1.5	2.362
	0.5	3.007
	1	4.855
	1	6.036
	1	3.977
w2	1	6.278
	1	5.393
	1	5.369
	1	6.803
	1	6.48
	0.5+1	3.391
w3	1	4.058
	1	7.434
	1	4.811
	1	1.453
	1	4.55
	1	5.713
	1	5.582
	1	4.462
w4	1	5.572
	1	4.931
	1	3.209
	1	6.762
	1	5.965
	1	5.219
	1	4.159
w5	0.5+1	3.653
	1	5.411
	1	4.643
	2	2.059
	1	3.815
	1	4.844
	1	4.683
w6	1	4.462
	2	2.104
	1	3.048
	1	5.073
	1	3.775
	1	4.359
w7	1	7.232
	1	3.675
	1	4.523
	1	4.178
	1	3.079
	1	4.531
	1	3.403
w8	0.5+1	1.757
	1	1.661
	1	3.291
	1	4.021
	2	1.575
	0.5+1	2.934
	1	5.471
	1	4.173
w9	1	4.259
	1	4.682
	0.5	2.669
	1	6.499
	0.5+1	3.169
	1	9.205
w10	1	3.433
	1	4.987
	1	4.89
	1	3.885
	1	5.512
	1	4.725
	1	5.085
	1	6.541
w11	1	6.097
	1	6.625
	1	7.434
	1	6.863
	1	5.531
	1	7.258
w12	1	6.42
	1	3.775
	1	3.854
	1	5.149
	1	4.541
	1	3.019
	1	3.877
	1	4.826
	1	4.2
	1	5.248

## Sheet: WEN0619_eat-4 (ky5)
worm	turn	reversal duration
20171214w1	2	2.606
	1	3.251
	2	2.967
	1	3.796
	1	3.251
w2	2	2.989
	1	3.357
	1	2.77
	1	2.987
w3	1	4.058
	1	2.947
	1	3.311
	1	5.471
	1	4.623
w4	3	2.646
	2	2.382
	2	1.998
	2	2.522
	2	3.099
	1	3.169
	1	4.533
	1	3.372
w5	2	4.546
	1	3.19
	1	3.482
	1	4.927
	1	4.622
w6	2	3.598
	1	3.033
	1	2.987
	1	3.84
	1	3.331
	1	5.844
	1	2.431
w7	2	2.787
	1	3.734
	1	4.461
	1	3.058
	1	6.963
	0	4.813
w8	1	3.109
	1	3.799
	1	2
	2	2.827
	1	5.65
	1	3.613
	1	3.45
w9	2	3.617
	2	3.113
	1	3.109
	1	3.8
	1	3.168
	1	5.072
	1	3.077
		reversalduration		reversalduration
		85		85			* p<0.05/n
		4.6068		4.6068			** p<0.001
		0.1658		0.1658
		***		*
		0.00025734		0.02228
		reversalduration1		reversalduration2
		56		46
		3.7015		5.305
		0.15812		0.27311

## Sheet: WEN0619_eat-4 rescue
worm	turn	reversal duration
20190417w1	1	8.159
	1	4.224
	0	6.45
	1	6.979
	1	5.208
	1	9.144
	0	6.555
w2	1	5.465
	0.5+1	4.497
	1	6.95
	1	8.114
	1	6.04
	1	4.921
W3	1	2
	1	2.013
	1	3.226
	1	2.316
	1	4.301
	1	6.011
	1	6.889
	0.5	4.103
	1	2.892
W4	1	6.843
	2	8.735
	1	9.417
	0.5+1	3.058
	1	3.435
	1	4.346
w5	2	4.164
	1	4.162
	1	1.726
	1	2.437
	0	3.058
	1	4.786
w6	1	5.012
	1	4.345
	1	4.42
	1	8.023
	1	7.555
	1	6.556
	1	8.57
	1	7.721
w7	1	7.206
	1	5.224
	1	8.767
	1	9.115
	1	11.143
	1	7.524
w8	2	1.332
	2	2.15
	2	2.454
	2	2.317
	1	2.135
w9	2	3.613
	2	3.347
	1	3.058
	1	4.831
	1	6.192
	1	4.678
	1	5.072
		5.24973

## Sheet: WEN0602+Pnpr-9-twk-18
worm name	turn	duration time (s)	date
20191129w1	1	2.499	20191122
	1	1.243
	1	3.165
	1	3.378
	1	4.208
	1	1.772
	1	3.013
	1	4.451
	1	2.361
w2	1	1.605
	1	1.982
	1	5.303
	1	4.739
	1	1.407
	0	2.059
	0	1.589
w3	1	2.104
	1	3.166
	1	2.013
	1	1.893
w4	1	2.529
	1	2.982
	1	3.739
	1	5.82
	1	5.602
	1	5.616
w5	1	4.997
	1	4.557
	1	6.782
	1	4.648
	1	0.924
w6	1	2.999
	1	2.256
	1	3.452
	1	4.178
	1	4.253
	1	2.636
	1	1.71
	1	6.163
w7	1	2.937
	1	4.24
	1	3.8
	1	5.103
	1	4.905
