# Supplementary material for: Flexible motor sequence generation during stereotyped escape responses
Source: eLife journal article supplement (doi:10.7554/elife.56942), 2020-06-05
Supplement: supp [file Figure 4-source data for Figure 4B.xlsx]

## Sheet: Summary
For Figure 4B
worm	n	reversal length(frames)	sem		p-value u-test		p-value u-test multi		turn num	noturn num	turn rate
WEN0852(WEN0121 cross out)	67	5.59013	0.30866						66	1	0.985075
WEN0121(triple mutants+Pnpr-9_Chrimson)	112	2.53089	0.17954	****	2.7632e-13	****	1.10528e-12		110	2	0.982143
WEN0121+quan0340+330+352(Psto-3::avr-15)	192	3.52653	0.14734	***	0.00013475	***	0.000539	compare with WEN0121	191	4	0.994792
WEN0121+Pttx-3::glc-1	119	4.36841	0.22292	****	4.4561e-07	****	1.78244e-06	compare with WEN0121	109	4	0.963303		6 no res
WEN0121+338(pttx-3::avr-14_a)+342(pttx-3::avr-14_b)	100	4.25166	0.25623	****	1.1364e-06	****	4.5456e-06	compare with WEN0121	99	1	0.99
					p<0.05/N *
					p<0.01 **
					p<0.001 ***
					p<0.0001 ****

## Sheet: WEN0852_Pnpr-9  Chrimson
Raw data for Figure 4B
worm name	turn	duration time (s)	date	note
20190527w1	1	7.902	20190527
	1	8.145
	1	4.936
	1	7.707
	1	8.401
	1	4.663
	1	6.904
	1	7.177
	1	6.904
	1	6.751
w2	1	2.151
	1	6.48
	1	1.574
	1	4.269
	1	8.257
	1	7.389
	1	4.405
	1	7.524
	1	8.084
	1	7.661
	1	9.28
	1	5.985
w3	0.5	1.5
	1	4.148
	1	3.512
	1	2.179
	1	4.88
	1	3.921
	1	4.603
	1	9.159
	1	5.647
	1	5.389
	1	6.167
w4	0	1.09
	1	1.499
	1	2.876
	1	2.044
	1	4.314
	1	4.798
w5	1	1.332
	1	6.723
	1	4.285
	1	6.89
	1	5.798
	1	11.945
	1	9.34
	1	9.401
	1	7.554
w6	1	2.166
	1	2.543
	1	4.814
	1	3.935
	1	4.966
	1	3.558
w7	1	3.815
	1	3.997
	1	4.299
	1	6.193
	1	7.646
	1	8.766
	1	8.993
w8	1	3.725
	1	3.648
	1	8.583
	1	2.12
	1	7.585
	1	9.644

## Sheet: triple mutants
worm name	no response	reversal	turn	reversal+turn	reversal length_s(by code)
20161222w1				1	1.2869
				1	1.09008
			2	1	0.802422
				1	3.08857
			2	1	1.12036
				1	4.82967
				1	2.39213
				1	4.70855
				1	4.70855
				1	2.89175
				1	4.90537
				1	5.13248
				1	3.10371
W4				1	1.30204
				1	3.14913
				1	4.01211
				1	2.84633
				1	4.36033
				1	5.49584
w3*				1	1.423
				1	3.281
				1	0.475
		1			1.889
				1	1.483
				1	1.074
				1	0.832
W2				1	3.75473
				1	4.25435
				1	1.60484
				1	3.70931
				1	2.02877
20161227w1			3	1	0
				1	0
				1	4.98107
				1	0
				1	4.10295
				1	5.35958
				1	0.802422
				1	1.89251
				1	1.19606
				1	6.22256
				1	4.49659
w2				1	0
				1	0
				1	1.49886
				1	0.832702
			2	1	0
				1	0
				1	0
				1	3.63361
				1	2.43755
				1	0
w3*			2	1	1.02952
				1	0
				1	2.80091
			2	1	3.37623
				1	3.30053
			2	1	1.3626
				1	3.37623
				1	3.30053
				1	0
				1	2.43755
				1	0.999243
				1	0
w4				1	0
		1			5.23846
				1	4.07267
				1	3.19455
w5				1	1.96821
				1	2.95231
				1	6.10144
			2	1	2.84633
				1	2.86147
				1	1.18092
				1	7.20666
				1	2.92203
				1	1.90765
				1	4.46334
20171221w1				2	0
				1	4.097
				1	2.764
				2	0
				1	1.07
				1	3.613
				1	4.137
				1	2.846
w2				0.5+2	0.887
				2	1.393
				2	0
				1	3.674
				1	2.382
				1	2.705
w5				2	0.566
				2	0.524
				1	4.866
				1	4.743
				1	7.793
w4				2	1.534
				2	3.11
				1	1.737
				2	0
w3				2	0
				1	1.273
				3	0
				1	2.705
				1	4.3
				1	5.349
w6				1	2.482
				1	3.37
				1	4.279
				1	5.33
				1	6.54

## Sheet: triple mutants+Psto-3  avr-15
worm name	turn	duration time (s)	date
20181218w1	1	1.257	20181218
	1	0.954
	1	1.407
	1	4.238
	1	5.072
	1	4.526
	1	1.574
w2	1	1.423
	1	1.65
	1	2.165
	1	3.25
	1	1.695
	0	4.77
	1	3.951
	1	5.839
	1	2.875
	1	5.946
w3	1	2.851
	1	2.543
	1	3.551
	1	3.755
	1	3.284
w4	1	3.31
	1	4.512
	0	2.301
	1	1.182
	1	4.961
	1	3.366
20181219 w1	1	0.832
	1	3.998
	1	2.409
	1	4.486
	1	1.968
	1	3.281
	1	3.753
	1	2.452
	1	3.966
	1	5.163
w2	1	0.848
	1	2.209
	1	2.058
	1	3.679
	1	2.438
	1	2.771
	1	7.415
	1	1.848
	1	1.954
w3	1	2.256
	1	1.287
	1	3.845
	1	2.996
	1	2.436
	1	2.281
	1	2.649
	1	3.709
	1	6.112
	1	3.947
	1	3.887
	1	4.316
	1	6.738
w4	1	2.393
	1	1.778
	1	1.483
	1	1.272
	1	1.651
	1	5.147
	1	5.272
	1	4.224
	1	7.44
w5	1	1.09
	1	3.018
	1	3.602
	1	6.884
	1	4.225
	1	4.188
	1	6.767
	1	2.038
	1	2.421
	1	6.203
	1	7.206
	1	8.358
	1	4.724
	1	4.451
w6	1	1.967
	1	2.881
	1	2.393
	1	7.808
	1	4.627
	1	8.776
w7	1	0.697
	1	10.78
	1	9.563
w8	1	1.303
	1	1.687
	1	1.545
w9	1	2.619
	1	1.803
	1	1.589
	1	3.375
	1	2.907
	1	2.906
	1	2.785
	1	3.392
	1	4.769
	1	1.62
	1	4.026
	1	4.875
	1	4.279
	1	2.745
	1	4.901
	1	4.589
	1	5.951
	1	3.801
	1	4.157
	1	3.558
	1	6.94
	1	3.1
	1	5.204
	1	7.433
	1	3.982
	1	2.423
	1	3.726
w10	1	0.56
	1	0.621
	1	2.209
	1	2.892
	1	1.12
	1	4.253
	1	3.8
	1	1.301
	1	4.961
	1	0.802
w11	1	1.455
	0	1.126
	1	1.186
	1	3.239
	1	2.711
	1	3.82
	1	1.757
	1	3.507
	1	2.286
w12	1	1.362
	1	2.331
	1	2.014
	1	1.454
	1	0.909
	1	2.724
	1	4.361
	1	2.921
	1	4.704
	1	0.726
	1	2.724
	1	4.326
w13	1	1.241
	1	1.709
	1	4.203
	1	6.515
	1	2.902
	1	7.428
	1	8.856
w14	1	1.908
	1	0.393
	1	3.857
	1	5.344
	1	4.658
	1	6.63
	1	2.452
	1	5.627
	1	6.065
w15	1	0.893
	1	2.725
	1	1.892
	1	10.198
w16	1	2.943
	1	4.163
	1	2.027
	1	3.589
	1	6.434
	1	5.163
	1	1.802
	1	7.081
w17	1	0.818
	1	4.608
	1	2.988
	1	4.209
	1	3.957
	1	1.939
	1	4.43
w18	1	0.985
	1	6.965
	1	1.62
	0	6.202

## Sheet: triple mutants+Pttx-3  glc-1
worm name	turn	duration time (s)	date
w4	3	1.15
	3	0.651
w4	3	2.559
	2	2.256
w3	2	2.714
	2	2.817
	2	2.428
	2	1.135
	2	1.545
20180808w1	2	1.544
	2	2.709
20180807 w1	1	2.346	20180807
	1	4.194
	1	6.956
	1	4.723
	1	6.433
	1	7.767
	1	7.177
	1	7.813
	1	6.996
	1	7.827
	1	4.043
	1	5.573
	1	5.163
w2	1	0.59
	1	3.583
	1	3.408
	1	6.873
	1	2.946
	1	5.721
	1	5.637
	1	3.41
	1	4.603
	1	6.495
	1	3.087
	1	4.743
	1	1.954
	1	2.165
w5	1	1.317
	1	3.976
	1	3.346
	1	5.466
	1	7.524
	1	9.568
	1	3.21
	1	4.255
	1	6.389
	1	10.173
	1	7.46
	1	4.238
w7	1	3.139
	1	2.469
	1	2.498
	1	3.255
	1	4.468
	1	3.62
	1	7.226
w8	1	3.632
	1	3.572
	1	8.736
	1	3.618
	1	4.784
	1	4.693
	1	3.693
	1	3.405
	1	2.255
	1	3.255
	1	1.923
	1	2.483
	1	5.405
	1	2.878
	1	3.92
	1	1.974
	1	4.255
	1	1.591
	1	2.347
	1	0.786
	1	1.333
	1	2.514
	1	3.799
	1	1.878
	1	1.379
	1	4.83
	1	8.145
w3	1	2.65
	1	4.646
	1	4.042
	1	3.286
	1	7.752
	1	3.469
	1	5.298
	1	5.767
	1	4.616
	1	5.133
	1	5.328
	1	3.361
	1	4.087
	1	4.708
	1	4.997
	1	6.576
	1	7.217
	1	6.495
	1	7.305
	1	6.389
	1	5.56
	1	4.86
	0.5	1.893
	0.5	0.923
	0.5	4.271
	0	3.952
w6	0	9.644
	0	12.873
	0	6.118

## Sheet: triple mutants+Pttx-3  avr-14
worm name	turn	duration time (s)	date
20181228w1	1	4.279	20181228
	1	1.558
	1	4.748
	1	5.219
	1	4.724
	1	6.63
	1	7.884
	1	8.332
	1	3.739
	1	5.737
w2	1	0.666
	1	2.135
	1	2.119
	1	1.498
	1	3.391
	1	2.327
w3	1	0.665
	1	0.988
	1	1.655
	1	0.347
	1	2.059
	1	3.603
	1	0.787
w4	1	0.44
	1	1.035
	1	2.19
	1	1.256
	1	1.559
	1	3.846
	1	5.01
	1	3.861
	1	5.738
	1	6.827
	1	4.647
	1	1.12
w5	1	1.256
	1	1.245
	1	1.104
	1	3.164
	1	3.347
	1	4.271
	1	2.649
	1	4.678
	0	1.968
	1	4.521
	1	8.534
	1	8.807
	1	9.775
	1	3.089
	1	4.179
	1	4.813
w6	1	2.423
	1	2.377
	1	4.673
	1	7.414
	1	9.519
	1	6.63
	1	9.664
	1	8.78
w7	1	5.253
	1	4.512
	1	5.359
	1	9.089
	1	7.358
	1	8.13
	1	7.212
	1	7.005
	1	8.16
w8	1	2.464
	1	3.461
	1	5.37
	1	4.476
	1	5.254
	1	5.147
	1	7.101
	1	4.996
	1	9.608
	1	8.684
	1	4.845
w9	1	2.272
	1	1.196
	1	3.164
	1	1.56
	1	1.348
	1	2.439
	1	2.863
	1	1.241
	1	5.178
	1	3.406
	1	4.904
	1	3.997
w10	1	1.831
	1	2.286
	1	2.709
	1	4.855
	1	0.848
	1	4.587
	1	6.283
	1	6.565
	1	6.651
