# Supplementary material for: Flexible motor sequence generation during stereotyped escape responses
Source: eLife journal article supplement (doi:10.7554/elife.56942), 2020-06-05
Supplement: supp [file Figure 4-source data for Figure 4E and supplement 2A.xlsx]

## Sheet: AIB activated; RIB process
102.535	100.716	99.8639	105.844	104.87	102.661	131.335	123.251	125.538	266.154	263.167	235.077	198.273	219.455	235.077	225.154	210.8	168.56	204.154	210.769	208.091	191.308	137.808	135.904	151.342
104.286	103.293	102.815	103.563	104	105.218	131.448	122.586	126.71	291.8	245.333	255.417	207.909	208.833	197.273	220	208.288	202.118	224.3	222.385	192.769	204.75	138.608	136.795	153.582
103.425	103.54	103.69	102.854	105.981	106.655	130.949	123.706	126.806	263.5	261.846	251.583	203.917	212.545	189	222.94	205.365	204.771	210.615	247.5	203.231	206.154	139.693	137.171	153.581
105.291	101.833	103.864	102.855	105.711	106.622	130.504	123.184	126.664	269.417	247.769	258.75	221.917	218.636	196.923	217.46	203.154	207.8	210.923	219.923	197.25	204	140.124	137.079	151.873
103.929	103.28	103.203	105.288	104.292	106.125	131.587	125.268	128.539	258.077	259.167	250.833	208.583	207.818	204.917	226.939	206.481	210.04	210.462	237.4	210.917	204.154	139.628	137.01	151.272
104.356	104.904	101.855	104.68	105.782	105.693	131.385	123.395	127.498	284.7	251.75	249.923	221.333	213.75	185.385	226.2	202.173	209.26	216.455	221	204.833	203.417	138.527	137.856	153.457
104.756	103.53	105.46	103.94	105.758	107.032	132.194	124.304	128.213	269	252	238	215.364	209.667	209.182	218	208	212.06	231.3	212.692	195.769	198.417	139.721	137.699	153.234
106.119	103.668	104.418	105.354	108.07	105.91	131.563	124.367	127.991	288	268.583	246.75	212.667	211.5	204.833	229.52	204.577	213.2	210	220.25	193.75	212.5	139.766	135.92	154.337
103.846	104.061	104.136	104.811	105.411	106.492	130.173	125.261	127.774	284.077	268.385	245.769	224.333	207.286	206.167	225.12	210.192	211.38	209.5	223.1	198.25	198.417	138.888	137.378	153.345
103.468	104.757	106.269	105.811	106.123	106.644	133	125.732	128.958	276.75	250.385	223.833	226.25	201.5	204.583	225.68	221.019	205.26	239.3	244.7	209.727	216.769	138.88	137.484	150.903
104.244	102.847	104.275	105.539	107.127	106.465	131.639	124.248	129.011	270.385	249.615	257.846	218.083	208.583	200.333	224.44	209.923	209.36	209.583	237.2	198.538	223.667	140.839	137.927	152.184
104.22	104.955	105.083	105.814	105.444	107.333	131.953	123.993	129.845	273.923	272.846	247.615	214.846	216.583	216.583	233.688	210.904	209.74	213.7	218.769	195.429	212.538	140.199	138.013	149.908
104.195	106.079	105.2	106.744	105.091	106.89	130.353	124.214	129.819	292.5	278.083	239.167	213.417	213.333	209.333	230.66	213.942	215.24	199.667	226.25	208.154	215.538	140.247	136.851	151.705
105.431	105.538	105.229	107.365	107.051	109.38	131.978	123.679	129.024	268.538	263.923	242.333	226.417	215.583	199.923	231.66	212.481	209.7	216.5	222.923	198.667	205	142.257	139.413	151.01
104.351	105.134	105.737	106.601	106.702	106.734	133.702	124.757	128	258.5	271.583	247	220.833	229	219.333	235.896	219.14	212.52	225.9	231.182	211.167	204.692	138.346	137.888	155.571
105.29	104.653	105.702	106.657	106.811	106.741	132.534	123.269	129.626	282.167	285.8	249.833	220.667	234.308	213.182	238.796	217.385	220.66	208.583	227.538	212.25	213	140.473	136.801	151.329
105.042	107.635	105.406	107.381	105.89	107.811	131.046	125.7	130.646	290.833	258.538	245.417	230.455	233.167	210.5	235.312	220.192	213.02	214.75	240.4	207.25	215.455	141.257	138.737	151.766
104.7	106.789	104.429	107.186	107.794	106.772	131.361	124.582	129.291	279.25	286.7	258.833	224.833	245.273	218.636	238.192	223.68	208.3	201.917	226.154	200.583	212.182	140.829	139.826	151.706
104.891	105.978	105.676	105.548	106.298	106.356	130.918	125.058	128.714	298.8	283.9	247.846	229.364	244	209.667	231.458	220.66	216.896	211	241.1	202.846	210.583	140.927	138.914	150.737
105.383	105.113	107.296	107.725	105.407	106.953	132.64	125.542	129.947	280.75	249.923	254.167	222.75	226.231	206.25	236.48	217.4	214.208	218	235.231	204.667	209.167	142.5	139.314	148.251
104.949	104.847	105.842	108.76	105.199	107.458	131.131	124.257	128.909	262.615	266	266.167	222.182	233.75	224.417	234.7	220.12	217.458	209.143	241.25	196.615	202.5	144.508	139.939	151.184
104.054	105.67	105.676	106.582	106.316	107.278	131.277	124.447	129.299	276.417	272	255.385	224.833	246.417	219.417	242.375	220.68	208.56	215.364	224	215.909	197.917	141.686	138.702	149.297
104.303	105.902	104.498	106.478	105.934	108.058	130.498	125.205	128.488	263.615	277.167	267.25	233.25	231.333	193.857	237.312	225.396	218.792	202.5	254.2	220.545	211.077	143.652	138.01	149.832
104.344	106.672	106.225	107.169	106.272	107.955	131.592	124.58	127.987	277.923	292.4	251.333	228.917	238.333	217	238.75	222.708	218.058	199	233	224.182	213.818	142.222	140.134	150.952
105.092	106.468	105.606	107.669	106.864	106.408	130.892	125.379	130.357	281	279.917	250.417	222.273	244.083	217.5	245.14	225.229	212.24	218.077	232.231	200.154	210	142.987	139.481	148.135
104.723	106.731	105.536	108.202	105.886	109.022	129.832	123.742	128.885	273.462	280	269.833	216.083	235.917	212.667	240.26	230	221.479	196.643	256	213	198.231	143.361	140.041	148.901
104.342	105.199	106.744	105.506	105.597	107.388	129.664	126.404	129.929	275.538	278.154	267.333	236	220.923	220.167	232.18	226.583	216.98	215.769	219.917	220.636	210.923	142.18	139.648	149.186
104.39	105.171	104.527	107.119	106.608	106.814	130.368	125.302	127.271	269	275	261.583	239.5	224.154	211.917	241.36	228.816	218.042	222.909	236.417	204.182	213.769	143.425	139.413	149.206
105.304	104.586	105.56	106.594	106.758	107.981	131.413	124.005	129.292	283.167	275.154	262	232.455	231.615	210.167	248.417	228.896	219.34	218.615	226.167	193.167	220.167	145.248	140.625	148.757
105.911	107.182	105.519	105.978	105.59	108.089	132.17	123.233	129.564	266.692	279.25	262.25	223.818	213	211.083	242.22	219.654	210.204	236.8	230.333	198.071	212.636	144.465	140.354	147.684
105.086	103.703	106.289	106.15	106.829	107.284	131.594	123.226	128.675	295.8	273.667	268.75	230	234.75	212.615	234.56	226.08	210.6	231.455	237.333	202.455	218.917	143.521	139.212	148.051
105.602	105.103	106.449	106.306	107.351	107.498	132.441	125.911	128.987	277.417	284.5	260.5	222.333	226.583	208.909	239.875	224.788	207.82	203.167	232.167	214.833	212.769	145.538	139.076	147.074
105.981	106.268	105.093	106.694	105.572	106.868	132.49	123.84	128.642	271.308	285.5	270.917	240.364	230.273	208.833	239.979	220.615	213.62	238.3	242.667	223.083	204.917	144.251	138.451	148.734
105.089	105.669	105.564	106.674	105.431	107.365	130.639	123.855	126.924	278.667	290.583	259.5	228.5	230.833	208.818	239.62	231	211.06	218.538	224.417	211.75	222.818	145.465	137.156	148.248
103.682	106.46	104.375	106.459	106.237	106.13	131.104	124.235	128.312	303.5	302.1	263.333	220.846	220.462	200.615	234.5	229.479	222.146	204.538	237.667	211.917	209.727	143.444	139.646	147.142
104.955	107.15	104.067	106.807	108.199	106.763	130.626	124.741	128.26	283.231	273.308	263.583	231.083	219.385	207.077	239.3	231.646	210.479	211.769	219.25	208	214	143.266	138.902	145.777
105.061	105.13	104.66	108.199	106.943	106.044	130.858	124.541	127.759	269.385	271.462	249	221.417	206.538	211.5	232.34	223.583	215	229.6	222.75	206.538	203.667	142.459	139.006	147.016
103.803	105.513	105.849	104.907	105.375	107.885	132.998	124.572	127.002	288.167	295.5	256.077	225.083	211.714	203.182	237.76	227.32	208.958	209.5	225.5	204.833	204.769	141.59	137.794	146.442
103.545	104.617	104.522	106.937	107.345	106.83	131.558	125.151	128.19	275.769	267.615	265.417	204.214	211.636	199.727	239.562	227.688	214.333	213.818	225.538	208.417	203.077	143.844	138.247	147.048
103.248	106.524	105.821	107.342	107.339	107.215	130.832	123.501	128.768	278.923	267.917	258.25	224.5	213	210.833	238.25	222.096	213.32	203.846	237.417	215.818	207.727	142.949	138.273	147.615
104.369	106.443	105.324	106.77	106.109	105.601	131.435	125.512	128.069	271.308	283.583	272.5	224.462	213.643	214.833	235.708	219.385	221	217.083	230	202.5	196.583	142.722	141.58	148.41
104.121	106.656	104.103	105.192	106.109	107.375	131.876	125.1	127.33	284.231	269.769	262.083	213.417	205.071	211.167	249.188	222.306	217.918	215.167	232.667	206.364	210.333	142.577	138.891	146.619
103.327	106.258	106.344	106.247	106.731	105.142	130.764	125.077	128.863	296.5	285.417	253.5	232.833	220.091	212.308	254.646	223.333	223.312	205.091	233.917	200.154	212	142.616	139.378	146.667
103.187	107.667	105.535	104.325	107.34	107.112	130.96	124.993	128.159	284.333	266.75	268.583	220.25	224.417	209.667	243.92	219.26	214.265	211.909	219.385	221.364	204.364	142.709	141.156	149.054
104.903	107.77	106.389	108.211	106.494	105.804	129.695	125.031	128.593	309.167	260.231	269.231	220.667	209.333	204.583	244.76	226.646	217.583	198.333	251.9	206.917	204.692	141.216	140.648	146.34
103.984	106.981	105.402	106.208	106.849	105.407	130.693	124.773	129.117	274.917	272.667	282.4	219.75	221.286	205.833	243.542	229.104	223.271	201.455	237.833	203.917	213.462	142.8	138.826	146.467
104.924	105.491	104.679	105.929	107.18	106.911	130.476	124.055	129.841	280.583	280.167	245.615	213.769	198.929	200.5	235.5	229.94	216.633	218.2	226	215.417	201.929	140.968	139.041	146.221
104.576	106.058	105.409	104.984	108.201	105.652	129.737	124.356	127.02	279.692	274.333	274.7	223.833	205.077	214.75	234.673	219.583	219.708	210.727	229.083	208.818	216.273	143.248	140.708	145.972
105.502	105.88	104.226	105.907	108.076	106.472	131.331	124.144	128.005	280.538	274.833	258.833	219.538	212.286	202.083	236.154	227.46	215.62	201.545	228.5	201	203.615	139.971	140.029	145.552
103.863	105.752	105.28	105.554	106.484	106.407	129.624	124.872	129.524	284.083	267.25	262.333	222.083	215.571	194.071	232.769	220.1	216.833	206.091	230.643	190.417	207.583	142.756	138.437	146.611
105.116	106.787	105.252	107.625	106.865	106.054	131.075	125.391	130.1	281.667	282.583	263.583	223	203.929	208.417	224.731	221.083	209.938	206.545	242.083	199.833	207	140.116	139.79	147.32
104.579	105.44	104.931	105.561	108.519	107.247	129.872	125.217	128.881	274.5	263.667	265.333	223.917	210.857	209.154	240.25	224.76	215.875	216.692	227.333	195.308	211.923	143.171	138.66	146.095
104.867	106.975	103.791	105.66	106.13	107.141	130.402	125.52	128.215	274.538	278.083	261	213.692	209.167	188.692	241.28	216.25	211.5	201.583	235.4	211.545	208.308	141.294	139.486	144.971
103.622	107.804	104.256	106.137	108.704	107.697	130.463	123.644	128.835	279.083	279.167	255.25	230.667	213	204.182	237.46	214.288	214.1	202.5	230.417	206.083	216.083	142.022	135.677	146.365
104.216	106.994	104.513	106.076	106.668	106.15	131.768	126.029	127.569	270.231	263	254.75	215.5	209	202.25	234.077	218.077	214.06	193.538	224.231	205.818	207.75	142.245	138.75	145.997
102.003	105.502	104.579	107.199	108.551	108.342	129.513	126.281	128.52	260.077	257.333	250.538	220.917	220.182	194.5	237.231	217.28	216.979	201.25	233.143	214.833	202.5	143.003	140.418	144.811
102.857	107.359	104.542	106.916	106.222	105.449	130.075	125.336	128.854	308.9	263.308	276.7	213.333	214.5	202.75	229.9	226.32	210.898	203.077	220.75	196.769	200.308	142.442	140.154	145.697
103.486	106.131	103.392	106.446	106.479	108.381	129.279	124.409	128.3	289.833	275.167	278.7	221.636	222.5	205	236	221.5	212.735	198.75	237.167	209.917	211.5	140.256	139.529	144.851
104.369	106.853	104.236	104.99	106.443	108.026	129.577	124.566	126.7	284.333	260.417	243.692	227.455	197.5	204.818	233.962	226.75	222.646	212.182	232.833	206.833	211.833	140.959	138.206	144.914
103.978	106.53	105.339	107.061	106.25	106.436	131.024	125.188	126.803	281.923	266.833	258.167	216.167	230.5	211.083	239.077	228.42	217.816	196.308	221	195.846	205.231	141.905	139.356	145.631
104.003	106.006	104.077	106.243	108.391	107.247	130.591	125.198	127.522	281.154	259.333	249.583	220.833	201.545	189.462	238.115	224.462	216.292	190.214	237.818	197	210.077	142.937	136.797	143.048
102.424	105.891	105.444	106.987	106.578	108.019	127.212	123.695	127.619	289.6	275.083	260.583	208.231	213.182	208.455	236.038	217.192	211.265	199.917	222.917	195.917	206.083	142.683	138.122	146.042
101.505	106.045	105.508	106.212	105.932	107.119	128.025	125.515	126.634	292	257.385	264.917	221.273	220.818	195.909	241.558	219.958	205.673	198.25	230.917	199.769	203.417	140.152	140.898	145.387
103.874	107.26	103.524	105.808	106.968	107.24	129.709	122.12	128.344	285.1	250.167	255.667	219.75	202.071	204.917	235.058	217.917	207.596	212.636	221.357	205.077	200.833	142.858	138.497	144.222
104.74	106.377	104.412	105.354	107.91	107.249	129.727	125.841	126.907	268.455	245.385	276	224.091	212.385	206.417	235.769	224.292	209.88	188.308	225.357	200.667	195.769	141.848	138.882	144.178
104.955	105.313	103.835	105.542	107.58	106.991	129.327	124.317	127.436	275.154	257.25	252.333	214.417	213.3	200.333	234.865	227.86	204.66	215.167	237.333	206.417	203.308	142.028	138.86	146.436
105.561	104.41	104.538	105.339	107.41	107.219	128.772	126.007	126.379	273	247.583	246.692	218.333	205.5	207.182	244.84	217.604	212.12	209.545	228.692	194.091	204.75	142.348	137.937	143.234
104.577	106.211	105.25	106.194	106.244	107.68	128.212	125.192	126.554	271.308	252.538	258	219.769	211.909	207	236.481	214.173	213.604	200	230.818	212.667	202.333	140.367	139.987	145.098
104.497	106.534	103.902	106.804	106.366	105.483	131.362	123.498	127.596	280.417	254.917	252.167	217.692	213.917	199	243.06	218.365	207.98	204.25	239	206.333	204	140.028	138.657	144.146
106.487	106.302	104.867	106.565	107.285	109.689	128.284	124.926	126.798	270.167	254.692	249	215.833	208.727	210.615	239.42	222.077	211.229	206.818	230	199.333	209.25	141.684	138.126	143.196
103.937	105.407	105.506	105.869	109.375	105.177	128.79	125.161	126.623	281	245.308	254.5	230.455	217.091	204.091	233.24	215.96	214.653	187.667	226.667	192.615	210.167	140.006	136.94	144.532
104.735	107.693	104.883	107.118	107.968	107.139	131.343	125.969	128.341	270.083	244.615	248.083	226.727	207.917	202.167	233.96	208.846	207.96	209.154	239.636	189.308	218.417	140.092	138.397	143.766
104.502	106.612	103.864	106.006	108.416	108	130.837	124.459	126.942	269.833	267.2	259.8	218.5	204	200.5	240.917	215.52	215.688	195.214	228.167	197.333	208.231	139.86	138.785	142.453
104.76	106.987	103.62	106.427	108.252	107.917	129.978	125.34	125.812	276.333	247.154	242.385	219.083	209.583	188.846	238.72	222.6	210.096	209.833	227	197.923	206.231	141.32	138.086	142.401
105.24	105.443	102.307	106.432	108.132	108.728	128.242	124.845	125.678	280.167	246.769	250.917	211	211.167	208.667	239.167	215.62	210.154	208.923	225.071	209.417	204.75	141.085	138.686	144.149
103.392	106.637	102.923	107.198	108.019	107.865	128.795	125.485	126.947	278.167	262.583	250.923	201.538	228.8	200	239.184	218.125	208.92	207.364	237.833	195.833	211.769	140.212	138.962	143.291
103.294	106.875	104.914	106.192	107.143	106.747	128.617	125.191	126.34	279.667	280.8	240.385	218.5	207.167	200.167	247.204	220.083	210.854	197.75	224.75	196.769	212.5	139.625	139.87	143.898
103.57	107.246	104.201	106.346	106.263	107.974	130.034	125.16	128.368	289.3	260.5	245.583	208.333	208.833	200.923	240.583	221.6	211.22	214.846	222.692	195.182	207.846	138.505	140.333	143.071
104.095	106.797	102.65	106.331	106.978	107.541	130.424	125.086	126.347	283	267.077	267.833	221.154	217.154	196.462	242.16	216.86	207.312	206.692	221.462	208.583	200.917	138.577	139.326	142.511
103.212	106.873	103.793	105.439	107.308	107.019	130.345	125.347	125.53	280.917	269.231	235.231	217.846	214.8	201	236.837	215.212	211.64	195.462	223.333	196.538	203.231	141.047	139.524	144.452
104.489	106.282	104.624	106.471	107.208	107.913	129.529	124.535	127.132	283	284.5	251.846	219.167	202.923	206.083	237.469	222.64	214.292	194.769	227.083	199.154	216	138.883	139.343	142.819
104.486	107.859	103.666	106.332	104.747	107.226	129.162	125.072	126.837	279.167	249.154	256.231	211.917	[]	205.417	248.083	214.46	206.76	199	226.182	197.308	200.769	139.589	140.562	145.723
104.084	105.88	104.439	106.232	105.179	107.228	129.513	124.633	125.877	269.333	256.846	250.25	219	215.615	186.667	245.292	224.167	218.082	191.231	223.75	201.385	209.917	139.712	140.404	143.965
104.225	105.196	103.347	106.494	106.866	106.417	129.682	123.434	125.752	276.083	261.667	276.3	221.417	215.583	194.083	243.917	215.979	217.812	194.692	221.231	203.25	211.5	138.816	139.432	142.923
104.353	104.536	105.5	106.482	105.638	108.462	128.627	123.964	125.576	277.833	254.538	254.692	228.273	215.667	197.833	242.917	217.58	215.571	194.308	224.833	192	205.385	141.092	137.391	142.652
103.34	106.275	105.223	105.587	107.067	106.443	129.657	124.299	126.255	277.462	255	270.9	217.077	215.769	190.429	241.729	214.365	220.312	195.308	226.357	188.923	214.308	140.696	139.32	142.436
104.299	106.125	104.86	105.057	106.155	106.187	129.249	125.715	126.051	294.4	261.75	267.5	224.917	217	195.167	237.854	221.56	213.865	201.308	223.667	197.167	220.25	137.661	139.396	142.311
103.835	105.345	105.908	107.918	106.323	108.896	130.159	124.454	125.361	280.333	258.769	248.154	225.818	224.091	204.917	238.958	217.68	216.94	193	241.5	196.4	200.333	140.203	139.654	143.934
103.965	105.952	103.527	106.662	106.683	107.877	130.426	123.971	125.258	266.923	255.923	277.3	206.154	204	197.25	252.583	216.423	212.979	204.5	247	206.333	211.692	139.467	140.251	144.361
101.801	106.289	104.403	105.701	106.918	107.971	130.064	124.022	125.98	264.154	272.2	268.1	230.909	215.182	194.333	235.08	226.521	213.875	199.273	238.692	194.917	215.615	140.581	139.31	141.841
104.497	105.356	104.38	106.304	107.459	107.252	128.064	124.361	126.596	266.846	273.833	246	222.833	219.1	199.583	245.583	223.833	212.458	208.615	237.833	195.917	204.583	140.545	140.342	141.047
103.795	107.724	106.222	107.434	106.883	107.468	128.559	123.557	126.334	271.692	238.385	268.917	225.417	217.6	206.818	236.86	217.24	207.68	197.385	224.5	191.667	198	139.646	140.321	142.135
104.926	104.997	103.446	105.208	106.897	105.403	129.471	124.301	128.463	257.077	275.333	261.75	224.917	203.5	196.333	230.74	223.857	207.86	193	221.231	203.909	205.417	139.399	138.503	142.593
103.308	107.775	103.775	107.348	106.56	106.306	129.414	125.83	126.679	265.923	266.917	243.583	218.231	210.583	196.714	233.76	225.56	212.167	209.5	231.417	195.5	214.583	139.387	138.627	144.352
104.681	106.952	104.956	107.058	108.132	108.514	130.529	124.458	127.425	272.923	252.917	247.917	208.154	204.583	203.846	236.68	217.816	213.5	206.273	224.25	196.692	205	139.489	140.327	143.524
104.391	107.115	104.551	105.878	107.125	106.06	130.548	124.907	125.996	275.385	264.333	244.769	216.75	192	200.167	233.51	225.646	211.25	201.9	230.333	189.538	206.417	141.487	137.841	142.278
103.984	105.502	104.104	105.744	105.716	106.478	128.85	123.642	126.02	277.167	250.917	245.333	214.308	215	211.909	246.3	221.062	211.896	194.071	225.769	190.333	208.25	139.413	139.378	142.554
104.356	105.808	104.696	105.674	107.844	106.506	129.007	125.492	125.98	280.083	245.083	247.417	221.833	196.455	203.385	238.231	219.396	215.7	192.538	228.167	194.538	206.417	139.449	138.569	140.952
105.599	106.911	104.816	106.282	106.605	106.003	129.172	122.916	127.262	268.917	248.5	248	226.083	207.182	202.667	236.769	216.4	206.54	212.364	227.75	193.583	215.1	140.4	137.752	141.914
104.508	104.165	104.025	106.178	106.688	106.752	128.449	124.938	125.933	274.083	248.833	241.308	217.917	202.636	204.75	232.923	219.102	212.846	194.643	219.769	186.5	207.615	139.479	139.228	142.898
104.508	106.446	104.165	106.613	105.516	106.738	128.416	124.391	127.354	265.846	228	240.154	227.167	217.8	210.917	236.22	212.408	216.12	203.727	230.75	197.167	193.308	141.351	138.934	143.123
105.338	104.271	103.057	105.732	106.718	105.334	126.743	124.576	125.528	268.154	258.833	245.667	227.25	204.7	193.667	227.98	224.188	212.885	205.385	215.25	192.538	200.154	140.887	139.575	142.61
103.767	106.981	105.301	106.213	106.759	107.958	128.042	124.599	125.62	266.154	247.231	253.5	221.455	196.5	207.455	231.98	218.604	210.404	203.455	201.462	194.167	198.3	139.898	137.844	142.721
104.381	106.006	104.377	106.904	105.158	107.244	127.868	124.647	125.152	268.833	248.167	251	217.167	205.583	205	232.354	210.224	210.327	208.6	218.714	201.083	192.769	140.548	138.839	143.848
104.517	104.051	104.038	106.744	106.881	105.215	128.223	125.594	125.958	264.167	243.615	255.667	230.273	200.083	198.333	236.729	214.729	204.558	195.333	214.545	185.615	224.4	140.244	135.305	143.143
105.816	105.171	103.674	106.772	108.701	106.616	129.13	126.457	126.004	274.167	239.583	257.667	228	198.25	198	243.458	223.5	216.02	200.083	210.231	197.417	195.692	137.571	139.489	143.149
105.394	105.914	104.668	107.11	107.081	105.795	130.33	125.912	125.156	288.2	240.083	256.583	220.273	191.308	215.417	244.375	227.75	223.312	210.636	221.833	195.667	200.923	138.729	135.946	142.394
106.635	102.62	104.872	105.734	105.823	107.151	129.139	123.124	127.119	270.083	251.333	248	222.25	184.231	205.231	239.64	226.667	211.062	205.25	228.273	188.833	205.308	138.832	138.025	140.714
105.93	103.753	103.135	104.079	105.641	105.484	127.987	124.593	126.205	290.5	256	258.833	225.333	193	207.727	235.22	223.062	219.28	184.643	211.75	195.273	197.083	138.174	136.576	141.168
105.07	104.411	106.545	105.716	106.877	106.984	127.808	123.78	125.609	256	249.333	248.333	205.833	201.917	196.167	240.604	219.2	215.1	205.25	235.167	190.917	210.846	141.145	136.204	143.016
103.406	103.811	104.266	106.327	106.161	105.674	129.438	124.951	125.044	270.538	251.833	247.083	232.364	206.25	199.583	234.979	220.646	212.86	196.714	226	179.769	201	138.36	139.178	140.604
104.457	103.981	104.215	106.84	107.697	106.956	129.252	124.874	125.93	263.917	258.417	243.417	208.385	211.167	196.308	235.604	218.02	219.98	206.583	215.615	187.154	190	140.097	137.94	142.667
104.283	105.134	106.308	105.839	105.748	104.544	130.144	123.856	124.971	271.917	246.333	243.818	220.25	197.917	204.917	236.833	221.62	218.538	202.833	209.818	189	209.2	139.364	137	142.881
105.635	106.745	102.797	106.975	106.06	105.228	130.108	124.337	125.626	261.538	247.167	247.385	219.923	191.333	203.333	238.959	214.82	211.479	207	203.462	190.5	212.8	138.192	137.151	140.698
104.048	104.64	104.806	107.346	106.019	104.756	130.046	124.029	124.713	275.154	243.308	250.909	214.923	197.231	203.818	237.612	210.86	212.292	207.917	225.417	187.75	192.538	138.931	136.427	140.638
105.886	104.171	104.403	105.821	106.849	105.808	129.383	123.583	124.927	257.846	240.615	238.385	227.25	194.923	191.417	245.184	210.16	214.28	203.786	217.182	196.083	190.923	139.554	136.633	142.737
104.152	105.441	103.889	105.937	106.658	106.621	127.773	124.716	125.211	276	241.917	268.7	215.167	196	190.167	244.646	214.729	214.94	207.727	215.846	192.538	200.8	140.481	134.785	141.026
104.241	105.026	105.095	106.157	105.452	106.383	128.713	125.434	126.877	280.167	248.077	232.077	225.5	192.231	199.083	241.833	223.54	210.712	196	214.273	167.714	201.6	140.369	134.342	140.568
104.283	103.978	104.562	105.063	106.304	105.778	129.762	123.861	126.675	268.417	250.583	255.6	204.333	203.167	193.667	238.375	218.354	216.146	203.692	218.154	183.615	213.2	139.364	135.76	141.373
103.603	106.217	104.917	106.823	107.912	106.542	126.681	123.989	126.425	266.167	262.417	269.8	220.667	194.833	190.818	237.2	216.82	209.173	207	216.833	192.818	203.2	140.368	136.184	143.081
104.273	105.708	104.339	105.388	105.153	104.798	128.83	125.673	126.732	253.667	241.833	262.7	226.667	184.833	196.286	232.66	219.667	220.292	214.333	225.273	200.727	195.385	139.069	135.484	141.235
103.484	106.096	102.92	104.419	106.39	106.028	128.009	124.847	125.746	261.333	249.333	237.154	221.333	202.923	200.818	234.442	222.125	212.38	210.75	215.5	190.75	204.4	138.795	136.549	141.864
102.695	105.196	105.429	105.358	104.795	106.07	129.361	124.29	125.536	277.833	251.167	255.5	212.167	200.091	196.167	238.14	221.04	216	205.615	199.417	194.818	196.6	140.42	135.269	140.529
102.965	104.497	104.904	106.658	105.694	106.129	128.687	124.474	125.139	267.833	256	262.4	211.083	209.667	186.417	238.1	216.18	210.812	198.833	206.429	201.455	203.769	140.922	136.066	141.623
103.921	105.518	103.006	107.086	106.665	106.041	127.993	124.16	126.847	265.231	243.833	236	208	190.083	196.571	238.542	218.52	214.84	198.25	209.308	202.769	182.692	139.162	136.396	142.542
105.814	104.377	105.429	104.987	105.17	108.177	129.029	124.542	125.809	272.167	232.833	257.2	210.167	210.917	209.333	235.8	213.333	212.44	206.182	209.571	198.909	206.7	139.623	136.456	141.781
104.44	106.366	104.756	105.833	105.37	105.313	128.395	125.364	125.106	278.25	247.083	265.7	224	209.455	193.923	240.56	215.08	211.02	197.333	200.154	189.538	193.538	138.76	136.845	141.861
102.883	104.5	104.933	106.539	106.477	106.302	129.951	124.113	125.629	270.167	241.308	268.6	217.727	195.455	185.769	229.942	220.521	208.46	206.667	217	198.667	193.846	140.955	137.415	140.929
104.702	102.723	104.25	104.478	106.653	106.048	127.365	123.958	124.257	269.917	236.231	261.2	220.583	206.818	201.75	233.442	214.542	212.74	195.667	214.917	194.455	199.462	139.611	136.231	140.968
104.733	105.736	103.958	106.864	106.351	106.381	126.817	124.958	126.243	287.333	246.3	263.9	209.917	194.091	200.917	230.981	216.271	205.96	195.538	206.692	200.3	210.8	142.151	135.846	142.878
104.467	104.185	105.186	105.921	106.362	106.288	126.931	123.859	124.616	262.333	237.385	245	231.833	203.583	191.667	225.692	221.917	218.714	196.833	216.083	196.308	200.4	139.821	136.516	140.232
104.511	104.608	104.455	104.622	105.808	105.113	126.316	123.314	125.353	256.077	249.7	247.667	211.083	189.308	195.182	228.538	216.224	210.64	193.333	214.091	192.818	216.8	139.997	137.638	139.543
106.124	104.417	104.692	106.122	106.032	105.775	126.449	123.444	126.543	267.077	246.923	250.083	217.75	199.833	202.333	240.04	218.429	208.44	201.538	226	211.091	203.923	140.215	137.424	141.285
105.416	103.487	104.838	105.032	106.568	105.525	128.319	123.914	124.83	272.154	225.231	239.769	219.545	188.571	207.167	237.38	220.837	210.125	200.154	218.083	193.4	215.1	140.067	137.558	142.767
104.454	104.708	103.417	105.961	106.473	106.013	128.483	123.48	125.405	264.692	247.8	237.417	208.538	210.333	205.333	227.84	216.592	216.959	188.214	211.667	206.364	196.769	140.622	136.413	140.025
105.467	104.551	105.79	105.422	106.987	106.829	127.169	123.863	125.746	265.417	242	235.25	220.083	193.333	200	224.74	215.531	214.408	208	228	192.667	195.154	140.557	136.845	142.744
103.013	103.852	104.051	106.237	104.994	106.807	127.978	123.5	125.331	280.6	247.2	244.25	213.923	190.167	208.667	234.167	218.551	218.76	212.833	218.154	196.75	202.615	142.054	136.924	140.171
104.825	103.826	105.667	105.051	106.221	105.679	128.288	124.168	124.486	271.083	237.273	245.5	228.545	206.727	205.182	231.042	215.102	212.417	207.417	222.7	211.182	197.385	140.955	136.385	140.445
105.298	103.293	105.114	105.506	105.737	106.298	126.971	125.282	125.98	266.154	240.923	241.308	227.727	209.636	194.75	233.16	224.469	208.694	203.769	213.667	198.818	203.2	139.12	136.312	139.778
104.352	104.771	105.143	106.083	107.54	106.744	126.701	122.859	125.184	263.923	242.154	239.333	217.833	203	203.462	236.346	210.96	215.796	194.083	217.231	201.091	196.538	139.978	136.56	140.387
104.79	104.747	106.619	105.288	106.924	107.335	126.088	123.504	124.925	252.308	260.4	232.917	222.833	201.455	193.643	245.562	219.667	223.75	193.154	203.846	202	205.6	139.807	137.721	141.013
104.689	105.811	105.435	105.006	105.032	106.639	127.525	125.299	124.797	271.846	232.846	235.75	242.091	205.818	199.833	238.5	216.388	220	195.308	216.923	205.091	215.6	139.532	137.276	140.965
105.73	105.827	105.019	105.332	105.576	106.442	127.77	124.814	126.108	257.615	256.3	240.538	211.333	192.417	202.545	238.188	219.224	211.082	191.923	205.214	197.364	191	139.176	136.479	140.668
103.905	104.192	104.952	105.885	106.652	106.71	127.208	123.013	123.428	278.8	243.077	248.818	198.455	201.273	201.75	235.104	214.25	215.542	192.167	202.143	186.25	209.8	139.751	136.348	141.626
105.775	105.016	103.785	105.054	104.709	107.25	125.437	124.181	123.121	264.462	241.231	233.923	208.333	200	200	237.812	220.68	214.981	196	204.231	183.833	201	138.521	136.823	139.449
103.952	104.775	104.26	105.524	105.667	106.09	126.293	124.126	124.733	277.917	245.077	262	209.462	202.182	203	229.188	219.479	219.208	203.077	203.917	191.917	204.091	138.914	136.939	139.752
106.279	102.965	105.152	107.377	105.038	107.244	126.503	123.078	125.754	268.923	236.308	220.667	219.75	202.917	205.909	233.771	226.562	217.96	193.385	207.545	199.083	203.9	140.127	138.342	139.127
104.295	103.676	104.197	106.15	105.36	106.668	128.498	125.517	123.639	258	272.6	239.077	230.273	201.833	204.636	228.625	222.18	211.76	199.417	217	193.917	197.077	137.749	137.373	137.377
104.06	105.029	104.863	106.347	106.535	106.107	126.503	123.976	125.515	271.333	264.5	233	228.909	204.083	189.667	233.388	217.02	213.38	197.692	210.538	190.583	194.385	139.697	137.349	138.649
104.927	104.222	104.362	105.066	105.226	105.122	127.463	124.538	125.342	269.462	254.154	250.333	213.167	195.636	199.75	227.571	218.102	214.25	202.923	234.4	215.75	202.231	141.006	136.063	141.354
103.949	104.298	104.965	106.56	105.804	107.68	126.631	124.233	125.29	262.692	238.583	237	218.167	201.818	201	234.625	218.812	214.96	202.75	242.2	195.75	198.615	140.076	135.756	140.074
104.558	105.168	105.575	105.693	105.116	106.271	126.312	124.235	123.958	261	242	257.25	212.333	197.615	187.615	235.375	214.458	212.62	189.077	233.833	193.083	183.615	137.388	134.3	138.984
103.886	103.244	105.617	106.58	104.093	104.671	126.987	123.846	124.388	260.231	237.846	241.167	215.583	201.5	194.308	235.375	227.875	204.78	189.538	231.538	192.083	196	138.889	136.585	139.26
106.397	104.099	103.848	106.228	105.803	106.918	127.416	123.501	123.648	272.5	250.923	237.333	222.583	205.455	207.154	231.577	230.42	212.7	191.417	225.769	194.167	196.385	139.994	135.904	140.638
103.744	103.678	106.263	105.535	105.375	106.92	125.633	122.188	124.166	274.231	249.077	244.25	216.917	212.455	195.25	223.077	213.846	212.122	207.417	230.846	190.692	198.167	139.076	138.455	138.824
104.353	104.016	105.272	105.706	105.441	104.555	126.653	122.321	123.374	262.077	239.385	229.462	210.727	205.833	190	234.458	214.346	208.918	196.5	219.615	192	197.846	139.506	136.977	140.295
103.918	104.793	105.208	105.019	106.457	106.532	125.559	123.027	124.342	269.75	272.7	235.833	210.308	203.5	206.636	230.92	220.981	210.551	199.308	233.5	206.385	207.308	139.927	137.968	141.673
103.442	104.639	104.415	103.278	106.452	106.166	126.275	124.011	124.199	271.083	234.615	229.231	221.083	213.083	190.182	233.808	215.173	216.245	194.083	213	185.643	210.6	139.589	136.364	140.115
104.432	105.497	104.325	105.429	106.16	106.42	127.37	123.991	122.024	258.917	244.923	234.583	219.182	209.385	207.833	229.48	223.54	211.633	191.167	223.462	193.417	205.4	140.354	136.658	140.111
106.183	103.238	105.482	104.83	105.386	104.345	126.535	122.946	123.453	270.25	260.1	231.583	211.231	206.846	188.615	225.615	220.16	212.667	202.333	244	196	201.1	139.981	136.556	142.006
105.322	103.813	104.968	105.497	106.13	107.551	127.375	122.381	123.645	253.923	248.385	236.583	211.167	192.75	190	224.385	217.735	216.958	215.417	228.308	201.615	197.615	139.604	138.8	139.016
105.268	105.181	104.997	105.3	106.242	105.81	128.715	123.089	123.392	258.538	281.5	244	214.25	191.583	205.75	228.42	209.635	207.6	201.583	211.846	195.077	217.9	139.728	136.807	139.674
104.921	103.61	105.409	105.852	105.484	105.466	126.611	124.496	124.912	268.083	251.417	235.154	205.154	212.75	196.833	227.24	209	215.417	197.154	210.538	196.571	205.7	140.421	135.062	139.987
104.933	104.709	105.514	106.054	106.365	106.365	126.828	123.198	124.135	261.75	259.5	229.333	207.462	207.75	195.5	232.49	205.92	213.292	206.3	221.5	194.308	207.6	139.775	137.311	139.76
104.446	103.683	105.105	105.611	105.317	106.269	126.117	123.717	123.641	274	230.154	232.462	218.083	203.167	198	231.458	221.72	208.979	187.308	214.231	194.25	206.7	140.073	137.146	140.748
106.006	104.092	103.974	106.309	105.378	106.064	127.088	125.454	123.765	285.833	266.3	244.538	217.5	199.462	195.417	234.75	207.82	216.146	193.538	207.357	192.182	210.3	138.047	136.86	140.595
103.939	103.638	105.383	104.14	105.71	104.702	128.56	124.285	124.267	269.333	273.2	243.923	209.615	201.583	194.75	236.188	219.771	212.354	212.3	232.4	185.308	206.8	141.481	137.962	137.611
105.768	104.705	103.061	104.092	105.579	105.635	127.098	123.104	124.852	263.333	253.167	235.615	212.583	187.077	208.538	233.354	216	210.98	203.769	228.923	207	195.692	138.595	138.304	138.612
106.07	105.058	104.203	107.361	107.1	105.82	127.566	124.48	124.278	284.167	247.583	250.5	207.077	210.6	185.143	236.417	215.615	207.75	195.071	218.917	200.818	194.857	139.377	138.756	138.942
103.105	103.663	104.825	105.07	106.981	106.104	125.949	122.573	123.929	261.667	235.231	261	205	198.615	193.5	236.14	225.94	213.286	201.667	209.929	197.833	196.8	139.33	137.307	139.879
105.965	103.603	103.924	106.353	107.598	107.763	127.298	124.316	123.281	266.667	239.308	253	212.833	205.7	193.5	232.292	217.173	204.146	193.929	223.583	195.154	207.6	138.984	136.769	139.453
104.07	104.683	104.354	104.705	105.934	107.554	127.34	124.958	123.967	251.25	237.154	234.538	212	180.154	193.083	225.615	216.78	209.245	196.857	221.727	195.667	227.9	140.47	135.218	138.332
102.717	103.939	105.448	105.86	105.054	106.916	127.491	122.81	123.276	259.5	242.667	261.1	214.417	193.308	190.909	234.062	213.038	211	205.75	213.154	194.818	194.286	139.684	137.769	140.508
106.379	104.131	105.613	106.224	104.99	106	125.543	124.738	124.409	261.154	269	220.308	206.727	188.846	206.833	229.521	214.8	209.312	189.917	217.846	182.417	210.7	139.984	137.471	137.178
103.949	104.016	104.492	104.514	106.351	106.369	126.856	124.66	123.333	246.769	233.154	259.5	222.091	208.364	201.75	232.771	218.34	213.521	199.929	221	206.818	186.308	140.054	137.451	138.788
102.971	104.576	105.378	105.516	107.175	105.689	127.834	123.969	123.12	251.077	244.231	230	200.917	196.273	201.25	229.56	214.327	211.583	195.417	205.5	192.25	211.8	138.744	136.019	139.186
104.414	104.127	105.12	105.221	106.088	104.383	127.086	124.448	124.129	263.5	275.3	254.5	214.917	185.462	205.545	233.34	215.84	214.184	187.462	215.231	200.231	195.857	140.775	135.652	138.832
104.487	105.513	105.032	106.087	105.978	105.051	128.669	124.306	123.183	257.083	240.154	258.7	218.917	209.75	194.167	229.3	210.7	206.385	204.5	217.917	190.077	196.231	139.604	136.647	140.92
102.949	105.633	104.524	104.379	106.676	105.987	127.996	123.231	123.346	255.333	236.417	236.923	214.182	214.364	201.545	226.64	218.375	200.6	194.583	217.75	195	188.692	138.378	138.244	140.994
104.716	104.456	105.114	105.205	105.119	105.812	126.115	124.242	124.526	258.583	259.8	226.462	200.417	202.5	196.364	229.469	222.24	209.571	196.917	214.75	194.167	195.231	138.896	137.926	139.127
104.949	104.937	103.889	103.796	106.497	103.746	127.711	125.175	122.427	255.583	246.462	223.538	207.545	194.667	207	235.592	222.417	200.771	187.692	213.231	201.182	215.6	138.33	136.737	138.788
104.332	103.551	104.39	106.76	106.42	104.535	126.811	122.809	122.642	253.417	243.833	226.923	208.273	194.727	187.231	229.735	225.25	213.021	187.25	222.417	199.091	197.214	138.937	137.964	139.717
105.051	103.541	106.126	104.39	106.174	105.784	127.037	123.307	123.54	277.5	245.455	262.6	220.182	203.154	186.692	232.938	218.58	204.86	198.429	220.75	183.667	215.3	138.896	136.769	138.811
105.141	103.256	106.877	105.722	105.343	105.898	126.763	121.002	123.749	255.667	237	257.3	214.364	201.727	188.462	230.104	222.146	214.3	196.182	222.083	186.077	200.154	139.249	136.314	140.468
102.863	104.054	105.456	106.304	105.396	106.845	125.794	122.819	124.489	259.538	235.917	262.4	212.917	192	203.364	228.979	223	208.521	196.462	216.667	190.545	213.8	139.899	137.657	139.759
104.955	103.771	105.181	104.149	104.843	106.578	128.104	124.085	123.029	264.083	262.2	249.909	203.333	202.273	195.182	229.917	220.4	211.062	227.5	216	200.25	224.4	140.876	137.68	139.75
105.308	104.019	104.869	106.058	106.927	106.263	128.078	124.227	123.462	241.385	237.462	237.583	202.154	205.583	204.333	220.333	216.46	206.354	195.75	220.923	183.667	191.462	138.775	137.241	138.981
104.763	105.676	105.661	106.115	107.551	105.234	127.813	124.439	124.282	269.667	247.917	244.333	216	198.182	200.727	220.062	227.562	213.521	183.833	216.462	196.333	203.6	139.551	136.748	140.06
105.721	104.677	104.54	106.147	105.652	107.41	127.498	123.062	124.624	272.9	234.583	264.2	209.364	205	200.636	219.98	217.167	199.673	198.231	216.538	200.273	197.1	139.184	136.936	141.808
104.962	103.77	106.553	106.111	105.811	105.83	129.755	121.702	124.77	262	232.5	236.833	210.167	190.154	197.818	223.878	223	210.292	209.273	207.231	188.333	193.6	142.326	140.003	139.427
103.402	105.57	104.256	106.95	107.112	105.402	129.645	123.552	124.664	240.154	244.5	230.538	208.917	210.917	186.357	221.5	212.729	211.68	186.538	221.231	196.083	188.385	137.899	138.502	138.933
103.987	104.31	105.434	105.326	105.168	106.022	129.996	123.932	123.586	264.8	244.833	259	211.182	202.545	198.091	233.979	225.122	203.438	192.417	215.231	185.846	211.3	138.709	136.766	139.01
104.01	104.08	104.061	105.937	106.875	106.259	128.15	124.134	124.732	270.2	237.923	238.833	206	206.417	197.083	227.5	221.837	205.375	192.385	212.923	194.583	210.9	138.022	136.962	139.785
103.361	104.736	104.151	105.374	105.856	105.858	125.94	121.881	123.272	253	236.769	240.833	214.25	206	199.75	224.365	226.729	208.06	194	207.25	190.083	191.857	138.273	137.752	138.133
103.734	105.123	103.611	104.192	106.589	106.477	127.181	122.478	122.927	254	256.3	258.583	209.455	197	202	226.1	219.184	206.16	187.357	216.5	182.333	199.667	137.503	137.772	139.756
103.532	105.177	104.528	107.35	105.417	107.386	127.665	120.542	123.909	254.833	232.231	238.75	199.583	197.727	203.538	227.7	222.854	214.021	202.571	234.4	187.917	183.154	136.168	137.705	140.886
103.308	106.174	105.411	107.516	106.146	106.601	126.357	123.869	124.568	262.3	270.2	238.308	214.333	202.5	191.769	217.442	226.625	207.52	200.167	223	189.75	185.667	138.367	135.644	138.88
102.528	104.259	105.144	105.521	105.899	105.974	127.078	120.872	124.555	295.3	243.615	248.846	218.5	208.5	194.917	221.596	224.771	201.44	192.182	214.308	191.727	202.7	138.288	136.505	139.434
104.326	104.56	103.933	105.877	105.08	105.819	126.594	123.219	124.888	285.4	248.7	233.538	207.167	202.083	207.583	219.115	222.583	205.34	189.929	227.462	196.692	182.615	139.752	136.34	137.772
102.042	104.406	103.958	104.791	106.92	104.553	126.86	122.345	122.969	257.154	245.75	238.538	198.385	205.167	199.833	219.115	223.792	200.5	187.083	216.833	188.923	192.462	139.272	137.929	140.557
104.086	103.214	105.689	105.457	105.285	106.423	128.007	122.848	125.243	265.091	228.538	246.231	201.167	195.692	195.5	217.885	223.25	211.875	183.929	229.6	203.75	191.417	137.595	136.231	139.547
104.128	104.447	105.185	105.422	104.712	106.205	126.521	122.438	125.785	276.8	240.3	235.923	208.833	197.25	202.364	221.24	218.792	207.438	189.923	211.5	192.583	195.333	137.867	136.218	137.829
103.492	104.901	105.291	106.282	108.442	104.757	127.009	123.303	123.447	273.333	237.154	244	214.333	198.636	189	219.292	220.98	203.4	194.818	203.25	196.083	202.667	138.459	136.085	139.092
104.125	105.719	104.965	105.082	105.545	105.438	126.628	124.562	124.418	267.077	244.083	241.615	210.583	208.455	191.417	226.939	214.64	205.54	199.917	212.462	184.833	212.333	139.699	137.177	139.307
103.601	104.386	105.281	107.447	104.155	104.156	128.487	123.383	124.729	244.308	243.077	257.3	215.583	196.167	198.545	230.78	219.167	210.938	190.5	212.167	190.333	195.923	137.497	138.203	139.571
103.201	105.219	103.332	104.361	106.052	107.353	127.906	123.13	123.761	258	241.25	239.154	200.545	187.615	185.538	222.16	218.042	210.354	200.833	212.462	190.5	192	137.549	137.468	139.406
104.399	105.05	106.792	104.708	105.057	106.142	127.923	123.152	124.936	258.231	232.25	246.308	212.417	194.5	197.545	226.78	221.75	204.92	197.417	216.154	188.417	187.308	138.984	136.43	141.135
103.837	106.333	104.75	105.911	104.594	106.216	129.739	121.805	123.798	268	254.917	225.846	203.833	192.833	188.25	221	219.229	213.167	194.083	213.154	193.917	201.308	135.41	136.437	141.09
104.463	103.768	103.817	106.442	105.31	106.939	127.356	122.44	123.878	243.615	244.25	248.5	208	199.364	197.727	219.827	220	212.292	200.077	209.917	191.923	211.2	137.772	138.228	136.129
102.267	103.564	105.109	103.74	105.953	104.035	127.9	122.808	124.971	250.692	237.25	240.538	202.917	204.455	199.636	222.212	216.583	206.388	198.667	206.923	186.167	202.833	138.556	137.452	139.554
103.381	103.975	105.538	105.213	105.269	107.849	128.394	121.769	122.333	253.538	244	262.6	203.75	194.636	209	216.75	217.449	212.583	193.462	216.923	179.143	198.769	138.413	135.8	136.734
102.767	103.323	105.994	105.849	106.111	104.77	129.73	123.504	122.371	254.615	229.462	226.769	226.667	193.583	194.667	223.615	229.229	210.25	189.923	205.462	184.167	213.8	137.987	136.975	138.793
103.767	104.716	104.631	105.926	106.965	105.141	127.654	124.034	124.504	251.538	241.615	258.9	198.154	197.417	205.091	222.26	221.653	203.592	197.667	216.231	190.385	205.4	137.679	137.41	139.6
102.681	105.462	105.093	105.307	107.218	105.041	126.697	124.325	124.427	255.182	234.077	232.615	194.214	197.333	207.909	219.26	219.083	206.646	190.583	203.923	188.154	212.1	136.331	137.474	139.61
103.23	104.111	106.581	104.564	107.641	107.974	127.918	123.212	125.011	255	233.333	235.077	209.231	201.75	195.818	224.854	216.857	215.292	191.077	209	191.615	202.308	136.528	137.01	137.633
103.719	104.981	103.873	104.934	105.394	106.05	127.396	122.239	124.486	246.25	232.462	261.4	215.5	198.5	200.545	227.816	223.792	213.833	195.5	207.417	203.75	205.4	137.475	135.693	138.366
103.946	104.151	104.924	104.139	105.744	105.713	129.714	122.942	124.645	245.846	229.5	254.3	213.308	188.833	202.182	216.68	214.347	206.229	193.75	204.083	187.583	195.154	138.521	137.631	137.298
104.621	105.051	104.86	104.629	106.735	105.545	127.619	122.72	124.329	254.833	242.154	250.8	215.083	208.667	201.083	225.708	211.438	206.417	190.692	208.385	184.833	215.5	138.092	136.908	139.217
103.665	102.763	105.937	106.775	106.556	106.846	127.064	121.128	124.02	242.583	249.583	245.833	198.917	194.75	194.167	213.08	220.729	209.14	203.385	203.538	188.167	195.308	136.857	138	139.358
103.646	103.997	104.962	106.327	105.106	106.205	128.104	123.925	124.598	247.25	243.167	231.833	212.273	194.75	197	230.625	218.333	217.583	199.385	208.25	198.909	206.8	138.88	137.484	138.729
102.538	103.684	105.613	104.684	106.176	106.571	127.659	124.52	122.92	253.75	231.083	237.923	220	198.333	208.364	228.771	218.875	212.312	181	204.083	183.308	205.9	135.848	136.354	136.822
104.234	104.994	104.533	105.316	105.695	106.943	126.546	122.143	123.007	256	250.583	257.5	209.667	182.692	190.583	237.188	219.479	209.531	194.364	212.917	186	210.4	138.677	139.703	136.784
103.212	104.772	105.159	105.12	105	106.094	125.565	122.673	123.161	247.583	242.333	243	206.167	190.231	201.462	223.22	224.208	209.896	209	192.615	187.538	206	137.503	138.27	136.022
103.734	104.859	104.439	104.417	105.22	105.778	125.927	124.11	124.319	244.75	238.583	242.154	208.364	187.462	203.833	220.143	221.854	210.021	202.75	233.7	204.333	185.231	138.54	137.841	137.556
104.918	103.105	104.889	106.532	106.078	105.801	128.962	121.662	125.648	245.667	243.462	240.923	209.273	197.091	197.923	221.396	219.312	209.653	197.75	208.75	181.077	202.1	136.984	140.188	136.899
104.003	103.843	106.154	105.51	106.54	105.886	128.179	124.4	123.552	250.583	239.154	264.6	201.909	200.75	196.273	221.423	223.347	216.354	202.917	206.846	190.833	198.5	138.906	137.31	136.991
105.099	103.965	105.513	105.971	106.201	106.272	126.611	122.305	124.332	252.167	255.4	248.769	202.083	185.308	194.364	224.354	224.449	211.979	202.083	194.385	187.385	217.6	139.829	139.54	138.472
103.328	105.612	105.066	104.68	106.891	106.099	128.093	122.473	124.4	248.083	234.769	254.1	202	199.75	194.091	217.66	224.612	213.312	184.462	215	188.917	210	139.148	138.432	135.163
103.911	105.193	105.943	103.808	106.141	106.19	127.982	122.744	122.598	255.583	237	234.385	213	198.3	193.077	221.792	222.286	209.833	203.917	221.5	189.25	193.077	138.628	138.302	137.468
103.738	104.147	105.566	104.861	104.208	105.798	127.15	123.741	123.671	245.75	237	238.077	199.167	201.083	195.25	218.449	216.896	207.167	193.909	217.091	182.231	203.308	139.289	138.013	137.667
106.126	105.413	106.174	104.661	104.854	107.107	125.871	121.836	125.659	240.5	246.917	248.2	200.5	205.455	201.455	222.542	219.327	212.375	183.417	204.077	190.083	204	137.743	139.198	137.231
104.603	105.237	105.025	105.913	104.939	105.076	127.307	122.976	123.04	251.154	234.167	244.636	210.583	198.25	197.636	231.458	224.163	210.708	180.833	212.1	191.083	203	139.162	137.607	135.34
104.713	104.452	104.595	105.572	104.565	104.378	126.707	123.251	123.427	251.167	240.308	260.9	196.417	187.25	193.583	222.333	228.612	211.875	185.429	203	193.077	201.692	137.902	139.372	137.696
103.811	105.038	104.398	105.81	105.278	105.781	126.39	122.853	123.752	248.5	236.615	235.385	199.333	188	200.167	220.188	216.958	210.271	186.692	214.182	195.909	201	139.87	137.744	138.066
104.151	105.328	103.736	104.668	104.568	106.085	127.819	124.314	124.539	252.75	235.615	257.1	201.667	184.308	203.545	226.188	226.271	210.833	185.071	206.231	195.077	212.3	138.311	138.381	136.196
104.367	105.682	105.697	105.37	106.099	106.326	126.629	122.586	123.786	234.833	222.769	240.75	202.909	192.769	199.5	225.5	217.796	212.625	198.583	215.462	189.4	201.8	138.968	137.259	135.978
104.476	103.085	105.545	105.108	105.537	106.202	127.732	122.712	123.533	228.846	226.769	258.7	201.833	197	196.818	226.26	229.062	212.396	196.667	205.385	185.917	193.385	138.498	139.295	134.308
104.332	104.654	104.074	106.557	106.307	107.119	128.5	123.511	124.467	241.273	238.167	260.2	200.364	199	195.083	226.854	227.375	212.562	193.385	202.077	201.091	192.462	139.07	137.859	135.946
103.848	104.298	104.211	106.187	106.073	105.462	128.347	122.638	122.861	236.538	241.583	266.6	209.5	194.923	206.083	218.096	225.833	207.271	193.769	204.462	198.545	209	139.138	138.289	135.127
103.921	104.449	104.271	105.563	105.245	105.607	127.658	123.33	124.257	243.545	232.917	260.1	184	201.364	198	225.958	224.917	216.042	193.308	219.833	181.5	209.1	137.838	139.751	134.558
103.331	103.955	105.109	104.836	106.962	105.861	128.559	122.273	122.971	259.25	245.167	240.917	197.818	184.231	199.273	224.708	222.083	209.188	194	210	191.154	208.5	139.737	138.502	136.541
103.934	104.75	105.125	105.304	107.048	105.747	126.732	122.312	123.615	238.667	240.083	241.615	195.231	201.923	197.583	223.833	225.271	211.18	199.615	209.917	186.429	188.615	136.333	137.315	135.468
103.685	102.154	104.609	106.104	105.41	105.243	126.65	122.638	122.993	250.417	231.667	246.583	199.846	189.2	203.333	227.938	222.521	206.46	194.077	198.182	195.182	179	139.772	138.188	132.946
104.202	104.686	104.952	106.268	104.728	105.211	126.682	123.929	123.185	252.9	232	241.833	206.833	184.154	195	220.917	223.812	214.125	190.429	204.385	194.818	193.462	138.877	136.672	136.071
104.088	103.291	105.228	105.475	105.744	105.692	127.454	121.848	124.827	230.077	239.167	235.846	204.917	195.727	203.231	220.688	215.5	208.708	196.9	213.615	199.909	182.333	136.655	137.079	136.14
105.032	103.666	104.093	105.092	105.596	106.716	126.962	121.413	122.378	240.917	222.385	231.917	208.909	195.091	193.5	224.667	217.16	207.125	202.538	195	195.333	205.5	137.759	136.478	136.565
104.923	104.651	104.619	106.767	106.468	106.104	125.75	123.274	124.13	240.167	235.385	235.917	190.417	185.364	189.615	216.958	219.333	207.479	200	201.3	206.636	200.091	135.846	139.847	137.762
102.696	104.583	104.452	105.038	105.387	104.788	127.684	122.011	123.567	248	229.077	242	209.25	204.182	181.714	221.667	219.417	205.812	186.692	214.9	199.636	190.769	136.734	139.696	135.367
103.987	105.572	103.587	104.968	104.994	106.17	126.915	122.501	123.704	242.833	228	250.583	202.083	199.154	201.692	221.125	215.667	207.062	187	213.083	185.615	196.846	138.157	136.213	136.877
104.613	104.623	104.222	107.077	106.668	107.147	126.793	120.416	124.229	245.833	229.667	265.8	209	200.75	204.455	212.82	219.958	210.25	181.769	199.833	189	192.385	136.321	138.132	136.327
104.188	103.978	104.406	105.123	106.038	105.549	127.091	122.96	124.577	231.5	229	265.2	213.727	195.25	194.5	222.917	223.959	209.25	195.917	207.769	195.769	191.154	138.616	137.524	136.703
103.827	102.929	104.327	105.303	106.064	105.978	126.788	122.208	123.996	247.083	226.385	243.091	210.455	203.167	198.333	220.16	223.833	207.66	193.917	223.667	192.385	197.417	137.367	137.495	135.423
104.137	103.62	105.641	105.019	106.961	105.351	128.323	122.483	123.376	242.25	226.154	232.692	211	192.333	198	219.792	219.959	211.104	206	201.231	187.667	199.846	136.864	137.321	137.788
104.377	103.39	106.813	104.575	105.76	104.516	126.071	122.501	122.531	229.417	237	264.083	202	201.083	187.769	216.354	225.812	208.76	193	207.462	188.083	196	138.032	137.149	135.006
104.895	104.646	104.181	106.478	105.89	107.622	126.715	122.959	124.757	237.417	239.5	242.538	207.333	184.083	184.929	222.146	227.061	207.188	205.333	226.5	192.917	197.692	139.092	137.083	134.013
103.687	104.514	105.653	108	104.429	105.895	125.433	122.565	123.051	230.308	233	243.333	201.417	199.182	203.909	222	225.429	202.72	210.3	218.909	185.385	210.2	139.248	137.311	135.656
103.623	105.196	103.868	105.627	105.748	105.545	126.606	125.022	122.956	243.917	230.583	238.917	204	202.583	190.182	224.204	221.898	212.24	195.583	202.538	192.8	200.167	136.502	137.19	135.292
103.114	103.756	105.587	105.886	105.607	105.08	128.408	121.92	124.033	242.083	229.25	238.25	202.455	198.636	199.667	220.833	231.854	211.75	207.417	209.929	187.615	186.692	137.899	135.765	136.32
103.888	105.853	102.638	105.313	106.686	104.924	127.055	123.051	124.755	230.083	248.083	249.167	209.917	182.846	206.364	222.042	227.333	211.104	202.545	217.917	185.083	206.9	137.981	137.92	135.492
104.929	103.673	104.953	106.156	104.753	105.9	126.681	123.773	122.271	242.167	237.917	244.308	205.917	207.818	204.077	221.625	225.312	212.354	194.231	220.909	193.154	196.583	136.975	137.598	135.505
103.936	105.625	105.699	104.612	105.484	105.958	127.441	123.187	124.517	224.833	237.583	241.308	203.417	215.182	196.667	215.562	223.438	214.021	190.286	199.429	201.917	205.417	135.66	137.603	135.683
104.503	103.323	104.596	105.597	103.429	106.971	126.463	124.449	122.802	238.833	245.583	242.077	205.667	187.583	195.231	219.5	224.375	206.26	192.818	208.769	192	205.538	137.079	138.092	135.292
101.952	103.628	105.872	104.751	106.412	104.606	127.515	123.195	122.227	244.917	248.083	245.25	191.833	184.667	197	219.521	223.562	211.542	201.167	209.308	198.917	194.231	138.434	138.058	135.54
103.132	104.723	104.651	104.173	104.475	105.685	126.834	123.083	124.627	227.385	238.6	246.333	200.833	190.917	198.231	220.082	227.875	208.88	205.167	209	189.364	186.538	137.894	136.61	137.6
103.302	102.61	103.506	105.299	105.858	105.038	125.894	123.779	122.366	227.25	239.308	254.917	203.455	181.417	190.5	214.604	218.667	217.667	186.077	215.1	188.538	200.692	138.267	136.237	135.252
104.569	104.788	104.898	106.476	105.152	107.142	126.584	124.32	123.852	242.75	229.083	243.083	191.583	192.364	196.833	220.521	220.938	207.271	207.231	205.417	184.417	207.077	136.734	136.691	135.079
103.614	103.682	105.815	106.135	105.054	105.704	126.082	123.245	123.731	229.833	236.769	253.25	199	182.167	200.385	221.854	221.292	215.875	189.308	207.25	179.25	216.3	137.734	136.74	136.57
105.338	104.103	103.676	105.842	105.592	105.575	126.039	123.424	124.588	232.583	232.077	242.923	207.364	185.909	209.636	223.51	224.26	208.417	185.667	202.667	187.636	204.846	137.487	138.953	136.263
104.83	103.796	105.639	105.648	105.704	105.372	128.802	122.512	124.276	241.833	229.077	243	191.077	193.167	202.083	230.917	226.167	208.938	193.636	199.25	179.286	187.231	138.74	136.791	136.727
103.225	103.379	106.379	106.378	105.967	104.776	126.388	124.418	125.071	242.333	241.833	246.917	201.417	208.333	205.545	219.653	226.396	217.708	199.182	206.154	184.846	200.769	137.121	139.318	136.4
103.545	103.234	104.646	107.696	104.956	106.596	126.738	122.133	122.075	243.083	246.25	239.846	202.583	192.769	202.833	230.354	222	205.66	201.182	187.462	194.273	196.692	137.323	136.801	137.186
102.42	103.675	104.592	105.965	104.968	106.205	125.889	123.238	123.814	237	240.417	254.25	200.333	202.25	203.75	214.812	217.396	212.16	185.077	210.636	194.333	201	136.374	138.461	135.91
103.51	103.66	104.274	105.149	103.582	105.808	127.131	122.163	124.576	221.833	243.083	250.917	196.667	195.667	196.25	228.5	217.25	212.417	193.083	219.583	193.5	204.5	136.571	136.81	135.817
106.122	102.34	106.268	106.183	103.218	103.856	126.031	123.069	123.183	246	251.083	244.667	191.167	179.538	193.5	228.562	219.939	210.312	201.923	207.571	187.083	206.3	136.029	136.231	136.402
104.907	103.942	104.54	105.748	106.156	106.258	126.922	121.98	123.123	229.25	241.333	246.667	208.833	199.417	206.583	218	216.917	216.188	198.909	217.231	185.769	203.1	137.097	137.881	136.886
103.07	102.231	104.875	107.304	106.126	105.43	126.752	122.284	123.838	241	237.417	240.154	202.417	189.154	190.5	223.75	212.292	214.25	202.455	207.083	191.583	202	137.261	137.163	137.655
104.217	103.26	106.174	105.035	104.391	105.125	127.224	121.852	124.71	241.833	245.75	241.583	211.091	190.818	192.308	228.125	223.375	212.12	185.769	211.917	187.154	204.7	138.497	135.893	135.981
104.272	102.272	103.468	105.473	102.817	107.342	126.958	122.526	123.692	247.333	243.333	239.25	192.154	204.091	208.364	219.896	219.082	210.5	191.583	207.077	187.333	171.692	138.179	137.196	135.599
103.703	103.343	104.708	106.955	104.029	106.516	127.124	122.647	123.757	231.833	245.833	243.5	207.167	199.833	197.692	219.729	219.347	209.5	188.833	207.833	187	178.462	137.449	135.561	136.587
104.946	104.061	102.697	106.907	104.038	106.227	127.12	122.683	122.384	236.667	232.333	230.846	198.167	189.083	196.364	224.833	217.612	206.54	194.75	200.417	192.583	195.6	135.797	135.952	135.905
102.997	104.248	104.924	105.197	105.525	105.859	126.77	122.653	123.511	248.167	244.833	247.154	205.273	204.545	185.571	215.22	219.54	206.74	196.333	212.923	197.667	185.2	138.691	137.781	134.25
104.151	104.345	104.19	105.127	105.2	104.711	126.544	123.75	123.084	233.917	239.75	239.167	199.455	194.727	202.25	224.481	216.729	209.231	191.75	198.25	192.333	196.333	138.451	137.195	135.753
104.626	104.394	104.535	105.508	104.054	105.17	126.872	122.535	124.341	242.583	235.75	241	191.75	199.417	204.364	226.042	223.979	199.62	186.25	215.25	184.917	203.5	138.099	136.497	133.705
104.041	102.894	104.914	105.026	105.066	106.3	127.46	121.89	123.744	241.25	228.923	254.833	200.818	202.364	204.273	217.365	227.896	207.46	195.692	201.583	192.25	193.2	137.696	135.803	134.114
104.664	103.404	105.534	105.494	105.048	106.975	127.08	122.764	124.232	242.083	231.923	238	198.583	187.308	197.083	226.417	220.021	209.82	186.462	209.154	189.308	196.7	136.185	137.516	133.323
103.462	104.962	105.987	102.122	104.677	106.248	127.051	122.808	124.202	249.5	228.917	232.417	187.231	190.455	202	222.812	221.667	204.938	202.25	199.417	192.75	207.2	137.717	138.282	135.474
103.509	104.576	105.631	104.615	104.782	106.782	128.913	121.916	121.903	248	226.692	247.583	198.364	197.273	188.308	218	220.125	205.3	204.667	197.308	190.833	199	138.37	138.062	134.013
102.331	105.114	104.991	105.864	105.693	105.821	127.544	124.131	125.09	245.417	237.583	237.167	202.091	191.75	190.083	224.812	222.042	209.4	191.818	207.182	196.462	200.4	138.114	136.867	135.443
103.039	104.446	104.006	104.783	106.107	106.741	126.383	121.056	122.733	233.5	248.8	259.25	209.636	195.75	195.917	222.604	218.688	212.25	192.231	205.75	196.25	197.7	137.174	134.905	134.44
102.968	102.59	105.482	102.268	107.079	106.273	126.673	122.548	123.137	243.667	228.167	244.917	199.182	184.455	195.462	215.6	219.979	207.62	197.667	207	194.667	197	138.584	135.665	133.076
103.643	102.006	104.479	103.745	105.26	107.426	128.786	122.272	122.455	228.077	243.917	241.25	207.727	198.417	199.583	214.96	216.49	210.231	183.286	198.929	206.417	209	136.38	137.329	133.839
102.219	104.311	105.064	105.339	106.839	105.073	126.976	122.296	123.858	243.5	235.667	245	200.909	185.917	190.857	217.8	226.146	205.38	184.167	206.545	194.833	204.8	138.307	136.327	134.177
103.563	101.875	104.101	103.705	103.221	105.27	127.181	121.111	122.808	236.5	234.583	245.25	203.364	195.5	190.917	220.28	220.438	203.52	197.167	213	179.583	205.7	135.946	136.486	134.853
104.277	105.436	104.076	105.574	104.599	104.339	128.022	122.606	123.81	238.583	226.154	250.75	199.75	193.917	195.857	217.4	217.042	208.92	190.25	207.583	193.75	198.154	137.778	133.337	133.449
104.994	106.552	105.345	106.844	107.841	106.869	127.256	121.874	123.015	247.333	249.25	233.667	189.25	193.667	195.5	216.82	215.729	204.72	198.308	217.083	185.583	198.154	136.886	136.642	134.019
102.746	101.755	105.328	104.724	105.738	106.901	126.931	122.196	124.086	252.583	238.538	225.083	192.167	182.154	215	218.896	219.188	201.52	194.667	207.462	192.25	216.6	136.345	136.791	134.935
104.791	103.045	104.268	106.476	107.067	104.404	126.644	121.962	122.828	238.154	243.083	242.833	193.833	195.583	190.083	215.077	216.771	198.82	198.154	203.545	198.5	196.154	136.494	137.067	134.215
104.161	103.645	105.605	104.494	105.563	106.304	128.19	122.43	124.051	239.417	237.583	242.833	193.083	196.75	189.833	218.25	217.28	208.5	194	201.455	181.583	191.154	137.468	135.267	135.503
104.141	103.38	105.06	104.385	106.527	105.923	127.519	122.333	121.855	234	247.25	235.333	184.667	196	190.308	211.385	216.625	202.038	196.917	195.143	183.357	193.462	138.744	136.321	135.327
103.417	103.087	104.303	106.397	105.302	106.038	127.093	122.2	123.338	224	232.462	243.75	190.692	180.615	197.583	217.667	217.708	204.365	196.154	193	190.167	190.385	138.019	138.104	134.137
105.099	102.319	104.946	103.797	106.506	105.535	126.937	121.749	122.914	251.25	223.077	239.333	200	194.75	185	210.885	223.521	209.096	187.154	208.385	201.538	194.5	139.709	135.66	134.484
103.513	102.236	105.12	104.617	104.244	105.757	127.343	122.612	123.843	232.692	237.083	236.769	196.917	190.333	181.571	215.885	221.979	208.06	200.5	201.25	184.917	196	137.712	136.635	134.37
103.102	104.433	104.23	102.808	105.135	106.742	126.721	122.011	122.825	249.333	225.538	242.917	205.636	186.167	201.083	217.36	217.38	213.84	197.692	211.154	183.583	196.333	135.396	135.756	132.968
103.534	104.268	104.74	104.519	104.431	106.593	126.765	123.492	123.361	230.167	236.083	249.583	196.333	191.833	199	216.812	216.917	208.385	198	205.25	195	198.833	137.473	136.687	135.945
105.061	106.145	104.085	104.345	104.234	106.022	126.343	123.317	123.808	236.077	231.417	241.5	198.25	195.333	192.714	213.577	213.938	208.98	195.273	213.917	176.714	195.833	138.962	138.244	134.568
102.358	104.196	105.426	104.436	104.547	106.367	128.088	122.774	123.412	232.583	233.667	247.5	205.167	188.273	201.077	217.5	220.5	210.46	196.5	207.083	200.417	199.083	138.946	137.956	134.117
103.211	102.723	103.835	105.138	106.798	106.18	126.038	123.155	123.885	240.417	227	238.25	195.667	204	193.167	213.308	217.7	205.78	200.308	210.333	193	208.333	138.108	137.244	135.794
104.949	101.939	104.93	105.106	103.578	106.361	126.659	123.741	122.852	230.154	221.077	234.167	194.455	194	193.917	220.167	221.917	206.942	198.077	202.917	202.538	202.583	136.668	137.248	134.741
104.073	102	104.449	104.893	106.49	105.713	126.342	121.31	122.993	241.083	231.583	249.917	194	181.692	206.333	212.654	219.54	207.32	206.929	199.583	187.5	197.083	138.587	134.851	135.227
102.048	103.727	104.591	106.579	106.316	106.39	126.89	122.627	121.124	223.583	241.833	243.833	197	192.846	203.455	220.469	220.854	205.788	197.273	209.333	188.615	196.167	137.731	136.806	134.57
102.994	102.486	105.968	105.332	105.25	104.112	128.022	123.403	122.197	241.167	222.917	260.167	199.545	202.091	198.923	219.375	217.292	210.979	193.154	213.417	202.308	193.5	137.477	137.424	133.905
103.864	104.713	105.876	105.429	105.873	104.863	125.211	123.638	122.985	243.417	228.385	236.333	211.818	181	195.091	212.865	218.271	208.058	200.692	223.5	189.25	202.5	139.441	136.422	133.915
102.543	102.885	104.174	105.405	106.016	105.981	126.193	124.643	123.026	241.25	240.417	239.25	187.083	195.583	195.091	221.771	213.88	208.16	195.083	219.273	192.5	193.357	137.559	135.704	135.437
103.741	103.206	104.738	105.968	105.613	107.189	126.227	124.385	123.763	238.167	237.5	246.083	195.5	181.231	205.273	215.154	220.76	208.192	187.667	206.308	200.833	188.833	136.951	136.237	134.532
101.811	103.777	106.827	107.974	105.772	106.214	128.243	123.603	122.408	235.75	237.25	247.917	178.786	190.385	191.182	224.24	218.82	205.346	196.818	210.692	191.923	200	137.528	136.915	134.225
103.972	102.686	105.58	104.862	103.731	105.272	126.671	123.443	122.361	229.417	241.083	227.75	194.417	183.846	195.909	221.167	218.729	196.731	176.643	211.615	199.308	222.9	136.99	136.385	134.633
102.312	104.541	103.215	107.115	105.212	105.516	124.441	124.29	122.535	242.583	218.077	240.75	179.923	180.077	198.455	222.75	214.92	207.083	200.923	205.769	190.417	221.8	137.14	137.677	134.918
102.543	103.335	103.763	105.725	104.862	108.474	127.075	124.33	122.969	235.917	237.769	245.417	190	190.917	196.727	214.271	217.938	202.827	198.417	205.167	198.333	187.857	138.272	138.171	135.797
102.297	103.522	104.613	104.291	105.902	105.968	127.385	122.482	123.515	226	239.417	240.833	206.091	175.846	204	223.479	219.625	199.538	204.182	209.667	178.714	207.7	136.193	137.717	135.883
104.573	103.939	103.545	104.794	106.348	106.359	126.769	122.326	121.833	240.917	242.5	238.538	211.182	194.182	197	213.096	219.02	202.635	200.818	223.417	195.333	200.75	136.822	135.083	136.013
101.674	101.856	104.271	104.513	104.381	106.635	126.662	123.098	122.723	249.75	234.154	229.538	202.5	193.364	189	216.878	222.167	196.981	191.308	209.462	188	195.5	136.633	136.283	135.434
101.956	103.81	105.449	103.737	104.351	106.42	126.64	124.648	123.245	246.083	252.8	235.5	206.273	199.091	201.909	204.885	219.76	206.269	196	211.25	189.25	199.25	136.948	137.283	135.661
104.313	103.353	103.527	105.856	105.397	106.383	125.776	122.316	123.233	250.75	233.833	235.5	211.545	196.636	178.692	210.812	217.125	204.269	200.2	204.214	191.182	190.308	137.365	136.575	137.119
102.19	103.047	104.527	103.968	104.763	105.907	127.086	122.33	123.64	248.25	246.417	238.615	201.077	202.273	203.727	218.184	211.688	197.365	203	211.538	191.462	193.692	135.519	135.639	134.826
102.294	103.994	105.203	104.718	104.975	106.168	126.15	124.22	124.454	244.583	246.6	226.462	202	192	201.455	219.88	217.5	209.538	197.538	206.154	201.273	207.833	136.305	136.385	135.519
103.658	102.593	104.687	104.208	106.113	107.92	126.042	122.753	124.753	243.333	238.9	232.308	202.75	184.583	185.923	219.083	220.688	199.942	203.7	212.846	195.75	198.3	137.759	135.606	134.649
104.511	103.176	104.829	105.486	102.847	105.696	127.095	122.366	124.15	241.833	230.846	232.417	188.385	191.75	198.818	217.167	218.396	197.942	214.364	213.667	197.917	185.308	136.854	139.326	135.962
104.117	103.792	105.366	104.804	104.215	106.965	125.676	123.409	122.996	250.167	227	235.308	189.077	190.182	194.727	212.808	215.68	203.192	185.769	231.154	189.5	187.846	138.448	137.654	136.111
103.316	101.975	104.17	104.74	105.193	106.759	126.279	122.608	124.111	239	243	252.9	196.417	186.273	205.273	220.917	213.896	199.769	195	198.833	200	186	138.386	136.908	137.326
102.56	104.387	102.962	107.425	105.424	106.185	126.73	123.095	123.082	238.25	230.833	257.1	205.5	197.667	192.583	210.14	218.042	203.038	202.929	204.833	191.462	203.667	137.025	137.149	136.212
102.82	101.84	105.307	104.061	105.984	106.486	126.729	124.033	122.689	229.846	256.1	252.5	205.909	188.385	189.538	207.692	215.938	199.577	209.583	217.667	198.167	187.5	138.668	137.832	133.81
103.013	102.423	104.514	105.649	105.748	105.612	126.193	123.763	123.244	236.667	259.2	232.167	198.583	187	199.667	218.694	215.667	197.538	205.308	209.25	196.083	196.333	137.798	137.968	134.19
102.978	102.698	104.345	104.773	105.915	105.263	126.463	122.858	122.126	232.25	228.154	245.417	184.545	193.417	185.083	216.204	216.146	196.673	209.273	214.727	185.286	190.154	138.492	137.711	133.734
103.317	104.462	103.719	103.883	105.934	105.223	126.794	123.322	122.482	240.417	244.167	239.692	192.154	190.231	195.667	218.667	221.449	200.365	203.385	207.182	186.538	180.857	137.073	139.789	135.237
103.38	104.638	103.877	106.462	105.256	108.383	126.501	123.047	122.617	232.333	223.5	248.083	193.25	196	187.231	217.388	216.633	205.019	200.273	205.5	188.286	175.692	137.082	137.27	135.022
103.12	103.817	105.756	105.423	102.92	105.837	127.022	123.317	124.512	239.917	220.727	231.462	204.182	182.786	194	217.021	225.878	197.981	194.231	206.833	211.3	197.308	136.404	137.263	134.715
101.943	104.035	104.906	105.958	105.873	106.626	125.446	124.381	122.322	236	239.182	224.692	200.182	186.818	198.273	208.86	224.52	200.577	187.545	216.833	196.636	196.25	138.035	137.253	132.82
104.756	102.868	103.831	104.883	104.426	105.377	126.836	124.526	122.909	231.417	239.091	229.615	193.818	197.727	188.231	214.86	215.714	200.269	194.462	229.364	202.636	176.615	138.87	136.389	136.589
104.117	102.497	103.541	106.041	105.639	105.312	126.819	121.805	122.199	239	222.615	243.083	202	196.417	192.545	220.68	215.854	201.865	207.545	217.417	201.077	188.154	139.854	136.016	135.402
103.579	104.119	104.117	105.612	105.965	104.687	126.435	122.291	122.091	235.25	223.818	233.154	192.083	177	189.923	219.354	221.102	199.827	199.769	200.5	193.5	185.583	138.147	137.552	135.221
103.206	103.306	104.363	105.633	104.753	106.841	127.588	123.126	123.086	240.5	218.615	235.667	193.167	189.75	193.917	221.2	216.667	203.346	200.083	215	192.75	206.417	137.314	137.619	135.155
102.446	102.113	104.351	103.808	106.174	105.343	126.85	123.337	124.295	231.25	225.385	229.833	190.182	198.231	183.462	217.408	226.521	206.135	193.583	216.917	190	190.167	135.32	137.971	134.823
103.714	102.518	104.044	103.981	105.146	105.208	126.286	122.894	123.116	236.583	231.545	235.75	198.273	192.083	196.083	215.5	216.375	205.44	198.636	205.308	173.714	181.75	136.593	136.791	135.278
104.915	104.615	102.544	104.706	105.709	105.904	124.962	120.906	122.63	239.667	235.727	238.583	201	176.182	199	213.34	229.854	201.269	206.833	206.231	191.75	188.833	139.121	135.362	134.405
102.175	101.486	104.335	104.269	104.16	105.063	125.314	123.352	122.126	240.333	219.917	247.25	191.917	188.818	188.833	202.92	221.51	201.385	197.769	206.077	190.615	187.333	138.981	136.835	134.528
103.886	101.753	102.577	105.077	105.581	105.217	124.632	122.744	122.082	232.25	235.818	222.231	197.143	187.583	193.077	222.28	222.312	200.731	187.923	217.308	194.417	185.083	138.527	136.47	135.12
102.301	103.869	102.599	104.678	104.217	106.669	127.029	122.592	122.367	234.077	214.154	229.25	189.333	208.273	183.308	220.28	216.102	204.904	194	208.917	189.5	167.714	139.097	135.825	134.646
102.744	103.051	104.326	104.817	103.649	105.323	126.794	123.36	121.403	232.692	219.077	238.538	201.182	197.154	183.786	212.54	228.312	205.54	198.846	216.5	198.615	190.333	136.781	138.06	134.386
102.719	101.843	104.057	105.564	104.095	107.481	126.299	122.624	122.876	235.167	228.077	239.385	195.462	192.583	200.333	221.062	225.479	207.58	188.538	214.5	192.077	207.25	138.799	138.441	134.38
103.038	103.131	104.312	106.155	105.883	105.157	126.079	125.032	122.817	236.583	227.636	238.667	189.769	189.538	204.091	222.979	224.204	200.212	198.333	217.75	189.846	193.231	138.683	136.721	135.013
103.804	104.213	105.103	105.07	106.705	106.991	127.692	122.611	122.872	235.308	218.846	241.417	204.917	200.727	193.846	214.796	217.041	201.154	201	215.462	195.417	218.7	135.974	137.93	134.146
103.835	101.936	105.066	104.31	105.273	107.252	126.894	122.317	121.716	227.231	231.385	239.25	200.583	191.417	197.364	221.878	218.896	201.596	193.167	210.917	195.5	183	137.269	136.956	135.313
102.506	103.295	106.029	104.863	106.179	107.316	125.313	123.34	123.645	235.615	224.833	241.462	193.091	198.5	189.583	223.438	222.646	200.077	189.75	208.583	192.091	203.1	137.59	136.756	134.035
102.401	101.324	103.326	106.068	105.62	106.933	128.196	122.422	122.369	238.333	241.75	237.833	179.692	202.692	197.917	216.96	219.625	206.24	197.833	226.667	200.417	201.417	137.41	138.311	135.44
101.937	102.758	104.634	104.464	105.252	105.218	127.033	122.71	122.6	237.167	227.417	245.7	204	189.385	200.818	221.28	222.792	211.06	182.071	223.231	190.667	180.286	136.782	137.568	134.943
103.205	103.064	103.319	104.506	103.09	106.713	125.838	123.389	122.643	225.083	233.917	258.1	194.417	201.154	229.9	219.5	217.735	206	192.667	212.833	195.167	183.714	138.847	135.537	135.114
104.196	103.281	104.262	104.61	106.248	105.981	127.726	121.411	122.104	222.538	225.462	221.462	176.667	185	195.455	218.3	223.122	206.78	186.929	218.615	182.75	220.9	137.445	136.816	134.775
101.693	103.272	103.709	103.558	105.466	104.681	127.303	122.558	123.038	230.462	221.692	241.385	192.167	194.167	196.667	216.62	216.571	204.32	189.083	214.833	187.333	207	138.136	136.41	134.505
103.476	103.337	104.981	104.302	106.049	106.666	129.109	122.504	122.772	230.75	226.5	226.615	192.667	185.846	203.4	218.167	221.917	207.38	188.769	204.462	196.5	182.857	138.415	137.606	133.873
104.696	102.927	104.285	104.62	104.199	105.529	125.77	123.408	122.967	230	235.5	249.6	190.462	190.615	200.75	223.82	223.84	196.92	200.5	225.615	205.25	197.786	138.616	136.399	134.513
103.822	102.564	105.653	104.124	105.206	105.438	126.721	123.23	121.288	233.917	222.667	256.6	197.917	196.545	196.273	220.625	218.021	203.146	201.333	223.583	185.083	183.643	138.753	136.857	135.883
101.465	104.521	103.681	106.12	105.575	106.826	126.941	122.159	123.845	227.417	225.333	252.7	187.462	191.583	198.455	218.92	225.896	210.02	185.5	217.833	191.333	195.583	136.348	137.559	133.956
103.232	102.845	104.259	105.529	104.763	105.413	128.755	123.907	122.252	225.615	220.727	247.1	197.583	191.692	197.083	225.208	219.9	209.571	207.769	223.333	196.333	192.071	138.321	138.098	135.013
103.213	101.571	103.824	104.597	105.782	103.87	126.851	122.834	122.262	229.154	221.231	230.923	187.917	197.455	207.273	216.18	219.667	210.7	202.727	219.923	186.154	213.6	139.234	138.27	134.712
102.723	103.732	103.511	105.348	106.201	105.978	128.111	121.471	123.097	231	230.462	237.75	194.636	192.636	197.25	218.96	219.5	209.571	196.538	207.692	191.846	191.333	139.157	136.711	134.725
103.089	103.159	104.43	103.556	106.915	105.569	127.942	122.969	122.402	234.25	222.182	233.417	200.083	194.273	191.667	217.188	220.479	213.271	193.25	217.538	200.583	214.769	137.477	138.651	135.101
103.098	103.446	103.517	105.279	105.025	105.229	127.936	120.353	123.135	222.417	226.833	234.667	189.846	186.25	190	221.271	217.6	213.708	193.25	214.636	198.727	222.2	138.178	137.137	135.215
103.013	103.167	104.016	104.509	105.484	104.427	129.812	122.145	122.329	224.077	233.667	246.4	194	190.833	193.5	220.583	222.188	211.604	183.308	214	184.846	208.75	135.492	136.495	135.873
103.114	102.971	103.767	105.652	104.965	104.895	127.191	123.499	123.029	234.583	220	243.833	199.167	196.364	196.75	216.731	214.94	205.51	199.231	217.846	200.583	183.214	139.129	137.705	133.883
101.203	102.92	104.702	103.833	105.955	105.817	128.057	123.131	122.321	228.154	224	231.417	189.25	194.5	192.5	221.646	217.82	216.062	192.923	212.917	200.333	202.5	137.539	137.175	133.123
103.739	103.553	105.868	104.671	105.285	103.965	125.873	122.33	122.832	237.25	228.154	228.5	185.308	202.273	208.917	219.646	222.5	203.44	212.333	229.917	190.154	187.643	136.933	136.87	135.083
103.218	105.137	103.135	105.147	105.577	104.673	129.659	121.136	123.223	239.917	231.455	248.4	190.667	177.385	185.385	224.1	215.58	211.021	194.333	225.923	186.583	195.385	139.292	137.975	135.174
103.946	104.022	104.382	105.789	106.421	105.879	126.274	122.08	122.978	231.5	214.692	232	184.25	187.364	199.667	212.542	224.2	212.104	199	222.923	197.5	176.571	139.758	138.235	134.408
104.665	104.038	104.9	104.198	104.123	106.532	128.847	121.28	121.558	234.75	236.909	227.769	184.462	182.909	190.417	219.125	216.12	205.64	194.846	219.385	192.25	215.6	136.443	137.86	132.589
102.146	102.813	106.076	104.695	104.554	105.651	128.923	122.082	122.982	232.333	224.692	233	183.077	184	199.545	219.542	218.28	206.104	207.727	206.667	205.083	226.6	138.167	137.695	133.946
104.073	104.968	104.273	103.965	105.828	105.221	126.855	122.595	122.229	234.333	222.273	228.923	200.077	180.417	200.167	218.34	216.18	214.167	204.091	234.583	182.462	202.8	138.905	139.591	133.152
102.544	103.684	105.554	104.785	104.453	105.849	127.247	123.426	122.563	248.167	221.615	230.462	197.182	191.917	197.615	217.12	218.74	201.2	200.077	229.583	191.083	185.786	138.546	137.498	133.212
103.502	104.38	105.321	103.289	104.854	105.312	127.998	122.918	121.509	239.333	221.077	240.333	185	197.818	202.077	220	223.84	212.604	198.333	208.25	206.182	199.385	141.234	138.279	135.016
103.472	103.921	105.502	104.94	104.494	104.968	126.658	121.541	122.993	234.167	212	232.917	213	192.25	188.167	223.458	222.792	203.667	204.3	227.75	195.385	182.786	137.806	138.454	135.335
104.329	104.231	105.862	104.286	105.673	106.449	127.31	122.155	122.146	242.583	222.583	230.417	196.25	194.455	205.182	215.44	222.667	214.396	203	215.333	199.273	187.846	137.723	137.711	134.636
102.889	102.927	104.388	104.447	105.716	105.846	127.667	122.801	121.998	249.583	219.077	221.846	210.545	196.769	204.846	219.32	220.34	208.25	201.231	214.385	196.636	204.6	138.25	136.987	134.237
104.016	105.786	103.952	103.881	103.877	105.489	128.894	121.823	121.799	243.833	219.417	227.417	195.667	192.818	191.308	218.06	226.36	212.125	203.636	216.167	192.417	202.923	135.789	137.481	134.687
104.638	105.137	104.46	105.177	105.456	105.628	127.245	120.978	121.758	249.083	218.583	231.538	197.167	190.538	192.583	216.75	220.62	207.354	210.833	216	193.417	185.071	139.104	137.272	132.353
103.807	102.706	104.05	104.035	106.746	105.907	127.63	120.825	122.796	233.077	221.273	237.462	198.545	188.25	201.917	216.917	218.46	203.48	198.538	195.154	201.154	202.308	139.454	137.827	133.128
104.671	102.316	105.479	106.105	105.587	104.621	127.345	122.42	122.198	246.917	213.231	247.583	204.083	184.583	197.5	224.18	216.86	210.833	200.75	219.25	202.364	195.231	137.671	137.122	133.396
103.728	102.377	103.59	105.811	105.703	107.042	127.883	121.458	121.292	245.75	215.417	245.818	195	186.167	196.167	218.94	217.94	207.68	194.667	202.923	194.25	203.2	138.389	137.61	134.863
103.461	101.939	103.18	105.558	105.032	104.858	128.207	122.603	121.919	244.583	217.5	265.5	204.091	188.75	207.091	217.854	218.44	215.042	197.455	210.333	202.385	205.077	139.123	137.968	135.5
105.006	102.738	104.236	104.269	105.626	107.097	127.311	121.92	121.038	246.167	245.6	224.083	200.818	179.917	202.455	218.58	219.521	208.646	197.1	216.231	198.667	190	138.661	138.09	134.487
104.648	102.884	104.312	103.161	106.242	105.11	126.099	120.718	120.097	235.833	221.417	265.5	201.455	187.538	202.273	223.958	224.8	203.562	201	204.923	205.923	203.6	139.617	135.895	134.26
105.041	103.357	103.639	105.776	108.087	104.562	127.241	121.448	122.39	244	223.833	235.615	195.083	187.333	191.5	220.875	215.38	208.562	185.769	205.5	193.818	198.7	136.851	135.517	134.202
103.508	102.357	105.212	105.397	106.156	107.271	127.126	120.85	121.634	235.692	228.154	225.692	205.923	191.917	205.818	217.021	214.98	199.44	197.333	219.692	198.091	191.538	137.965	137.08	134.468
102.943	101.302	104.962	104.228	105.422	107.799	127.485	121.148	121.009	243.833	218.923	243.818	189.615	187.5	189.636	219.24	231.146	204.25	201.417	210.308	201.917	212	139.374	138.394	133.114
102.695	102.656	106.023	106.278	104.873	106.094	127.636	122.723	122.066	228.846	209.333	252.455	178.615	183.833	188.083	220.375	214.22	204.979	208.833	216.083	195.273	195.385	139.981	136.348	134.81
102.193	103.77	104.331	103.333	106.391	105.312	126.348	122.015	121.892	238.5	228.417	250.4	195.833	191.167	190.167	219.521	217.5	202.923	226.3	211.154	206.455	211.3	139.455	137.879	134.668
105.022	100.255	105.836	101.933	106.294	106.893	128.288	121.864	122.759	236.75	226.5	240	201.909	183.417	200.636	216.688	222.542	214.776	202.818	206.077	199.455	202.462	138.492	136.134	134.953
103.869	103.031	103.563	104.116	107.232	106.234	127.387	122.634	122.223	247.833	230.833	254.7	194.273	192.167	197.545	218.792	217.75	204.625	208.455	226.5	185.583	207.2	137.272	137.773	133.76
103.237	103.648	104.252	104.78	104.704	106.906	128.035	121.843	122.475	251	211.75	234.308	198.091	186.417	193	215.26	214.78	206.755	189.538	219.692	206.182	170.714	137.816	136.984	131.891
103.88	105.508	105.738	103.889	103.783	106.362	125.722	120.965	122.217	248.083	221.833	238.462	196.182	190.385	205.333	218.312	221.375	209.312	185.429	214	197	195.077	138.612	138.409	132.095
103.845	103.283	105.726	105.486	104.677	106.498	127.111	120.795	122.256	250.25	228.333	243.917	197.091	191.385	193.167	218.479	225.042	206.061	196.727	214.385	199	201.8	139.576	137.486	132.279
104.775	102.375	103.102	105.114	106.595	104.495	126.859	120.69	121.382	251.25	221.583	244	190.231	188.583	186.5	216.673	218.729	208.12	205.636	231.846	205.545	187.75	139.238	137.381	133.821
104.337	102.219	104.994	104.184	105.962	105.308	127.069	120.971	124.201	247.917	222.583	242.833	193.727	183.25	186.154	221.938	215.48	204.061	205.455	204.846	201.167	185.667	137.956	135.575	134.328
104.443	102.216	105.293	102.446	105.093	105.407	129.161	122.196	122.195	245.083	223.583	228.083	189	185.917	201	219.75	211.88	208.72	196.615	213.417	201.25	194.417	139.38	138.762	133.142
103.111	101.968	104.208	103.415	105.616	105.577	125.088	122.204	121.728	262.833	227.917	237.167	195.462	187.333	181.5	228.375	213	212.92	194.615	225.154	209.818	190.583	139.858	136.35	132.517
103.851	102.825	104.233	105.064	105.259	104.837	125.881	121.965	122.989	257.833	223.917	235.25	182.5	186.462	191.167	227.667	204.84	206.84	202.727	220.538	202.75	190.917	138.209	137.513	132.961
105.047	102.829	103.073	104.823	106.488	104.911	127.23	121.618	123.088	240.923	217.917	227	197.25	187.154	198.25	218.347	218.776	207.02	203.583	229.182	203.692	180.538	138.399	137.984	133.285
103.15	103.314	104.205	103.78	105.839	106.228	126.513	122.572	122.642	242.385	219.5	231.538	203.818	182	188.917	222.521	213.286	203.25	196.692	207.429	219.273	178.615	137.93	137.54	132.608
104.167	103.575	104.434	105.747	106.016	105.994	128.325	119.431	122.336	242.75	204.417	246.3	196.917	186	179.769	218.417	210.6	204.58	195.538	213.75	204.636	185.75	138.403	137.208	133.758
106.038	105.819	105.07	105.142	105.016	105.322	127.589	121.403	121.852	258.917	213.846	231.308	189.615	196.333	181.5	224.479	219.306	203.442	193.143	215.333	193	194	138.278	136.31	133.619
102.342	103.232	105.34	104.537	104.456	104.868	126.731	123.316	124.084	244.833	213.308	227.846	191.667	194.667	192.167	223.583	222.08	205.615	201	204.417	201.8	197	136.703	136.815	134.221
104.689	101.863	105.772	104.937	105.383	104.703	127.426	123.064	121.584	236.385	217.667	229.917	202.1	179.083	186.417	214.167	215.918	203.077	214.6	224.455	204.636	190.2	137.715	135.861	132.708
103.421	103.267	104.82	104.166	105.612	104.936	127.717	123.627	121.872	243.75	226.583	221.333	197.25	193.667	179.615	225.771	215.25	205.54	195	203.615	210.417	184.667	137.411	136.07	131.503
102.651	102.543	104.099	104	104.555	105.636	128.387	122.403	122.83	233.583	215.846	229.286	199.818	188.385	190.833	215	211.58	204.096	205.154	216.273	198.5	190.6	137.07	136.689	132.367
103.332	102.822	103.997	102.962	104.589	105.448	128.277	121.588	121.659	240.417	218.846	235.333	208.273	186.231	177.923	218.25	205.08	204.75	212	214.583	197.417	207	137.582	137.514	134.297
103.437	103.959	103.331	103.391	105.596	105.724	128.315	121.717	123.874	248.167	227.75	221.769	191.636	178	195.1	223.18	222.5	203.962	208.273	239.8	192	191.769	137.971	138.251	133.478
103.646	104.473	104.269	103.282	105.571	104.276	128.767	122.931	122.36	235.231	216	233.083	190.077	181.462	195.364	217.62	215.98	200.288	203.909	225.273	210	188.25	138.494	136.949	131.975
104.752	104.349	104.388	104.446	105.472	105.474	127.215	120.375	122.916	233.083	235.4	231.714	197	186.833	196.083	221.38	214.32	213.229	205.923	220	201.5	204.3	138.597	137.959	132.73
104.199	103.727	103.785	103.171	106.154	105.896	127.293	121.131	122.636	242.583	247	225.833	197.083	175.333	197.917	217.333	209.64	207.833	204.083	207.077	187	189	139.665	134.917	133.715
103.006	102.549	104.136	105.178	106.171	107.547	128.426	121.004	121.951	231.923	221.333	217	199.909	182.154	193.833	215.271	219.635	203	195.5	227.6	205.727	192.333	138.658	139.324	132.804
103.965	103.413	104.808	104.267	106.136	106.156	127.37	122.894	122.376	240.333	230.333	218.571	190.583	190.083	200	220.688	215.167	201.735	191	224.2	199	197.231	139.81	137.022	133.43
103.625	103.7	103.303	104.298	106.079	105.672	127.238	121.923	122.064	227.333	222	243.417	190.071	185.583	197.545	226.292	215.979	199.94	189.818	199.25	178.857	187.462	136.667	136.737	133.883
104.099	103.137	105.361	104.808	106.013	104.832	127.374	121.743	120.947	223.833	212.75	234.5	187.462	187.5	204.818	228.208	218.306	204.44	190.636	228.273	199.636	178	138.095	136.236	132.606
104.571	103.403	104.058	105.583	104.444	107.18	125.606	122.956	123.931	245.417	221.083	226.583	193.167	187.833	186.692	223.542	220.2	206.396	188.8	209.077	207.083	193.077	138.067	136.816	134.355
103.193	102.419	103.749	104.016	105.918	104.712	127.579	121.062	123.385	235.333	245.5	226.083	200.364	190.5	188.182	229.229	219.042	203.667	193	204.692	203.667	185.308	138.127	136.358	134.864
102.994	103.542	103.839	105.456	105.165	105.39	127.389	122.088	122.306	246.083	215.615	242.167	201.727	192.25	188	220.878	220.755	211.788	198.385	224.364	192.909	186.769	139.123	137.616	134.421
103.527	103.74	104.975	102.815	105.301	104.679	125.128	120.893	120.544	238.083	218.538	231.083	196.364	186.308	207.667	221.08	214.54	211.885	199.818	216.833	189.538	188.154	139.427	137.832	133.959
102.443	103.026	103.415	105.374	105.799	105.952	128.577	122.637	121.497	221.5	209.692	240.083	189.583	194.333	193.583	222.354	220.592	214	192.167	235.9	189.083	180.75	139.688	137.511	133.658
101.832	103.747	102.927	103.654	105.921	105.298	126.402	122.706	123.281	242.417	222.769	223	190.5	184.667	197.091	218.25	212.22	207.875	202.25	232	198.615	192.846	137.642	136.603	133.87
104.085	102.24	104.503	103.471	106.702	106.558	127.741	120.872	121.166	225.833	222.091	226.692	187.417	192.333	196.231	216.396	218.125	211.438	185.214	228.769	198.833	191.75	139.202	136.943	134.127
104.215	103.074	104.64	104.994	104.877	105.374	126.577	120.78	121.747	231.417	230.455	243.8	194.167	191	193.667	216.796	210.88	207.34	205.417	223.667	201.273	191.692	137.889	137.231	133.623
103.266	103.346	105.472	105.247	105.646	105.959	125.699	120.957	122.361	232.917	215.615	236.417	198.091	182	191.667	224.708	220.184	208.5	204.846	221.692	198.333	181.583	138.795	136.797	134.937
103.732	102.157	105.527	103.633	104.522	106.826	127.345	123.445	123.578	245.769	216.923	238.833	182.615	188.333	189.167	211.979	208.74	203.731	183.143	233.1	196.091	188.333	139.451	135.563	134.335
102.772	101.734	104.303	105.376	104.446	104.546	126.991	120.715	122.963	227.615	221.333	232.769	201.1	188	189.154	213.917	214.28	205.481	189.846	231.077	184.583	200.538	138.39	137.089	133.623
102.88	102.881	104.247	104.902	104.368	105.363	126.772	121.082	123.392	233.538	226.167	230.615	196.917	192.083	203.182	221.854	213.5	206.4	185	209	195.583	196.667	139.123	138.269	135.519
104.192	103.795	104.088	103.107	106.089	106.732	126.69	120.194	122.475	224.769	221.154	232.917	196.5	180.583	200	221.938	212.898	210.42	193.6	233.6	204.455	199.9	137.699	136.772	133.329
104.038	101.603	104.217	103.924	105.488	106.108	128.643	120.015	122.198	225.538	218	226	192.182	187.417	198.417	210	214.184	209.48	188.923	221.308	202.273	196.846	138.142	137.199	134.212
104.617	103.495	102.801	105.13	105.81	105.403	126.893	121.347	120.773	230.385	223.167	219.667	195.455	186.75	179.917	211.878	215.367	206.846	186.667	227.615	184.583	200	135.955	138.415	133.782
104.268	101.975	102.94	105.926	105.482	106.669	128.517	120.419	123.086	247.5	219.273	235.25	192.75	193.5	195.417	212.62	220.653	207.38	190.091	221.769	199.083	185.214	138.475	136.965	135.737
103.718	103.314	105.117	106.481	105.126	106.226	126.285	119.89	123.77	243.667	215.833	239.923	198.25	186.417	179.5	219.688	210.02	203.135	201.917	220.692	197.583	187.667	137.668	138.708	135.263
101.706	103.025	104.366	104.237	105.136	106.692	127.611	122.187	120.954	238	218.583	223.333	208.083	188.583	191.833	219.604	214.667	207.14	189.25	243.2	188.769	195.917	136.949	137.674	134.816
103.981	102.524	104.756	105.384	104.802	106.095	127.27	122.321	121.425	227.231	215.364	236.615	192.333	183.25	186.545	221.729	216.479	202.462	205.909	210.462	182.4	204.643	137.546	137.566	134.456
102.475	101.765	103.653	105.75	104.667	103.76	127.267	120.675	122.889	245.615	214.923	238.583	202.333	198.083	185.833	214.245	218.521	207.25	198.917	233.4	197.833	210	139.025	138.837	134.548
103.623	102.14	104.41	103.663	104.984	104.234	128.063	121.309	121.622	232.462	210	240.5	194.75	195.75	191.182	220.833	218.245	200.231	196.727	222.231	201.417	211.4	138.503	138.699	133.237
103.538	103.216	104.519	104.826	104.543	107.209	127.44	121.159	122.201	250.667	209.833	240	194.091	180.846	181	220.833	225.388	203.269	202.636	205.615	197	208.4	137.756	137.522	133.077
101.668	102.194	104.783	105.526	105.741	106.228	127.708	122.489	121.289	227.5	215.308	238.692	213.364	188.846	188.75	216.021	218.776	209	200.455	233.25	191.25	204.3	137.679	138.965	135.41
104.148	102.537	106.117	103.984	105.528	106.137	127.177	121.779	120.541	246.615	216.538	244.583	190.833	192.083	184.923	219.812	223.878	204.519	210.273	223.615	208.545	211	136.244	139.123	135.426
103.215	103.685	104.991	105.451	105.74	105.334	127.296	121.042	121.488	238.846	213.333	223.071	175.583	184.333	189.154	212.449	223.143	204.615	219.385	219.154	199.545	212.1	137.509	139.603	137.074
102.313	103.686	104.737	104.997	104.344	106.167	126.482	121.172	121.887	254.083	208.583	235	189.154	192.692	198.727	220.708	207.3	207.942	206.083	213.615	213.727	196.5	138.025	137.266	135.323
103.538	101.206	103.293	104.153	105.247	105.358	127.638	122.342	120.894	234.333	243.6	238.417	191.5	184.385	195.917	222.792	211.34	202.808	231.8	211.846	190.182	195.3	137.513	137.807	134.101
102.832	102.584	104.107	105.234	105.631	105.678	126.736	122.379	120.716	249.833	223	229.917	201.167	187	196.75	212.245	226.92	204.212	204.615	243.9	188.333	210.4	138.133	137.822	136.75
103.943	101.792	102.912	105.798	105.079	104.388	126.459	120.843	120.661	225.167	205.75	243.917	196.538	185.833	183.182	214.857	228.64	201.5	208.167	234.4	189.333	196.4	136.057	138.225	134.652
104.573	103.691	103.78	105.328	106.201	108.404	127.659	120.956	121.406	231.231	218.75	233.667	198	174.333	186.615	218.74	216.44	202.442	199.929	224.5	199.833	193.7	136.93	138.044	133.766
102.994	102.131	104.854	104.462	104.835	105.823	128.405	121.945	121.524	213.917	219.462	229.5	192.5	170.25	185.077	221.333	214.26	204.135	202.615	222	205.917	200	137.282	136.959	133.779
103.818	102.332	103.158	105.119	104.682	106.01	125.913	121.219	119.976	241	213.615	237.583	192.333	178	187.833	214.837	215.4	211.596	215.455	232.615	193.692	197.6	136.219	138.968	132.833
102.335	102.667	105.772	104.443	104.92	106.047	126.48	122.485	122.067	237.077	219.333	240.25	187.167	195.75	201.182	222.625	226.667	211.25	196.167	236.1	190.083	206	137.575	138.505	134.763
102.152	103.093	105.006	104.965	106.369	107.933	127.78	122.854	121.971	235.692	217.917	230.667	175.429	169.692	201.917	219.184	220.52	200.635	197.5	224.167	186.636	192.6	137.759	138.212	136.054
103.68	101.824	103.612	104.788	103.364	106.76	127.925	122.581	121.149	228.385	218.308	234.25	191.909	198.455	187.917	216.312	220.918	197.385	194.231	225.308	200.417	203.1	137.918	137.848	134.801
102.849	103.505	103.77	104.386	104.367	105.942	126.314	121.795	121.474	235.75	217.333	228.583	204.273	198.091	194.182	213.688	223.5	205.942	193.077	224.571	183.692	189.5	138.8	138.174	135.193
104.121	102.188	104.107	106.771	106.678	106.356	127.409	121.473	121.285	246.333	222.833	237	188.917	186.909	184.846	215.5	219.896	204.173	205.462	224	197.818	205	137.715	136.94	132.962
104.525	102.888	103.116	104.085	105.835	105.818	126.186	121.81	123.417	241.25	222.583	237.75	186	181.385	195.692	207.896	218.4	200.058	199.231	240.5	197.917	197.214	138.244	139.549	134.433
104.459	102.866	103.902	105.731	105.595	103.67	126.796	122.06	121.954	240.333	222	236.917	195.818	199	189.615	226.396	223.898	200.385	206.333	217.923	197.727	204.8	138.304	139.768	134.88
103.506	103.288	102.073	104.688	105.381	106.562	126.647	121.436	123.46	220.462	218.308	240.667	189	197.917	184.846	221.167	221.167	197.385	207.333	239.8	192.364	202.9	137.997	139.852	132.37
104.886	104.115	104.233	106.287	104.937	104.836	127.122	122.283	122.43	228.923	227.583	223.429	193.667	191.462	188.083	218.896	215.74	200.038	218.333	220.182	200.308	202.2	139.146	138.722	134.426
102.975	102.882	104.338	104.222	103.71	105.669	126.27	121.113	120.075	236	204.333	230.846	196.8	200.583	186.308	211.604	224.36	197.827	209.833	226.3	194.385	205.5	137.545	137.994	132.753
103.652	103.415	104.189	105	105.187	104.99	127.295	121.235	123.109	240.615	215.077	247.417	188.154	193.091	193.083	216.735	218.184	204.269	198.917	214.583	191.917	203.4	138.6	135.93	136.123
102.709	102.486	103.221	103.757	105.744	107.24	128.362	121.334	121.874	237.917	226.583	241.833	198.417	188.333	193.364	213.583	224.837	206.519	208	215.818	201.667	204	137.825	137.829	135.128
103.484	103.642	105.994	104.487	105.484	105.115	127.265	121.479	121.082	242.308	229.167	236.083	201.583	200.727	183.154	211.633	219.02	206.885	187.929	219.286	193.167	203.2	139.5	140.587	133.068
104.177	102.498	104.733	104.639	104.682	107.096	126.273	122.064	122.799	229.917	203.769	237.25	194.364	182.538	189.154	215.347	218.571	200.077	200	226.9	200.308	215	136.693	139.041	133.968
103.801	101.045	104.629	104.331	104.991	103.809	124.447	121.512	120.653	238.833	219.5	237.667	201.583	192.364	193.667	218.104	219.898	206	216.615	208.769	190.154	213.6	137.87	138.994	135.039
104.396	101.856	104.382	104.855	104.136	105.817	128.181	121.858	121.94	238.769	217	244.833	197.5	188.818	197.462	213.796	210.654	200.923	194.923	209.385	196.545	206.9	137.406	138.601	134.474
103.261	102.01	104.032	105.487	106.514	105.968	127.237	121.122	121.393	232.417	224.083	225.308	200.167	183	179.167	215.837	216.481	198.962	198.538	238.7	188.154	198.538	137.368	140.453	135.047
102.905	101.476	105.92	104.324	107.469	104.697	127.673	121.938	123.278	234.167	222.25	239.417	195	187.917	183.308	212.041	217.755	202.654	203.385	208.538	195.462	207.5	137.387	138.256	135.768
103.959	102.658	105.554	103.28	105.927	104.74	127.425	121.291	121.786	234.25	217.167	237.75	189.273	175.214	194.615	216.469	220.49	204.731	194.667	209.077	201.182	198.077	138.193	137.638	134.679
102.987	103.128	103.337	106.381	105.038	105.49	125.743	120.697	121.392	233.583	222.846	231.923	197.5	187.25	196.5	209.125	225.833	200.212	199.167	232.5	201.583	185.7	138.303	137.222	134.31
102.725	104.157	103.978	103.67	106.18	105.483	126.978	120.865	121.093	235.583	216	237.583	186.615	194.833	187.385	223.667	213.635	203.981	215.833	218.769	201.5	192	137.061	138.251	134.173
103.399	102.895	107.273	104.699	104.381	105.609	126.883	122.049	122.364	249.667	224.667	229.077	182.923	201.455	183.25	212.551	222.3	202.173	204.083	210.615	194.231	193.9	137.5	138.812	135.086
102.079	104.329	104.795	103.802	105.43	105.351	127.177	121.082	122.774	235.75	218.083	234.167	199.25	176.231	191.385	221.396	221.096	197.769	218.273	211.769	199	204.417	138.311	137.571	135.194
103.345	102.3	105.269	103.914	104.532	105.676	126.479	121.445	120.971	229.167	231.077	227.385	180.5	186.545	188.667	216.167	219.519	199.077	208.091	219.385	192.769	196	137.525	138.051	133.593
103.013	101.843	104.451	105.009	108.137	106.022	128.604	120.877	121.487	233.667	216.917	236.083	195.583	190.091	196.462	211.479	218.558	205.981	205.692	217.75	161.364	198.2	140.063	138.152	135.585
103.794	102.246	104.752	103.547	105.908	103.875	126.499	120.852	122.971	236.833	216.167	236.923	178.083	199.833	185.615	215.286	223.94	199.038	195.5	223.75	199.846	200.083	138.079	136.614	134.617
102.901	102.703	102.202	103.464	106.857	104.6	126.445	121.769	122.154	233.385	219.75	226.5	188.786	196.909	183.083	212.979	212.481	200.981	207.545	216.462	191.25	195.077	136.902	137.057	133.965
102.744	103.326	104.262	105.471	105.038	105.081	127.573	121.013	121.424	246.5	214.667	230.083	198	170.154	175.5	218.163	217.923	205.52	200.5	210.538	196.846	206.7	136.392	137.787	134.541
102.911	102.214	104.595	105.063	106.056	105.574	127.4	120.764	122.456	231.833	226.9	233.25	179	174.917	191.769	221.857	216.673	206.74	195.333	211.077	194.417	202.5	138.298	137.066	134.777
103.449	102.323	104.599	103.737	104.29	106.375	124.735	121.033	121.639	222.167	222	238.667	185.25	184.231	181.385	218.041	216.115	203.521	201.417	218.385	192.769	195.8	135.441	136.519	135.389
102.728	103.224	104.029	106.306	105.474	104.185	126.781	119.976	123.011	240.833	215.154	232.833	186.154	197.455	194.385	211.521	221.02	198.32	199	232.7	194.909	198.154	137.117	136.149	135.117
104.307	104.131	102.877	105.936	106.071	107.089	126.761	120.733	120.785	229.75	227.1	239.917	190.615	190.091	192.4	214.667	215.827	203.021	195	224.455	200.154	190.333	135.234	136.25	134.248
103.731	102.696	103.525	105.607	106.136	105.253	126.754	121.839	121.545	244.364	217.692	235.167	193.917	186.9	188.083	224.469	217.827	205.96	196.75	218.3	194.667	201.692	137.104	136.692	134.389
105.378	102.812	104.104	104.322	105.09	106.489	126.688	119.419	121.058	236.545	215.583	217.417	191.929	189.75	182	214.312	214.885	206.66	212.833	234.9	187.769	194.2	138.5	135.486	134.939
103.436	103.442	102.767	105.885	105.653	106.128	126.969	120.791	121.498	233.417	211.333	235.667	192.583	176.308	202.727	221.792	216.769	196.481	202.923	199.25	189.667	192.462	136.273	136.652	135.048
104.229	102.099	104.319	104.263	105.589	105.266	126.622	123.123	123.022	234.846	210.091	227.231	181.167	183.846	202.545	224.104	226.653	206.8	192.583	214.364	201.667	204.083	135.88	136.308	134.525
101.968	103.379	103.946	105.12	106.994	106.196	124.405	123.009	121.453	236.462	216.083	229.692	177.231	186.545	197.231	218.102	223.019	201.654	207.214	206	200.846	221.727	137.371	135.984	136.128
104.377	102.294	104.679	105.974	105.592	105.055	126.971	122.976	122.395	247.909	219.583	228.545	192.25	186.273	196.75	206.8	214.058	204.385	211.167	221.25	194.769	197.417	138.987	137.205	133.57
103.205	103.503	103.274	103.656	106.905	104.74	126.754	121.367	121.814	245.4	226	237.417	193.167	180.538	200.818	225.958	219.385	205.577	194.833	202.923	192.667	201.333	137.886	137.078	135.753
105.315	102.767	105.066	104.154	104.44	107.101	125.989	120.671	122.044	236.167	213.583	225.692	180.923	189.308	194.5	222.542	212.46	203.173	201.692	199.917	202	201.385	138.864	136.908	135.277
104.06	104.631	104.697	104.76	105.714	105.115	125.734	122.74	122.165	254.1	220.833	225.077	182.25	192.667	200.091	217.729	214.42	197.88	196.385	209.8	200.308	207.333	138.14	135.608	136.498
104.826	102.872	103.965	106.227	104.608	107.255	126.185	121.748	123.205	229.545	206.417	232.167	191.545	186.364	187.833	216.604	213.981	203.212	208	205.615	204.462	205.083	136.057	136.048	134.394
102.994	102.153	103.956	106.003	106.445	104.099	125.438	122.555	121.626	227.25	223.231	235.417	193.083	192.75	204.909	217.96	212.346	204.231	210	222.308	196.667	198.154	138.509	136.67	134.623
103.514	104.707	103.3	102.857	105.324	105.618	125.954	123.036	120.891	230.308	217.333	234.154	187.385	184.167	192.636	219.917	220.2	204.615	203.154	205.583	184.917	204.833	136.994	133.683	134.778
104.49	103.381	102.407	104.847	105.606	105.281	125.815	122.907	121.241	253.7	219.364	228.5	190.308	195.364	201	217.583	218.365	206.577	220.917	223.769	198.636	205.818	136.434	135.779	134.815
105.016	103.603	104.737	104.45	105.505	107.067	126.569	121.516	121.469	234.154	213.583	240.417	185.538	183.538	184.833	221.562	220.604	206.08	199.154	224.077	185.5	186.5	137.759	135.219	133.822
103.991	103.756	105.233	105.575	105.832	105.451	127.069	121.261	121.612	226.923	215.5	215.909	184.769	193.364	179.167	219.812	215.48	196.288	192.091	207.25	194.667	218.818	136.297	135.487	135.186
103.978	102	105.202	104.221	105.674	104.59	127.806	121.824	123.299	228.667	219.75	253	179.462	189.25	198.5	213	213.654	195.692	204.455	209.385	200.273	188.857	139.259	135.987	136.263
101.972	102.119	104.696	105.029	105.167	104.237	126.34	122.949	121.661	241.909	223.091	231.364	207.545	191.75	188.333	221.104	220.058	194.365	201	206.231	197.538	212.909	139.133	136.324	135.263
102.943	103.195	106.859	103.829	105.294	104.927	126.133	122.879	122.338	233	210.154	222.917	187.615	188.545	188.364	217.917	217.708	207.04	205	197.846	189.818	210.545	136.753	137.036	137.206
103.313	103.006	103.907	107.101	104.316	104.904	125.724	121.658	122.815	231.909	226.727	224.5	194.833	186.455	186.083	220	218.52	203	196.462	211.923	198.583	200	138.665	137.445	136.26
105.159	102.473	105.549	104.503	106.119	106.425	125.819	121.237	120.883	219.417	217.167	235	191.692	187.364	176.714	221.396	215.88	203	197.917	203.846	209.833	206.583	137.772	137.203	134.102
103.339	103.517	103.155	103.237	105.05	105.477	125.419	121.821	122.646	233.231	217.727	239	187.833	190.091	176.846	220.312	213.423	206.64	206.273	215.846	198	197.538	135.937	136.889	134.66
103.035	104.022	105.385	104.22	105.192	104.472	125.312	122.612	121.449	218.308	205.462	218.929	190.091	193.75	177.077	219.354	216.135	207.229	202.083	222.5	187.923	207.818	137.511	134.846	133.729
103.528	103.01	104.939	104.502	105.442	105.65	126.764	122.231	122.951	238.615	208.167	224.333	183.333	181.182	180.846	220.021	213.958	209.354	206.417	207.462	187.818	198.455	136.368	137.825	134.184
103.958	102.363	105.984	105.12	106.503	104.76	127.674	121.453	121.506	218.154	225.308	228.667	194.091	182.231	189.769	219.229	213.596	201.84	207.417	214.231	190.571	198	139.568	137.314	135.21
103.013	102.517	104.182	103.387	104.372	106.393	125.746	121.594	120.993	255.909	217.75	220.929	188.846	196.091	186	222.042	222.271	205.44	195.154	231.917	192.364	203.917	138.429	136.829	135.708
104.047	102.835	103.811	104.471	103.511	103.341	127.357	122.872	121.432	228.846	225.5	205.214	193.917	185.75	188.75	222	215.365	213.58	205.692	211.308	202	207.583	137.863	135.858	134.468
103.243	102.054	104.904	105.144	104.355	103.249	127.456	121.605	123.676	236.273	210.615	212.429	180.846	187.5	179.667	214.083	218.062	207.771	220.5	209.818	186	213.727	138.62	136.592	133.216
103.685	103.987	105.712	104.359	104.551	105.997	125.991	120.675	123.466	240.462	221.545	220.833	202.583	177	190.182	224.917	209.038	206.667	201.083	215.455	194	212	137.987	135.638	134.611
104.582	103.627	104.064	104.152	104.325	105.913	126.593	121.175	122.454	229.769	215.923	217.75	188.364	190.5	189.167	221.347	218.596	206.229	192.667	204.308	191.923	202.091	139.228	136.044	134.019
102.146	104.691	105.518	103.716	104.907	106.38	125.845	122.274	121.788	236.273	222.769	233.333	187	196	196.231	223.979	217.98	202.375	199.143	207.231	186.143	202.545	136.406	136.535	134.111
104.35	103.75	104.653	105.638	105.246	105.183	127.062	123.278	122.064	242.615	229.5	218.455	195.833	179.545	201	221.042	222.833	205.44	194.917	205.385	203.5	197.417	139.279	137.104	134.089
103.402	102.006	103.76	105.163	104.971	103.481	128.232	123.204	122.978	227.583	219.909	222.071	191.818	185	202.667	214.188	220.12	210.1	209.385	212	210.818	207.545	138.44	136.371	132.854
104.035	101.291	104.64	104.478	106.187	105.366	125.356	122.493	121.121	239	221.583	225.25	192	194.667	192.333	219.312	214.962	203.792	201.385	217.75	197.091	198	138.5	136.775	134.57
103.137	103.006	103.917	104.59	105.45	105.211	127.502	121.595	122.254	229.154	243.7	230.833	185.923	193.727	194.455	220.408	219.167	206.82	203.231	211	199.083	197.667	139.345	136.677	135.636
103.472	103.054	104.243	104.452	103.88	105.032	125.35	122.989	120.382	240.083	224.182	222.462	203.455	188.364	193.333	225	218.146	199.16	205.154	210	196.091	201.308	138	137.364	134.623
102.807	102.732	105.409	105.374	104.675	106.099	126.002	121.949	122.066	224.846	212.692	226.667	195.727	186.5	191.833	217.188	215.46	202.192	213	203.077	193.25	200.5	139.25	135.635	136.104
104.247	101.885	104.388	104.808	105.115	105.45	126.548	121.956	122.504	237.167	233.6	234.545	192	185.417	180.846	219.184	216.583	201.712	196.667	219	192.083	195.5	138.987	134.906	134.81
103.623	102.359	104.502	103.545	104.606	104.038	126.967	122.36	121.551	244.167	235.364	214.071	197.545	192.75	178.538	217.438	224.14	204.75	206.231	234.6	181.769	202.5	136.679	137.266	134.772
102.946	102.776	103.984	102.969	104.472	105.042	126.923	121.619	122.091	221	225.538	221.5	189.636	194.833	202.727	216.938	219.854	205.24	204.25	203.615	195.917	205.364	137.203	136.616	134.041
104.949	101.385	103.17	102.94	104.632	104.994	126.991	122.201	121.419	233.667	215.692	211.929	187	205.455	194.667	221.082	216	206.981	205.182	219	194.273	202.917	139.613	135.632	134.121
103.419	102.208	104.013	105.794	103.901	105.667	126.604	122.062	121.416	223.25	226.615	227.727	185.417	202.636	190.231	218.245	221.125	203.7	209.308	214.917	198.385	194.909	138.345	136.308	134.453
104.621	102.545	103.044	103.864	104.599	106.417	127.338	121.131	123.093	230.538	237	229.727	191.083	181.417	190.25	221.979	219.208	205.66	206.929	208.923	210.833	201.583	136.513	136.079	134.123
102.776	101.849	103.877	105.246	104.329	105.628	126.932	121.918	119.969	234.154	204.083	233.5	197	192.5	184.692	224.708	218.26	202.827	202.462	203.214	201.583	196	136.62	135.902	136.372
103.443	101.679	104.136	106.329	104.961	105.529	126.756	121.81	120.501	232.25	237.8	240.083	183.615	191.182	190.667	218.082	215.1	203.115	198	212.231	195.364	197.583	137.416	135.457	135.633
100.057	103.942	104.362	105.209	105.24	104.85	126.754	120.345	121.384	237.75	219.462	221.923	189.818	182.833	190.846	220.5	223.396	202.64	201.357	216.923	199.273	191.333	136.53	138.613	135.092
103.473	103.096	104.615	105.593	104.831	105.22	127.584	122.483	122.722	243.667	217.417	231.364	187.846	187.583	184.25	216.896	221.08	200.096	199.769	218.231	182.786	193.833	137.354	135.79	136.294
103.703	103.17	103.946	103.557	105.814	105.907	125.976	122.024	122.955	232.583	216.231	242.667	199.6	181.846	190.333	214.878	216.44	206.458	217.5	219	181.583	195.917	135.889	136.506	136.111
103.047	103.204	103.356	105.894	104.753	105.553	126.894	121.821	120.905	232.25	208	260.5	185.077	191.364	183.714	219.146	223.896	203.22	210.167	237.1	187.917	196.462	136.044	134.613	136.478
101.943	102.528	103.632	106.097	105.261	105.01	126.817	121.586	122.486	221.833	220.538	220	185.846	179.462	198.917	219.312	217.812	202.22	195.846	224.154	204.25	196.615	136.749	138.987	136.525
103.377	101.067	105.111	104.212	105.997	105.461	126.664	121.706	123.015	227.154	223.923	232.909	185.25	185.417	203.636	222.333	222.231	205.88	220.182	216	202.9	199.333	137.522	137.462	135.544
101.453	103.513	104.475	105.151	104.816	103.651	124.447	123.295	122.355	235.25	211.385	214.286	198	190.333	191	214.42	220.667	204.816	208	212	189.818	201.818	138.038	137.517	136.142
103.342	102.197	104.028	103.587	104.936	105.455	126.978	122.188	122.982	234.154	212.083	225.833	193.25	184.1	192.6	213.64	222.917	208.885	215.083	229.9	201.417	206.727	136.051	136.779	136.167
102.387	103.403	102.089	105	104.587	105.311	124.668	122.57	121.425	236.75	225	224.214	205.182	183.727	204.273	219.042	224.083	208.38	213.364	231.8	187.25	214.727	136.346	136.715	135.766
102.652	103.413	104.047	104.981	105.58	104.59	125.181	122.417	122.378	241.692	236.8	227.667	201.364	188.25	199.455	218.438	217.5	210.72	203.083	216.417	209.545	207	136.028	138.193	134.494
103.823	102.974	103.445	104.415	106.025	105.022	125.215	120.925	122.861	243.75	205.154	226	195	176.143	204.5	215.16	216.34	207.64	210.5	221.923	194.917	203.545	137.826	136.396	134.833
105.067	101.962	104.611	105.452	104.94	105.454	126.566	122.438	122.634	230.538	216.846	229.143	197.273	180.462	181.154	218.76	220.083	200.34	203.636	221.154	179.286	196.75	136.248	136.449	134.978
102.457	102.45	104.792	105.375	106.262	104.675	125.698	122.126	123.356	242.5	216.583	229	193.455	169.615	181.769	219.796	227.583	202.808	209.333	218.167	196.5	194.167	138.286	135.771	135.278
103.725	101.541	104.026	104.288	106.241	102.991	127.031	122.271	121.894	240.583	210.769	233	196.273	189.083	186.333	220.34	215.92	212.146	198.583	216.077	201	222	136.649	136.353	135.215
103.443	102.574	103.709	104.753	105.579	106.228	126.152	121.112	123.456	249.083	207.308	257.9	198.182	186.75	174.643	209.42	222.86	208.625	215.083	217.385	203.364	203.636	139.111	136.682	135.187
105.044	102.33	103.529	106.182	105.136	106.157	127.031	121.451	122.843	227.538	211.077	219.308	204.364	177.5	183.5	213.308	220.812	205.86	194.818	236.25	199.333	197.333	136.668	137.413	135.516
103.913	102.46	104.87	105.096	106.133	105.282	127.679	121.768	123.563	227.385	219.462	225.333	195	180.571	191.636	215.347	216.083	204	206.727	225.833	199.167	206.273	135.877	137.342	135.68
104	102.767	104.822	106.298	105.766	104.339	126.753	122.192	123.325	243.25	226.182	223.385	194.923	183.917	195.727	212.731	217.18	208	197.182	223.583	199	198.583	135.946	136.029	135.535
103.405	104.219	105.252	105.016	105.549	104.374	125.697	122.161	123.667	232.615	221	234.231	188.615	195.909	198.364	214.538	224.5	210.708	209	227.231	197.846	197.917	136.378	138.688	133.725
103.152	100.83	102.937	103.411	106.601	106.256	125.701	121.473	122.607	239.667	211.667	224.769	194.455	180.917	190.818	217.22	221	211.333	200.4	214.846	203.455	199.417	138.127	139.471	136.038
103.772	102.093	103.927	104.446	104.563	105.663	126.555	121.34	122.33	227.538	215.231	225.231	181.615	198	195.364	224.18	224.479	208.125	193.583	234.25	192.909	205.083	135.386	138.106	135.209
102.681	102.872	103.543	104.795	105.569	104.752	126.436	121.509	124.009	232.083	235	227.692	193.417	178.769	196.5	212.75	225.125	201.72	190.538	227.917	200.167	200.846	136.035	137.127	134.272
105.617	102.134	104.243	104.288	105.013	105.748	125.945	122.579	123.402	235.417	210.167	224	200.417	186.667	186.182	213.231	225.188	207.208	188.077	218.167	201.909	205.545	137.807	136.805	134.557
102.583	104.108	104.555	104.731	103.823	104.956	127.083	122.241	123.81	245	216.091	238.364	201.5	201.909	199.545	210.442	219.583	208.46	207.083	218.538	189.154	191.25	137.791	138.806	135.358
102.585	102.123	105.006	105.109	105.948	105.314	126.399	121.024	123.606	238.333	211.077	231.615	194.818	191.818	197.273	213.306	218.396	204.74	195.727	226.333	191.833	201.923	137.589	140.12	132.886
102.747	103.192	104.086	103.599	104.981	105.546	126.113	121.024	123.854	241	222.818	244.692	199.833	189.333	195.273	209.596	224.333	204.96	194.9	235	203	195.231	139.003	136.626	135.937
102.633	102.06	103.987	104.221	105.942	103.891	125.734	122.119	123.821	238.231	233.727	217.929	202.417	196.083	180.923	211.154	223.417	207.771	180.077	225.75	196.583	201.167	136.133	140.052	135.095
101.726	102.239	105.232	104.853	105.485	105.256	125.315	121.932	124.366	224.385	212.538	234.083	194.833	182.357	197.364	211.058	218.38	202.917	195.692	223.25	193.083	204.538	137.623	138.61	135.101
103.5	102.615	105.261	104.933	105.939	105.574	127.403	121.872	122.609	242.583	215.364	239.2	179.769	187.917	183	206.885	229.6	202.854	204.636	210.167	199.636	204	137.528	138.971	135.827
102.79	102.7	104.715	104.899	106.471	106.65	127.242	122.344	124.513	220	224.75	245.1	182.923	191.167	185.083	208.231	228.542	202.688	175.667	212.667	204.167	203.667	136.352	137.981	133.41
104.522	102.51	104.117	103.157	105.326	105.848	128.379	122.633	122.263	231.417	216	222.929	187.083	197.75	185.455	212.192	223.979	209.939	194.357	217.923	190.917	187.667	136.655	137.66	135.776
103.683	102.478	104.437	106.579	104.202	104.646	127.002	122.942	121.683	241.75	216.692	215.857	202.909	184.385	184.091	211.442	224.396	207.771	196.167	228.846	192.538	201.25	136.794	137.387	135.544
105.057	101.624	103.727	104.758	105.577	104.186	126.611	122.686	123.264	240	220.538	225.083	203.182	199	189.667	212.615	215.32	206.771	193.25	226.385	200.25	204.833	137.724	138.146	133.066
103.718	101.882	105.36	104.179	104.285	104.272	126.434	121.601	121.515	250	240.4	218.417	187.818	192.167	192.273	216.423	216.66	212.286	201.833	216.833	197.333	189.615	137.435	138.406	134.292
101.997	101.596	102.805	103.468	105.115	104.383	125.447	122.344	122.556	229.692	215.615	230.833	209.909	200.75	187.75	219.796	217.062	209.729	203.417	212.75	189.545	194.167	138.883	138.535	134.902
103.051	102.138	103.41	103.92	105.594	103.892	127.412	122.237	122.394	237.75	208.273	231.333	192.846	194.455	177.909	210.365	227.375	207.44	201.167	213.167	197.923	199.154	137.766	138.894	134.161
102.384	101.869	104.64	103.252	105.381	105.201	127.537	123.081	124.518	245.667	208.692	229.167	201.308	188.462	184.154	212.577	225.188	201.942	204.083	217.846	183.462	206.667	137.778	137.994	136.886
104.161	102.921	104.448	103.099	104.923	104.494	125.914	121.874	121.794	229.462	218.615	221.833	205.273	192.75	190.167	212.019	222.25	204.333	194.75	209.667	205.917	203.917	137.149	137.192	135.497
103.997	102.149	104.763	104.952	105.367	104.89	124.022	121.429	124.257	234.75	227.545	229.833	192.308	172.214	186.455	217.712	221.75	199.3	210.455	213.667	197.923	199.923	139.692	136.304	133.481
103.207	102.161	103.278	104.492	105.629	105.135	127.823	121.372	123.394	258.333	241	226.25	197.545	186.5	192.333	214.5	220.833	202.115	191.923	204.583	189.083	204	137.877	137.788	134.003
102.91	102.274	105.635	104.894	105.244	105.868	126.816	120.525	122.02	241.417	235.8	216.143	206.273	187.583	181.333	216.865	229.333	206.58	197.182	225.1	183	218.083	138.406	135.063	133.603
102.366	103.307	104.628	103.786	105.463	104.909	126.468	120.758	123.004	256.5	215.923	230.667	193.615	193.25	185.5	212.231	215.083	205.708	191.917	229.692	196	204.083	137.108	138.365	133.972
103.852	103.298	103.341	104.167	104.682	105.484	127.989	122.254	122.454	247.667	236.2	224.25	207.833	197.167	179.364	219.288	216.833	206.188	208	218.923	198.167	203	136.956	137.708	133.405
104.204	102.21	105.519	105.458	104.551	106.183	127.476	120.878	122.792	244.833	229.182	230.286	190.923	179.077	184.833	212.769	221.875	201.6	202.692	208.231	188.385	198	138.933	136.383	133.196
102.214	103.074	105.655	104.627	103.416	105.052	127.035	121.419	122.7	228.462	212	218	199.308	193.545	181.182	217.5	217.167	209.68	198.25	225.455	195.3	211.917	139.171	136.189	132.859
101.089	102.946	106.585	104.939	103.81	107.022	125.803	121.284	122.67	249.833	218.846	220.714	198.909	185.917	187.167	215.288	219.34	209.56	196.692	231.5	188.667	201.769	138.022	135.01	134.959
103.334	102.324	102.946	104.942	105.339	104.505	127.77	120.858	122.295	240.667	218.636	226.786	202.75	202	193.417	214.942	223.812	206.438	193.75	228.727	195.692	192.308	137.933	137.829	134.528
103.111	103.073	105.417	104.718	105.634	105.211	126.731	121.299	122.268	229	216.923	224.917	204.583	190.417	183.583	221.308	217.08	206.26	197.615	208.923	196.417	212.667	137.003	138.334	135.721
102.802	105.253	105.38	103.99	106.573	105.347	127.668	122.345	122.373	238	217.846	242.5	195.385	190.333	188.667	219.365	222.167	198.667	199.833	231.3	194.545	203.583	137.708	136.51	134.245
102.392	104.505	104.416	105.236	105.335	103.741	127.765	120.912	122.312	237	216.462	223.75	200.917	177.308	181.75	211.481	219.083	205.062	204.667	241.4	191.417	203.167	138.752	136.669	135.835
102.527	101.865	103.763	104	105.297	103.906	126.425	122.284	121.247	251.5	203.154	212.333	201.909	198.333	192.583	212.712	224.92	206.04	189.923	227	199.083	207.083	137.695	137.364	136.203
102.206	102.702	103.618	105.564	107.604	105.669	126.471	121.261	122.209	247.833	213	220.25	195.231	196.818	182.167	211.615	221.14	204.308	199.833	225	190.154	205.167	136.858	136.901	134.215
104.278	103.599	103.129	105.252	105.484	103.523	127.445	122.906	122.81	254.083	211.727	221	187.615	179.417	189.417	213.404	216.49	203.808	203.091	205.333	199.083	210.417	137.082	137.511	135.968
103.479	103.035	103.883	104.138	104.645	105.558	126.529	121.232	122.566	246.167	219.909	215.308	205.455	195.273	182.846	217.577	216.583	207.52	192.692	206.333	190.75	205.667	137.668	136.441	136.892
104.083	102.642	103.46	104.747	106.725	105.184	127.616	122.088	123.759	222.769	213.923	226.545	189.308	194.273	190.167	213.5	220.68	196.16	190.071	203.273	188.231	196.636	138.559	136.864	134.498
102.912	102.946	104.392	105.186	104.506	103.923	127.774	120.029	123.549	228.846	225.727	226.167	200	180.75	203.833	212.615	219.923	208.269	198.769	212.833	187.538	210.818	138.75	137.41	136.596
102.769	102.978	104.469	105.114	105.668	104.081	126.592	121.456	124.591	246.75	239.5	217	188.818	187.692	180.308	217.577	226.375	205.36	193.583	227.667	201.364	211	138.487	134.677	135.917
103.019	102.695	103.861	106.016	104.124	103.546	128.458	122.27	123.078	237.75	215.231	227.25	190	189.25	190.917	216.731	223.812	203.058	196.154	203.917	184.75	206.909	137.659	136.098	134.727
104.613	103.668	103.546	102.22	104.684	105.768	128.673	122.033	123.106	231.846	235.8	223.5	195.333	186.917	193.692	217.224	213.98	202.898	195.25	226.1	184.75	195.615	139.441	136.76	135.471
103.984	102.115	103.155	103.43	105.661	103.503	127.19	121.506	123.367	243.833	215.182	230.417	199.727	186.417	186	215.885	223.833	205.78	199.929	210.154	191.083	198.75	137.07	135.839	135.393
102.764	101.452	105.142	105.322	106.1	105.282	127.868	121.04	122.563	234.231	213.846	228	200.727	185.917	192.538	226.939	227.354	210.562	198.917	229.417	192.75	205.667	139.31	136.642	135.389
102.44	102.271	104.09	104.679	104.396	104.25	127.084	121.082	123.305	233.333	222.083	229.769	193.25	178	194.083	217.096	227.292	203.615	196.455	212.462	200.75	215.167	137.35	137.178	134.461
102.958	102.894	102.338	103.91	104.047	104.373	127.733	122.009	122.229	229.333	232.273	220.25	197.077	182.5	185.667	222.596	225.333	201.827	194.571	205.833	200	212.727	137.693	135.33	134.497
103.824	103.673	103.205	103.391	105.362	104.628	127.289	121.406	123.43	231.25	218.308	214.692	199	181.385	192.333	216.038	223.875	204.667	202.5	227.583	187.083	209.75	140.942	137.801	133.275
104.425	102.692	103.354	103.423	105.17	104.772	127.722	122.053	122.928	237.833	248.1	222.083	194.636	183.5	187.667	221.865	219.898	209.481	195.333	193.769	191.154	195.818	139.532	135.212	134.968
103.617	104.256	102.066	104.209	104.129	104.891	126.497	122.127	123.188	233.083	243	230.923	197	187.385	181.923	222.654	222.92	205.083	187.083	208.615	194.167	208.417	139.972	135.91	135.168
102.972	103.696	104.871	104.717	105.063	105.623	128.061	121.186	123.716	226.083	242.077	226.077	203.727	195.167	192.75	212.923	209.7	211	197.231	211.5	198.273	208.583	137.691	136.613	134.56
103.348	104.356	104.147	103.051	106.891	103.708	126.737	121.602	123.215	232.417	219.923	216.917	197.385	189.75	199.333	219.308	225.667	213.646	209.727	204.167	195.333	219.818	138.025	137.478	134.108
103.5	101.712	104.994	105.103	105.927	104.038	126.842	121.678	123.135	234.583	219.692	221.5	189.923	187.818	189.833	227.635	215.958	209.6	195.545	227	203.583	206.25	138.79	136.335	136.006
104.362	102.744	104.164	105.204	104.638	106.096	126.715	122.407	121.126	242.167	235.667	228	195.667	183.909	193.917	216.788	211.188	205.74	200.357	210.333	198.417	213.333	138.184	136.877	135.057
106.022	102.949	104.546	106.094	105.874	105.347	128.031	120.281	123.073	229.154	217.692	219.462	198.273	192.091	189.818	218.962	222.62	208.74	202.538	210	193.833	201	139.293	135.46	132.962
103.823	104.471	103.312	104.048	106.917	105.699	127.151	120.989	121.775	238.75	213.308	223.083	192.667	183.846	194.333	225.885	223.776	204.9	200.923	215.25	205.455	204.75	138.936	137.462	136.082
105.079	102.953	103.978	104.763	103.294	103.454	128.546	121.181	123.711	227.083	252.9	225.615	192.615	193.5	190.727	217.135	224.062	208.42	205.7	210	207	200.333	140.06	138.257	133.889
102.253	102.968	105.669	104.106	105.177	104.575	127.594	121.185	122.333	224.583	222.083	229.308	199.909	188.167	195.333	217.75	213.46	211.688	203.462	221.923	201.636	205.182	139.282	137.706	135.801
103.256	102.256	103.907	104.702	105.291	105.874	126.876	121.356	122.376	229.667	230.154	223	200.917	186.9	201.333	213.981	224.52	207.667	205.455	229.083	186.083	200.083	140.051	136.358	132.962
103.276	102.474	104.862	103.604	105.467	103.934	127.351	121.403	121.407	242.417	223.615	226.167	181.077	181.786	184.583	218.615	223.583	208.84	188.5	241.154	198.643	207.909	140.108	136.975	134.348
103.726	102.054	102.732	104.625	105.086	103.661	129.04	120.931	122.684	221.167	242.167	225.333	184.077	184.923	189.364	218.365	221.52	205.42	214.231	240.167	193.75	208.364	138.764	136.342	134.101
102.738	102.83	104.806	104.74	104.861	105.205	128.5	122.082	123.435	223.833	217.692	219.615	203.545	186.667	195.727	215.731	219.438	206.42	200.917	235.385	189.091	205.583	138.253	137.362	133.385
104.157	104.308	105.353	105.516	105.12	104.362	126.843	120.155	122.459	228.417	229.727	220.846	187.636	194.917	192.667	215.75	219.02	208.917	189.5	223.333	198.818	210.091	138.495	136.092	133.943
103.978	103.81	103.738	106.294	105.191	105.49	126.394	121.342	123.993	227.833	228.615	217.75	204.917	186.5	182.429	224.551	219.02	205.5	195.154	224.846	206.5	203.167	138.239	137.416	136.256
104.907	102.779	103.449	105.599	103.709	104.987	128.018	120.644	123.062	239.917	225.231	223.833	202.091	196.917	194	222.385	211.38	200.423	194.455	222.833	199.143	197.333	138.049	137.425	134.082
102.813	103.134	105.506	104.417	105.195	104.962	127.102	122.131	122.555	237.462	221.692	225.5	202	188.833	188.818	221.02	218.896	203.583	195.25	214.167	195.636	216.364	140.035	137.734	132.712
103.522	103.33	105.103	104.641	103.806	103.589	129.424	122.83	123.363	232.75	228.923	217.833	201.833	202	183.917	217.519	229.531	199.042	202.917	210.417	197.4	213	136.956	138.108	134.465
103.926	103.311	104.94	103.401	106.028	104.92	127.186	122.865	122.751	238.231	229.909	216.5	191.25	181.583	191	223.077	221.167	202.82	192.818	239.917	215.333	192.25	136.279	135.057	135.032
102.771	103.207	105.16	105.498	106.341	104.385	124.736	122.29	123.639	245	253.8	229.75	203.091	181.636	173.143	222.231	212.66	202.88	202.917	216.417	191.167	210.909	137.503	134.896	134.324
103.666	103.234	103.585	105.532	105.601	108.006	127.106	122.889	120.936	225.077	220.692	219.25	211.182	183.154	173.429	218.019	217.354	202.84	212.6	220.154	218.25	194	137.487	135.267	133.563
103.827	102.923	103.703	103.035	104.746	106.044	127.04	121.865	122.19	232.75	232.583	220.5	214.167	185.727	193.75	219.408	211.36	203.854	218.727	223.833	194.833	206.417	136.792	136.981	133.253
104.45	102.974	104.073	103.635	105.615	105.481	128.053	122.31	121.72	235.167	216.385	225.417	191.583	186.083	185.333	219.212	220.542	203.18	201	221.333	208.083	209.833	137.711	138.479	134.636
105.29	101.618	104.794	103.402	104.784	105.195	127.317	121.503	122.817	233.077	231.154	224.833	197.462	185.077	177.333	224.635	221.583	199.875	197.615	223.417	189.167	183.538	138.825	136.206	135.468
102.503	103.199	104.464	104.971	106.489	103.288	128.077	122.933	121.656	236.154	226.231	223.667	183.308	185.615	190.75	224.18	216.667	203.56	192.75	210.833	204.417	200.727	136.335	134.708	136.608
102.548	102.965	105.048	104.737	104.987	105.699	125.976	123.134	122.568	240.667	238.333	218.75	190.417	194.083	185.417	218.551	219.22	203.16	223.083	212	196.75	197.077	138.098	137.867	135.288
105.029	102.551	103.151	103.435	104.843	105.942	127.562	122.98	122.991	238	232	210.083	194.75	178.214	186.583	208.939	222.816	206.28	211.8	217.769	207	201.818	137.633	135.984	134.332
101.874	101.728	103.089	103.644	104.82	105.301	125.075	122.346	124.198	241.667	220.833	216.917	183.385	183.5	175.462	220.385	215.14	204.86	205.077	213.417	195	204.545	138.709	136.13	132.554
102.408	102.486	103.12	105.843	105.132	102.829	127.004	120.322	122.775	247.75	221.167	215	189.357	195.667	187.583	217.327	217.292	206.615	211.154	211.538	206.5	210.091	138.479	137.587	136.095
103.623	103.23	104.621	104.452	105.705	104.705	126.027	121.092	122.172	238.083	224.455	242	199.583	181.154	188.615	218.51	218.28	209.12	194.615	220.333	200.5	196.583	136.829	137.746	133.275
103.204	102.421	104.421	105.332	104.796	106.287	124.888	121.458	124.797	239.917	219.583	213	203.833	186.333	187.417	219.538	214.52	200.231	213.25	210.417	208.462	206.091	137.4	137.511	135.829
103.892	101.112	103.118	104.668	106.346	104.363	127.241	123.131	122.846	233.583	229.385	217.846	198.333	188.833	173.667	218.327	211.3	202.173	209.909	221.583	202.833	218.273	136.946	135.987	132.269
103.808	103.439	104.111	104.567	104.432	104.386	126.784	122.691	122.434	225.231	217.462	217.167	196.417	193.25	183.417	227.714	221.878	203.596	211.154	207.25	200.636	219.091	137.479	136.825	133.218
103.514	103.503	102.291	104.808	105.262	105.748	125.887	121.934	123.696	241.75	228.833	226.167	206.083	177.333	180.5	215.2	223.367	205.788	197.462	222.846	201	197.308	137.117	136.321	132.665
103.329	102.503	103.091	104.272	104.358	105.212	126.051	122.152	124.172	235.583	231.25	219.167	193.25	190.417	183.308	215.212	212.96	199.712	209.833	226.083	200.385	199.667	136.784	136.19	132.766
102.826	102.083	104.109	103.706	102.889	103.987	126.062	121.838	122.064	234.769	228.917	216.25	198.917	184	187.846	217.54	215.86	207.531	207.917	217.25	200.786	206.917	138.274	138.432	133.332
102.848	101.183	103.341	105.529	104.209	104.994	126.257	122.521	122.565	234.692	225.538	221.083	196.364	180.583	183.417	216.096	223.204	199.25	210.846	218.667	203.167	211.5	137.446	137.127	134.823
102.598	102.16	103.29	105.773	105.2	105.025	125.084	122.583	124.881	237.538	221.5	215.769	206	179.385	177.923	214.449	219.396	200.5	213.667	205.667	193.5	201.364	138.916	138.737	134.168
104.006	103.133	104.905	104.92	103.843	105.372	124.903	121.487	122.088	243.417	225.909	225.417	190.545	175.917	185.231	219.058	221.633	204.692	215.846	214.167	198.25	194.5	137.901	136.587	132.402
103.484	101.429	104.659	104.972	105.044	104.038	126.095	121.179	122.446	232.923	229.75	214.75	202.083	188.818	184.462	221.551	219.96	201.615	210.417	204.692	188.417	206.583	138.297	138.219	134.016
102.644	102.386	104.077	104.316	104.487	104.066	125.887	123.088	123.969	227.833	231.667	212.667	192.667	185.5	183.385	225.365	212.06	209.077	204.833	217.75	195.231	202.727	138.411	136.051	135.354
103.057	102.359	104.43	102.562	105.843	104.373	126.574	123.467	123.108	240.583	230.417	214.667	195.182	185.083	179.417	220.962	222.646	204.5	236.333	212.385	194.833	206.455	138.592	136.454	134.165
103.718	104.377	104.128	104.519	104.648	105.163	126.298	121.528	123.345	241.25	230.167	226.75	186.538	183.667	177.667	223.92	216.22	201.731	200.083	219.75	210.818	190.857	137.526	136.788	131.117
103.522	101.848	106.531	105.74	104.557	104.802	126.73	120.638	122.976	241.917	235.833	224.167	192.167	177.231	179.692	225.558	214.02	193.481	204.917	210.154	205.615	190.917	134.933	135.219	132.022
103.154	102.859	103.58	104.71	106.238	105.088	124.882	121.531	123.873	247.75	220.083	225.5	203.25	181.636	184.231	226.51	216.981	203.154	217.75	210.833	191.917	199.923	139.473	137.324	132.563
102.924	102.486	103.267	105.631	105.822	105.389	126.607	120.322	122.653	243.333	230.167	220.167	200.545	175.923	178.308	226.082	217.68	208.78	205.75	203.308	196.25	200.5	138.658	138.016	132.778
102	101.294	104.292	104.532	104.627	103.856	127.31	122.515	123.215	242.333	232.833	223	205.083	199.091	177.769	214.592	214.86	205.577	200	202.846	203.308	196.182	138.948	135.325	133.387
103.683	101.953	103.239	105.548	105.728	104.234	128.542	121.586	123.132	242	220.917	220.333	191.909	186.231	197.4	228.82	217.56	209.32	216.833	201	194.769	205.091	137.13	138.403	134.269
102.82	102.396	105.103	103.284	104.435	104.35	127.364	120.856	123.425	238.083	215.833	238.5	200.833	188.75	184.923	222.041	209.538	209.458	199.846	224.846	194.385	200.385	136.356	137.606	132.573
102.775	102.975	104.191	103.058	106.01	106.261	126.774	121.745	124.453	260.5	226.545	224.25	198.727	191.545	185.923	222.077	214.904	202.635	205.923	227.154	201.917	203.417	137.437	136.569	132.598
102.703	102.551	104.304	104.265	104.872	105.85	127.456	121.751	122.874	232.692	228.583	222.5	193	184.357	179.917	220.808	211.88	199.26	211.833	230.545	200.769	199.75	137.225	136.404	132.142
101.604	101.64	103.867	105.026	105.301	103.662	126.163	121.989	123.957	228	217.385	225	201.091	184.083	173	224.898	215.115	207.812	205.909	251.9	202.833	200.333	135.581	137.5	132.399
103.085	101.673	104.048	105.211	105.192	105.455	125.81	121.812	123.504	233.833	224.75	234.417	204.917	194.545	178	221.423	213	195.423	204	247.8	189.75	201.538	136.895	138.432	133.456
102.288	101.655	104.038	104.064	104.131	107.612	127.278	121.315	123.476	233.615	232.167	226.25	197.75	181.286	173.923	222.9	211.769	206.6	202.214	214.154	205.077	198.167	138.937	136.472	134.07
102.25	101.965	102.527	104.642	106.083	104.026	126.609	122.018	123.368	224.833	223.308	227.833	196.417	181.667	182.182	218.404	212.173	203.36	200.583	252.5	195.417	208.083	134.832	136.489	133.016
102.902	101.529	103.812	104.214	104.415	106.132	128.553	120.987	123.156	230.5	216.462	236.583	188.583	184.583	189.3	216.635	211.846	203.84	219.833	221.769	200.25	205.083	135.737	138.258	132.554
101.284	102.904	104.326	104.637	105.142	104.39	126.735	122.018	123.361	242.583	230.417	229.25	188.8	174.077	174.583	227.224	215.423	214.16	206.692	240.3	190.857	185.286	136.441	140.347	135.149
102.349	102.032	104.47	105.522	103.403	104.083	124.377	122.736	123.291	240.538	231.538	226.333	196.545	191.917	182.692	220.68	213.1	203.333	201.077	211.692	200.833	201.5	136.33	136.143	134.165
103.189	102.796	104.36	106.609	105.396	103.202	127.437	121.222	123.064	236.917	211.231	222.583	194.583	192.182	182.833	221.462	210.942	202.86	203.154	245	200.833	199	135.582	139.075	135.24
104.244	102.513	103.949	104.615	104.946	106.49	126.615	122.6	124.306	228	229.417	221.167	199.333	185.75	188	226.224	212.442	208.12	208.385	213.583	192.923	199.333	136.346	139.532	132.257
104.156	102.519	105.275	105.067	103.092	103.045	127.71	120.894	122.752	229.083	225.917	226.583	195.091	181.615	182.538	221.26	213.462	197.62	213.833	222.923	202.545	212.909	135.832	136.529	132.94
104.083	101.735	104.408	104.691	104.737	103.93	126.022	121.443	123.657	221.75	230.25	232.333	195.923	168.692	175.583	221.442	217.62	205.08	208.929	216.692	194.923	207.417	136.285	139.065	134.205
104.37	102.303	104.283	104.816	104.972	106.016	126.432	122.166	124.592	234.462	232.25	213.615	195	183.462	184.615	221.833	215.327	206.82	217.75	214.462	206.167	197.917	137.097	137.926	133.814
103.487	101.675	102.073	105.628	104.583	104.584	126.72	121.817	123.434	236.231	220.75	229.167	201.545	189	188.909	224.959	217.16	203.5	202.167	231.7	190.923	213.417	135.003	138.699	134.145
102.402	102.092	105.153	104.961	104.553	103.755	126.099	121.518	123.068	245.917	226.167	206.833	196.091	200.833	181.692	217.865	222.688	206.08	216.846	233.8	200.385	195.615	137.038	137.419	134.107
103.902	104.75	106.115	105.224	105.418	104.009	127.508	121.219	124.082	226.25	235.091	215.143	188.846	179.385	184.091	217.288	207.385	207.32	213.167	217	206.583	211.909	135.06	135.31	133.147
103.432	103.042	103.646	105.058	104.245	103.476	127.283	122.656	123.737	245.333	232.833	228.083	192.583	199.909	177.75	225.173	214.481	203.86	216.846	245.5	198.75	202.25	138.324	136.225	132.368
101.804	102.347	102.048	104.942	105.842	103.042	127.509	122.492	123.415	236.167	232.75	212.5	199.917	180.308	185.3	220.812	206.865	207.42	194.077	209.769	209.833	194.615	137.003	136.822	134.743
102.686	101.756	102.404	105.243	104.42	103.927	127.541	121.355	123.179	244.769	231	214.231	195.417	179.615	197.3	222.7	219.163	206.32	206.154	224.3	200.154	206.364	137.913	138.385	132.825
104.627	102.08	103.952	104.969	103.816	105.739	127.58	122.802	123.567	229.333	237.75	214.25	194.636	194.818	186.286	220.288	214.077	201.058	211.667	232.9	190.667	217.727	138.498	136.472	133.41
104.764	101.596	103.897	104.026	104.503	104.484	127.46	120.761	123.263	231.833	216.583	206.333	205.545	184.667	184.917	222.32	211.096	207.577	208.417	243.7	208.75	209.364	136.298	137.016	132.927
103.096	102.054	104.817	104.974	105.449	105.026	126.46	121.463	123.254	244.667	219.667	224.083	198.364	187.455	180.75	218.729	220.173	204.596	221.455	234.7	206.417	196.077	137.137	137.744	134.231
103.486	102.603	104.927	105.146	104.652	104.805	126.374	120.969	124.069	234.083	218.462	210	191.333	198.167	187.462	222.42	209.038	195.25	202.077	218.333	193.846	186.643	137.557	138.196	133.794
103.508	101.826	103.575	105.494	105.426	102.816	126.481	120.98	124.281	239.417	226.25	217.615	201.083	189	184.167	222.86	216.635	203.18	208.417	227	212.167	217.636	138.292	135.854	133.465
101.817	101.696	105.726	105.203	106.013	102.952	127.44	122.475	125.631	242.231	228.833	229.833	185.5	190.667	178.083	218.269	217.865	202.519	212.538	213.5	196.846	195	137.4	136.965	132.956
103.991	103.006	105.716	104.252	105.641	103.522	126.051	121.764	124.779	237.667	233.833	215.5	192.923	202.727	177.846	223.74	214.25	203.519	222.333	217.692	186.769	193.692	137.806	136.151	133.338
104.022	102.083	103.908	105.282	106.417	103.933	126.339	121.848	125.262	235.833	229.833	226.667	193.583	185	188.917	215.429	205.981	204.673	219.083	224.25	199.333	199.75	138.4	134.994	132.18
104.256	101.801	104.167	104.243	106.174	105.631	124.892	122.27	124.291	235.167	228.833	242.7	199.727	175.846	186.5	221.042	217.212	199.827	216.273	224.923	197	196.545	137.73	137.103	133.744
103.652	101.923	103.082	105.067	104.456	104.274	125.327	120.989	123.965	253	231.333	219.167	197	192.727	198.9	220.04	212.231	204.596	230.5	214.538	202.667	208.364	137.013	135.765	133.987
102.387	102.484	103.732	104.901	104.168	103.764	126.387	123.265	123.374	234.5	231	225.667	210.083	186.417	189.5	217.429	218.212	205.635	209.417	209.231	207.25	209.818	139.022	137.864	132.81
103.302	101.558	103.65	104.674	105.239	104.115	128.273	122.457	125.044	244.667	222	210.167	192.083	174.769	177.667	228.78	212.904	206.731	212.385	213.385	204.167	202.615	137.352	135.545	134.494
104.672	103.484	103.301	104.87	106.432	104.294	126.954	123.224	123.913	245.25	222.833	220.333	184.833	183.462	186.083	221.292	209.904	199.904	204.917	214.462	185.083	200.538	138.219	137.216	134.451
101.541	101.962	103.524	105.277	107.404	104.372	127.043	121.936	124.108	232.692	217.75	222.083	190.75	179.923	186.846	225	212.654	204.538	216.417	212.385	193.083	206.636	137.832	135.104	136.314
103.199	102.636	104.183	104.997	105.478	104.074	125.615	122.002	124.653	232.692	206	209	192.727	195.545	197.5	223.5	216.173	204.135	217	230.75	205.182	215.455	139.365	138.797	133.732
103.17	102.251	104.281	104.897	104.057	103.24	126.219	121.819	124.405	243.5	221.583	217.583	201.182	198	189.6	221.3	211.827	204.712	206.333	225.385	197.909	214.091	138.413	138.554	135.115
103.794	102	103.877	105.955	104.272	105.434	127.785	121.748	122.09	239.083	210.917	217.917	190.455	173.615	170.923	215.327	213.962	210.5	199.583	226.833	203.25	207.455	138.693	138.331	134.383
104.33	100.853	103.407	104.208	105.301	106.847	127.957	122.242	124.5	235.917	223.333	217.667	208.083	191.308	181.231	223.918	217.538	199.692	202.154	219.583	203.455	213.455	139.063	137.608	134.865
104.869	103.221	103.117	104.871	104.684	103.337	127.07	123.152	124.155	229.538	237.667	220.385	194.833	191.5	176.769	224.98	215.346	203.021	215	215.077	199.692	194.167	138.892	138.179	131.756
101.709	102.256	104.006	105.124	106.581	105.016	126.608	122.46	123.761	240.417	224.083	210.385	188.385	185.692	188.727	227.72	218.776	201.346	222.7	223.167	193.333	198.909	138.743	135.407	135.677
102.784	103.532	102.215	104.687	104.943	102.291	128.188	121.736	123.458	251.417	230.231	220.667	199.833	199.333	181.636	226.058	216.962	193.981	213.727	204.385	212.333	197.167	137.463	137.54	134.616
105.711	100.756	103.334	104.652	104.716	104.435	130.184	123.231	123.927	236.769	220.917	208	203.455	184.846	193.455	219.878	219.692	200.635	231.636	230.667	190.643	209	137.702	137.994	133.635
102.623	102.851	103.767	105.674	105.173	103.503	127.9	121.657	122.126	234	215.077	231.083	194.364	196.636	195.333	225.02	215.788	207.542	219.3	217.231	192.083	205.636	137.806	135.698	132.013
104.032	103.124	105.372	105.952	104.754	103.155	125.52	123.236	124.785	231	230	210.5	195.455	197.75	184.286	221.776	217.019	199.962	211.5	222.333	197.333	213.909	137.727	135.244	133.981
103.457	103.3	104.109	104.608	105.231	104.244	127.451	120.825	125.073	241.231	213.333	219.5	193.2	181	184.083	219.224	219.423	208.917	208.75	216	203.417	203.833	137.68	135.956	133.035
105.083	102.57	104.819	106.684	106.146	104.119	126.832	123.297	123.958	257.833	227.833	219.308	196	193.727	194.833	223.7	211.115	201.479	214.273	218.5	205.333	196.462	139.102	136.364	133.5
104.406	102.478	103.551	106.603	104.799	103.896	126.73	123.595	123.88	252.417	220.167	215.25	185.308	195.727	183.333	222.653	215.231	205.184	219.917	234.769	202.75	196.818	137.902	136.003	135.063
104.402	101.16	105.34	106.324	104.608	104.689	128.603	120.763	124.885	244.583	222.917	216.917	195.083	193.231	183.385	220.84	214	200.66	214.846	222.75	197.667	206.5	138.089	137.028	135.051
103.728	102.343	103.663	105.829	105.845	104.991	128.539	120.631	123.881	238.154	216.154	227.417	191.182	185.545	189.364	225.918	216.788	212.688	209.167	227.385	192.583	196.917	140.051	137.604	132.994
105.994	101.307	104.736	105.288	105.339	104.207	128.652	122.628	125.308	236.25	217.417	232.583	188.583	196.583	185.5	215.08	220.096	214.854	222.083	239.7	206.667	204	139.958	135.984	135.224
103.475	104.106	103.647	107.834	104.86	104.994	126.259	122.011	122.324	229.333	222.833	219.667	195.6	183.538	172.385	227.857	213.385	205.5	213.923	234.727	196.167	195.917	139.196	138.215	133.285
103.369	102.451	104.057	103.897	105.633	105.003	128.022	122.346	124.206	238.917	233.833	209	182.769	184.538	171.286	218.041	214.058	206.76	202.333	218.846	195.538	209.5	139.34	136.44	134.263
101.661	102.965	104.355	105.319	105.356	105.161	128.107	121.429	124.33	242.25	212.25	216.5	189.5	185.545	189.333	224.521	214.019	205.16	217.333	221.75	198.417	204.083	140.462	138.383	135.127
103.489	104.31	103.738	104.697	104.503	104.364	127.483	123.063	125.75	241.917	217.5	226.833	202.818	199.818	174.333	226.64	216.385	204.292	213.25	220.333	203.692	202.75	140.276	134.956	136.566
104.389	101.937	104.404	106.273	104.459	104.423	126.839	120.728	124.436	240.75	231.25	216.308	186.692	180.308	183.917	218.938	220.462	207.12	217	212.167	203.75	213.417	140.241	137.165	133.474
103.516	102.349	102.517	105.07	106.399	103.453	128.46	122.523	124.489	246.667	223.833	219.417	185.154	179.643	206.182	211.48	221.5	203.167	206.077	221.462	202.636	217.636	138.625	139.603	134.31
104.256	104.194	104.117	103.651	104.891	104.748	126.358	120.409	124.453	244.308	217.083	223.583	203.083	190.583	181.545	211.51	221.462	206.7	204.571	222.333	196.615	204.833	139.899	137.908	133.545
103.401	101.365	104.845	103.269	104.099	105.073	127.601	122.546	124.852	237.917	219.75	217	199.364	173.769	185.462	218.042	215.481	213.26	215.083	219	197.667	211.909	139.737	139.645	133.894
103.399	103.038	103.451	105.401	105.159	102.62	125.759	122.707	123.254	232.833	226.333	223.417	200.182	181.182	181.167	222.5	217.404	201.36	218.333	206.5	203.583	210.091	141.543	138.721	132.506
103.962	101.792	104.344	104.939	105	105.785	126.725	122.463	124.383	238	222.917	234.833	203.083	174.714	185.917	215.306	214.577	211.125	206	219	201.583	210.462	139.117	136.843	134.877
102.556	102.776	104.098	104.234	104.359	104.213	126.636	123.526	123.28	231.25	219.667	214.25	205.75	202	176.385	224.8	221.367	206.46	208.333	213.583	207.364	200.846	139.883	135.225	133.029
104.173	103.151	103.553	104.525	103.77	104.346	128.097	121.608	123.198	229.308	221.917	218.75	199.5	185.182	166.714	224.4	206.981	207.72	211.75	212.833	201.667	210	139.746	137.962	135.089
104.508	102.543	104.264	106.082	104.288	105.472	126.645	121.811	124.7	253.1	208.154	213.385	203.333	192.25	190.2	216.755	220	201.78	212.154	230.583	192.75	207.417	138.111	139.254	134.987
103.297	103.029	104.385	105.16	105.06	104.442	127.827	123.625	123.366	233.75	226.818	216.75	202.083	194	183.429	231.08	215.442	203.86	219.636	213.417	203.417	199.667	140.557	138.606	133.968
102.375	102.006	104.552	105.625	103.101	103.245	126.996	122.157	124.409	229	228.333	222.417	203.3	184.25	193.818	221.469	215.192	206.76	204.571	226.923	195.308	203.167	141.377	137.369	135.076
103.325	102.685	102.647	104.182	106.023	103.909	129.368	122.778	125.338	233	220.917	237.6	210	187.455	187.455	219.16	215.846	207.08	222.667	219.923	209.75	222.909	138.235	139.936	132.646
103.106	101.256	102.978	105.234	105.403	105.402	127.265	121.982	125.073	234.417	217	211	211.25	179	191.727	217.755	218.923	203.058	204.846	211.692	204.273	206.75	140.156	136.432	134.054
102.975	101.972	102.199	104.846	104.775	104.481	125.878	123.335	124.5	228.25	218.25	231.083	206.462	177.538	192.5	215.75	216.122	203.596	218.333	209.214	208.818	207.846	140.747	136.052	132.687
104.358	102.968	104.322	104.754	104.016	105.872	129.551	121.832	124.966	239.5	224.667	218.833	200.636	197.727	187	224.667	213.846	208.2	220.769	222.615	188.214	203.417	138.565	137.13	133.408
103.013	102.921	104.35	105.298	105.385	102.918	128.425	121.808	125.018	247.333	226.917	206.083	208.538	196.909	179.333	215.327	220.346	209.22	230.583	225.333	195.167	207.083	139.994	137.082	135.019
105.035	103.17	102.984	104.032	104.617	104.665	128.8	122.084	124.777	242.75	209.692	205.333	189.25	179.167	193.333	229.36	218.041	199.86	227.833	219.714	198.545	202.769	141.459	137.51	132.099
104.943	101.243	102.562	104.641	105.421	104.527	127.039	121.508	126.687	239.385	226.833	226.846	214.182	194.25	178.455	225.939	213.769	207.942	220	202.615	203.75	196.692	139.798	137.987	131.763
103.807	102.545	103.171	103.692	106.286	104.635	128.843	121.667	125.242	231.75	231.833	219.692	195.583	178.071	193.455	222.812	218.077	202.269	226.583	224.333	198.714	203.667	140.514	139.196	134.528
104.205	104.609	103.933	103.971	105.329	105.489	127.745	123.235	125.196	246.385	233.167	222.5	199	191.083	177.615	214.6	217.058	208.88	217.462	217.083	201.923	201.923	141.057	137.565	132.394
103.435	101.406	103.834	103.662	105.448	104.808	127.98	123.545	125.119	245.75	231.083	210.667	204.417	175.308	189.3	218.72	220.365	207.442	215.909	218.583	220.364	203.833	140.116	137.981	133.239
104.055	101.486	104.777	106.067	104.913	102.834	129.227	122.218	124.227	229.917	213.846	236.8	202.25	182.846	186.923	214.417	214.731	202.769	222.462	209.5	215.727	188.333	142.295	136.987	134.308
103.952	104.835	103.682	105.028	106.032	106.006	127.412	121.958	124.658	236	229	211.167	203.667	175.571	188.25	223	215.288	207.06	229.308	207.308	204.333	197.083	140.221	137.5	132.603
102.013	101.837	103.147	104.987	104.475	105.513	129.707	121.313	124.927	240.583	224.5	213.308	189.417	185	188.25	218.1	224.692	205.404	211.857	201.071	213.667	194.769	140.382	138.933	134.165
103.222	102.987	103.53	104.556	104.953	104.041	128.434	123.621	125.923	247.25	220.667	225.538	202.583	190.667	191.182	223.208	212.692	203.942	216.667	210.667	206	194.769	140.803	136.776	135.551
102.527	103.535	105.246	106.041	104.416	104.45	128.423	123.408	124.687	235.75	225.615	212	209.091	187.462	186.667	219.7	215.904	206.212	216.333	218.231	195.429	192.143	137.873	137.442	134.614
104.139	103.888	102.874	103.097	106.016	104.545	128.686	122.442	124.87	239.917	215.154	209.769	197.833	199.083	178.286	215.184	213.918	206.58	207.308	216.667	204.417	198.417	139.502	136.767	134.483
102.886	102.251	106.35	105.297	104.827	105.532	129.042	122.009	125.04	250.417	222.083	218.333	184.636	177.667	185.3	214.939	213.959	210.125	220	207.333	206.545	196	138.196	140.172	132.481
103.366	101.297	104.006	106.303	104.824	105.239	128.332	122.627	125.878	236.538	240.833	220.154	206.833	176	171.417	222.38	218.5	218.396	229.667	218.333	207.364	189.769	139.606	138.763	133.282
102.652	102.468	104.366	105.233	104.981	104.71	128.532	121.712	124.221	239.667	210.083	217.538	198.636	184.308	178.5	221.729	217.878	205.962	209.923	210.25	216.333	194.231	139.348	137.851	137.079
102.516	102.171	104.395	106.165	105.3	104.265	129.508	123.247	124.865	239.583	230.583	212.917	200.5	189.583	175.308	221.041	214.688	205.327	219.917	216.071	212.333	199.308	138.516	138.47	134.225
103.433	102.91	104.394	103.914	105.679	105.141	130.073	122.804	125.04	240.417	231.167	211	202.167	181.571	173	223.08	220.333	202.404	233.5	218.833	206.5	189	138.4	137.953	134.044
101.92	102.837	103.744	105.184	103.633	103.868	127.707	123.022	125.4	232.75	225.077	212.667	198.182	198.455	188.667	217.857	221.306	211.4	210.462	212.583	218.091	195.667	139.554	139.003	133.294
102.53	102.56	103.688	106.294	105.319	105.019	128.378	121.069	124.687	236.462	221.917	210.308	207.75	176.231	185.545	218.347	218.077	204.635	205.857	213.727	213.417	196	139.146	138.785	134.968
101.864	101.46	103.849	106.91	105.696	103.949	128.626	121.383	124.362	239.385	225.455	219.923	202.333	177	192.917	218.449	216.429	208.771	206.714	216.571	211.75	190.333	140.283	137.676	133.616
104.509	100.259	101.826	105.045	104.894	105.27	128.962	120.714	124.576	247.769	219.75	224.25	188	189.917	189	218.449	216.788	213.327	229.636	214.333	215.5	201.077	140.838	137.244	132.316
103.607	103.388	103.137	105.412	105.404	105.702	128.601	122.703	124.757	239.308	231	214.25	192.333	187.5	186.167	222.58	217.712	211.08	234.667	221.083	206.364	202.083	139.822	139.036	133.448
102.43	101.908	103.94	104.779	105.026	104.151	128.494	122.037	124.683	237.333	215.846	215.833	197.417	184.429	194.091	222.878	221.019	203.942	226.083	223.154	204	198.727	139.094	137.653	133.171
103.355	102.327	103.836	106.25	106.338	105.282	127.85	122.077	124.029	247.583	216.846	214.083	198.7	194.727	184.154	220.66	222.458	198.481	218.167	219.583	205.417	200.75	139.821	137.403	132.108
103.972	103.755	103.385	105.519	104.591	104.894	128.969	122.773	123.921	235.231	222.667	219.75	189	179.286	193.636	210.577	226.981	204.558	228.769	231.5	205	206.091	142.347	139.161	133.812
103.266	103.33	106.843	104.855	105.907	103.939	128.969	120.181	124.624	246.083	223	210.615	200.417	172.929	177.091	215.269	214.673	209.24	214.077	209.462	208.583	199.455	139.711	140.733	136.527
104.747	102.168	102.902	106.228	104.826	105.286	127.686	121.157	123.722	225.385	220.75	217.167	191.9	179.615	188.833	217.286	226.385	205.538	220	227.5	203.75	190.769	139.1	137.51	134.36
103.374	103.674	104.221	105.263	105.272	104.186	128.199	122.152	125.61	231.538	224.417	223.833	202.455	186.273	174.429	215.558	215.438	208	229.727	225.417	216.583	200.182	139.345	139.584	134.198
104.275	102.041	104.826	106.584	105.852	105.987	128.65	120.978	125.438	236.154	227.25	216.083	190.167	183.154	172.077	212.571	224.981	203.115	217.75	209.231	201.333	206	137.629	139.188	134.054
103.709	101.93	104.659	104.423	105.413	106.172	127.186	120.792	125.719	246.833	233.333		205	185	176.091	229.184	222.857	203.038	224.286	211.154	210.333	201.182	140.283	139.769	134.804
103.375	102.047	103.051	104.994	105.545	104.492	127.958	121.958	124.978	239	227.333		187.462	185.636	172.083	213.837	225.449	212.875	224.154	206.769	214.429	204.25	140.784	139.861	135.253
101.911	103.67	105.437	103.984	104.601	103.981	128.647	121.837	122.466	240.833	224.583		191.25	190.1	180.846	214.796	217.531	204.019	220.769	219.417	211.667	202.818	143.604	139.162	134.562
101.911	103.327	103.073	104.577	106.644	104.871	127.774	121.989	123.958	232.083	230.417		200.455	197.727	182.286	222.54	224.788	199.115	220.308	235.833	213.417	194.917	139.997	139.473	134.096
103.035	101.761	102.719	105.042	105.085	104.435	128.253	122.759	124.989	239.75	225.167		207.636	179.8	185.818	218.224	215.692	203.58	221.231	223.9	191.5	208.727	137.683	140.759	134.574
102.41	103.728	104.135	105.312	105.342	104.886	127.47	121.066	124.124	242.923	208.923		200.5	200.909	181.846	220.612	222.347	205.74	209.455	226.2	216.636	207.182	139.232	138.156	132.876
102.661	100.796	105.892	104.522	103.671	105.123	127.75	121.261	124.549	242	209.538		204.333	191.75	171.231	227.417	221.442	196.404	221.231	219.231	197.667	204.917	138.565	140.458	133.813
104.114	102.708	104.875	105.548	105.117	105.977	130.195	121.856	123.133	236.083	228.167		201.091	193.5	180	211.115	227.245	210.729	227.143	213.5	199.167	200.583	141.029	140.821	134.665
103.032	103.432	102.713	105.524	106.821	105.593	128.746	122.406	124.232	240.308	214.917		199.667	196.182	176.846	216.388	222.163	211.292	216.636	211.154	198.083	209.182	137.8	140.506	135.196
103.562	102.218	104.061	105.626	105.136	105.937	128.537	121.9	125.546	235.308	228.667		203.091	190.75	190.75	216.904	221.98	205.208	215.667	214.692	211.75	203.769	139.62	140.477	135.218
103.307	101.753	102.904	105.165	105.16	105.965	129.078	121.392	124.896	257.5	212.25		201.636	181.833	177.538	213.5	219.327	212.388	224.308	215.923	206.5	205.364	140.093	138.88	134.069
104.713	102.529	102.949	104.596	105.881	104.571	127.626	123.182	125.58	236	225.308		207.727	180.308	186.364	218.577	228.735	205.646	236.25	214.692	205	193.615	140.26	139.349	133.136
101.351	102.627	103.593	104.572	103.687	106.476	128.139	122.596	124.907	255	229.583		198.909	185.083	192.417	221.36	224.245	198.538	210.308	227.7	206.583	199.083	139.342	138.956	132.855
102.858	103.208	102.467	103.784	103.029	107.494	127.084	122.896	124.626	232.417	226.917		194.417	178.615	189.455	220.56	223.122	210.78	220.923	214.182	212.75	191.923	139.852	137.81	134.54
103.178	103.212	103.854	104.221	104.997	106.876	129.662	122.221	125.861	233.083	228.75		203.545	188.083	178.538	220.771	213.36	212.92	227.2	204.25	220.333	194.167	140.819	138.216	133.076
103.379	102.955	104.939	106.023	104.893	103.754	129.993	121.896	125.741	248.417	218.833		201.5	191	188.25	219.612	213.755	206.125	236.9	231.5	198.583	196.636	139.562	136.702	134.364
103.633	102.647	104.562	107.83	105.111	105.399	129.679	121.35	125.773	261.583	220.167		193.154	189.545	179.308	219.808	212.9	210.208	217	210.385	209.833	205.455	139.987	136.34	135.554
103.692	102.965	103.799	104.195	104.808	105.785	129.033	122.891	125.651	237.333	215.462		200.417	180.538	187.417	224.188	220.104	217.78	228.417	214.545	197.714	201.615	139.877	137.006	133.3
102.029	104.253	103.363	105.102	104.34	106.649	129.031	121.771	125.042	249.833	226.833		204.75	182.667	179.083	224.878	218.265	206.125	238.091	237.2	209.333	199	141.438	137.421	134.812
103.377	103.577	103.714	104.698	104.772	105.401	128.584	120.767	125.049	256	223		178.154	182.846	189.462	218.673	228.122	211.22	217	205.5	205.75	209.818	139.894	137.166	135.079
103.915	102.022	105.443	104.769	104.374	106.813	128.535	120.883	124.954	248.25	221.667		191.833	181.583	188.5	220	213.667	211.75	210.769	205.538	221.727	198.5	140.471	138.603	133.93
103.846	102.462	104.086	104.468	105.603	104.064	130.666	120.828	125.009	227.583	227.75		208.545	184.818	172.077	214.481	222.612	201.48	213.692	212.923	215.417	204.917	138.964	138.247	136.389
103.483	102.173	103.128	106.022	104.796	105.282	127.645	119.814	126.057	246.769	230.25		193.455	175.167	182.9	213.538	218.429	208.44	246.9	215.5	213.583	205.818	141.295	138.94	134.538
103.265	103.208	103.882	105.535	104.651	105.342	129.033	120.747	125.586	238	229.455		189.769	182.727	185.818	218.904	222.469	207.56	237.833	215.769	219.917	204.273	141.892	136.756	135.615
102.679	103.525	104.054	106.324	105.994	106.524	128.858	121.508	124.645	267.7	231.25		202.364	185.846	180.643	220.94	220.327	214.6	221.385	222.308	214.727	214.364	140.984	138.006	134.804
103.07	101.09	103.764	104.739	104.984	104.886	128.894	121.757	125.313	245.917	226.538		195.909	189.75	194.417	217.212	212.417	203.06	233.538	206.5	207.909	205.167	139.561	139.208	134.914
103.724	102.603	103.177	105.508	105.994	106.459	127.336	120.533	124.85	233.462	226.917		203.833	189	178.692	223.347	218.52	205.02	221.462	202.462	210.75	207.091	140.546	137.065	135.086
104.253	101.696	103.71	102.981	103.971	104.842	127.582	121.257	124.839	254.167	226.308		206.833	196.545	184.909	221.308	217.462	211.02	242	207.167	215.75	198.462	140.381	139.841	135.974
103.7	102.386	103.423	106.159	105.617	105.564	127.357	122.318	124.565	246.083	215.25		208.909	189.667	194.667	218.481	220.612	205.3	221.231	218.25	226.583	210.538	139.237	138.873	134.556
102.746	102.487	104.577	105.728	105.772	106.229	129.313	121.055	124.33	244.75	223.462		200.091	196.364	185.333	218.14	220.5	203.72	230.769	222.417	212.857	211.545	140.465	138.854	135.481
104.758	101.322	104.188	104.997	104.929	105.725	129.852	120.206	124.361	234.308	228.083		191.167	193.667	182.308	229.653	226.75	205.64	229.917	217.25	210	216.909	141.902	140.159	134.215
104.784	102.51	103.457	105.344	103.904	106.675	128.128	121.724	124.839	243.25	224.75		200.833	182.917	178.769	222.5	224.449	205.154	222.333	198.917	201.917	205.273	141.035	137.524	133.823
103.506	102.719	103.521	104.35	105.288	106.424	126.314	120.464	124.357	232.308	221.917		200.75	198.364	174.083	220.038	220.896	206.86	225.5	199.786	205.5	206	141.516	138.911	133.975
104.837	101.7	102.854	104.151	104.063	104.552	128.772	120.383	123.63	238.5	222.25		186	192.8	188.167	225.98	218.458	208.62	216.417	214.917	200.5	214	138.841	138.035	136.816
104.609	102.58	103.379	105.06	103.932	105.959	126.841	122.284	123.596	239.692	226.917		198.417	180.667	191.545	230.673	217.583	203.865	221.25	209.692	209.231	200.091	139.484	137.408	133.641
103.297	100.782	102.713	104.206	107.11	105.561	129.278	120.476	123.759	238.083	225.385		194.182	187.25	190.333	231.583	218.75	195.692	216.909	213.083	211.25	204.182	141.337	139.13	134.353
102.284	104	103.425	104.079	104.577	106.123	128.426	120.867	124.22	228.667	234.833		204.5	190.833	182.909	217.481	221.082	206.1	236.6	223.167	214.636	207.545	141.163	136.987	133.545
104.215	100.167	103.981	103.437	103.927	105.242	128.888	121.206	123.958	236.833	243.5		198.333	189.333	184.833	225.102	212.5	210.36	228.167	215.083	213.5	191.154	141.568	138.815	136.117
104.019	101.121	104.1	103.708	104.195	106.153	127.743	120.603	122.772	235.333	225		197.083	193.833	180.154	218.038	214.714	210.14	216.692	212.667	211.455	203.25	140.293	139.545	134.288
103.505	102.379	104.711	103.122	106.075	106.535	129.978	120.442	124.405	256.417	220.25		199.727	179.083	175.231	225.827	210.94	203.288	209.154	204.167	207.273	198.273	140.035	139.344	134.997
103.676	103.268	103.984	105.399	105.776	106.032	128.291	119.729	124.031	237.667	226.167		186.25	187.5	185.583	225.46	221.143	200.5	208.583	217.077	205.636	203.083	139.829	139.938	134.098
102.413	103.266	103.88	104.975	105.615	105.6	127.714	122.1	124.612	242.667	220.077		200.083	201.545	178.846	217.115	210.64	206.18	223.091	211.769	209.818	198.091	139.847	138.467	132.598
102.585	102.502	101.549	104.312	105.929	106.419	127.521	121.692	124.527	240.077	222.462		192.417	180.083	180.667	228.208	215	201.66	229.7	216.083	194.357	198.167	137.612	138.408	133.434
103.737	102.538	104.674	103.939	106.282	107.136	128.341	121.716	125.248	233.583	221.231		192.077	192.417	189	217.058	219.714	206.66	212.917	203.692	201.545	204.308	139.143	137.248	135.301
103.228	101.537	102.326	105.212	105.078	105.799	128.676	120.664	125.675	251.083	222.75		202.636	191.909	184	222.635	218.923	200.62	208.462	215.083	213	216.636	138.445	138.522	134.987
105.323	101.907	103.931	103.678	103.669	105.755	127.785	120.582	125.197	243.25	220.182		203.364	193.583	174.769	219.635	221.224	205.12	226.3	208.083	233.4	209.5	138.987	138.804	133.361
103.84	102.473	103.849	107.274	105.067	106.071	128.759	122.743	124.211	250.333	216.077		190.077	197.364	179.385	228.633	223.143	204.865	216.077	217.167	201.25	212.273	140.24	138.268	134.054
104.579	101.646	102.631	105.539	104.052	105.256	129.075	121.148	124.313	237.385	224.636		195.538	182.25	177.538	217.5	214.49	200.269	232.9	211.583	205.182	207.818	139.929	138.276	134.946
103.383	102.307	102.829	103.99	105.142	103.837	127.097	121.277	124.387	236.923	232		199.818	200.154	177.9	214.846	213.646	199.94	211.769	218.583	205.5	212.091	137.555	138.465	135.405
103.363	102.628	102.161	104.304	103.542	108.604	127.304	121.892	122.792	248.333	227.333		198.636	184.25	186.385	214.904	215.776	203.827	214.417	209.833	203	197.417	141.74	137.38	134.098
105.121	101.467	103.53	104.872	104.479	104.644	128.878	122.038	123.402	230.538	217.818		193.545	178.143	189.583	222.959	215.125	202.077	220.769	218.5	201.636	200.455	139.441	138.184	136.513
103.535	102.142	103.284	105.159	104.025	105.135	128.055	122.202	123.011	236.692	225.833		188.636	184.25	189.083	218.712	217.98	204.98	207.769	215.846	210.333	226.4	139.013	139.62	134.291
103.226	102.128	102.88	103.449	105.536	105.657	128.184	120.311	124.347	242.077	206.615		188.385	176.538	186.455	218.286	220.104	203.52	230.083	216.333	210.091	215.364	140.695	137.617	135.547
102.506	102.498	102.394	104.135	103.354	105.826	128.168	120.844	122.356	242.917	223.818		189.667	196.818	189.455	222.769	217.347	201.846	216.333	202.333	207.917	194.182	139.367	137.641	134.351
103.351	102.095	104.058	106.048	105.365	104.801	128.304	122.097	123.079	230.833	215.917		205.182	186.4	173.786	210.865	218.531	206.54	219.667	218.417	209.154	192.667	140.317	137.743	133.968
103.655	103.92	104.205	104.641	105.367	106.407	128.24	121.664	124.122	248.75	229		195.692	191.167	184	223.082	218.224	206.808	216.083	210.154	214.167	199.25	140.394	136.192	134.275
105.513	102.591	102.551	104.673	103.896	106.34	127.799	120.869	123.347	244.25	215.667		188.538	178.077	187	222.481	223.083	207	212.615	208.5	208.75	202.909	139.403	138.54	134.386
103.089	103.926	103.221	104.141	104.763	105.139	127.362	121.362	123.231	244.417	217.538		199.167	190.5	184.667	220.077	219.729	204.481	213.167	206.083	208.833	206	140.392	136.14	134.727
104.399	103.586	102.738	104.006	105.16	106.724	128.581	122.723	123.406	255.417	215.308		189.077	183.273	198.182	220.808	219.229	202.788	214.667	215.583	204.923	195.833	140.448	137.568	134.848
103.571	102.433	103.038	105.433	103.949	103.956	129.197	122.213	123.766	253.083	210.75		194.545	190.917	194.727	217.115	225.367	200.788	221.25	202	215.4	207.25	140.31	137	134.15
105.118	102.449	103.632	104.946	104.568	105.853	129.595	121.336	123.182	244.333	215.923		200.083	193.25	187.7	212.904	206.769	204.538	214	217.25	195.583	184.385	138.946	138.228	133.753
103.385	102.858	103.726	105.387	105.109	106.022	129.706	122.446	123.058	247.333	215.917		197.833	183.538	188.917	222.596	211.208	204.06	219.25	200.167	201.231	212.091	140.759	137.834	134.705
103.351	102.606	104.006	104.939	104.198	105.641	129.594	122.825	122.485	254.25	209.462		195	190.273	176.462	219.5	225.271	198.192	211.75	208.538	202.667	193.583	140.883	136.057	135.392
103.355	103.561	103.475	104.9	105.721	105.717	128.998	122.356	122.093	244.417	229		196.5	184.333	185.182	220.192	225.673	200.942	231.538	198.25	214.833	195.167	139.99	136.447	134.646
104.082	102.862	102.811	103.429	104.394	104.739	129.96	122.384	123.469	240.417	223.5		198.167	179.154	188.818	226.75	222.714	207.635	212.923	222	209.75	196.583	140.924	138.208	133.75
103.458	103.561	102.227	104.539	105.446	107.717	130.191	123	122.286	244.167	218		186.769	183	173.462	222.538	217.521	199.192	217.417	219.545	202.583	175.615	141.346	137.308	133.858
103.307	103.641	103.271	104.408	104.416	106.064	130.115	122.35	123.302	246.25	218.333		198.333	191.364	184.333	216.808	216.25	201.692	218.154	237.1	196.692	190.286	140.124	137.176	134.032
102.943	102.388	102.727	103.872	104.442	106.778	129.149	122.392	122.996	240.75	236.5		188.077	178	174.462	215.481	209.143	197.481	215.417	202.077	209.769	205.455	140.667	137.371	133.389
103.267	101.88	102.361	105.581	105.487	105.208	129.425	123.878	122.429	241.5	216.692		198.231	189.917	184.636	226.24	220.816	201.212	211.846	227.818	194.917	201.769	137.181	137.179	133.016
105.047	103.556	105.526	105.074	104.3	105.731	128.062	122.295	122.841	243.833	232.667		203.917	187.364	177.231	223.077	222.245	205.962	209.923	236.3	195.333	201.385	140.119	136.689	132.873
104.611	102.136	104.281	104.615	104.003	105.256	129.907	122.554	121.427	237.75	218.667		202.545	194.091	171.182	221.058	213.25	201.885	218.769	204.692	205.25	196.333	139.705	137.59	135.263
105.045	101.701	103.318	104.503	104.718	106.355	128.889	122.188	122.538	254.5	219.167		191.923	184.5	172.923	222.019	214.917	201.26	219.692	197.714	202	193.231	139.073	138.327	133.292
104.19	102.923	104.08	104.073	104.747	105.56	129.187	122.035	121.414	256.167	219.083		202.273	186.583	195.364	213.154	220.592	198.442	224.333	219.545	200.167	195.455	141.399	138.256	134.467
102.429	101.615	104.642	105.613	104.78	105.364	127.642	122.002	123.354	245.083	220.417		201.833	187.364	166.385	221.654	217.857	196.538	219.077	211.833	208.833	192.727	139.44	137.872	134.535
103.032	102.356	103.079	104.556	104.351	107.093	129.249	123.073	120.938	245.667	212.923		193.769	178.538	176.154	213.75	215.306	198.154	219.667	215.75	199.077	199.769	139.829	139.439	134.105
103.765	101.626	102.732	104.25	105.383	106.89	129.452	123.322	122.732	242	216.833		202.167	191.083	178	217.385	220.208	202.981	237.3	213.364	202.25	198.75	139.368	137.984	133.057
103.044	102.394	102.697	103.415	103.845	107.708	128.894	121.883	121.524	254	228.091		197.923	192.091	183.5	219.942	224.327	197.673	217	227.2	213.75	198.077	140.064	137.538	134.708
104.196	102.074	104.215	103.899	104.187	105.772	128.482	121.446	123.489	235.333	219.083		187.077	190.333	181.308	218.66	220.673	201.019	213	221.75	198.167	210.154	140.625	138	132.449
102.997	101.394	102.587	104.197	104.692	105.41	129.301	122.244	123.35	238	225.833		202.818	175.692	184.818	214.846	218.396	198.308	219.308	202	203.5	204.615	138.808	138.013	134.301
102.009	102.08	103.091	103.942	104.943	104.984	127.376	121.457	124.155	236.583	212		200.182	182.833	174.308	219.245	214.633	197.538	218.417	206.583	205.583	191.417	138.196	136.904	134.826
104.808	104.064	102.732	104.413	104.958	106.093	129.433	122.383	122.606	234.333	227		189.538	193.9	179.692	222.18	220.857	199.942	224	213.727	210.75	208	139.07	139.094	133.557
103.104	102.427	103.281	104.256	106.312	107.293	127.248	122.368	122.126	236	222.083		200.545	192.667	176.818	216.538	218.229	194.981	209.154	212.846	192.333	196.167	140.894	138.025	131.915
102.29	104.628	104.665	103.45	105.923	106.608	129.471	122.721	123.493	238	210.417		186.308	171.769	174.538	222.837	215.06	201.74	218.308	217.273	210.667	200.636	139.917	138.301	131.839
102.14	103.01	103.489	103.708	104.438	108.196	128.192	123.14	123.244	215.167	236.833		197.833	186	174.308	217.75	220.292	192	210.667	208.692	211.636	192.571	139.578	138.776	133.199
103.899	102.574	103.579	107.032	105.452	104.67	129.563	122.526	123.332	254.417	218.167		206.231	180.769	192.455	226.16	220.042	201.28	217.818	202	196.417	197.25	140.867	138.467	133.123
102.91	102.878	104.129	104.359	104.141	105.086	128.128	123.21	121.946	250.167	219.333		200.5	194.636	176.2	224.2	220.75	196.75	208.083	204.077	201.615	193.385	140.552	136.598	133.022
103.712	102.673	105.331	105.789	105.405	103.861	127.805	124.099	123.587	232.417	221.25		201.667	185.846	182.364	221.423	217.939	197.308	201.308	211.167	198.333	205	138.241	137.955	133.161
103.776	102.557	102.83	105.252	105.513	106.38	127.775	121.814	124.221	239.167	216.923		193.167	192.545	183.154	220.612	216.592	197.5	204.077	210.583	192.571	190.5	141.478	138.26	132.684
103.529	102.728	103.521	105.022	106.43	107.195	129.662	123.603	122.763	246.5	213		197.333	180.769	182.917	225.74	214.408	195.462	206.833	203.917	187.5	198.417	138.471	139.702	135.551
103.196	103.096	102.028	105.672	104.295	105.526	127.659	122.291	122.593	251.75	219.077		196.583	186.615	180.25	220.857	216.875	198.558	213	195.615	213.636	201.083	140.419	136.949	133.652
103.47	101.494	104.169	106.84	104.158	104.092	127.468	122.357	123.468	228.083	224.417		200.833	185.273	184.083	220.583	220.604	200.7	203.727	216.667	210.364	199.769	139.33	138.188	133.743
103.616	102.124	104.397	105.256	106.179	107.319	127.973	123.182	121.987	250.583	213		203.25	188.167	189.727	219.755	219.796	205.104	222.75	224.917	202.833	208.182	140.003	139.724	134.877
102.883	102.234	103.393	103.445	104.117	106.649	129.328	123.527	122.946	257.8	215.833		192.083	176.538	188.917	223.625	218.061	192.365	216.462	210.25	203.417	203.917	139.416	137.179	133.256
103.278	102.627	102.388	104.771	105.585	105.811	128.867	124.462	121.617	256.167	217.417		198.5	182.308	173.714	227.14	216.188	198.135	201.615	196.583	201.417	187	137.654	140.112	134.282
103.665	102.112	104.306	104.651	106.163	106.224	128.783	123.524	121.857	256.417	225.333		193.083	196.455	180.333	221.833	215.714	192.462	228	206.333	207.167	192.857	140.25	137.571	131.095
103.424	101.471	104.3	105.656	103.965	104.209	128.546	122.907	122.945	236.385	210.75		205.182	178.154	171.231	219.571	216.125	196.94	219.917	216.692	212.385	193.5	141.254	138.715	132.962
102.671	102.542	104.127	104.439	105.462	106.693	131.226	122.392	122.757	244	223.833		200.833	180.714	174.917	213.76	210.14	202.94	217.75	216.417	203.091	202.923	140.61	137.247	134.514
104.311	102.435	105.123	104.541	104.689	106.267	129.365	123.868	122.218	240.417	212.385		193.071	192.364	166	223.958	225.837	205.438	221.25	209.231	193.462	194.917	138.788	140.617	135.668
104.237	102.397	102.341	104.341	104.458	105.978	129.7	124.044	121.111	237.667	215.667		200.455	185.538	182.182	218.92	209.388	196.3	222.909	227.9	206.154	201.083	138.731	137.76	132.81
103.527	103.529	104.298	104.68	104.433	108.261	127.861	123.333	122.644	242.692	224.833		194.5	181.538	178.615	214.735	214.833	197.66	212	219.25	191.615	203	139.521	138.669	135.577
104.861	102.532	103.59	104.814	105.581	106.92	129.279	122.647	121.671	266.1	213.583		198.5	192	173.846	220.939	208.538	189.712	210.692	220.846	191.462	180.615	139.453	135.968	134.162
102.5	103.118	103.726	106.174	105.17	104.915	130.161	123.428	122.643	237.583	232.333		191.167	189.5	178.833	210.077	207.462	191.308	231.833	216.167	206.5	207	138.703	137.378	133.05
104.013	103.035	103.562	103.987	103.348	107.444	127.389	123.902	122.856	226.846	223.5		194.75	178.308	178	220.188	213.16	191.019	216.692	211.846	188.929	197.167	137.955	137.505	134.063
102.236	102.373	103.814	105.794	105.797	107.821	128.576	121.27	123.712	251	236.417		196.583	191.727	177.455	222.542	226.143	196.077	210.818	208.643	192.357	192.417	139.981	138.594	134.282
101.475	102.846	102.804	105.678	103.475	105.718	128.881	122.363	121.799	235	242.545		202.273	185.692	187	218.2	211.288	196.827	220.167	220.462	201.636	205.5	138.656	136.426	134.101
103.013	101.643	104.66	106.305	102.396	105.152	128.535	122.892	123.254	244.083	232		196.75	182.75	186.615	223.041	217.551	196.115	218.417	219.455	203.417	202.538	138.082	136.577	134.845
103.138	101.695	102.795	104.562	104.467	106.658	127.19	124.108	122.647	253.833	227		200.1	196.417	163.615	217.531	206.615	187.75	210	213.917	193.083	187.538	140.806	137.407	135.506
103.101	102.159	103.646	104.716	104.462	105.397	128.247	122.686	123.829	240.583	232.583		199.083	197.636	167.929	221.551	214.857	201.32	193.273	220.385	209.167	205.714	137.848	138.285	134.505
103.009	103.696	104.281	104.318	104.554	105.879	126.642	123.322	121.83	253.25	227.75		189.083	187.091	184.25	224.188	215.688	193.75	207.308	208.385	212.909	188.857	138.942	138.787	134.949
100.917	102.252	103.796	106.333	106.321	104.119	128.252	122.608	122.409	250.077	234.909		197.917	196.818	180.385	218.918	216.792	199.94	208	207.583	200	204.75	140.061	139.098	134.158
102.333	102.07	103.514	105.151	104.047	106.081	127.795	123.24	122.925	244.846	225.462		178	181.538	183	215.269	208.904	195.38	209.167	215.385	205	208.75	139.282	137.359	134.825
104.535	101.946	103.904	104.323	104.825	107.181	128.024	124.707	122.964	247.385	216.5		191.846	194.846	176.727	229.34	226	199.14	215	212.231	202.727	198.143	137.832	138.797	133.881
104.289	103.047	103.946	105.887	104.174	104.123	128.201	121.533	122.524	252.083	234.667		182.692	188.455	178.615	225.408	228.878	201.18	208.583	219.2	197.917	204.462	140.155	139.495	134.631
102.253	102.808	102.558	106.399	104.81	104.196	127.327	124.075	121.555	244.846	228.917		189.364	176.333	183.75	217.212	220.542	197.788	193.923	207.071	200.75	192.769	139.9	137.177	134.457
103.965	103.943	104.054	104.817	105.419	108.373	126.658	121.896	122.414	220.583	226.167		183.538	177.308	182.273	218.115	214.735	199.92	233.667	212.25	199.167	198.538	139.085	138.73	132.782
103.194	101.829	102.785	105.362	104.045	105.137	127.339	120.666	122.296	231.5	230.417		195.909	183.417	182	215.865	219.265	206.792	211.75	211.25	203.5	206.545	139.487	139.174	133.461
104.003	102.907	103.792	103.987	105.317	106.352	126.867	124.184	120.883	239.917	235.5		202.2	189.273	172.231	213.9	218.918	196.46	213	222.083	198.929	198.846	137.638	137.784	134.365
103.582	102.197	104.54	104.237	104.438	104.975	126.969	124.398	122.819	229	236.917		204.273	186.692	187.417	218.5	218.184	194.346	220.615	216	207	204.231	137.538	139.165	131.794
103.009	102.498	104.57	105.927	104.899	106.885	126.732	124.2	122.369	240	229.5		195.909	200.333	177.667	219.837	225.458	204.917	212.846	213.643	206.083	192.308	140.651	138.927	133.219
103.331	102.717	105.106	104.177	107.277	106.858	128.273	123.396	120.396	259	232.385		198.636	186	184.5	211.75	217.041	195.712	220	222.5	197.5	208.364	138.625	138.513	133.516
104.956	102.639	102.356	103.917	103.706	103.59	126.861	121.823	120.729	242.917	238.917		192.583	193.273	184.833	221.98	217.143	204.979	211.5	207	202	193.214	140.301	137.073	133.828
103.429	102.14	104.303	106.408	105.415	106.247	126.461	123.075	120.978	247.75	231.833		201.8	197.5	169.154	215.327	221.481	203.312	200.692	211.692	195.667	215.9	139.946	139.209	134.651
103.76	102.446	103.405	105.594	104.939	104.92	126.298	122.681	123.765	236.167	234.833		198.273	183.083	181.455	208.942	221.673	200.88	208.929	217.923	201.786	198.154	139.326	137.949	134.919
101.933	102.847	103.508	105.804	105.12	108.272	127.389	122.966	120.726	232.5	235.182		190.667	193.75	174.667	220.962	213.904	210.66	223.385	216.333	204.75	199.538	138.766	138.525	133.019
103.044	102.705	103.611	104.821	105.859	107.796	128.474	123.319	122.126	241.333	225.333		182	179.615	177.857	216.596	217.22	207.125	224.833	209	203.667	205.615	139.218	139.244	132.446
103.299	102.032	104.942	105.489	105.155	106.334	128.258	123.623	123.077	248.667	230.25		190.643	197.182	175.143	208.038	226.02	205.396	217.357	209.75	204.917	208.091	139.238	138.557	135.509
102.158	101.756	104.84	105.571	105.117	106.07	129.998	122.381	121.918	232.583	224.538		192.385	198.182	173.333	212.596	212.654	199.76	226.7	215.385	209.929	209.667	139.549	137.929	134.731
102.555	103.245	103.273	105.475	105.839	105.611	126.733	123.177	121.967	251.667	235.083		185.308	182.538	190.333	219	227.646	205.42	209.615	215.385	207.545	212.091	139.089	140.108	133.895
102.299	102.519	103.204	104.425	104.93	104.767	128.793	122.257	121.531	241.833	236		195.615	188.583	175.75	219.077	217.154	197.938	226.6	215.583	205.417	219.083	141.377	138.481	135.434
102.703	101.432	101.865	103.892	105.085	106.526	128.596	122.998	122.374	252.917	229.154		193.727	183.5	183.083	217.135	219.438	204.6	213.929	217.538	197.833	211.833	140.351	140.104	135.25
103.745	101.902	103.618	105.764	105.519	105.965	128.004	122.967	121.931	248.167	231.167		200.364	181.154	176.615	212.654	210.596	205.92	213.75	210.167	200.667	190.615	142.124	138.743	133.484
104.521	103.13	102.646	105.875	104.718	105.821	126.782	122.666	122.898	242.25	212.667		204	176.154	179.5	219.712	223.125	204.84	234.2	215.75	204	193.75	140.878	138.377	133.776
104.099	101.806	103.167	105.571	105.013	107.268	128.434	123.907	122.695	245.5	216.833		194.333	177.692	169.692	215.538	217.423	200.98	206.154	203.727	199.083	197.308	139.698	136.934	132.278
104.066	102.013	102.666	106.072	105.564	107.202	127.316	124.033	123.648	247.75	238.333		201.818	179.846	175.231	217.346	210.615	199.312	202.769	211.083	206.25	204.636	139.451	136.136	132.747
103.927	103.269	104.073	106.276	105.547	106.877	126.555	123.002	123.035	247.75	215.5		191.538	184.154	181.417	214.115	213.5	204.7	217.5	220.9	202.769	201	141.064	138.791	134.361
103.769	101.548	103.161	106.134	105.896	105.83	128.756	123.062	120.562	252.917	220		185	193.818	184.917	217.04	230.327	200.146	235.1	217.75	198.385	182	139.654	137.766	132.665
102.899	102.908	104.061	105.571	105.335	105.962	128.612	123.801	122.281	240	221		188.538	195.636	183.917	215.135	222.208	203.604	211.385	237.5	209.455	215.273	140.924	137.429	132.94
102.787	101.23	102.3	106.346	104.026	106.208	126.91	123.689	123.073	233.846	219.308		195.154	185.083	181	219	221.327	202.396	210.636	211.769	202.083	199.083	140.885	138.648	134.456
103.869	100.651	103.134	103.886	104.354	106.853	127.233	123.235	121.323	228.077	223.077		199.167	178.846	179	212.923	220.479	205.08	221.25	206.538	202.364	192.833	140.913	138.019	134.099
103.639	103.75	103.886	106.114	105.82	106.048	127.445	123.18	121.626	242	219.583		202.364	184.333	176.846	216.731	228.062	199.042	220.308	211.333	210.538	199.077	139.975	139.275	132.342
104.326	100.311	103.196	103.965	104.182	104.849	129.051	122.397	123.142	247.917	218.923		198.231	185.692	180.75	211.019	218.942	199.438	245.1	215.833	205.583	206.667	139.292	137.187	135.538
103.053	99.5637	102.347	104.471	104.126	105.908	127.848	122.576	122.522	250.75	221.154		197.182	200.545	172.833	210.058	216.769	207.771	207.154	209.462	186.462	205.333	139.224	137.238	135.889
103.899	101.657	105.289	105.579	105.472	106.245	127.985	121.872	122.436	244.583	226		196.364	176	186.5	214.654	214.673	203.16	216.364	230.8	193.727	202.583	139.654	137.543	133.117
104.818	101.372	103.554	106.215	105.468	103.641	126.064	121.479	122.611	246.833	215.385		191.923	181.917	179.25	214.692	219.346	206.846	210.923	215.545	207.182	202.5	139.75	138.035	134.259
102.417	101.99	105.128	105.313	105.069	105.637	127.876	123.9	121.338	248	231.538		200.727	185.583	176.667	210.615	218.469	199.68	206.5	209.667	202.667	193.25	138.304	137.724	134.392
103.276	101.516	104.676	103.676	103.936	106.895	127.839	121.923	121.19	251.667	242.2		189.25	191.545	174.923	219.731	220.938	201.02	214	200.833	202.5	203	139.679	138.619	133.206
104.197	101.462	103.139	103.067	105.727	104.222	128.439	122.27	120.973	249.833	221		197	186.615	180.818	215.365	222.755	203.458	213.231	204.5	201.364	205.846	138.849	138.987	134.513
103.65	101.609	102.871	104.497	104.81	106.189	128.929	121.539	121.142	252	225		185.154	188.385	180.308	216.327	225.542	199.708	203.615	213.417	196.692	189.917	138.629	138.225	134.11
103.859	101.841	104.354	105.341	104.899	107.578	126.9	122.223	122.113	251.667	227.5		190.308	182.333	186.923	215.654	217.288	209.36	212.818	211.25	197.538	211.182	139.096	140.908	133.522
102.832	102.475	105.18	104.804	105.575	106.57	126.907	122.197	121.582	237.75	219.75		181.692	187.462	171.083	215.923	221.538	203.82	207.818	209.75	203.636	198.182	138.59	136.838	134.681
102.958	102.391	102.93	104.538	106.51	106.582	127.823	121.723	122.863	256.667	209.308		194.909	175	176.615	225.755	217.388	207.667	207.75	209.5	198.462	213.455	138.784	136.093	133.127
103.724	101.256	103.66	104.103	106.035	105.968	127.609	122.313	121.224	235	221.833		194.385	178.5	179.818	215.25	226.224	202.42	217.538	198.385	196.333	185.846	137.721	136.559	134.744
103.804	101.74	105.085	105.935	105.937	104.726	127.243	121.608	121.577	244.25	231.364		192.846	175.929	178.167	214.04	214.673	205.7	205.615	213.077	207.583	203.727	139.835	137.212	134.329
104.383	102.93	102.648	105.275	106.619	105.136	128.861	122.727	121.924	245	246.2		189.25	173.643	178.615	214.12	215.981	206.68	206.909	217.417	199.583	208.091	138.595	137.589	135.584
104.459	101.737	103.145	103.361	105.25	104.689	128.176	121.384	122.122	251.667	211.455		191.6	183.417	184	219.288	217.49	203.5	205.083	210.462	200.727	191.462	137.994	136.263	133.739
102.079	101.152	103.348	104.66	105.802	106.179	127.639	122.58	121.184	237.583	215.385		200.909	182.667	181.091	216.9	224.388	205.396	204.923	215.583	200.5	204.273	136.981	137.741	133.051
102.278	102.618	102.943	104.295	105.676	104.975	127.763	123.336	122.093	251.583	230.167		183.083	201.182	170.833	211.865	216.469	205.854	207.308	208.692	206.273	198.917	139.5	138.272	134.378
104.623	101.199	102.99	104.562	105.465	105.374	128.117	121.832	121.929	244.667	230.167		179.417	193.5	181.636	217.692	215.653	206.82	210.75	218.909	192.182	209.75	136.984	138.794	134.167
103.24	101.924	103.694	104.164	106.067	106.13	128.351	121.299	122.854	241.5	234.583		197.182	190.333	195.091	216.404	216.173	205.712	239.2	215.583	206.583	204	140.083	136.832	134.104
101.959	102.758	103.569	104.317	106.647	107.222	128.27	122.623	121.355	233.333	234.636		189.917	190.462	176.769	219.42	224.918	206.88	208.833	223.846	202.636	187.308	139.58	137.241	133.627
103.926	101.455	104.067	104.339	105.855	105.761	129.233	123.148	122.204	244.75	225.846		192.077	197.25	178.5	222.52	217.712	202.06	218.818	220.462	188.231	205.5	137.651	139.317	135.568
103.43	102.475	103.048	107.051	105.287	105.593	130.736	121.663	122.86	240	217.667		199.455	180	184	220.42	214.558	203.72	199.385	204.154	199.769	210.833	137.851	136.416	133.82
103.585	101.054	102.546	105.649	105.38	103.681	128.812	121.69	122.592	242.583	222.462		197.692	200.818	182.909	218.44	213.923	204.229	206.5	221	212.083	208.583	140.192	136.474	135.003
103.142	101.35	103.692	105.554	106.461	105.607	127.031	122.087	119.377	232.917	214.385		196.231	184.231	175.909	221.62	219.308	200.458	200.917	231.1	188.333	196.385	137.768	137.356	134.901
103.81	100.806	103.952	105.365	106.097	105.787	125.96	121.498	121.171	238.667	220.923		200.1	187.615	170.692	217.962	223.653	205.846	211	208.692	195.923	202.417	138.631	137.609	135.365
102.696	102.38	104.215	105.608	105.906	105.467	127.786	122.306	120.596	238.5	230		195.583	190.5	182.909	216.64	214.212	205.98	210.154	211.615	194.846	203.5	137.342	137.837	134.358
103.294	101.083	102.495	106.115	105.66	106.984	129.144	122.932	120.717	259.333	219.462		202.273	184	178.923	225.3	215.163	199.88	210.846	228	198	185.917	138.362	137.942	134.775
103.741	101.794	102.41	106.712	104.872	104.327	129.371	122.583	121.109	244.5	220		191.75	180.308	193.5	218.98	217.154	199.56	213.917	235.5	198.231	184.583	137.303	136.222	135.099
104.576	101.905	101.981	104.438	105.847	106.391	127.458	121.996	121.26	245.167	233.3		193	174.333	171.917	223.8	213.212	207.865	204.25	216.182	197.667	196.833	137.929	137.718	133.684
104.63	100.902	104.893	104.409	104.231	106.073	129.102	124.306	121.2	240.833	235.917		195.833	194	181	224.9	215.923	208.76	225.231	201.917	218	205.167	139.406	139.139	134.142
104.34	101.806	103.195	104.139	105.715	104.994	126.672	121.435	121.055	242.333	230.818		187.923	193.083	174.923	224.24	226.02	204.98	225.167	205.231	202.091	199.667	140.752	137.165	136.498
102.567	102.439	103.681	104.955	106.924	107.298	127.515	122.326	120.08	246.167	224.833		192.333	195.909	168.923	223.72	215.731	203.854	213.333	207.846	198.727	194.167	138.948	135.873	133.956
104.183	102.138	102.839	103.822	106.833	104.853	128.764	121.203	120.947	226.769	215.25		193.231	196.818	184.545	216.271	214.365	204.94	228.1	212.091	207.75	185.714	140.581	136.006	135.478
103.66	102.73	102.694	104.542	104.774	105.831	128.174	122.293	122.23	237.083	220.846		191.583	179.692	178.846	221.88	218.885	205.04	242.2	210.636	210	192.846	139.835	135.551	134.839
103.256	101.66	103.29	105.322	104.022	106.111	129.154	122.774	120.405	221.917	224.846		197.25	186.615	192.727	211.938	221.62	202.3	222.769	218.636	199	188	138.14	135.509	136.159
104.127	101.231	103.634	104.179	102.669	106.058	127.451	123.799	123.268	239.333	211.385		195.5	189.667	184.75	216.917	218.846	209.72	213.308	207.667	199	207.818	138.555	137.663	134.552
104.476	101.672	103.933	104.189	104.842	106.028	128.283	121.982	121.574	238.167	220.385		197.75	169.615	186.545	224.75	222.34	198.74	228.083	214.25	208.727	203.091	139.91	137.06	137.829
104.762	100.571	102.7	103.718	104.481	106.398	127.755	123.707	122.324	243.417	217.308		187.583	185.545	174.308	225.062	214.769	201.404	212.923	208.077	198.333	209.182	139.851	132.792	134.727
103.747	100.301	103.165	104.105	104.7	105.132	128.663	122.6	121.576	256.25	222.077		187.077	191.182	181.769	223.28	213.904	199.98	215.167	216.667	209.083	204.667	138.148	135.262	136.758
105.63	102.409	103.775	105.384	105.547	106.313	129.742	123.083	121.687	240.833	241.5		196.538	190.091	180.25	222.98	214.596	198.058	214.462	215.231	205.833	197.75	140.784	136.899	137.111
105.08	103.574	104.054	106.688	105.597	106.776	128.759	123.321	122.432	241.667	224.417		192.5	199.25	182.308	223.375	218.654	202.212	212.769	209.846	201.75	180.857	139.876	136.486	134.003
106.148	102.071	103.987	103.926	105.112	105.064	128.301	121.414	120.451	238.923	212.583		194.917	176.615	175.077	223.38	225.3	204.26	205.462	217.5	194.462	198.833	138.177	136.437	134.468
104.674	101.228	102.82	104.561	105.297	105.968	127.98	122.447	122.188	240	230.273		190.833	171.308	178.923	222.34	219.885	194.75	211.333	218.846	207.5	196.5	139.832	135.067	135.099
104.585	103.681	104.814	105.564	105.082	105.567	129.546	121.667	121.35	242.833	217.462		202.5	191.75	181.6	219.327	222.26	202.521	202.286	213.917	204	192.846	137.876	137.415	134.506
105.712	101.366	102.912	103.845	104.782	103.929	127.62	122.742	121.078	238.583	216		184.167	188.769	177.308	224.94	218.077	208.673	209.857	227.909	203.615	191.154	138.025	137.054	136.779
104.166	103.99	102.518	106.179	104.821	104.926	127.494	122.313	121.79	249.917	233.455		191.231	191.462	184.182	228.104	223.2	202.25	205.75	209.077	206.833	200.333	137.927	138.821	134.801
104.65	101.775	103.981	103.984	104.253	105.917	128.731	121.319	121.96	254.25	228.364		190.417	181.615	183.385	220.646	223.32	198.346	210.714	217.917	204.308	198.846	137.832	137.829	135.911
103.194	101.455	102.761	105.795	104.291	105.633	128.993	121.81	121.559	248.308	217.615		197.75	181.462	183.308	223.64	217.923	208.846	213.154	219.083	204.818	201	138.784	139.12	134.756
105.318	103.064	102.644	105.962	105.994	106.829	127.363	121.811	122.004	239.615	239.273		197.583	190.462	191.455	223.88	219.404	198.66	227.917	220.545	207.083	184.25	139.524	136.951	134.532
102.737	101.411	104.125	105.06	104.617	104.681	129.06	121.491	120.126	276.5	219.538		193.273	181.786	167.615	223.265	222.173	201.04	211.75	212.25	199.154	191.5	140.022	137.748	134.924
103.479	100.763	102.762	104.716	105.611	105.044	128.716	122.528	122.147	250.333	228.636		190.727	186.143	180.333	215.271	213.288	202.22	213.583	210.167	200	194.308	138.844	139.146	136.003
105.025	102.396	103.915	106.734	104.715	106.741	128.057	122.593	121.434	247.769	219.417		196.5	174.643	179.25	228.367	218.962	206.04	205	216.727	206.75	209.083	140.152	138.505	133.123
103.329	101.853	103.517	103.435	105.795	105.865	129.887	120.834	119.761	241.583	226.909		199.917	197.818	173.308	224.208	213.827	204.7	221.5	220.308	200.583	195.077	137.879	138.972	137.095
103.959	102.558	103.656	103.06	106.365	105.236	129.519	123.306	121.157	251.923	225.273		199.75	187.545	177.818	231.833	218.8	203.58	207.231	216.25	197.5	193.923	138.598	137.552	134.109
104.263	101.201	103.981	105.256	104.519	105.074	129.742	121.384	120.939	237.333	232		196.909	188.417	178.8	218.02	212.731	200.308	217.692	207.214	207.154	191.917	137.846	137.6	133.807
104.846	101.285	103.618	104.549	105.731	104.459	129.82	122.378	121.041	236.25	220.5		181.714	185.615	185.308	208.135	214.538	202.08	218.667	193.571	205.727	204.818	138.244	137.319	134.994
103.498	101.891	105.139	105.905	104.28	105.778	130.071	122.763	121.598	225.25	232.545		184.75	180.286	172.385	218.86	215.942	204.231	217.692	216.154	189	205.455	139.638	139.236	135.532
103.174	102.751	103.763	107.36	104.168	108.786	128.126	121.931	120.812	245.462	229.273		200.25	187.167	173.231	221.84	225.417	202.02	201.615	227.417	202.083	187.833	138.285	138.18	136.135
103.653	103.234	103.435	106.481	103.827	107.816	128.857	121.705	121.018	245.231	217.833		202.417	184.077	174.545	213.292	212.981	203.981	214.143	217.545	207.545	199.909	137.673	137.849	137.029
103.379	102.933	103.66	105.529	105.749	106.537	129.762	122.337	121.971	263.6	250.9		185.5	186.333	182.545	221.562	224.16	201.38	202.077	224.583	189.167	178.923	138.686	138.937	135.807
103.554	103.24	102.492	105.333	104.461	107.08	130.482	123.737	120.718	244.615	227.583		187.462	190.909	179.769	222.92	214.019	202.481	216.833	210.571	197.857	178.429	139.221	136.498	133.776
102.463	103.048	103.103	105.125	106.834	107.182	127.705	122.384	121.226	238.538	218.923		205.818	179.923	190.364	227.458	220.058	205.94	220.154	218.917	195.083	202.923	136.918	138.826	134.785
104.215	102.846	103.3	105.673	105.608	106.103	129.872	123.197	121.013	242.5	224.333		199.909	186.182	176.385	216.096	216.904	208.938	228	219.833	202.5	198.417	137.7	139.054	132.821
102.641	101.261	103.503	105.111	103.24	106.22	128.786	120.943	120.72	228	215.308		204	179.643	184.6	220.938	217.135	202.923	219.75	215.462	206.25	212.333	138.67	136.425	135.734
102.791	102.442	105.044	105.716	105.686	107.013	128.123	122.604	120.29	235	223.846		197.909	177	176	225.292	214.981	202.75	211.5	209.167	193.5	190.75	137.832	137.206	135.635
104.511	103.131	103.833	104.019	104.444	105.37	128.823	122.3	120.497	240.667	216.667		189.167	184.615	169.846	222.98	215.577	204.346	220.615	220.167	204.231	206.417	139.108	135.898	134.843
103.885	101.613	104.489	105.451	104.575	106.658	128.573	123.089	121.539	241.077	213.417		200.455	174.154	180.182	222.878	217.712	206.58	205	209.615	201.231	205.273	138.209	138.832	134.921
103.997	103.311	103.58	105.792	105.3	107.984	128.818	123.265	120.184	238.231	250.5		189.846	184	176	220.531	214.096	205.288	218.077	218.333	206.455	211.273	138.671	138.353	136.146
103.599	101.196	104.783	106.174	103.516	106.162	127.474	122.457	121.177	236.75	239.9		199.417	195.364	170.769	215.8	220.077	204.74	224	215.538	201.154	213.455	139.378	138.537	135.93
103.396	102.905	102.484	105.577	104.438	106.647	128.926	122.43	119.878	251.583	223.667		196.833	188	179.455	220.306	214.942	200	233.5	211.75	199.615	203.182	138.479	136.549	135.636
103.646	101.883	104.837	107.426	104.912	105.821	129.618	124.144	121.378	239.077	220.583		196.727	178.286	172.769	219.76	218.837	204.52	208.077	221.417	204.273	191.143	140.329	138.301	135.064
102.815	102.974	103.936	104.844	105.886	106.682	128.527	123.32	122.739	238.333	219.846		205	174	184.154	215.833	217.143	205.538	224.1	206.923	202.308	208.545	138.142	135.899	134.94
103.022	102.578	104.414	104.669	105.716	106.212	129.28	123.815	120.913	248.333	231.364		193.3	180.5	186.818	208.66	216.385	204.82	209.385	214.667	196.25	202.143	137.076	138.267	135.833
103.826	103.023	103.846	104.946	105.071	105.331	129.062	123.112	120.098	247.25	225.083		199	184.8	188.909	225.592	209.981	209.404	223.1	223	207.75	207.333	140.317	136.073	133.867
104.311	102.834	103.968	104.143	105.339	106.799	129.318	121.945	120.904	243.5	250.1		194.1	183.538	176.154	214.1	209.808	201.46	207.818	220.455	197.273	207	137.94	136.487	136.064
104.077	101.697	104.07	105.211	104.675	106.035	128.712	122.114	120.122	237.667	239.8		204.636	177.286	169.538	213.962	216.365	207	227.1	217.417	210.583	195.769	138.268	137.123	134.32
102.7	102.137	104.058	106.099	103.693	107.016	127.944	120.546	122.367	256.5	210		197.692	171.462	180.917	220.312	217.94	207.9	218.364	228.273	208.091	210.333	139.956	136.152	133.556
103.096	101.307	104.796	104.099	103.696	106.363	128.3	121.172	121.483	245.917	227.091		190.615	179.083	174.667	220.654	212.04	207.404	214.462	208.154	204.167	201.5	138.965	139.022	135.348
104.273	101.707	103.3	103.84	104.463	107.827	129.424	122.56	121.452	251.75	232.3		202.917	199.091	191.7	223.208	226.833	199.308	210.385	219.182	219.545	201.917	139.908	137.112	136.144
102.609	102.629	103.852	105.369	105.109	106.864	129.872	122.756	121.579	240.167	224.077		196.667	189.833	189.909	216.385	220.66	201.558	210	242.6	203.917	199.308	139.968	139.93	135.203
102.873	101.697	102.779	105.77	105.172	105.924	128.795	122.347	122.444	244.583	239.3		198.75	174.786	174.846	211.769	217.519	202.788	206.769	221.75	207.727	195.357	140.545	139.555	136.714
103.032	100.968	103.361	106.135	105.592	104.436	129.232	121.074	121.244	243.385	231		193.083	171.308	186.6	224.265	214.731	203.038	210.5	219.231	207.909	199.429	139.519	138.2	135.073
102.411	102.428	105.221	107.119	104.152	106.965	129.274	122.04	121.894	234.25	215.846		193.083	193.833	172.077	217.019	223.269	200.94	213.615	223.3	209.273	199.167	139.886	139.656	138.458
103.623	101.814	103.868	106.314	106.297	106.643	129.998	122.925	121.263	248.667	234.7		191.818	179.462	172.231	215.673	216.115	203.327	210.615	216.25	208.273	193.846	138.415	140.143	136.614
104.933	102.275	103.413	107.192	106.738	106.842	129.775	121.585	122.532	247.167	240		190	188.2	188.545	222.163	218.615	201.462	210.615	212.308	205.364	191.071	137.228	139.803	134.451
104.226	101.481	103.975	104.668	106.073	104.735	128.721	122.204	120.953	238.308	225.167		183.769	195.091	169.154	215.577	220	203.365	202.385	215.636	191	197.75	138.901	139.6	134.562
101.837	101.229	104.262	105.247	103.623	106.542	129.771	121.85	120.506	249.75	221.417		194.083	189.364	181.818	212.385	218.4	202	207.385	207.154	196.667	200.917	140.49	138.747	136.557
104.191	103.391	103.861	105.003	103.026	106.756	128.927	122.394	120.796	245.917	225.846		198.667	195.636	175.6	222.14	219.442	199.34	221.538	214.5	196.833	205.923	139.535	140.272	136.321
103.968	101.76	105.561	106.59	103.923	104.927	128.879	122.051	120.976	251.917	223.583		194.273	192.615	179.364	208.865	217.038	204.519	216.833	215.5	190	192.231	139.962	137.174	137.028
103.584	102.115	104.606	105.84	106.392	106.449	127.687	123.42	121.422	261.417	209		200.909	182.286	173.231	217.442	217.56	194.769	203.692	220.077	200.583	203.545	141	139.193	136.038
104.297	101.994	105.535	105.533	105.294	107.073	129.214	122.6	120.621	249.25	221.833		199.917	178.786	184.615	225.408	219.115	203.26	228.8	211.917	201.833	196.5	140.863	139.561	136.879
105.538	103.744	103.744	104.981	105.627	105.877	129.176	122.063	122.206	261.75	227.583		203.636	189.455	183.364	216	217.788	204	223.667	202.385	201.077	184.75	140.596	139.427	134.038
104.368	102.904	103.707	105.067	105.644	105.352	129.348	121.394	121.445	251.538	219.308		194.167	185.917	173.5	223.673	220.48	201.72	203.769	217.5	197.75	207.231	138.324	140.63	135.016
103.455	101.593	103.847	104.71	105.452	106.067	129.559	122.175	121.311	242.917	220.846		204.455	180.4	185	217.019	220.08	204.192	201	185.231	204.308	193.214	137.756	138.471	135.218
102.217	101.42	104.104	106.048	104.994	106.465	129.199	122.071	120.11	244.083	221.5		197.083	198.833	182.846	213.423	218.25	203.712	208.231	211.25	198.5	186.25	138.171	138.785	136.073
103.462	100.625	104.098	104.375	105.615	104.839	130.143	123.549	120.882	249	245.5		197.667	179.571	191.273	211.462	215.25	199.615	202.077	220.5	195.583	208	138.842	138.766	134.342
103.199	101.924	106.241	104.545	105.542	106.645	128.945	122.302	121.301	243.75	232		169.5	178.231	179.385	212.212	213	209.327	222.3	216.583	212.417	204.545	139.902	139.549	135.285
102.665	102.073	105.107	105.259	105.403	105.305	127.792	123.222	122.166	256.417	211.917		188.7	188.25	171.455	214.423	217.82	206.14	215.692	227	201.667	209.364	141.218	138.559	137.27
104.731	102.436	104.224	104.162	105.545	107.887	130.638	123.106	122.119	244.667	212.083		192.636	175.917	169.077	216.058	214.115	201.06	211.308	217.417	195.5	200.286	137.003	137.94	136.147
102.732	105.446	105.416	105.511	104.839	106.798	129.775	121.8	121.159	238.083	220.818		183.357	168.846	179.154	219.062	215.365	203.8	227.5	211.769	212.091	208.231	140.294	137.06	135.305
104.718	102.07	104.776	105.168	103.837	106.337	129.74	123.392	121.282	248.083	217.231		195.727	194.2	184.6	220.51	217.2	205.596	213.615	220.75	190.929	214.167	140.991	138.383	136.317
103.177	103.016	105.083	104.064	104.232	106.987	129.126	121.388	121.592	225.538	242.1		182	187.455	179.154	217.3	218.154	202.404	222.091	218.5	199.083	203.364	138.042	139.94	137.234
104.583	102.605	104.376	104.801	105.163	104.626	129.996	123.423	122.258	247.917	221.417		190.3	189.667	188.417	213	216.25	198.558	236.1	231.692	206.727	210.75	137.782	137.327	135.306
103.423	101.911	104.271	104.446	107.054	104.872	129.726	122.639	122.542	238.333	230.273		185.077	198.182	184.182	216.788	218.827	203.788	239	221	192.308	208.909	139.75	140.199	136.46
103.298	103.804	105.927	104.636	105.889	105.841	129.403	122.413	122.539	236	215.417		201.667	190.6	173.692	219.692	215.019	205.94	211.077	222.333	202.917	205.583	139.306	140.498	136.057
105.323	102.587	104.505	104.959	102.797	105.622	129.403	123.197	121.361	244.583	214.75		200.727	186.615	183.917	223.846	215.212	207.923	209.923	223.333	196.308	215.917	138.139	137.734	134.274
105.168	101.686	102.274	104.915	103.256	106.105	130.464	122.671	122.676	251.833	214.308		198.182	188	187.273	214.769	216.163	210.192	230.2	204.462	203.929	207.455	140.13	139.478	133.894
105.107	101.679	104.876	106.351	105.577	105.608	128.547	122.24	122.073	258.75	214.182		198.692	184.308	178.231	220.837	216.519	203.327	207.154	207.5	197.846	209.818	138.956	139.879	134.289
106.222	103.364	104.363	106.132	105.352	105.063	129.361	120.964	120.716	242.833	224.091		191.923	200.25	167.923	229.1	206.25	202.25	215.231	211.769	203.667	201.692	138.56	138.181	135.535
105.073	101.57	104.521	104.708	105.655	108.886	128.082	122.324	121.765	261.25	213.077		194.923	176.846	184.909	211.596	217.058	203.75	214.615	206.769	202.455	208.545	139.003	141.768	136.329
104.296	101.372	103.312	104.89	102.759	106.522	129.381	121.635	121.116	249.417	222.455		189.154	189.636	165.231	212.06	217.885	203.173	235.7	213.167	201.25	215.727	137.342	139.81	136.349
104.256	102.367	102.073	103.968	105.256	107.469	130.942	121.803	122.051	249.5	220.385		198.364	188.857	170.692	216.776	213.692	208.5	207.091	224.667	198.429	200.154	138.994	139.241	136.413
103.358	102.581	103.088	104.325	105.78	107.394	129.112	122.435	121.905	245.667	219.667		209.727	191.083	177.333	213.077	224.54	201.615	234.4	216.333	201.643	199.818	137.222	138.902	134.69
103.373	102.535	104.401	105.334	105.252	106.052	129.55	123.051	121.993	257.167	222.667		198	187.3	180.462	217.904	217.019	200.558	234.6	209.917	191.786	197	137.184	138.492	135.241
104.965	102.09	103.085	102.771	104.028	107.109	129.667	121.885	120.082	253.667	217		207.364	184.077	187.5	209.885	213.571	201.462	223.4	209.833	206.75	204.5	138.503	138.006	135.426
104.873	102.571	104.319	104.215	103.443	105.385	128.203	123.404	121.157	258	242.091		195.909	186.615	181.273	219.245	215.712	194.558	221	207.846	213.273	198	141.47	136.721	136.317
104.645	102.757	103.242	105.198	105.11	107.057	129.285	120.925	122.115	248.75	215.75		189.231	185.231	181	208.962	215.22	204.481	246.5	204	209.929	209.455	138.449	136.816	134.397
103.899	102.309	102.306	105.057	104.288	104.67	130.292	122.039	121.467	255.75	218.167		197.583	182.909	172.154	209.308	209.481	202.846	202.615	220.417	202	190.538	138.095	137.513	136.025
105.73	101.16	102.707	103.349	105.282	105.276	130.487	123.147	121.166	250.583	220.917		188.455	186.917	188.917	218.633	215.6	204.98	222.231	207.667	195.917	205.538	138.657	138.841	132.652
104.029	100.329	103.529	103.462	104.65	105.429	129.291	122.175	120.654	245.833	214.462		186.462	179.333	186.583	222.1	223.521	201.75	232.182	208.538	201.071	194.083	135.953	139.816	134.737
103.838	103.285	102.881	103.53	105.881	105.518	131.996	122.613	120.546	249.167	227.455		204.182	185.769	186.25	214.02	207.288	206.25	222.9	210.462	209.417	206	136.975	138.987	136.197
104.073	104	104.53	106.433	106.243	105.906	131.737	122.991	121.42	241.167	221.692		193.727	173.857	178.462	214.5	216.46	201.365	219.077	209.333	201.5	201.385	140.074	137.892	137.127
104.605	102.863	103.76	105.184	104.723	105.971	129.637	121.714	119.854	238.417	228.462		204.5	179.769	179.833	214.44	218.192	210.731	226.077	217.769	214.75	204.667	139.702	139.149	135.735
104.559	102.981	102.401	105.679	104.329	105.861	130.732	122.184	122.789	248.667	220.385		200	196.833	173.923	209.769	217.962	199.673	219.615	221.5	195.333	207.385	139.439	137.396	136.765
103.262	102.767	104.073	104.156	105.194	105.47	130.086	122.007	120.867	250.417	218.417		188.385	184.909	176.769	215.192	219.808	199.404	221.538	219.833	207.667	202.769	139.585	139.193	137.355
105.204	103.606	104.112	105.394	104.396	105.211	130.335	122.456	123.702	238.25	216.692		191.923	177.5	176.769	221.918	217	200.981	240.4	218.833	194.385	215.833	140.14	137.111	137.159
105.157	102.126	102.621	104.006	103.77	107.006	130.005	123.326	120.211	244.083	223.455		204.182	191.833	180.231	210.192	212.816	207.942	229.182	215.154	201.667	196.25	138.883	137.487	136.211
103.797	101.795	104.861	104.455	103.604	106.227	128.582	121.81	121.551	252.667	222.385		214.364	190.455	175.769	214.077	215.24	202.231	225.154	225.231	204.083	213.1	138.362	137.47	134.909
103.282	102.436	104.438	104.08	104.679	106.321	130.129	122.386	121.424	246.167	218.692		188.692	183.769	170.462	216.731	223.75	203	222.462	215.231	218.667	198	138.696	140.677	136.248
103.186	102.548	103.23	103.748	106.88	108.003	129.982	121.699	122.591	240.167	247.2		205.727	189.545	182.333	220.885	215.854	209.28	214.692	209.25	203.538	200.923	136.858	137.26	136.288
104.158	104.554	102.256	104.932	105.194	106.691	129.06	122.683	121.248	244.833	212.923		209.364	188.909	183.5	213.231	226.208	197.558	221.231	211.833	203.286	197.5	138.712	139.473	136.057
104.435	101.87	103.315	105.41	105.695	105.939	129.115	121.619	120.111	244.167	246.1		197.923	187.4	178.385	214.365	222	204.942	211.385	201.214	192.154	206.417	137.346	136.456	135.81
104.823	103.122	103.527	105.59	105.43	105.756	129.716	122.58	120.434	243.583	239.455		192.231	193	167.929	214.5	216.51	199.212	214.818	227.167	198.077	192.538	141.298	138.171	136.904
102.832	103.102	103.514	105.245	104.759	106.323	128.159	124.762	121.206	246.833	228.727		196.846	177.231	189	215.24	214.673	204.115	223.385	216.333	200.857	202.818	138.422	136.422	135.457
103.358	102.843	103.917	104.202	105.195	106.889	128.29	122.794	121.923	241.583	245.909		196.615	188.846	185.615	210.538	221.72	200.192	225.462	214.667	196.615	193.077	138.052	139.295	136.321
104.067	102.804	103.071	104.678	104.413	108.522	128.274	122.949	121.693	243.667	224.909		208.833	179.5	178.692	215.76	218.062	199.019	237	223.833	210.636	216.7	139.702	138.551	136.918
103.56	103.103	103.714	105.196	105.519	106.869	129.764	123.37	121.456	248.667	229.9		196.462	192.818	185.917	219.72	223.729	199.404	212.308	212.75	195.923	211	138.487	138.139	134.699
103.942	103.491	103.347	105.01	105.044	106.428	129.436	122.159	121.845	261.917	213.615		197.818	187	194.455	212.827	215.612	199.788	215.417	218.667	195.154	221.364	138.737	137.801	136.547
104.089	102.467	103.568	103.076	104.505	107.806	129.924	122.701	121	240.75	231.273		205.545	186.846	175.385	214.692	216.54	203.962	208.308	202.538	189.75	211.545	137.968	137.178	135.533
102.425	103.606	103.385	102.917	104.595	107.568	130.69	121.339	121.743	246.583	211		200	185	183	215	212.288	204.462	211.462	222.455	195.286	198.846	137.724	137.724	135.283
104.472	101.497	105.095	105.513	105.737	107.63	128.98	122.053	121.204	253.917	224.833		208.545	182.333	170.154	219.26	219.32	198.365	229	212	200.308	205.083	138.26	138.187	136.422
103.934	103.019	105.294	103.179	105.807	107.185	129.883	121.306	121.018	252.75	206.385		199.923	179.231	185.583	214.423	215.878	209.481	211.091	211.769	207.917	197.714	139.199	138.631	134.168
102.946	102.915	101.913	104.362	105.481	107.323	128.33	121.293	120.542	249.25	235.636		194.545	198.833	187.182	226.188	216.923	200.788	218.923	211.167	192.714	196.25	137.475	137.943	136.468
103.671	102.083	102.732	105.728	104.604	106.506	129.788	121.633	121.122	266.083	218.692		202.417	180.077	173.462	214.846	221.812	202.1	232.1	220.25	206.818	210.727	136.727	138.627	135.152
103.57	102.169	103.962	104.177	106.12	106.905	128.082	120.67	121.273	260.583	229.818		192.5	192.917	190.636	218.44	217.122	198.962	210.769	202.75	188.615	199.923	138.163	137.079	136.032
103.187	101.769	102.937	105.218	104.373	107.492	130.777	122	121.002	239.75	226.385		207.636	185.333	185	219.038	217.02	204.577	206.538	216.167	186.769	207.545	137.718	138.381	137.633
104.609	101.741	102.315	104.104	104.885	105.516	129.938	120.172	120.894	270.167	217.154		202.818	191.636	177.667	222.469	220.857	203.692	218.692	205.308	195.308	188.167	139.652	137	135.725
103.255	101.574	103.495	104.792	105.11	106.743	130.252	122.098	122.575	251.75	227.727		201.308	190.333	180.818	220.66	222.245	201.635	213.077	210.417	194.857	205.25	138.577	136.597	137.228
103.086	101.328	104.617	103.642	104.873	106.44	131.752	122.085	122.729	252.417	225.615		190.154	185.167	183.083	216.827	222.729	204.385	253.1	227.75	209.25	192.25	139.421	139.705	136.019
103.725	102.553	103.467	103.601	106.158	105.099	128.528	120.374	122.122	266.25	216.182		206.091	182.231	184.909	223.16	223.898	204.462	227.091	215.417	196.923	205.462	140.574	138.241	136.877
102.892	102.824	105.548	104.915	104.022	104.744	129.299	121.927	122.073	255.917	222.231		201.75	189.455	176.846	217	231.102	201.635	235.1	221.25	207.333	203.25	139.064	137.838	135.937
102.867	102.824	103.411	105.179	105.79	105.329	130.235	122.485	122.169	256.417	223.917		198.692	185.25	183.25	212.6	225.208	210.077	223.154	196.385	199	202.636	139.087	139.18	136.917
105.083	102.59	103.648	104.26	104.431	104.949	129.602	121.719	119.816	255.5	216.333		207.091	180.538	194.182	215.192	223.88	205.808	239.7	207.462	203.833	205.385	137.731	138.269	135.877
103.149	101.349	104.803	104.641	105.606	106	129.786	121.245	122.565	264.417	212.5		196.583	180.923	195.25	214.923	229.673	207.942	246.6	215.833	209.636	200.545	138.75	137.8	137.904
103.533	102.35	103.984	104.495	106.361	107.051	129.71	119.762	120.344	257.083	208.692		195.692	193	188.909	220.192	215.938	204.808	220.846	208.25	202	203.182	139.061	137.003	136.371
102.771	102.442	104.688	105.806	106.019	106.107	129.328	121.617	120.969	268.25	216.333		207.091	194	184.182	220.981	220.4	203.308	218.583	217.385	208.833	199.545	139.103	138.486	135.937
103.99	101.641	103.707	105.032	104.016	104.01	127.881	121.075	120.524	242.167	225.769		181.923	187.909	179.308	226.14	224.429	201.346	219.308	211.583	211	210.818	138.413	137.295	135.396
103.94	102.748	103.032	104.626	105.696	106.305	128.283	121.688	122.283	259.333	214.846		214.182	185.7	170.077	218.654	222.792	203.712	206.538	211.583	217.273	198.333	138.248	140.799	135.566
103.46	102.238	103.051	105.706	105.229	105.261	130.725	121.086	122	258.917	232.636		204.818	191.167	193.083	222.846	225.042	201.173	221.154	209.667	214	195	138.965	137.987	137.083
103.436	101.581	103.647	103.918	104.621	104.481	128.726	121.725	121.65	262.333	233.273		187.692	204.909	180.182	221.173	226.479	203.923	219.231	215.917	197.615	203	140.34	140.062	134.44
103.211	103.237	103.856	104.511	106.615	107.038	129.345	121.96	119.998	252.083	226.091		208.909	186.917	181.364	220.596	230.625	197.885	227.182	207.167	214.333	190.385	140.965	135.679	134.936
104.091	102.888	102.54	103.804	103.712	107.935	130.128	121.814	120.679	259.5	215.667		203.545	170.333	190.818	223.596	222.896	200.5	223.857	239.3	225.273	205.923	138.655	137.93	136.604
102.676	101.457	102.457	104.519	104.39	106.095	130.342	121.982	121.881	255.083	226.091		204.154	180.308	179.364	214.86	227.896	199.769	212.167	210.667	208.333	191.75	141.173	135.295	134.449
103.776	102.182	104.469	105.593	104.322	105.454	129.235	121.058	121.519	265.333	223.917		202.091	187.917	172.143	219.212	229.367	208.962	222.583	212.615	202	207.25	138.325	137.222	134.781
103.291	103.013	102.077	104.146	104.019	105.99	130.52	121.749	124.415	257.667	228.583		185.636	179.25	174.364	225.46	229.688	199.654	211.333	196.077	214.273	197.333	137.419	137.517	137.434
102.174	102.474	103.89	103.732	106.341	105.367	128.896	121.187	121.664	262	223.909		192.5	194.385	176.667	218.82	234.083	201.962	224.154	214.333	210.75	202	136.756	138.506	133.57
104.408	102.217	103.158	104.383	104.227	105.579	129.261	122.698	123.173	241.583	216.75		206.909	178.786	180.538	216.72	222.5	201.981	206.462	218.583	212.417	202.333	136.759	136.327	136.364
102.725	103.041	102.814	104.383	104.326	106.151	129.407	121.758	122.289	254.5	211.615		205.5	177.692	182	219.58	221.52	203.058	228.417	218.5	203.5	201.077	138.797	138.236	137.019
101.687	101.917	103.044	103.216	104.63	107.688	130.358	122.571	122.487	259.25	227		187.923	186.077	185.667	218.94	225.5	199.385	212	212.333	210.75	213.818	138.839	137.86	135.566
102.506	101.816	102.742	104.766	105.397	106.449	131.489	123.062	122.018	250.5	213		208.923	185.636	178.833	215.66	229.22	205.981	219.308	217.538	207.667	188.615	139.506	141.533	135.028
102.265	101.809	103.211	104.423	105.119	106.079	128.987	121.467	123.529	245.75	229.727		195.091	185.455	178.75	220.7	226.4	204.654	221.692	206	203.917	193.538	139.127	135.609	134.797
104.451	101.87	102.473	104.85	103.712	106.436	129.469	121.002	122.602	246.167	219.167		196.538	172.5	182.545	222.096	227.333	200.577	217.2	207.583	196	199.727	138.044	135.022	135.943
104.167	103.772	103.955	105.987	105.823	108.244	129.334	123.19	121.79	259.083	214.583		203	181.417	171.786	217.673	224.417	203.98	206.077	209.385	201.583	199.077	136.589	136.756	134.351
102.94	100.643	102.486	103.949	105.984	106.924	129.154	121.597	121.512	259.75	221.167		191.083	195.167	181.364	226.5	220.771	206.308	215.833	201.667	213.25	204.75	136.655	137.202	135.997
102.823	103.144	102.429	105.422	105.856	104.852	129.064	121.837	121.725	253.333	217.417		197.364	199.5	191.455	220.58	220	201.558	230.1	214.75	203	210.25	137.307	137.234	135.551
103.406	102.47	102.502	105.561	104.689	104.701	132.374	121.887	120.943	233.333	224.091		197.417	194.455	180.727	220.38	222.184	209.019	222	208.615	200.727	224.727	138.908	137.866	137.18
103.266	103.833	102.302	105.571	104.975	106.208	130.46	121.774	123.011	249.417	216.083		205.727	195.5	174.615	225.5	225.542	200.615	206.083	210.917	200.75	198.636	136.984	136.89	134.476
103.492	101.836	102.621	104.206	105.079	105.101	130.198	122.599	122.15	250.583	237.636		201.182	191.083	173	219.212	215.9	197.635	204.727	214.083	194.25	213.167	138.905	137.192	135.892
102.77	101.157	102.164	103.19	103.946	105.56	130.285	122.75	121.644	254.833	220.417		191.923	188.385	174.818	231.021	223.646	207.019	228	228.3	202.308	199.25	139.263	138.146	135.247
102.895	103.505	103.315	104.265	104.825	106.594	132.172	121.365	121.936	254.5	221.833		192	195.077	174.615	225.28	225.062	203.558	207.231	196.077	202.167	200.308	138.587	137.237	136.057
104.182	102.81	104.063	103.384	103.647	109.068	130.841	121.548	120.777	247	222.167		203.769	202.909	167.692	217.7	227.34	203.42	212.769	222.25	215.273	203.083	139.788	137.265	133.965
103.307	102.849	102.842	105.423	104.402	106.617	131.115	123.331	121.669	254.5	217.538		194.769	188.273	185.417	219.24	216.54	203	208.923	216.091	193.333	200.571	139.435	137.834	134.848
105.121	103.009	105.147	104.556	104.339	104.563	130.299	121.077	121.106	253.667	227.417		206.818	185.75	181.583	222.38	217.58	207.92	222.909	224.091	203.333	203.154	139.238	136.641	135.433
102.291	102.106	104.294	104.458	105.437	106.472	129.759	122.675	123.175	242.667	226.091		194.538	185.462	173.769	221.635	229.479	203.385	218	207.545	189.692	204.231	140.349	138.951	138.218
102.288	101.038	101.975	105.953	105.474	107.087	130.677	122.54	121.989	250.25	224.231		213.417	188.1	172.615	222.76	229.02	201.75	210.231	242.2	190.167	208.417	141.34	137.513	135.68
104.073	100.997	103.492	102.765	105.438	105.177	131.488	121.355	122.477	249.917	223.077		208.636	200.417	186.364	221.7	213.66	201.5	222.231	209.182	199.182	202.786	140.44	137.733	135.975
104.878	103.927	102.795	104.244	106.574	107.193	131.179	122.791	122.546	255.917	226.417		199.385	192.167	185.545	222	228.375	200.731	214.769	210.75	199.545	193.154	140.858	139.708	136.601
101.278	103.737	102.588	103.994	104.698	107.382	130.879	122.562	122.482	249.75	228		199.846	196.917	176.308	225.08	229.438	206.404	206.545	199.75	197.667	203.583	140.808	136.597	135.032
103.842	101.171	102.114	105.205	104.229	108.381	130.73	121.105	122.417	251	223.636		198.167	178.786	188	223.8	228.204	197.481	211.083	207.615	205.917	205.25	138.108	137.737	136.781
103.127	104.318	102.817	104.565	105.288	106.396	131.179	120.416	121.718	252.333	223		195.692	187.167	178.636	219.4	224	200.385	202.833	222.545	190.917	204	140.248	137.076	134.573
102.522	102.785	103.12	105.353	105.3	108.067	130.929	121.591	120.138	243.75	218.846		188.462	179.571	179.692	219.308	226.857	199.25	216.75	211.231	210.583	203.583	138.111	138.549	136.782
102.719	103.437	101.927	103.127	103.574	106.479	130.325	120.841	122.449	249	228.583		197.538	190.308	173.091	218.788	220.854	200.481	212.385	202.182	213.25	199.667	140.17	138.159	136.427
103.642	102.898	102.189	105.351	104.663	106.57	129.746	122.601	121.826	248	214.667		195.364	184.583	165	225.75	219.292	209	210	200.333	207.692	209.538	139.34	139.153	135.869
104.69	101.833	102.959	103.95	104.689	104.68	130.925	121.269	122.561	250.167	226.25		193.231	188.667	172.25	218.5	224.062	202.635	220.636	206.636	213.25	199.667	141.23	136.756	137.474
104.029	102.654	102.088	103.636	104.728	106.288	131.058	120.806	120.053	255.083	220.417		204.545	175	178.909	219.4	225.479	198.615	206.833	210.357	212	200.083	140.632	137.036	135.07
102.639	101.978	101.972	103.451	105.997	106.11	129.69	121.709	122.766	250.667	223.333		195.615	184.5	175.667	217.52	218.667	199.212	221.75	208.333	206.25	198.083	139.344	138.593	135.405
102.506	102.025	103.844	103.797	104.109	106.535	130.02	120.345	122.366	249.083	216.333		200.727	185.25	176.385	222.962	219.771	204	222.5	228.273	200.923	203.75	139.117	137.422	134.533
102.624	103.14	103.117	105.191	103.997	106.981	130.087	119.1	122.596	242.417	236.833		202.727	183.833	176.538	216.712	223.25	206.46	215.455	207	205.333	201.583	139.227	136.838	134.728
102.59	102.048	102.754	104.798	104.506	107.297	131.396	120.931	121.77	246.833	224.083		213.364	189.692	168.923	219.56	217.04	204.385	217.923	216.417	193.833	198.077	139.353	139.198	134.734
104.31	102.592	104.524	104.929	105.702	105.509	130.987	121.405	121.261	253.583	219.417		204.455	187.5	173	223.714	214.9	205.72	225.667	220.917	204.923	201.417	139.974	137.698	135.769
103.363	100.901	102.511	103.831	105.868	107.565	129.674	123.2	121.117	249.833	223.167		199.75	183.636	187.833	219.596	219.854	202.462	214.846	209	202.333	196.25	141.067	136.943	135.026
104.701	103.06	103.596	106.201	104.724	105.269	130.763	121.319	121.507	261.083	210.833		200.231	193.167	176.357	222.7	220.292	205.82	216.769	210.923	209.909	203.167	138.74	135.438	135.41
104.769	102.167	103.227	105.519	105.712	104.808	129.649	122.489	122.166	238.417	236.75		214.364	192.7	176.143	224.188	216.25	211.16	218.917	209.462	203.385	184	141.111	135.26	134.981
103.627	102.134	103.552	103.289	105.811	105.385	130.463	122.487	122.656	257.167	223.154		196.417	190.182	178.462	225.44	218.292	207.02	224.917	206.909	211.583	197.769	139.927	136.305	135.648
104.304	102.812	102.991	104.113	104.245	105.892	131.884	121.976	121.799	260.417	228.083		199.083	186.846	168.692	229.479	231.729	202.192	216.25	208.5	195.077	192.429	139.873	138.929	136.611
103.824	102.997	102.994	103.911	106.694	104.905	131.839	121.532	121.918	263.833	230.333		194.923	190.636	185.583	217.981	216.7	201.577	213	212.167	202.083	197.5	140.971	137.7	135.294
104.173	102.409	103.72	105.198	105.911	106.295	131.546	121.642	122.129	257.917	207.769		200.909	193.25	174.923	222.4	213.02	204.54	212.615	211.091	216.583	200.333	141.903	135.731	134.949
103.006	101.685	101.836	105.107	104.558	106.481	130.669	122.086	122.177	267.333	231.75		184.462	192.667	182.364	221.6	218.292	205.365	195.154	211.769	193.923	197.667	139.047	136.968	135.939
103.785	103.188	103.047	104.942	106.117	106.236	130.543	122.352	121.858	257.833	227.455		190.692	183.769	179.909	216.64	225.188	206.404	213.077	207.154	202.462	206.667	140.418	135.659	138.238
102.794	102.5	104.662	104.958	105.088	107.064	131.836	121.004	120.259	273	231.5		206.364	182.231	189	221.596	219.667	198.077	210.077	205.75	208.923	212.909	139.889	137.23	135.889
102.228	101.911	102.997	104.953	105.28	106.664	130.407	121.892	121.805	264.417	226.333		211.182	195.833	181.5	224.231	222.875	202.019	221.462	211	199.308	200.25	141.468	135.205	135.175
103.94	101.234	104.82	106.536	106.045	105.537	131.702	122.117	121.858	260.917	207.5		202.333	192.417	172.231	216.481	211.36	197.192	219.5	203.083	194.5	202.273	137.945	136.054	135.429
103.123	102.617	102.617	104.157	105.732	107.181	129.171	121.801	121.929	252.25	220.417		197.083	188.333	173.385	221.288	223.604	203.269	204.083	200.417	202.154	201.833	139.19	136.464	134.581
104.016	101.156	103.598	105.704	103.771	104.492	132.562	121.713	121.213	257.917	213.167		199	164.833	185.583	225.8	214.229	210.5	231.25	206.333	203	182.923	141.268	138.146	135.362
103.425	102.087	103.35	104.583	105.711	104.968	129.452	120.823	121.668	257.5	218.833		200.385	178.385	179.417	224.808	217.792	198.06	222.538	209.417	202	184.231	138.086	137.038	135.753
102.629	101.897	102.536	105.161	105.035	105.597	131.603	121.927	121.538	259	211.333		194.417	178.25	172.462	221.92	222.429	198.269	227.7	199.091	209.462	194	140.923	135.196	135.234
104.178	104.599	104.332	104.965	106.916	105.801	130.693	121.418	121.106	243.333	218.769		198.75	185.5	172.75	224.48	216.771	203.538	229.083	215.917	201	196.75	138.582	136.146	135.019
103.819	102.212	103.76	105.968	104.375	105.394	130.534	121.919	121.651	256.167	208.917		195.692	183.923	169.5	223.48	213.84	198.923	218.385	218.077	187.923	186.643	138.139	136.08	137.421
103.404	102.531	103.201	104.23	104.908	105.153	130.571	120.895	122.228	248.083	222.083		187.5	188.833	176.786	228.02	217.64	202.88	238.8	210.5	205.167	197.909	139.942	137.565	136.167
103.184	102.78	103.751	105.426	105.073	105.419	129.964	122.405	121.937	243.417	220.167		198.231	179.083	182.091	223.25	222.438	202.577	226.9	199.333	198.917	207.364	138.617	137.214	133.848
104.927	101.441	103.117	105.846	105.331	107.271	130.512	121.927	121.531	242.167	204.077		204.182	178.385	182.308	227.28	211.98	201.423	223.333	203.5	208.769	196.917	141.237	136.585	135.111
102.868	102.262	103.576	104.498	105.487	107.538	129.469	122.294	122.763	244.333	213		191.417	181.357	181.385	229.021	210.94	202.846	213.917	219.333	197.5	195.667	140.719	135.562	134.146
102.773	103.308	103.258	106.151	104.373	106.975	129.87	122.35	121.107	234.75	220.667		194.167	189.333	174.929	221.46	212.896	203.38	218.769	200.462	206.455	194.333	140.633	134.968	133.899
104.672	102.59	103.118	106.17	105.133	106.124	130.009	122.496	122.512	248.333	215.667		194.083	180.75	170.5	230.938	220.06	207.46	212	208.538	199.667	181	139.51	135.79	134.462
102.795	103.013	103.379	103.535	104.889	106.714	129.299	121.92	122.4	253.667	217.833		197	193.333	170.25	223.02	221.062	202.5	216.5	213.714	206.364	195.833	141.503	135.632	136.766
102.808	102.323	104.609	104.87	105	105.946	129.842	122.463	121.769	267	216.917		198.091	175.929	176.077	222.32	215.76	210.875	216.833	216.154	193.214	207.818	140.186	135.051	135.348
103.994	103.115	103.753	103.718	104.984	108.702	129.566	121.175	122.046	243.417	221.917		198.909	194.25	169.786	227.94	217.417	206.14	213.417	216.077	199.167	197	140.609	135.959	134.62
102.148	102.648	102.356	105.904	105.401	105.644	130.762	122.4	122.369	246.25	221.5		206.917	179.538	175.154	221.62	217.38	199.962	217.462	206.231	198.077	207.5	139.497	136.473	132.563
103.574	102.694	104.46	106.192	104.344	105.631	129.346	123.08	121.408	237.923	221.769		191.167	184	174.308	224.62	211.06	210.4	208.75	227	209.917	204.273	140.625	134.898	136.168
102.952	102.535	103.013	106.885	104.714	105.231	129.824	121.391	122.197	243.083	232.583		212.091	176	183.5	225	212.66	208.04	212	211.833	193.25	200.75	139.994	133.619	134.829
103.557	103.686	102.615	105.112	105.74	103.99	129.7	122.19	121.56	250.417	215.231		189.667	175.857	182.083	229.9	217.02	203.173	217.538	225.917	193.154	205.5	140.41	134.842	135.741
103.177	102.452	103.764	105.349	105.894	105.081	130.76	122.893	121.544	242.769	220.333		204.727	186.167	165.615	234.354	214.62	205.12	214.083	216.769	202.846	196	140.551	135.368	137.098
103.532	102.388	103.554	105.557	106.927	106.228	130.061	121.44	121.922	252.333	228.154		213.417	188.462	176.615	229.646	217.082	199.212	220.462	214.769	189.917	194.417	138.535	135.407	135.804
102.666	102.685	104.217	106.217	105.57	106.449	131.67	120.478	121.787	242.75	239.75		207.182	197.583	169.769	225.288	216.438	198.404	213.308	223.545	201.417	207.75	137.487	134.411	135.25
104.69	101.302	102.652	104.635	106.298	104.871	131.092	122.367	123.941	245.667	227.333		195.417	193	176.929	217.612	223.76	199.673	209.846	195.846	203.25	187	138.921	133.141	135.829
103.955	102.901	101.035	105.175	106.597	105.63	130.966	121.619	123.116	245.154	224.667		202.364	179.583	175.154	223.72	219.66	198.577	217.333	208.154	203.417	194.417	140.365	135.781	135.648
103.545	102.571	102.16	103.776	105.035	107.718	130.061	122.473	123.331	243.083	212.75		197.7	187.833	179.462	233.542	215	194.154	210.5	201	193.25	186.667	138.135	133.49	135.206
102.694	102.428	103.886	104.386	105.956	107.153	130.622	122.157	123.478	252.385	218.154		184.077	198.273	175.385	227.458	217.896	204.404	219.667	213.75	196.385	197	137.342	135.737	133.332
103.199	103.183	102.555	106.2	104.854	107.244	129.583	122.81	122.742	254.583	223.833		210.167	178.769	177.071	224.32	223.396	201.135	230.333	196.25	202.667	199	140.939	135.351	134.362
103.152	103.292	104.038	103.833	105.685	107.217	129.82	120.345	122.42	237.615	225.417		211.833	180.154	181.231	225.708	214.771	200.74	207.5	216.615	201.917	207.545	138.949	137.104	133.75
103.525	102.463	103.697	105.403	106.896	106.213	130.964	122.537	122.807	240.846	218.917		202.5	184.462	192.182	220.061	218.64	200.115	213.923	209.385	204.167	191.333	138.734	135.8	134.861
102.688	102.641	103.423	103.639	105.561	106.259	130.908	121.38	121.049	257.417	236.667		202.167	181.231	188.667	232.312	216.375	198.56	216.273	215.182	207.667	203.273	139.867	134.352	134.529
104.323	102.952	102.088	104.844	105.053	106.305	130.403	122.063	122.729	248.231	256		204.75	185.833	187.583	221.54	224.583	204.24	214.692	202.571	211.583	181.538	139.045	135.654	133.68
101.565	101.55	103.372	104.487	106.348	107.845	128.093	122.178	123.508	260.818	209.167		205.9	197.333	174.75	220.96	215.46	202.058	219.583	210.333	197.083	179.071	138.638	135.673	137.396
103.601	101.895	102.076	104.718	106.329	106.067	128.171	121.127	123.515	252.308	221.833		189.667	193.167	184	225.84	216.66	209.94	211.923	212.917	204.917	187.846	139.022	135.977	135.948
103.434	102.696	101.695	104.588	105.76	106.147	128.797	121.452	121.129	250.417	228.545		192.583	187.273	170.385	228.125	216.02	204.74	203.083	205.308	189.167	186.846	139.978	136.46	136.489
101.206	101.571	104.47	103.743	105.197	105.904	129.975	122.441	121.897	251.667	226.083		207.636	197.727	176.538	217.8	223.854	197.904	210.692	208.083	205.5	205	138.184	134.728	134.434
104.293	101.032	104.041	105.5	105.487	106.365	129.681	120.423	123.481	237.083	226.364		210.455	181.462	173.923	231.224	221.562	209.88	211	208.833	192.417	191.727	137.522	135.856	134.243
102.943	102.551	101.713	104.833	104.963	106.532	131.235	121.882	122.828	257.5	226.75		197	181.833	186.25	218.808	217.16	211.417	205.923	218.75	193.5	195.417	138.683	135.27	136.879
103.218	102.652	103.205	105.915	106.753	106.715	129.324	121.859	121.667	250.25	239.417		190.923	183.25	175.538	220.327	219.667	206.396	202.692	206.231	193.75	196.167	136.158	137.53	137.353
104.096	102.174	103.852	105.228	104.848	108.155	130.923	122.451	123.632	247.923	229.909		199	199.917	185.091	214.898	223.24	204.02	216.769	217.5	205.167	200.273	136.994	135.636	134.354
103.451	103.199	104.032	104.297	105.677	105.476	127.975	121.912	121.94	255.462	233.462		197.667	183.333	176.231	223.521	226.167	201.18	209.385	223	189.417	208	137.886	138.115	134.703
102.824	101.412	103.792	102.541	105.33	107.795	130.238	120.956	123.29	265.917	244.1		198.833	198	177.333	220.531	220.417	201.58	224.538	203.833	190.25	194.833	138.07	136.103	134.88
102.351	102.725	103.82	105.734	105.074	105.693	128.886	121.676	123.076	265.583	222.231		205.636	183.286	182.429	226.531	223.042	200.6	214.846	225.75	189.417	194.417	140.08	137.212	134.832
101.994	103.527	103.019	105.329	106.272	107.438	131.787	122.013	123.572	254.25	225.727		194.615	183.538	190.385	213.51	219.625	206.88	218.154	207.417	199.333	199.077	139.426	136.5	137.442
102.82	102.817	102.971	105.013	105.173	105.392	130.127	121.635	121.845	257.75	228.583		196.25	189.154	179.714	215.019	221.88	201.68	206.462	210.818	207.75	207.727	137.599	135.997	135.835
102.864	102.215	104.278	104.706	103.975	106.175	130.584	120.605	122.157	257.333	229.167		197.583	183.417	182.75	222.2	220.521	201.34	227.167	213.308	202.923	216.333	138.686	136.981	137.323
102.514	102.981	102.093	104.524	103.576	106.239	129.928	121.77	122.896	251.917	217.417		202.333	190.636	185.583	220.64	221.521	212.8	201.214	216.385	196.75	196.182	140.958	136.308	135.054
103.715	102.688	103	103.902	104.251	106.533	131.023	121.886	121.488	258.333	211.583		209.727	195.083	183	216.796	219.48	201.36	213.182	211.214	202.167	198.167	137.561	136.449	136.665
102.949	102.758	104.235	104.543	105.684	106.083	128.285	120.066	124.489	247.923	223.333		197.818	171.857	183.308	213.88	220.667	201.808	219.75	218.636	205.167	193.462	139.857	137.077	136.146
103.569	102.744	103	104.809	102.872	107.795	129.765	121.352	123.432	255.083	222.231		195.833	192	181.308	223.714	225.771	206.667	220.385	222.5	205.417	192.923	137.25	136.473	136.668
102.489	101.576	103.341	104.697	104.808	106.729	128.995	121.727	122.094	254.917	222.75		197.364	186.214	175.833	224.021	216.962	207.92	210.692	216.417	194	204.636	137.952	136.619	136.684
103.063	101.07	101.445	105.362	105.943	108.668	130.013	121.211	122.053	261.5	210.692		204.818	194.538	170.769	213.519	219.36	200.72	234.667	222.167	201.083	196.75	138.367	137.829	136.142
103.668	101.635	101.924	104.139	106.118	105.455	127.676	120.518	122.599	257.167	216.25		196.545	192	186	220.2	222.604	211.542	211.308	212.286	194.692	206.077	138.122	138.747	135.358
103.508	102.981	103.353	104.455	104.429	105.706	128.833	120.299	122.884	258.583	214.769		199.692	178.462	187.545	215.404	221.062	202.88	224.083	204.167	207.167	196.385	137.463	138.508	135.696
103.24	101.49	102.514	103.613	104.532	107.351	129.136	120.595	122.882	262.833	230.091		206.636	192.333	188	212.212	224.854	206.24	208.154	233.667	203.417	202.615	136.842	138.301	136.446
103.632	100.824	103.445	104.714	105.066	107.875	128.62	122.489	121.918	265.833	217.077		207.769	182.077	169.077	212.519	211.833	201.062	216.462	211.385	201.417	189.615	137.762	137.12	136.747
102.3	101.281	102.934	105.603	104.766	108.615	128.432	122.248	122.809	254.75	215.615		195.308	183.909	186.077	218.654	217.167	201.5	218	226.714	196.462	203.636	139.492	136.822	135.484
104	101.423	101.562	104.487	104.667	106.597	130.19	122.334	123.145	247.75	247.9		212.182	183.182	173.846	229.812	221.875	209.312	228.25	218.636	193.462	204.417	137.822	139.451	136.851
102.475	102.422	102.869	102.785	104.755	106.121	128.482	120.59	121.805	257.583	241.7		191.231	194.667	182.333	222.442	215.4	202.26	214.615	216.308	192.917	190.462	137.029	137.455	136.408
103.241	102.106	103.786	104.789	105.808	106.141	128.667	121.062	122.324	253.417	225.909		181.538	196.167	191.75	216.808	219.271	199.1	215.308	224.308	192.308	202.833	136.79	138.844	136.644
104.413	101.699	103.347	105.342	105.083	106.968	128.649	121.013	123.106	253	224.231		193.154	182	182.769	217.25	218.375	202.125	204.75	212.923	197.667	200	138.117	136.667	135.829
104.132	102.766	102.968	104.734	104.484	106.119	129.362	120.361	122.392	268.5	220.077		205.231	197.727	174.462	214.904	219.646	200.58	218.769	206.462	195.25	200.833	138.598	137.375	137.929
104.449	101.516	102.696	104.368	104.811	106.551	128.572	121.854	123.21	257.25	225.917		194.727	177.429	181.462	217.2	216.26	198.56	216.769	223.583	195.917	196.25	138.752	136.952	134.902
102.911	101.933	102.388	103.867	105.235	107.56	129.798	121.844	123.739	241.25	217.917		204.333	183.091	183.667	222.38	225.375	209.833	212	216.667	199.75	195.833	136.984	137.478	136.06
104.364	102.754	103.353	105.613	105.184	106.025	129.211	121.099	121.33	235.667	237.455		197.231	185.833	175.462	214.615	216.021	207.9	216.462	209.364	194.417	201.545	138.083	135.846	136.474
103.076	101.587	104.545	104.377	106.705	106.551	130.252	120.38	122.754	251.667	222.25		211.25	180.917	184.75	219	222.396	197.6	200.692	225.818	207.833	197.167	139.029	137.848	134.492
101.807	101.41	102.921	104.468	102.707	104.687	129.611	121.667	122.634	240.583	227.846		206.833	187	191.077	215.7	221.76	201.2	212.273	214.5	204	197.923	137.67	138.263	135.765
103.908	101.45	102.159	104.438	106.252	107.754	128.581	120.826	122.429	243.667	227.385		210.909	183.417	181.25	222.58	218.75	202.7	210.308	234.6	196.417	200.308	137.759	139.099	133.548
104.604	102.105	104.603	104.417	105.169	104.778	127.378	121.385	122.827	235.077	248.9		205.727	189.667	183.538	216.76	217.875	203.562	215.455	233.615	204.083	202	136.419	137.676	135.651
101.904	103.042	104.375	104.706	106.137	104.911	128.821	122.276	122.917	243.5	233.692		196.154	190.333	185.615	219.92	224.875	198.14	209.538	213.667	208.818	181.917	137.324	138.727	135.426
102.709	102.717	104.093	103.495	106.076	106.327	129.964	123.009	121.275	236.846	221.385		184.231	182.182	174.385	228.521	219.396	198.18	202.308	218.545	209.091	198.231	137.346	137.883	134.785
103.491	101.923	102.319	104.019	105.353	107.038	128.554	121.674	122.599	244.167	224.818		187.083	179	186.167	216.96	214.98	209.396	219.5	206.727	211.273	187.333	138.237	137.457	135.788
103.905	101.697	104.388	104.082	105.435	105.607	127.326	122.09	122.06	241.769	223.923		198.333	200.455	189.455	227.604	215.417	205.812	212.636	210.818	203	199.846	137.08	137.149	135.737
103.152	102.58	102.722	106.219	105.029	105.392	127.296	122.682	121.902	246.692	239.182		196	177.077	172.692	224.36	218.58	205.75	225.25	223.364	207.385	200.083	138.244	139.877	135.051
104.038	102.426	104.229	104.748	105.446	107.244	128.656	122.423	121.808	253.25	249.3		192.5	181.417	183.091	224.66	220.75	200.75	232	210.917	208.5	199.308	136.788	139.206	133.894
103.449	101.889	102.812	104.719	106.43	107.625	129.054	122.338	121.261	240.417	222.917		199.167	185.167	191.692	224.521	221.38	207.146	211.833	209.917	201.727	199.167	135.772	137.456	134.769
102.617	100.827	102.806	104.112	103.307	105.27	128.814	119.877	121.571	243.25	234.182		198.545	190.091	174.071	223.38	211.458	202.58	218.769	217	192.833	199	137.769	137.12	136.917
102.291	101.168	102.091	105.604	105.275	106.291	127.404	122.164	121.658	231.667	222		199.75	199.091	174.308	225.64	206.365	202.2	202	214.909	202.846	197.231	137.756	138.599	136.397
103.094	101.599	102.814	104.814	105.994	107.25	128.324	121.389	122.88	258.167	243.1		206.333	185.545	186.917	225.54	225.479	204.84	207.846	211	203.667	196.727	137.596	138.747	135.59
103.633	102.192	103.748	103.188	105.042	106.013	128.962	122.714	121.035	251.333	237.636		197.667	181.545	186.3	217.896	214.061	201.812	204.692	229.273	198.583	193.833	136.787	137.532	137.446
104.071	100.534	102.868	105.103	105.419	105.104	127.69	122.793	122.736	242.833	228.636		192.231	189.917	191.182	215.98	220.66	204.333	217.462	217.692	194.154	197.455	135.186	139.14	138.416
104.337	101.981	103.795	105.946	105.676	106.457	128.629	122.372	122.712	241	213.667		195.667	201.273	190.2	218.102	209.827	204.98	206.154	219.385	203.231	201	137.644	137.06	138.133
101.939	101.984	101.479	104.425	104.937	106.522	127.897	121.778	120.858	238.667	235.636		197.818	198.455	175.5	215.646	219.917	205.542	200.231	222.167	209.727	211.273	137.644	139.337	136.155
102.048	102.029	105.994	105.883	105.642	106.244	127.473	122.865	122.759	249.333	225.385		199.385	195	171.286	217.038	213.692	209.021	208.538	208.083	192.154	190.333	137.611	137.185	135.468
104.414	103.186	105.251	105	104.827	107.282	129.309	121.827	122.938	248.667	229.231		205.167	182.538	178.357	220.24	218.562	208.833	214.357	210.25	209	200.273	138.765	135.965	135.143
102.804	101.788	104.462	106.052	105.01	103.522	128.349	122.748	123.163	252.5	236.583		185.308	177.692	186.25	217.792	215.333	201.688	224.364	207.833	212.727	204.5	138.3	137.819	135.937
101.88	104.063	104.921	103.821	103.382	104.867	128.138	122.363	124.02	243.083	211.846		202.636	198.727	179.214	218.542	229.98	204.36	214.786	217.154	195.929	197.455	139.477	136.229	136.054
102.585	101.776	104.268	104.115	106.599	105.908	128.255	121.49	121.488	246.5	238.917		188.769	184.077	177.462	216.327	221.224	195.52	213.5	229.2	217.333	203	139.467	136.237	133.457
103.019	103.332	104.527	104.517	105.519	105.484	127.352	121.865	121.496	257.25	231		200.273	188.462	179.333	216.417	210.604	207.917	223.727	214.25	217.2	188.692	136.752	138.335	134.89
102.703	101.578	103.88	106.173	105.494	105.665	128.418	122.945	123.54	251.75	241		189.385	187.909	181.273	220.562	215.94	203.2	213.429	228.3	211.273	202	141.401	137.962	135.981
103.265	102.731	103.942	103.449	106.554	105.222	129.993	120.987	123.292	247.667	228.917		203.727	189.769	174	217.061	218.408	203.042	226.5	227.7	201.692	204.75	137.897	136.41	135.384
104.035	102.121	102.776	105.844	103.471	105.792	128.28	122.108	123.78	250.25	238.583		208.455	193.364	180.182	217.667	218.458	204.04	200.615	222	206.231	194.455	141.308	136.693	134.76
103.126	100.85	103.738	104.663	103.521	106.473	126.226	122.436	122.79	263.75	223.333		200.545	206.364	184.833	217.312	213.896	205.188	231.5	229.3	202.583	209.667	139.276	134.196	136.373
104.609	101.334	102.549	104.92	104.868	104.88	127.644	120.883	121.748	253.75	220.385		187	191.909	182.909	223.02	214.192	205.604	206.615	210.231	207.923	187.273	139.224	135.187	135.945
102.612	102.535	102.391	105.962	105.535	105.133	127.823	121.721	121.785	249.583	208.923		202.364	195.154	173.462	219.204	211.5	207.26	226.417	209.692	217.462	193.5	136.971	134.791	135.89
101.729	102.385	105.224	104.613	104.069	105.009	127.654	121.011	122.626	245.5	230		201	180.077	177.5	220.938	208.096	195.76	215.615	213.231	209.923	197.083	138.958	136	135.895
103.915	102.194	102.404	104.744	105.24	106.457	128.002	122.717	121.113	243.917	216.538		207.091	180.615	190.167	218.184	216.135	198.38	209.154	227.4	200.75	190.923	136.946	137.105	137.298
103.855	102.103	103.293	105.994	105.396	106.421	127.767	121.661	121.469	241	231.333		196.083	196.909	179.538	216.729	218.577	204.667	215.846	196.571	215.364	193.417	138.083	138.974	136.832
103.931	101.442	102.628	104.249	105.764	106.571	127.662	122.086	122.184	247.083	227.167		192.833	200.364	177.333	213.46	219.16	203.646	214.583	224.3	217.727	195.833	138.747	138.006	135.838
103.41	101.689	102.952	104.811	106.737	106.907	127.936	122.676	121.482	251	235.917		203.75	181.462	175.357	220.5	217.75	200.729	215	236.1	204.545	200.833	137.152	138.231	135.571
102.577	102.682	103.345	105.141	104.177	107.315	126.982	122.674	121.493	246.167	229.083		184.692	200.364	171.231	224.102	221.769	196.06	221.273	234.9	212	199.417	139.26	138.394	135.709
102.754	100.883	103.329	105.055	106.267	106.035	128.747	122.277	120.595	249.5	240.167		188.077	196.5	174.769	213.654	220.173	206.271	205.75	207	207.385	205.5	137.702	137.19	137.965
103.744	101.615	102.385	105.268	106.659	104.899	125.769	122.385	120.698	245	217.231		195	186.462	186.273	215.469	218.827	205.88	218.364	207.333	199.462	198.417	138.279	138.393	137.539
102.375	100.365	101.871	104.38	104.736	104.038	126.653	121.814	121.551	244.167	216.923		208.545	177.75	162.154	222.979	219.2	201.729	236.091	218.462	203.5	209	139.054	137.158	136.599
102.685	101.436	103.163	104.709	103.886	107.981	127.048	122.366	121.551	253.583	230.917		201.182	189.667	180.077	219.939	220.154	207.18	219.692	238.5	204.545	197	138.934	137.12	136.763
103.322	102.503	104.05	104.869	105.104	105.188	127.175	120.762	122.56	264.333	235.167		203.077	183	183.455	207.792	228.14	203.021	221.385	246.9	201.917	195	137.753	137.924	137.139
102.514	101.952	103.621	105.943	104.077	108.138	127.152	121.069	122.066	252.923	219.846		191.385	191.75	168.615	220.64	216.212	204.615	212.571	230.1	190.846	189	138.66	138.401	137.849
102.019	101.688	103.287	103.893	104.292	106.307	127.635	122.094	121.253	257.917	235.833		194.917	182.308	185	213.92	221.86	202.34	216.615	248.4	184.231	205.75	138.561	138.051	135.152
102.937	100.861	101.776	103.581	105.825	107.429	129.319	122.662	121.956	246.583	237.75		193.833	192.917	176.8	216.021	219.5	203.86	220.538	219.091	210.667	200.615	138.583	138.498	136.126
104.151	100.289	103.479	105.016	105.51	105.516	128.215	122.02	121.737	248.667	237.583		207.3	162.25	171.5	219.312	220.731	208.188	220.5	242.3	207.273	200.75	137.074	135.538	137.694
103.795	100.841	101.929	104.277	105.253	106.953	127.978	122.089	121.066	247	228		202.545	181.083	183.308	218.54	221.06	203.938	217.917	239.9	212.154	202.417	136.91	138.306	136.653
103.096	102.541	103.006	103.59	105.517	106.152	127.462	122.095	120.8	252.308	221.583		194.636	180.9	176.154	224.208	218.558	200.8	207.846	213.071	212.75	208.077	138.54	137.006	136.404
103.183	101.764	103.139	104.696	105.641	106.547	127.854	121.265	123.263	257.167	233.333		204.5	192.667	179.455	219.26	219.72	205.98	210.917	235	197.667	182.786	136.317	136.003	136.212
102.25	101.895	103	105.253	107.003	105.942	128.033	122.487	121.67	243.846	231		200.5	187.636	178.214	219.604	218.923	202.6	202.714	222.727	198.333	193.75	137.772	137.273	134.709
102.766	100.521	104.439	104	104.218	107.552	127.493	121.163	121.404	253.583	220.667		187.923	174.231	173.538	226.583	232.24	210.312	224.909	241.3	198.077	208.25	139.615	138.102	135.203
104.215	101.879	104.123	103.573	106.476	106.516	127.758	121.511	123.159	261.083	222.25		203.182	193.5	181.917	224.542	227.24	204.88	200.462	214.846	197.091	209.417	137.622	140.703	137.299
103.404	101.427	103.045	104.66	106.339	107.243	127.65	120.35	122.043	247.833	233.769		188.846	183.385	177.417	216.625	223.7	206.3	212.727	236.2	200.231	203.917	137.309	137.49	136.886
102.849	99.1238	103.458	104.881	105.424	105.853	126.685	121.646	121.345	252.333	231.5		194.538	187.231	171.643	218.604	221.771	209.26	193.357	233.75	211	198.333	138.029	137.721	136.606
103.439	100.169	102.284	106.15	104.481	106.331	128.186	120.985	121.54	252	220.385		197.583	193.583	173.083	228.958	228.36	197.9	220.727	214.786	198.077	198.769	140.09	138.731	136.206
102.048	101.638	104.095	105.009	106.974	104.852	126.817	122.265	121.474	244.417	223		194.75	189.667	189.583	226.417	224.64	204.231	210.231	219.615	208.083	201.385	136.739	137.548	136.055
102.808	100.952	103.554	105.167	106.315	105.397	126.277	121.308	122.181	252.923	224.833		197.286	188.615	187.167	217.96	229.56	202.4	210	220.231	205.5	224	138.11	138.878	137.797
103.958	102.779	103.429	103.99	106.621	106.473	127	121.835	122.18	257.5	226.538		198.667	190.909	172.615	223.229	224.04	201.04	205.214	212.929	203.077	196.643	137.545	139.406	138.549
103.151	101.652	101.202	104.577	104.804	106.482	126.973	121.554	119.654	251.417	234.25		191.357	187.5	177.917	224.021	222.24	199.58	208.538	220.833	215.083	197.286	136.894	137.917	137.218
102.343	101.403	102.552	106.442	103.943	104.565	126.914	121.469	121.673	253.917	215.923		203.917	196.364	183.273	225.188	218.02	205.312	201.538	229.417	194.167	202.071	139.703	136.405	135.968
104.67	101.693	103.068	102.61	105.169	106.24	126.58	123.29	121.257	260.917	225.417		193.583	199.182	186.083	223.729	229.92	202.12	207.769	229.083	212.417	206.727	137.961	139.449	137.597
106.712	101.885	103.205	104.608	105.823	105.933	126.562	121.181	121.324	251.308	226.25		192.417	192.636	172.083	226.417	219.312	205.04	214.25	227.917	208	213.636	137.479	137.433	138.41
103.728	103.073	103.339	103.332	105.342	105.079	126.286	122.434	122.078	253.667	222.417		199.818	183.545	189	220.188	226.9	202.1	211.167	229.333	219.667	200.917	138.977	135.513	137.388
102.821	102.394	101.868	103.625	106.962	105.896	129.075	122.148	121.477	265.917	224.917		201	197.333	180.9	227.062	222.542	211.938	212.75	224.615	193.083	215.667	137.308	137.283	141.561
103.218	101.063	101.609	104.119	104.631	107.109	126.402	121.404	122.389	248.692	224.667		192.077	183.385	184.6	221.729	221.312	203.92	213.769	229.077	192	201.308	138.052	137.865	142.631
102.772	101.166	103.331	104.068	103.411	107.697	125.962	122.015	122.781	250.833	217		192.818	193.273	172.286	224.062	224.146	202.22	208.923	234	193.583	210	138.737	136.491	142.377
103.369	101.09	103.997	103.858	105.365	106.835	126.881	122.108	120.556	247.462	221.333		209.8	181.462	180.917	223.188	222.204	205.188	208.5	228.833	199.167	205.357	138.215	139.348	142.687
101.929	101.34	102.811	104.42	105.921	105.607	127.847	121.114	123.224	243.583	221.583		203.25	181.5	192.364	219.84	215.9	205.32	219.455	231.25	192.143	208	137.477	135.229	141.361
101.949	102.63	101.955	104.925	105.161	106.244	129.23	121.36	122.635	246.5	215.462		195.917	182	168.462	217.25	222.667	203.06	197.357	220.417	194.462	200.583	137.732	136.307	142.432
102.574	101.214	103.432	104.559	104.914	105.256	127.938	121.208	121.398	256.417	215.154		194.769	193.615	169.538	226.271	230.417	212.46	200.231	217.769	205.167	213.083	139.54	138.294	142.082
102.077	101.118	103.328	103.658	103.873	104.519	127.833	121.305	121.746	246.769	228.417		198.5	189.769	179.077	228.583	224.042	204	212.077	226.083	191.667	201.538	140.124	136.519	140.99
103.144	102.01	102.391	106.073	104.775	107.166	127.938	120.555	122.522	258	217.833		185.923	201.364	191.273	226.812	216.367	205.94	207.615	209.154	200.231	193.333	137.319	136.785	141.098
102.593	102.256	102.344	103.47	105.645	107.688	126.595	121.334	123.288	245.417	224.5		203	186.077	167.583	225.292	218.635	201.942	212.462	215.077	205.615	205.636	137.466	137.648	141.419
104.141	104.513	102.855	104.569	104.434	106.691	127.827	122.024	121.472	265.167	243.75		209.25	183.692	180.167	228.5	220.135	206.146	217.083	224.917	205.231	206.917	138.127	136.53	139.406
102.152	101.409	102.868	105.098	105.633	107.196	127.637	120.427	122.88	236.308	228.667		202.818	187.231	181	228.667	220.962	199.38	222.333	210.462	196.692	209.083	138.09	140.454	139.562
102.052	101.862	102.643	105.013	105.465	108.287	127.042	120.115	121.558	255.75	230.917		197.333	180.462	173.75	232.021	217.712	213.354	218.846	204	195.538	219.583	136.545	139.009	139.266
103.048	99.4615	102.872	106.399	106.359	106.564	126.912	120.569	123.195	246.417	228		216.727	197.545	181.2	221.958	215.769	204.271	213.769	221.833	191.857	212.5	139.881	138.432	139.303
103.337	100.863	102.341	105.199	104.981	106.326	127.46	120.845	123.166	239.385	231.417		195	181.538	180.769	227.812	216.962	209.26	214.167	214.083	197.231	202.333	136.871	138.425	139.623
100.38	101.775	101.972	104.534	106.345	105.577	127.184	121.839	122.02	231.083	231.5		189.462	190	185.417	227.5	228.115	208.82	216.417	201.077	194.231	197.083	138.394	137.817	140.54
102.626	102.746	103.7	103.42	106.471	106.413	127.437	120.962	122.304	257.417	214.25		183.333	192.727	180.333	224.061	220.635	204.86	214.083	220.385	187	198.75	138.116	138.648	139.495
102.613	102.936	103.163	104.782	106.281	105.263	129.123	120.828	120.436	251.417	217.917		203.455	190.571	168.75	222.312	224.327	201.208	206.786	221.333	201.167	190.182	139.183	137.061	140.301
103.327	101.635	103.355	104.179	104.842	106.119	128.135	121.83	122.298	247	223		194.167	185.538	172.714	218.082	225.654	211.26	218.769	215.231	198.538	194.583	137.241	137.343	137.381
102.813	101.645	101.375	104.666	106.804	104.113	126.633	120.164	122.831	251.923	220.083		184	180.538	175.286	223.041	224.615	206.979	216.769	219.846	210.583	216.333	138.071	137.587	137.527
103.228	102.968	103.218	105.833	104.365	105.516	127.791	120.794	120.746	243.917	238.909		205.273	188.636	193.182	230.667	225.404	200.46	209.538	208.083	190.231	197.25	138.038	137.343	137.782
102.123	101.263	101.92	106.282	105.459	105.492	126.674	120.363	121.76	251.667	230.833		205.273	188.333	185.091	222.75	225.367	199.021	216.636	214.077	191.583	205.455	136.886	138.208	138.351
102.778	101.929	103.189	104.698	104.601	104.882	128.45	121.587	122.718	254.75	215.167		197.308	178.769	181.667	225.354	219.061	208.66	207.385	215.75	184.333	210.5	136.751	137.077	140.225
102.411	102.885	103.073	105.178	105.221	106.065	127.859	120.808	121.009	251.167	220.833		196.154	182.071	172.077	222.776	224.423	200.16	205.818	212.5	198.769	199.615	136.256	137.256	138.772
103.497	102.768	102.874	104.753	105.719	106.765	127.461	120.319	122.336	231.077	225.077		201.455	183.571	167.769	220.367	223.292	207.708	225.667	215.071	200.769	196.643	137.268	137.183	139.724
102.076	102.712	103.811	103.593	104.481	104.62	127.369	120.852	120.741	248.75	217.182		191.667	181.917	182.769	232.208	221.396	206.021	217.846	208.923	208.615	222.833	137.759	136.981	136.313
103.035	102.225	101.205	104.348	104.949	105.365	126.975	120.204	119.825	253.417	220		204.364	183.154	187.9	216.458	220.68	204.78	218.5	220.385	199.769	202.818	139.142	135.556	138.389
104.291	102.604	103.306	104.292	105.326	108.535	127.316	122.203	121.531	245.308	232.846		191.5	183.077	183.545	229.188	215.34	205.865	209.846	219	212.923	192	138.568	138.898	137.803
103.911	102.631	101.685	103.468	105.564	104.169	126.578	121.084	121.569	240.25	227.385		177.357	183.5	183.636	229.458	225.021	195.56	213.5	208	198.167	216.667	137.686	137.086	138.133
103.785	101.766	103.541	103.436	105.182	106.016	126.576	120.412	121.469	263	214.154		188.538	181.714	184.5	224.143	226.58	208.16	221.583	205.75	204.5	200.769	139.269	138.149	137.349
102.225	102.112	104.909	103.401	105.841	104.358	127.771	121.784	122.499	252.083	221.077		200.385	188.25	168	220.354	224.542	208.896	216.583	216.231	206.286	198.083	136.425	137.289	137.184
102.196	103.323	102.667	105.221	105.365	107.241	128.283	120.623	121.67	243.417	230.333		187.923	179.429	169.923	228.688	218.442	206.146	223.643	210.846	205.083	195.091	139.319	138.165	138.022
102.896	101.987	102.348	104.375	104.37	106.55	127.015	119.217	121.571	253.077	228		204.333	184.5	181.667	229.122	215.08	203.604	222.769	221.308	204.786	193.25	136.859	137.77	140.394
103.68	101.756	103.158	105.921	106.646	105.644	127.522	120.154	122.653	247.231	245.2		193.455	172.286	187.833	231.208	218.812	207.542	233.636	212.167	208.917	195.455	138.902	134.948	137.709
102.554	101.171	102.158	104.815	104.264	104.987	127.02	120.177	121.341	246.083	227.077		196.083	190.1	178.333	232.854	216.846	209.94	236	211.538	202.917	205.385	138.171	138.169	139.127
103.291	102.71	103.416	106.032	104.799	106.131	126.881	124.163	123.04	254.917	220.667		189.833	195.9	189.364	227.417	215.154	209.333	226.182	207.308	200.417	211.455	138.609	137.327	137.722
103.07	102.545	102.943	104.11	104.221	103.61	128.451	120.718	121.308	258.167	232.5		196.846	193.083	166.571	229.604	225.646	202.396	228.091	209.357	210.727	209.167	139.263	137.286	138.009
103.212	102.294	103.117	105.677	105.15	103.659	126.049	120.493	122.587	251.917	218.923		191.25	192.167	181.308	220.438	217.75	208.82	229.545	223.667	210.091	207	136.974	138.086	136.75
102.231	100.653	102.621	103.415	105.114	103.511	127.709	119.862	121.303	261.083	230.417		208.545	185.462	179.846	222.878	218	211.688	216.615	220.667	204.5	196.364	137.41	138.256	136.375
104.332	101.828	103.129	105.209	103.811	105.698	127.276	119.881	121.876	256.333	228.154		188.923	190.333	179.833	224.551	223.58	209	226.923	218.417	197.917	199.917	137.933	136.321	138.098
102.709	101.776	101.461	103.792	105.825	104.713	127.016	120.033	122.646	252.833	222.615		203.455	192.75	197.545	232.375	227.562	207.06	237	226.583	193.615	196.154	137.529	136.803	135.405
103.136	101.379	104.019	104.866	105.432	105.054	126.45	121.115	121.366	258	224.417		192	206.182	185.545	229.417	229.833	201.042	229.308	219.846	212.909	202	138.526	138.203	136.127
101.696	103.822	102.551	104.126	106.495	103.826	128.011	122.131	121.069	258.917	222.917		195.333	181.769	188.25	225.7	217.204	209.885	239	217.077	196.417	209.833	139.785	139.234	135.557
103.326	102.695	103.312	104.665	104.858	106.302	126.795	120.489	120.728	244.25	224.667		191.615	196.083	177.923	221.354	218.875	206.333	239.2	213.083	194.615	207.273	136.849	137.12	136.171
102.877	101.718	102.981	105.355	103.735	103.836	127.663	121.728	122.885	252.417	228.455		207.364	185.769	179.417	230.521	218.612	196.78	223.538	235.8	208.364	199.417	138.212	136.095	137.841
103.646	102.038	103.114	105.141	105.593	105.84	129.164	120.425	122.235	262.5	232.167		199.75	186.583	183.333	232.354	220.896	217.08	221.615	222.727	193.923	196.083	138.458	135.524	137.592
101.551	102.648	102.852	104.443	105.56	102.697	128.59	120.991	121.812	267.167	227.333		194.231	202.75	171.429	234.458	224.755	210.269	222.077	241	201.385	202.077	139.604	136.251	137.684
104.222	101.806	101.896	104.665	104.845	105.635	125.823	120.37	121.358	258.917	225.538		212.909	190.417	191.273	234.688	223.143	202.615	222.846	233.909	205.167	202.077	137.827	136.022	139.443
102.813	101.827	103.628	103.49	104.634	105.195	127.179	121.604	120.978	269.333	218.667		193.917	188.615	169.692	221.551	219.469	208.962	225	236.833	212.5	192.154	138.397	136.597	135.364
103.003	102.841	103.084	104.166	105.522	105.127	128.587	120.956	122.723	251.5	235.5		201.167	189.333	188.833	225.083	218.347	205.02	241.417	224.538	193.833	204	138.593	137.475	137.842
102.431	100.593	102.839	105.342	105.767	104.886	128.235	120.975	122.449	256.667	225.833		206.455	183.385	178.667	227.042	223.042	211.6	215.167	225	196.923	198.462	138.131	136.835	140.75
102.058	101.812	102.599	104.642	104.179	106.163	128.069	121.144	122.007	255.417	223.667		188.077	196	176.5	220.188	220.708	207.962	221.538	222.818	211	193.25	138.397	138.371	136.047
103.585	102.177	104.495	105.61	103.837	104.281	128.333	121.916	122.453	257.333	223.077		202.917	195.182	174.5	224.122	215.3	209.75	241	226.727	209.273	198.077	137.961	137.79	138.491
103.428	101.397	102.098	104.703	105.297	105.152	130.042	121.876	123.166	253.5	229.727		201.917	194.833	179.692	219.306	219.917	199.76	221.538	221	217.364	195.231	140.19	136.956	135.285
103.847	100.764	103.546	101.84	105.262	104.737	129.338	119.628	121.403	259.667	228.25		190.75	194.273	177.5	235.104	226.673	211.98	237.091	223.333	201.077	203.091	140.858	136.387	138.311
102.563	102.776	103.114	105.36	105.174	103.202	128.117	120.074	122.418	249.667	220.385		206.077	191.583	190.333	229.438	223.082	206.96	212.909	222.286	212.833	195.417	140.11	137.59	135.513
104.08	103.703	101.404	103.029	103.454	106.46	129.951	120.846	124.02	258.667	218		189.833	189.167	184.75	218.408	224.896	197.96	228.462	230.273	207	196.583	140.092	135.833	136.873
103.457	103.987	103.508	104.235	104.054	105.937	128.106	122.391	121.024	244.5	230		202.769	185.923	186.75	222.271	226.729	208.562	234.462	240.273	206.364	200.333	139.949	136.448	136.139
102.546	104.232	102.687	105.337	105.513	105.176	128.675	121.678	123.423	258.417	223.462		210.5	201.667	175.833	220.735	216.96	204.646	218.462	235	202.25	203	140.474	138.542	137.418
103.712	103.867	103.615	104.434	105.388	104.628	127.246	120.7	123.007	258.5	223.083		202.167	176.583	172.385	226.184	219.708	212.42	245.667	218.214	205.077	199.692	138.689	135.845	137.335
103.958	103.422	103.563	104.58	104.771	105.533	129.055	120.188	121.332	249.917	225.077		208.182	193.583	179.5	221.735	230.429	208.042	219.333	228.273	199.727	204.692	139.616	139.508	136.475
103.537	103.411	102.527	102.484	105.725	104.863	128.155	120.8	121.204	251.167	219.692		191.462	182.538	176	219.98	229.375	199.84	222.846	227.083	200.308	204.083	138.14	138.559	136.27
103.304	103.535	104.7	104.456	105.163	104.777	128.478	121.635	122.161	248.75	220.308		199.417	178.231	185.545	219.061	223.429	207.154	229.1	218.833	208.333	194	138.698	138.623	137.297
104.534	103.185	102.456	105.962	104.734	105.179	125.754	120.797	119.296	262.583	220.417		200.231	199.273	176.154	220.653	233.229	201.68	213.727	212.083	205	194	136.386	138.023	137.396
102.773	102.22	103.763	103.551	104.929	105.754	128.466	120.523	122.197	263.25	224.417		207	194.273	174.333	219.958	235.958	215.231	229.4	206	208.167	189.083	137.734	138.166	136.883
103.391	102.724	102.585	106.858	106.369	105.729	128.924	121.728	121.024	242.75	221.769		200	193.091	178.917	218.571	221.896	206.375	210.308	212.167	204.833	197.417	138.095	138.542	136.731
102.473	102.422	103.297	104.965	105.217	104.754	127.305	121.919	123.007	247.917	219.538		198.692	187.786	177.769	217.184	220.25	206.885	213.417	216.083	206.769	204.25	138.218	139.045	136.076
103.404	104.328	102.855	105.16	103.917	105.237	127.635	120.808	123.137	251.583	226.083		203	194.4	172.929	223.102	225.146	211.75	238.667	199.923	205.923	201	139.808	139.775	135.718
102.196	103.737	102.597	104.487	106.042	105.341	127.742	121.401	121.376	261.333	238.917		187.692	183.538	174.091	221.735	221.8	215.12	219.333	217.917	200.083	184.923	138.038	137.479	136.731
103.968	103.299	102.701	103.699	104.971	105.981	127.832	119.993	121.788	261.5	228.167		194.25	193.909	189.636	235.083	231.104	207.98	220.385	229.75	212.923	203.545	138.923	138.256	136.514
104.552	103.673	103.516	103.652	103.563	106.404	127.396	121.272	123.097	246.75	227.333		205.455	187	174.231	232.083	226.021	204	226.538	214.833	203.818	217.5	138.835	140.3	136.333
102.909	102.022	102.243	102.622	106.155	105.035	127.781	122.896	121.356	247.417	219.167		210.25	191.667	184.583	219.143	220.312	204.577	233.333	227	207.455	190.083	139.215	139.771	135.509
101.918	104.487	103.772	103.513	104.22	106.214	129.093	121.259	123	256.5	227.917		211	179.538	182.1	223.125	222.167	207.562	229.167	218.182	200.091	201.083	136.525	138.435	137.075
103.703	103.672	104.356	105.849	105.207	107.522	129.104	121.668	120.843	254.583	230.462		191.583	182.462	181.929	224.306	233.375	205.385	232.923	207.75	211.75	205	139.633	138.978	137.554
102.486	102.096	103.164	104.854	106.438	106.725	127.418	121.04	122.7	241.308	236.417		202.364	179.929	184.667	222.612	219.396	207.08	242.083	223.083	205.308	201.417	139.135	139.392	136.867
103.272	102.433	102.899	104.81	103.959	107.281	129.031	121.662	121.898	251.833	222.583		205.75	188.455	174.462	219.878	217.531	210.423	232.917	219	205	192.071	138.611	137.93	136.142
103.492	103.16	103.82	103.581	104.591	107.158	126.922	121.474	120.602	262.583	227.385		209.182	191.364	162.769	224.571	227.167	204.438	251.25	229.25	203.615	200.923	138.61	138.646	136.085
103.365	103.138	103.95	106.125	104.277	104.374	127.272	121.23	123.482	249.333	234.583		196.538	189.818	171.154	220.959	233.458	211.12	235.692	216.286	208.917	202.308	141.257	139.107	136.212
105.099	103.442	102.262	104.112	106.15	105.311	128.083	122.197	122.157	265	239.75		200.923	181.846	177.643	230.188	228.417	203.865	244.167	226.5	202	211.75	139.051	137.829	134.369
101.25	104.756	102.41	104.934	105.305	105.339	127.754	121.302	121.962	259.25	231.75		201.273	179.538	175.083	228.583	230.125	215.16	242.833	221	211.538	209.5	140.222	137.577	134.538
103.135	103.852	101.997	103.74	106.371	105.687	127.675	121.079	123.45	240.333	233.5		194.364	176.462	181.667	219.583	227.583	207.269	236.167	230.417	210.769	191.5	138.254	137.284	134.776
103.201	104.122	102.759	103.446	104.256	106.192	128.338	121.929	122.316	245.167	230.417		205.455	190.1	177.5	220.229	222.857	204.688	236.333	213.786	203.5	213	138.266	139.136	135.537
103.611	102.754	102.536	105.093	106.661	107.386	128.72	120.394	122.035	260.167	239		207	194	177.667	222.604	218.083	209.654	232.083	223.917	208.083	204.083	136.365	138.668	134.696
104.64	104.099	101.858	103.468	104.971	105.121	128.608	120.664	121.679	243.667	220		192.143	190.583	172.571	232.479	216.878	208.714	226.667	217.231	213.833	209.917	138.551	138.933	133.196
102.72	104.634	102.773	104.044	105.444	107.155	128.816	122.217	121.973	259.667	237.667		205.455	189.455	186.333	230.673	223.896	206.26	219.286	209.083	199.727	201.917	140.321	137.183	135.438
104.691	103.867	102.536	104.574	104.028	103.723	129.445	121.055	120.131	263.917	218		193	197.455	175.333	228.604	224.51	215	233	209.071	201.417	182.769	140.371	136.422	133.851
104.111	103.427	103.825	104.205	104.555	107.471	128.28	120.887	120.617	250.583	212.308		201.909	190.2	179.071	227.041	219.102	211.75	231.923	203.5	197.083	203.833	140.241	137.1	137.402
102.936	104.26	102.801	104.304	105.324	104.557	130.19	121.528	120.551	244.75	220		209.818	188.727	175.769	219.208	217.583	201.923	242.417	212.417	214.167	213	140.473	138.749	134.073
103.067	104.478	104.847	102.283	106.302	106.333	129.497	120.836	122.376	252.083	244.333		197.5	197.833	188.818	217.854	224.571	205.038	227.583	200.571	189.846	202.909	141.219	138.105	133.826
102.618	103.372	103.855	105.189	104.867	107.022	127.791	120.242	123.248	242.083	231.583		216.182	182.769	181	225.939	225.163	206.75	232.75	205.333	211.917	205	137.819	137.066	134.141
103.102	103.362	102.669	103.918	104.803	108.103	130.705	120.931	120.912	269.917	234.083		189.462	178.833	178.7	226.771	225.667	207	225.25	204.091	206.167	210.917	139.721	136.361	133.064
102.109	104.346	103.222	104.236	104.946	105.199	128.916	121.866	120.934	270.167	226.667		193.538	191.4	175.429	227.167	221.812	209.36	219.333	215.167	208.75	202.1	140.79	136.016	134.218
103.147	103.776	101.562	103.147	106.183	105.958	127.969	122.431	120.736	269.667	231.385		199.909	184.231	180.167	222.918	221.271	202.865	233.25	218.25	204.25	192.286	139.36	135.721	135.142
103.208	103.521	103.736	104.801	105.857	104.782	127.796	123.19	121.069	272.5	245.083		199.5	182.333	169.818	222.51	218.519	209.34	225.545	205.667	200.5	185.077	138.438	135.689	135.358
102.329	102.125	103.248	103.423	105.79	105.955	129.06	122.358	120.429	264.75	247.333		207.273	183.667	180	222.042	228.959	211.3	216.417	219.5	202.692	192.538	136.479	136.079	134.853
103.987	104.7	103.326	103.927	104.978	106.922	127.777	121.102	120.628	265.75	237.75		202.25	190.273	170.833	232.729	216.788	217.521	244.8	224.833	197.571	210.273	139.038	140.07	137.411
102.968	104.061	102.085	102.952	105.115	104.75	129.22	120.648	120.721	255	237.833		212.273	178.692	174.077	233.396	228.062	206.771	231.3	220.923	201.615	190.538	139.47	138.822	136.749
103.482	103.619	102.093	105.553	105.459	106.09	128.358	122.195	120.987	249.333	240		200.667	195.583	191.182	227.188	216.24	205.942	208.769	224.333	204.182	198.154	138.532	139.152	135.171
104.08	102.7	103.17	104.071	105.048	106.035	128.374	120.867	121.522	269.25	239.833		196.75	190.833	177.692	224.796	223.36	209.22	228.364	209.929	181.538	204.833	138.11	137.099	134.604
105.15	103.051	102.262	103.858	102.937	107.095	129.182	120.682	120.25	279.583	249.75		201.25	186.833	176.75	226.163	227.24	205.558	223.769	217.167	195.692	206.917	137.295	136.147	135.558
102.395	105.09	104.898	103	105.528	105.189	127.767	122.145	120.372	267.083	229.75		202.727	188.75	179.154	235.688	220.654	210.66	223.727	210.333	195.333	204.273	138.452	137.829	133.285
103.697	105.102	104.025	104.093	104.58	105.971	128.59	121.626	122.611	261.083	235.25		207.818	186.308	185.182	229.551	223.72	208.577	221	215	189.154	194.857	138.432	137.54	134.88
103.506	105.08	102.47	101.581	104.117	106.206	129.172	121.748	121.25	256.833	235.5		192.154	184.357	172.214	230.083	222.56	199	216.846	199.643	206.273	189.692	138.625	136.594	134.93
104.271	102.862	104.436	105.361	102.917	106.987	130.524	120.403	120.257	268.75	223.692		199.909	192.091	190.417	232.771	230.521	204.885	220.167	203.071	194.75	203.5	139.526	136.26	133.962
103.01	103.298	102.811	103.229	105.343	107.33	127.663	121.383	119.681	261.917	233.917		208.364	194.833	187	234.875	227.458	204.404	208.833	231.917	197.846	210	138.183	138.074	134.231
103.71	101.498	103.204	104.385	102.571	106.087	128.571	121.748	120.312	255.583	244		211.5	195.455	185.5	226.792	221.22	208.25	224.231	211.333	192.786	205.273	136.619	137.509	132.812
103.476	104.309	103.712	104.885	105.595	105.798	128.777	120.774	120.858	251.75	243.5		207.083	187.923	179.917	236.438	222.3	205.44	220.917	213.286	211.833	195.636	138.513	137.575	134.497
105.538	103.971	102.916	104.385	104.166	105.193	129.527	120.7	120.597	256.154	228.083		207.846	186.917	176.077	229.042	225.5	202.423	230.182	220.333	199.5	206.091	138.647	139.189	134.674
104.811	103.283	102.082	103.557	105.756	104.597	127.244	121.279	120.976	250.333	234.583		207.667	197.5	183.5	231.208	224.18	206.808	226.462	234.455	204.583	195.917	137.609	136.369	136.321
105.185	104.013	103.937	103.975	106.197	106.934	127.679	121.035	121.201	245.692	252.083		204.333	186.769	185.5	228.833	224.44	211.827	236.909	227.273	208.182	203.417	134.888	135.925	134.459
104.46	103.747	102.697	104.356	106.974	107.594	127.644	122.881	121.403	259.333	228.692		192.846	199.909	180.615	227.188	225.96	210.02	228.091	232.077	202.917	212.75	136.215	136.041	132.649
102.511	103.358	103.521	104.387	105.83	107.022	127.73	121.913	121.04	262.833	245.167		214.818	193.091	175.167	233.333	218.16	204.571	222.818	228.417	208.727	214.154	136.205	136.67	134.83
103.924	102.917	103.902	103.932	105.393	105.622	128.902	121.834	121.73	256.417	231.692		188.917	192	182.833	226.333	232.56	214.354	229.455	233.727	205.833	197.917	137.035	137.667	132.063
102.64	102.17	101.849	104.701	104.702	104.614	128.852	120.906	121.593	251.692	239.167		210.667	182.923	172.5	227.417	229.021	208.938	225.538	221	198.818	191.308	135.26	137.594	134.58
104.404	102.683	102.625	105.353	106.69	104.467	127.062	121.579	121.414	249.923	240.25		207.364	181.077	176.083	227.542	228.12	205.208	216	244.5	205.636	207.364	135.737	138.109	133.696
103.682	102.109	104.035	105.475	106.455	105.881	127.887	119.509	121.808	254	244.417		198.286	195.364	190.083	224.104	225.88	203.28	212.071	234.25	207.667	214.182	137.154	136.308	132.788
104.946	103.857	103.92	104.114	105.384	105.525	128.318	121.931	121.137	243.75	225.538		192.667	196.333	180.083	227.312	226.08	202.923	233.308	220.667	211.333	212.25	136.106	138.92	134.228
102.249	102.843	102.003	104.757	105.532	105.672	129.305	122.687	120.989	256.5	236.5		206.5	192.077	176.833	222.604	229.96	209.846	233.429	220.545	205.818	203.167	137.448	137.581	134.319
104.7	103.163	104.019	104.213	103.997	107.152	129.119	121.471	122.06	258.25	244.75		195.833	180.154	179.909	235.562	221.5	209.229	242.4	226	219	201.083	135.545	137.804	134.108
103.176	104.076	101.946	104.594	106.675	105.206	129.004	122.978	122.332	269.917	225.75		208.583	185.692	180.5	226.625	225.2	201.577	245.1	222.308	205.364	201.154	137.186	135.342	135.49
104.933	102.755	103.158	103.406	105.746	106.246	127.883	122.333	121.418	264.667	230.75		199.583	180.692	172	225.354	224.75	208.673	223.231	222.091	207.917	201.667	136.792	136.453	135.858
104.332	103.247	102.748	105.574	104.304	105.785	128.122	121.691	120.794	257.083	217.154		202.333	186.167	178.333	223.792	223.54	202.327	235	234.5	210.333	216.273	136.468	138.278	134.927
102.875	102.689	104.357	102.87	105.613	104.829	129.095	121.358	121.611	265.25	226.154		204.545	186.692	168.923	229.312	225.7	204.312	218.769	223.667	215.182	210.385	136.429	137.772	135.125
105.112	103.287	103.468	104.169	105.51	106.14	127.697	121.343	122.097	257	227.846		196.667	181.385	178.083	228.041	222.938	200.96	224.636	225.769	217	203.727	137.779	137.618	133.589
102.84	102.045	103.975	105.857	104.525	106.175	129.106	120.721	122.237	254.167	235.917		192.154	187.273	170.917	219.771	226.36	206.577	237.167	220.308	214.667	209.273	137.753	137.622	134.263
102.01	101.965	103.388	105.364	103.397	106.425	128.812	121.628	121.285	259.083	232.25		199.154	178.308	172.5	220.48	219.354	205.1	227	218	208.833	199.75	136.147	136.978	135.323
103.511	102.093	102.904	103.865	105.025	104.854	127.748	121.328	121.311	248.25	230.833		199.545	175.385	179.364	219.16	219.51	212.333	229.308	220.833	203.364	200.273	135.378	135.943	135.089
104.661	103.212	103.029	105.118	103.68	104.924	129.588	120.761	121.449	250.25	230.083		199.75	198.545	181.25	222.396	216.346	208.375	240.1	225.833	217.25	210.917	137.221	137.197	136.807
102.668	102.545	103.887	103.871	104.987	105.061	128.276	121.624	121.135	250.083	242.167		188.769	185.75	177	228.812	218.102	204.308	222.462	219.583	206.636	211.273	134.535	136.807	135.394
104.417	103.244	102.773	104.152	105.368	104.356	128.544	122.192	123.204	259.75	232.083		203.333	177.769	179.583	226.062	223	206.854	234.4	210.636	220	203.273	137.861	137.301	137.13
103.548	102.57	103.406	103.61	105.054	104.176	128.752	120.711	123.294	250.083	232.083		210.417	184.077	171.25	231.812	222.5	208.827	222.308	223.167	194.077	210.75	137.035	137.396	134.348
102.974	101.538	103.812	103.208	105.361	105.022	128.712	120.458	121.011	264.667	233.417		202.273	204.182	168.692	228.125	224.5	201	221.154	226.333	200.5	213.083	136.465	138.199	135.3
102.703	102.74	102.118	105.766	106.192	105.997	127.881	122.409	120.871	258.833	232.364		210.909	183.917	181.833	222.54	214.692	212.5	218.75	223.833	215.417	219.545	139.635	137.522	132.772
103.284	103.318	102.236	104.853	104.811	103.755	128.962	123.026	121.987	266.25	225.923		185.538	180.917	168.071	225.646	220.245	207.346	226.538	211.692	213.273	205.333	138.876	138.642	133.465
103.474	103.006	104.101	105.354	106.847	104	128.966	122.836	121.527	249.833	219.923		199.5	182.364	183.417	223.062	219.755	204.788	220.308	231.917	213.909	191.615	139.225	137.38	136.206
104.141	102.478	102.924	104.514	104.077	105.356	127.465	120.732	122.676	268	227		192.923	190.583	182.364	224.429	220.135	205.346	219.929	223.75	198.917	210.818	137.268	138.058	136.114
103.609	103.449	103.401	103.965	105.78	105.623	129.033	121.541	121.04	256	254		198.833	179.583	189.182	221.46	228.154	205.481	210.769	213	216.462	196.364	136.6	137.364	134.391
103.661	102.369	102.338	104.294	105.712	104.576	128.989	121.85	120.89	252	229.077		198.5	185.25	173.75	219.959	223.308	206.346	229.538	224.75	208.417	194.364	136.16	135.352	133.585
104.466	103.558	102.332	104.158	106.035	106.343	129.372	120.913	122.639	275	219.923		208.545	191	182.5	223.792	224.404	206.115	222.818	231.583	221.667	210.667	136.497	134.968	135.244
103.618	103.824	102.107	103.913	103.896	104.716	130.367	122.542	121.381	259	226.077		207.364	191.583	179.4	226.51	222.5	208.942	227.083	224.538	198.769	205.5	137.271	135.733	133.547
103.858	103.099	102.846	105.942	105.339	105.228	130.6	122.29	121.013	252.833	231.846		198.545	198.25	182.917	218.708	219.385	199.962	232.923	214.75	217.538	203.615	135.753	136.614	134.635
103.167	102.642	103.435	105.487	104.513	106.131	129.934	121.263	122.714	259.333	251.8		196.091	177.833	175.909	224.688	227.846	206.769	222.727	234.583	206.083	195.75	136.382	135.241	133.991
103.934	103.541	103.506	105.396	105.022	105.67	129.413	122.662	122.37	266.667	222		200.917	188.636	177	233	226.615	210.096	215.5	210.917	203.308	200.091	136.877	136.845	131.911
103.297	103.348	103.147	105.34	105.847	104.864	130.441	121.202	122.948	251	229.909		204.545	181.929	171.923	222.102	220.769	212.438	219.083	232.727	204.667	210.154	139.095	136.923	133.342
105.59	103.799	102.845	104.693	106.552	104.344	131.108	122.316	121.102	260.833	242.727		197.077	195.364	179.583	228.458	219.75	206.173	225.071	215.786	211.75	201.692	138.063	136.108	134.189
103.224	104.74	102.879	104.408	105.032	105.123	128.789	121.562	120.821	259.917	227.308		199.636	192.667	169.462	228.958	228.981	204.346	234.333	222.333	207.75	187.154	138.47	135.006	134.224
102.028	104.111	103.016	104.41	104.775	105.991	130.164	120.978	122.08	274.417	241.364		200.818	192.154	180.25	227.833	219.577	211.62	221.167	216.833	205.417	181.727	136.74	137.173	136.158
102.309	104.146	103.587	105.328	104.519	104.154	129.086	121.346	121.687	245.538	239.8		198.667	189.333	184.636	228.792	220.25	209.788	233	216.846	203.357	198.154	137.477	137.321	133.503
102.604	103.619	102	106.413	102.821	107.535	130.249	121.197	122.497	261.833	255.4		205.636	190.273	160.083	222.75	220.327	201.827	216.786	221.417	211.364	195.077	137.829	137.152	135.175
102.891	102.849	104.006	105.748	104.781	105.019	128.91	121.066	121.384	264	235.273		198.455	196.917	180.417	222.521	218.654	208.519	224.917	224.071	209.091	215.273	139.231	136.708	133.329
104.597	103.561	102.735	105.148	104.154	104.675	130.655	121.734	122.265	268.333	228.083		208.167	190.2	164.538	223.837	223.404	200.146	213.231	218.636	220.833	204.909	139	136.475	135.977
104.195	103.308	103.785	105.901	105.306	104.703	129.358	122.206	122.135	262.083	225.923		205.818	187.083	176.643	228.694	220.788	208.115	212.462	212.417	201.25	210.636	137.157	136.256	134.374
103.933	102.567	104.006	104.031	106.367	104.479	130.06	121.872	120.456	263.75	224.909		195.385	197.182	169.071	220.06	222.885	207.34	219.615	211.818	209.308	201.455	137.026	134.171	134.352
103.594	102.926	102.401	106.144	106.393	107.094	131.472	122.841	121.565	272.083	237.273		207.917	190.75	172.143	229.292	215.827	204.76	224	212.25	213.417	207.909	138.272	133.854	133.429
104.179	102.891	101.669	104.679	104.55	105.094	130.177	121.285	121.88	262.385	236.308		201.417	188	178.75	215.94	222.673	204.25	222.417	220.417	208.25	193.818	138.612	136.672	135.684
103.422	102.959	103.016	104.554	104.318	105.32	130.077	120.753	121.637	247.667	220.308		201.333	192.909	172.5	220.417	221.538	206.46	230.833	222.167	203.75	204.083	135.997	136.371	135.619
102.128	104.092	102.577	105.688	103.731	104.702	130.104	122.069	121.61	282	230.364		201.75	200.455	183.417	225.755	223.308	207.192	226.231	212.083	217.333	189	139.392	136.225	134.286
104.134	102.026	103.722	105.468	106.294	104.663	130.954	122.266	122.055	260.417	224.538		208.182	187.786	175.308	231.146	226.231	205.731	225.917	230.273	210.583	200.545	138.888	135.927	134.763
102.939	103.247	101.164	104.92	105.471	106.735	129.996	121.374	121.825	258	249.818		191.583	198.083	172.167	223.125	220.212	202.135	212.643	216.846	216.25	213.417	137.417	135.34	136.307
103.288	105.926	103.483	103.83	106.218	106.67	128.349	121.148	122.115	264.75	243.5		193.692	189.917	184.25	220.531	220.769	207.923	219	216.417	211.25	216.083	139.533	135.93	135.232
103.454	102.772	102.685	105.655	104.809	105.003	131.347	121.985	121.168	258.833	250.5		201.917	203.5	185.833	219.68	218.327	209.354	209.643	205.714	218.273	210	137.361	138.401	135.38
102.505	103.943	100.971	104.753	106.676	105.599	130.732	122.454	121.769	259.846	235.308		195.273	192.818	179.923	224.245	218.885	212.94	221.5	218.5	214.25	204.727	139.905	137.361	134.899
103.875	103.309	103.625	105.316	104.274	104.363	130.212	121.038	120.456	250.846	233.077		203.667	198.455	170.615	216.041	227.096	212.692	228.667	214.462	210.364	215.25	137.919	136.74	136.696
104	103.077	102.258	104.327	105.418	105.76	130.091	120.843	121.747	255.923	237.455		208.917	190.091	183.714	210.788	216.9	216.75	223.667	208.667	209.583	205	139.126	136.535	136.111
102.575	104.663	102.871	103.416	105.551	106.43	130.272	121.794	122.444	253.846	236.5		201.167	203.917	175.923	214.019	220.269	205.25	210.429	215.917	204.167	212.667	139.539	136.313	135.013
103.118	103.631	102.565	103.498	103.837	104.921	130.797	121.947	123.608	253.417	238.818		197.615	187.455	180.583	225.92	228.62	210.88	232.6	200.75	201.333	213.091	138.527	138.128	137.203
104.227	101.859	102.24	104.59	104.959	103.388	129.832	120.87	121.071	263.538	238.636		196	186.083	179.462	221.36	217.385	202.06	224.231	232.6	201.25	212.083	137.902	136.968	137.003
102.135	103.458	102.775	104.096	103.975	105.144	131.526	121.839	121.143	278.6	227.231		195.455	193.455	187.083	216.4	224.08	209.66	219.833	223	205.727	210.583	138.542	135.686	135.679
102.837	103.016	102.23	105.144	105.893	104.816	130.533	121.164	120.998	253.167	239.818		205.167	190.417	175.923	223.54	231.404	212.24	213	213.833	193.769	212.636	136.397	136.564	135.576
104.061	103.483	101.554	104.009	104.169	105.681	130.717	122.577	122.874	262.75	228.083		196.769	185	176.308	226.939	223.904	212.2	221.25	219.538	219.364	216.333	139.255	136.099	135.59
104.401	102.157	103.013	105.997	105.99	105.17	130.11	122.17	120.437	277.6	232.077		205.25	190.385	177.929	229.92	227.596	208.62	224.364	219.167	203.091	203.545	139.744	137.051	135.196
102.157	101.26	101.713	104.259	106.274	106.481	129.279	121.534	123.849	242.583	220.25		200.75	199.091	185.846	226.312	219.654	205.88	220.091	232.692	224.214	193.154	140.413	135.124	135.418
103.292	103.077	103.051	104.266	107.127	107.086	131.104	122.445	121.909	259.667	226.692		208.5	180.083	168.538	220.22	223.673	213.042	217.909	215.923	208.846	203.167	141.813	135.01	135.635
103.564	102.571	101.952	102.775	105.549	106.151	129.427	122.046	121.896	268.6	236.091		200.25	197.417	178.917	224.64	225.347	206.78	228.583	228.833	212.083	217	141.735	137.622	135.984
103.506	102.808	102.615	102.858	104.157	106.589	130.827	121.095	122.808	249	229.417		198.25	185.091	179.786	233.28	218.596	206.5	217.667	219.917	209.333	197.091	138.898	137.362	136.165
104.574	103.588	101.361	103.585	104.269	105.735	130.002	121.996	121.451	249.5	231.545		198.417	188.462	182	228.312	224.96	208.333	225	222.167	202.333	203.917	140.208	137.487	135.316
104.048	103.769	101.849	105.051	103.984	105.942	129.384	122.195	121.678	253.231	217.385		193.083	184.833	188.583	231.04	226.898	204.712	221.75	221.333	212.417	209.167	140.068	136.924	135.801
104.09	103.489	100.356	105.218	104.344	105.561	129.883	123.128	122.938	250.154	238.846		185.5	184.154	176.5	220.54	229.558	211.72	211.429	230.417	214.545	209.846	140.082	136.573	136.688
104.179	103.834	102.416	105.744	105.415	105.231	129.638	121.154	121.09	251.25	222.923		205	190.818	180.615	229.84	230.52	211.48	211	222.833	227.9	200.364	141.606	137.474	133.175
104.304	101.831	103.55	107.057	105.286	105.06	129.029	120.407	122.771	256.25	218.5		194.5	186.818	179.615	226.52	227.62	216.062	224.667	224.75	213.583	200.333	140.455	137.81	135.491
103.599	103.057	102.723	105.706	105.68	105.633	130.524	120.637	122.759	249.167	220.182		192.846	196.636	179	224.86	229.735	207.32	226.25	228.75	214.5	193.333	139.539	135.418	135.752
103.301	103.401	104.016	106.717	105.401	105.491	129.015	121.781	122.757	260.083	223		198.5	185.182	174.769	226.3	228.423	204.48	229.583	215.333	204.091	202.154	142.474	135.728	135.768
102.817	105.051	103.212	104.703	105.754	105.883	129.408	120.606	120.9	245.231	225		189.167	191.091	178.182	222.04	220.981	207.96	206.667	227.667	226.167	192.308	141.132	136.896	134.748
102.24	102.087	102.445	103.724	106.096	104.54	130.643	120.879	122.969	245.462	239.917		188.667	187.25	183.727	221.12	226.92	206.731	218.909	213.667	207.182	200.818	141.159	137.429	136.769
103.794	102.571	101.794	105.567	104.338	106.482	130.503	120.644	123.504	257.833	232.833		189.385	182.077	179.154	223.08	226.72	206.92	227.75	225.083	217	202	139.625	136.321	135.505
102.695	103.888	102.707	106.574	107.093	104.747	130.336	121.819	122.626	260	235.833		192.417	195.364	183.769	225.64	227.52	215.94	221.154	216.385	216.667	207.545	138.319	136.416	134.854
103.514	104.313	102.882	105.041	106.696	106.408	129.278	121.501	122.511	249.5	228.167		191.917	189.727	174.231	225.9	223.92	198.692	208.231	223.091	209.75	205.333	140.971	138.349	135.706
104.317	103.128	104.407	105.599	106.75	105.766	129.064	121.018	122.872	242.615	220		198	188.583	184.5	218.12	227.38	214.12	209.769	221.25	208.636	196.462	139.955	135.822	134.253
103.051	103.466	103.464	104.56	105.291	106.99	129.738	120.493	121.748	269.25	220.917		194.333	199.417	171.929	215.385	228.062	210.38	212.429	237.182	207.417	207	138.798	137.577	136.725
102.911	103.427	103.623	105.064	105.718	107.269	130.086	122.567	122.031	261.5	216.75		187.75	184.769	178.667	224.14	231.2	212.2	207.833	227.545	210.571	219.455	140.835	138.324	134.554
102.644	102.679	100.915	104.146	105.951	105.502	128.071	120.989	123.278	253	223.583		198.692	184.182	179.833	220.077	232.4	208.5	213.083	229.385	226.727	214.917	140.244	138.585	135.284
104.16	103.341	103.363	103.732	105.904	104.75	128.473	121.94	123.068	254.333	230.667		196.167	180.077	180.167	217.82	229.14	211.54	222.167	222.333	202.545	210.083	140.391	138.241	135.82
103.367	104.491	103.334	104.248	104.869	104.824	130.266	121.465	123.498	255.333	223.333		187.833	197.182	183.154	226.04	229.38	216.98	223.583	214.833	213.917	199.923	140.19	137.238	137.25
102.505	102.856	102.691	105.103	106.351	104.314	129.637	120.809	122.969	252.5	229.154		197	194.455	187.692	220.981	229.78	214.08	213.917	221.167	217.75	205.083	140.333	137.06	135.666
102.003	102.173	102.94	104.8	105.253	106.994	128.636	121.672	121.086	254.846	236.083		193.5	183.846	182.667	225.9	232.6	215.667	214.833	216.667	215.727	214.917	141.456	138.21	135.01
104.019	102.92	103.262	104.403	105.455	105.465	131.088	121.296	123.739	251.667	220		186.083	192.167	180.583	220.442	226.04	212.34	222.25	236.5	215.083	213.182	141.734	138.57	136
102.524	102.647	102.574	105.603	103.844	104.889	129.466	121.752	122.768	256.667	211		195.833	196.167	183.462	221.5	226.1	210.94	227.667	213.167	206.833	205.182	141.877	137.467	136.315
102.821	104.063	103.94	104.144	104.442	105.671	128.797	120.819	121.58	250.25	229.083		186.083	186.667	186.75	216.442	231.86	206.98	212.769	222.167	211.091	209.091	140.37	137.788	137.312
102.16	104.013	103.429	101.826	104.448	105.135	129.075	121.522	122.254	245.538	231.692		190.5	196.364	172	222.481	230.729	217.5	228.583	220.25	211.167	201.692	141.013	139.07	137.367
102.276	103.452	103.315	105.028	104.448	106.28	129.123	121.542	122.597	241.583	235.167		193.231	202.364	176.286	219.192	217.408	214.18	234.583	223	215.333	198.583	141.725	138.229	137.702
102.38	104.353	102.155	104.574	105.532	107.193	127.086	121.93	123.604	252.583	229.154		195.154	198.333	186.182	220.577	224.583	206.077	237.333	240.2	210.833	217.091	140.91	139.114	137.227
103.807	103.756	103.577	106.215	106.019	104.705	129.088	122.478	122.914	240.308	229.385		188.583	190	179.714	216.808	223.365	217.24	216.857	224	212.083	202.833	142.356	136.042	136.773
105.203	104.534	103.525	103.117	105.687	105.121	129.2	120.678	122.852	249	223.583		196.25	195	175.538	217.75	223.854	214.14	216.75	222.417	210.25	218.364	142.873	136.343	137.661
102.961	102.92	103.08	103.438	105.975	105.506	130.164	120.396	123.469	258.667	230.692		199.923	198.636	177.5	220.75	223.837	215.14	241.5	220.583	221	198.583	141.433	136.766	136.68
103.161	102.362	104.096	105.94	105.78	105.099	127.589	121.622	123.011	262.615	230		199.538	199.9	181.583	217.269	226.28	206.077	213.286	217.846	204.25	213.833	142.84	138.705	138.37
103.022	103.942	101.397	104.718	104.047	105.603	129.188	120.555	122.293	258.583	229.308		195.769	197.167	182.615	218.16	222.769	209.038	223.308	217.417	214.429	207	142.837	136.811	138.096
103.447	103.263	101.174	103.794	105.674	107.013	128.546	121.761	122.184	260	233.846		197.308	194.455	178.357	224.49	222.769	213.36	216.071	212.833	219.818	194.308	142.558	137.514	137.974
102.304	104.146	102.907	104.308	104.142	105.291	129.132	121.084	123.14	251.167	230.917		215	202.417	184.077	217.192	226.082	212.042	234.167	216.417	213	196.917	142.038	137.386	136.519
102.735	102.66	102.879	103.073	104.997	104.571	128.062	121.288	122.816	258.333	223.923		208.8	196.273	190.75	221	221.735	208.808	226.929	238.9	205.25	198.667	143.558	138.266	138.167
103.492	101.99	101.571	105.171	107.435	105.875	129.766	121.088	122.904	243.462	236.455		194.308	181.75	187.417	217.558	224.135	214.76	226.692	203.25	228.769	207.333	144.177	138.041	135.997
103.518	103.794	101.785	104.283	106.491	104.978	128.888	121.709	121.894	264.25	252.3		212.4	188.231	186.417	210.731	232.26	210.66	231.75	215.273	206.75	201.455	142.394	137.422	136.192
103.548	101.737	102.116	106.057	106.774	107.37	128.71	120.263	123.982	254.083	240.833		212.4	194.5	177.462	217.865	227.604	215.04	229.75	224.273	210.75	196.333	142.858	138.301	138.833
101.707	102.679	104.233	103.76	104.866	105.997	128.83	122.667	123.916	264.182	233.667		213.4	196.818	187.917	214.692	225.083	205.346	234.385	226.909	219.917	191.167	143.455	140.241	136.535
102.594	103.34	102.666	105.016	106.839	104.196	127.615	122.615	123.487	246.417	225.692		197.538	201.182	184.769	208.673	220.846	205.731	217.077	231.909	204.154	202.25	140.139	137.016	136.587
100.813	102.391	102.981	105.6	104.925	104.39	129.468	122.223	123.029	236.538	229.923		191.083	191.818	190.5	214.712	223	209.212	258.3	223	236.727	206.917	143.696	136.503	137.846
101.737	102.404	101.62	104.532	104.972	103.835	128.699	122.228	123.093	255.333	234.923		212.2	189.333	184.231	220.115	219.865	203.654	263.667	241.8	222.25	195.231	142.658	137.533	135.692
103.702	103.161	102.05	105.195	105	105.141	128.439	122.146	122.197	251.692	243.2		187.231	185.429	185.833	213.75	219.192	199.635	244.727	211.615	220.714	199	143.07	137.813	134.567
103.78	102.971	103.83	105.129	105.096	104.61	129.562	122.784	121.564	264.818	239.273		186.308	192	178.462	217.962	222.846	208.654	239.273	206.5	196.286	205.75	143.044	139.111	137.657
103.687	101.644	102.962	105.544	103.892	103.592	128.701	122.204	123.225	275.9	230.462		190	187.929	175.143	209.692	217.712	211.36	231.833	208.364	220.25	210.667	143.104	138.914	136.073
101.783	103.649	103.627	104.249	104.497	105.16	128.923	121.662	122.902	249.25	227		188.154	191.615	177.538	224.115	223.923	207.769	225.692	210.167	216.083	203.333	143.37	138.333	136.901
102.599	103.112	102.559	105.861	106.702	104.119	130.283	120.23	123.144	269.6	222		189.75	185.231	176.077	217.731	221.077	208.269	251.4	212.364	209	200.25	145.058	136.943	137.263
102.032	103.255	103.268	102.952	105.777	105.733	128.664	121.084	122.372	270.4	228.273		187.308	198	177.583	224.34	219.25	203.96	215.462	248.7	215.167	204.769	143.763	138.86	136.821
102.401	104.423	103.54	105.247	105.968	105.476	130.414	120.326	122.448	268.167	229.692		181	193.667	181.692	214.423	229.08	202.385	243.75	222.231	214.417	209.167	142.899	138.953	135.434
104.127	103.463	101.875	105.567	106.394	106.31	127.732	120.725	121.878	240.846	230.308		186.231	191.455	184.364	215.731	221.9	205.36	227.615	220.273	207.929	203.5	143.627	137.156	135.358
102.366	103.604	102.789	104.522	105.016	105.702	129.091	121.406	123.376	279.8	218.692		201.182	189.583	189.583	214.531	225.615	202.115	225.615	241.4	218.5	195.583	142.59	139.251	137.115
103.006	103.153	103.038	106.115	103.57	106.104	130.268	120.755	124.135	252.462	235.833		181.231	189.615	193.545	220.367	218.846	205.2	244.083	214.833	214.583	198.167	141.497	137.359	137.712
103.741	102.681	102.19	106.195	104.315	104.311	130.109	121.645	123.481	249.923	248.6		201.5	198.818	192.462	214.827	224.75	207.038	225.917	205.667	226.333	203.833	140.139	138.489	135.955
103.032	101.85	103.7	104.244	104.332	106.051	128.402	122.563	123.476	273.3	227		197.615	187.154	185.385	222.388	222.74	206.48	226.538	240.545	211.667	212.545	142.142	138.636	136.165
101.975	103.808	103.707	105.315	105.272	105.353	128.808	122.132	123.004	276	241.083		179.692	189.417	177.154	221.923	226.38	206.82	213.923	234.8	222.769	204.769	141.517	137.744	138.147
102.713	102.849	103.296	105.924	106.235	105.383	128.427	123.12	122.327	243.818	236.167		185.308	204.818	182.308	216.083	223.02	217.66	230.923	213.583	218.714	208.583	141.309	138.479	136.604
103.532	104.571	102.309	104.197	104.174	104.438	128.274	121.365	122.885	244.769	228.692		200.3	193	184.25	226.625	228.36	207.6	219.583	207.833	248	203.417	142.886	136.041	138.19
103.335	103.348	103.562	105.53	104.644	105.974	128.619	121.415	120.74	248.846	229.333		200.9	184.077	176.917	214.962	223.18	205	230.364	216.167	232.273	194.25	140.589	139.24	137.908
103.497	102.103	102.631	104.797	105.302	104.819	129.643	122.536	121.412	256.364	225.5		194	188.25	190.083	222.75	226.5	211.64	219.077	205	212.538	201.417	143.519	138.577	137.179
103.674	102.721	102.025	105.851	105.304	106.122	129.135	119.752	122.989	274.8	234.417		201.308	178.214	176.462	222.388	226.12	210.16	216.462	209.846	224.25	203	141.478	137.259	138.189
103.06	103.657	102.984	105.757	104.819	105.441	127.976	120.723	122.701	250.615	233.583		197.308	193.917	178	214.98	221.8	208.16	230.538	207.818	212.083	197.917	142.846	137.792	137.934
103.218	102.978	103.753	103.557	104.676	104.649	127.965	122.098	121.436	243.846	232.083		210.7	186.077	172.077	216.68	226.058	212.94	227.3	208.75	215.636	206.917	142.647	136.495	137.785
102.541	101.18	103.022	103.494	105.487	105.158	129.828	121.866	123.093	254.727	237.083		206.9	194.417	180.636	221.625	219.2	210.96	197.923	220.917	209.818	201.583	142.276	139.128	136.832
101.725	104.419	103.275	104.392	106.707	106.327	130.737	120.626	124.297	256.692	230.231		195.615	185	178.929	224.25	221.306	204.72	217.5	224.667	200.545	207	142.641	140.183	136.138
104.006	104.212	103.76	103.614	105.201	104.621	130.788	122.618	122.982	278.6	237.615		212.2	195.545	177.214	217.308	224.333	202.115	218.917	211.833	217.154	211.083	140.889	139.574	138.503
101.516	101.428	102.539	104.192	104.203	106.176	128.761	122.501	122.029	237.385	236.923		210.3	197.667	194.917	215.462	229.68	203.24	212.154	204.077	216.167	213.273	139.56	139.554	136.215
102.572	103.75	103.853	103.555	106.061	104.619	129.576	122.072	121.942	265.9	268.1		197.6	191.818	183.667	220.979	225.92	207.38	234.6	227.385	216.692	208.818	140.816	139.654	134.781
102.814	102.172	104.632	104.535	105.296	104.76	129.915	122.179	123.077	253.909	242.231		204.154	186.538	175.583	223.78	225.08	201.308	211.583	230.5	205.5	212.182	141.41	139.19	136.801
103.322	101.732	103.593	103.491	104.487	104.909	130.48	122.4	122.746	276	226.308		209.8	187	188.333	223.592	227.16	204.54	206.077	217.583	209.154	200.545	140.837	139.856	137.44
102.214	104.666	103.404	102.47	106.026	104.918	130.237	120.268	123.718	248.308	230.583		192.636	190.364	181.583	217.49	231.46	204.92	207.143	211.083	214.583	201.417	140.596	138.108	137.549
103.559	103.652	104.016	104.187	106.615	105.502	128.022	121.956	122.748	245.667	247.917		191.923	177	179.615	216.4	229.36	219.28	211.846	211.667	213.5	199.583	140.412	138.583	137.234
104.051	102.176	103.158	103.906	104.937	104.537	129.989	122.982	122.907	250.154	231.917		199.2	192.333	188.25	223.571	228.979	202.385	253.9	219	207.364	190.25	142.352	137.532	135.114
103.672	103.196	102.114	103.463	105.738	104.785	129.28	121.547	123.381	268.7	227.923		194.9	178.429	183.083	220.229	231.3	206.25	238	223.273	206.071	198.333	141.298	140.33	137.629
103.696	102.708	102.23	101.276	105.177	106.144	129.254	121.67	121.769	253	246.923		190.4	180.25	187.455	217.583	222.612	204.423	219.643	220.909	208.917	196.615	142.492	136.883	138.232
104.111	103.413	102.596	102.994	104.626	104.294	128.589	121.742	122.134	244.692	228.385		200.2	196	175.615	216.188	220.16	211.385	212.571	239.2	222.75	206.083	140.483	138.095	139.224
103.415	103.142	103.59	104.32	105.272	104.585	128.749	121.53	123.243	239.538	229.75		179.462	195	174.429	230.449	225.143	216.833	210.5	219.818	204.385	191.667	141.426	138.648	136.962
103.934	102.997	102.058	104.932	105.775	104.838	128.629	122.292	123.027	246.769	244.545		184	193.909	178.923	222.833	224.229	214.18	224.077	213.364	204.923	192.727	141.823	137.101	138.24
102.463	104.174	103.262	105.278	103.962	103.009	128.933	121.036	122.56	275.1	240.727		193.462	194.909	183.5	221.5	216.8	203.98	217.667	213.385	204.462	210.75	141.2	136.962	137.581
103.955	101.821	103.192	104.748	103.237	104.688	129.091	121.595	124.071	259.083	245.7		195	201.417	184.167	222.667	235.66	210.1	228.417	243.3	193.75	194.5	139.728	139.592	137.218
102.955	103.843	103.541	104.284	103.975	103.763	129.131	121.455	122.465	248.923	242.364		187.077	188.308	177.643	218.8	220.58	208.48	215.929	225.091	199.917	202.692	141.625	138.904	136.468
102.655	105.946	101.994	103.449	107.198	105.67	129.098	122.735	122.991	252.333	255.7		197.5	194.273	169.308	213.8	229.104	201.692	215.571	228	200.083	208.333	141.241	137.282	135.458
102.454	102.525	102.543	104.09	104.952	105.281	129.403	122.462	122.186	237.385	235.615		193.308	199.9	171.231	211.288	222.429	208.9	218.833	234.182	214.7	192.154	140.806	139.07	137.585
104.204	105.022	102.741	103.538	105.756	105.329	128.809	121.709	121.927	256.083	226.615		190.308	187.917	179.75	224.837	223	217.479	219.833	247.6	195.357	199.615	139.324	138.483	136.779
104.403	102.901	101.87	104.575	104.113	103.81	128.634	122.213	122.949	250.818	233.231		192.6	185.75	187.167	217.354	226.104	207.019	217.167	219.083	205.077	208.727	138.562	139.456	136.857
102.265	104.594	103.286	104.246	104.984	105.577	128.507	121.252	121.27	247.917	241.455		184.077	181.333	176.929	217.72	216.962	206.981	205	222	193.286	208.727	141.212	139.429	135.801
100.735	105.111	102.11	103.006	104.835	105.703	128.128	120.993	123.565	250.923	222.154		177.308	192.091	179.692	226.188	217.923	205.08	218.667	219.833	202.538	213.25	139.272	137.737	136.737
102.904	103.407	102.891	103.519	105.388	104.83	127.664	121.518	123.324	238	230		184.615	182.167	174.923	221.061	225.122	214.479	217.692	235.7	203.923	215.091	139.768	137.752	138.76
104.192	103.071	103.764	103.055	105.247	106.438	129.271	121.65	123.808	242.333	229.846		189.923	190.385	187.182	216.354	221.481	208.32	223.923	216.25	208.5	197.667	139.063	136.413	138.386
101.463	102.728	104.624	103.984	105.666	107.422	129.086	120.569	122.195	242.154	230.273		180.846	191.917	172.077	227.521	223.596	205.865	212.077	220.167	213.417	203	139.883	136.829	136.181
102.792	103.127	103.025	104.297	104.252	105.729	129.571	121.753	123.201	248.25	255		205.6	197.083	175.769	225.102	217.808	208.7	228.846	221.417	208.385	196.333	141.439	139.13	137.074
102.098	103.843	101.99	104.112	106.224	104.186	128.188	121.757	122.454	245.75	237.182		189.615	186.692	183.417	222.958	224.25	206.86	210.417	222.333	213	192.083	141.187	137.475	136.623
102.511	103.413	103.412	104.423	103.622	105.022	127.841	123.717	122.706	257.667	256.4		198.692	190.385	178.083	227.688	216.308	203.654	204.231	215.5	198.692	210.636	140.905	137.592	136.304
103.691	103.394	102.283	103.596	104.158	106.334	128.533	122.091	123.313	256	225.308		189.077	199.75	188.167	217.48	225.5	204.731	206	222.25	212.3	205.417	143.924	137.788	135.401
101.748	102.382	101.789	103.921	104.638	104.911	129.633	121.082	122.172	252.917	230		204.8	188.583	171.714	218.4	227.115	206.6	210.692	210.833	227	207.5	139.567	138.898	137.407
104.188	102.503	101.785	105.343	103.857	105.824	128.363	122.278	123.612	249.25	238.727		202.8	198.636	164.077	223.521	224.058	201.62	217.75	250.8	206.154	205.182	141.867	139.747	137.313
102.678	104.096	104.003	105.122	103.516	105.285	128.816	123.162	123.476	244.833	238		174.923	195.667	173.357	217.02	220.173	206.06	223	217.615	219.4	201.909	141.263	139.253	135.804
102.981	104.571	102.732	104.819	104.877	106.215	129.139	123.73	123.242	232.25	227.25		188.462	200.083	182.25	227.061	223.865	209.12	217.333	232.833	222	209.909	142.984	138.686	136.035
103.207	103.744	103.837	105.753	105.461	105.029	129.926	121.555	122.473	247	231.769		195.417	196	181	213.68	225.346	204.423	211.154	226.692	196.615	199.417	141.284	140.589	138.76
102.198	103.657	102.025	104.298	104.371	107.354	130.064	121.051	122.613	247.385	246.083		196.25	200.083	176.154	217.917	223.38	205.98	234.083	212.385	213.8	205.25	141.813	137.218	136.337
102.661	103.25	101.93	104.54	104.906	106.59	128.492	120.772	124.002	252.333	240.083		190.846	189.385	177.923	224.292	221.904	201.558	194.923	215.667	213.5	221.818	139.266	138.114	136.221
102.974	102.481	101.3	101.544	105.133	105.795	130.058	122.883	122.597	233.692	253.6		201	193.5	179	215.14	225.577	201.26	216.308	222.917	212.8	198.846	143.044	136.921	135.673
103.252	103.965	103.035	105.476	105.5	103.101	128.5	120.493	122.228	247.333	238.167		202.1	204.75	182	217.083	224.135	202.66	214.385	217.167	213.6	195.154	140.829	138.62	134.335
102.696	104.561	102.331	102.329	105.032	104.771	129.801	122.322	122.321	235.75	231.154		203.8	197.583	173	228.396	231.54	206.98	227.385	218.917	219.7	204	142.332	139.601	136.468
102.454	103.438	102.026	103.525	104.926	106.642	128.712	121.826	120.923	226.308	250.462		195.4	198.667	183.333	210.12	218.827	198.923	219	229.083	223.3	197.818	140.281	139.441	137.003
103.112	103.163	102.268	104.304	105.199	104.67	128.281	122.357	121.104	246.25	243.25		194.308	203.818	182.5	220.163	231.146	201.538	218.786	220.583	208.1	197.455	142.654	141.137	136.554
104.284	102.258	102.106	104.487	105.889	105.272	127.408	121.96	122.142	233.417	238.417		205.7	193.083	184.083	222.125	227.077	204.72	228.182	215.75	213.5	201.364	141.503	139.313	134.208
103.387	102.826	101.727	103.263	103.959	106.133	129.02	122.335	122.861	238.923	252.7		176.333	190.385	172.615	219.312	226.14	203.98	203.769	229.692	209.6	188.538	141.781	139.924	137.006
101.873	104.353	100.815	104.377	104.461	104.244	128.633	121.011	122.909	242.833	233		199.615	196.182	180.333	218.36	230.84	203.269	227.2	211.167	193.385	192.818	138.956	137.484	134.62
102.841	102.34	102.047	103.366	104.761	105.098	129.356	121.364	122.222	265.5	246.091		195.5	189.333	182.4	211.2	229.6	210.12	199.167	218.667	213.6	200.667	141.013	139.348	136.022
102.178	102.029	101.891	104.404	104.74	103.344	129.624	120.971	122.965	251.333	246.545		198.4	197.5	174.143	226.042	228.1	214.458	240.2	224.75	218.6	183.385	141.718	137.791	136.332
102.772	103.306	101.517	104.737	105.026	105.5	128.186	121.108	121.96	247.077	226.25		187.846	190.833	178.7	215.542	227.458	200.385	220.091	215.667	209.615	195.455	140.975	136.683	137.47
102.519	102.067	102.016	105.441	105.46	104.252	127.752	122.04	123.642	241.231	235		198.1	195.333	180.833	218.24	228.26	202	221.538	216.667	199.538	195.923	142.808	137.4	136.878
103.418	101.853	102.029	103.757	106.316	106.282	129.803	121.379	121.969	243	232.154		201.8	185.154	176.385	219.604	229.2	210.84	214.154	214	203.231	204.083	139.73	138.425	135.864
104.448	103.848	102.771	105.153	105.415	104.184	129.013	122.088	123.283	246.167	263.9		194.833	189.769	173.538	216.1	230.9	209.34	222.091	217.923	202.4	213.818	140.821	138.508	136.724
103.397	103.933	103.183	104.229	104.882	103.845	127.526	121.678	124.436	250.769	237.583		187.273	194	182.333	219	228.68	207.32	235.5	226.667	199.846	206.75	139.458	139.652	137.32
101.733	102.462	102.46	104.627	103.783	104.403	128.101	121.351	122.805	251.231	247.615		179.462	196.273	179.077	213.98	222.51	207.08	210.308	227.333	196.917	212.727	140.157	139.146	137.933
103.07	103.163	102.797	103.506	104.614	104.456	130.365	120.79	122.73	244.154	248.167		187	193.417	183.333	216.56	217.827	199.442	224	219.833	206.462	190.333	140.064	137.396	137.833
104.981	103.266	103.129	104.592	104.645	105.272	128.266	121.049	121.916	261.091	234.154		181.917	191.167	184.75	220.229	227.115	210.96	225.1	216.308	191.154	201.545	140.054	138.098	139.333
103.112	103.266	102.508	104.797	105.006	105.259	128.498	121.172	122.024	260.333	239.917		200.6	190.333	186.182	216.66	215.25	206.827	225.4	226.154	192.385	195.385	139.978	138.724	137.162
102.81	103.974	102.75	106.044	106.948	105.626	129.621	121.93	121.104	246.769	239		194.3	188.364	180.154	223.021	220.692	206.962	209.308	227.364	203.923	205.636	140.257	138.712	137.433
102.247	104.003	102.884	103.939	104.917	104.475	129.109	120.729	123.9	235	251.417		180.077	210.818	180.833	220.94	223.633	206.62	203.615	223.333	194.615	195.167	138.519	139.403	137.733
104.041	102.952	102.375	103.9	104.65	105.269	128.472	119.727	122.752	233.154	227.917		192.923	204.364	181.818	218.583	223.633	205.173	216.231	223.273	203.769	202.364	141.138	138.792	134.19
103.193	103.022	101.811	105.003	106.726	105.282	128.405	121.821	122.717	275.7	253.333		206.5	193.5	181.25	219.592	213.923	208.462	194.462	216.333	205.692	200.583	139.542	137.641	137.196
101.861	103.209	103.554	104.794	105.569	105.481	127.734	122.029	122.522	265.917	250.4		200.6	193.462	185.25	216.5	225.204	201.269	225	225	194.462	186.077	139.917	137.676	135.407
103.772	102.833	102.205	103.437	105.812	106.927	127.687	123.475	122.499	246.538	241.75		190.9	193.5	197.364	218.5	214.173	202.827	219.385	216.583	201.6	186.833	138.276	139.203	137.616
101.82	103.411	102.542	103.687	105.438	104.384	130.175	122.175	123.354	246	251.167		197.4	194.909	180.091	213.58	225	208.52	221.769	223.333	218.25	216.75	141.606	139.372	135.646
103.197	102.975	103.211	104.208	103.93	104.457	128.078	122.073	122.723	262.25	228.833		178.077	188.083	170.462	221.521	225.98	212.38	209.167	224.923	205.25	205.818	138.603	140.335	138.34
102.355	102.958	102.158	102.045	105.857	105.405	128.091	122	121.998	277.1	238.333		192.154	189.333	173.308	220.06	215.173	210.135	216.077	212.231	195.083	202.769	140.891	137.139	133.99
102.716	103.245	102.438	105.199	104.462	104.486	129.698	121.864	120.79	268.6	240		197.333	203	189.545	217.542	215.4	210.038	216.077	225.75	204.462	201.5	140.706	138.443	134.734
102.686	102.064	102.621	103.452	104.086	104.476	129.969	123.179	123.746	246.25	241.417		185.231	181.636	184.25	215.8	224.385	208.538	221.5	230.5	212.273	198.333	141.923	139.308	134.949
103.59	102.804	101.016	104.511	103.759	105.472	128.898	122.767	122.286	264.923	244.545		193.077	195.917	187	217.84	216.673	212.56	208.231	219.25	207.417	208.5	139.272	136.326	136.142
103.78	102.365	102.177	104.392	104.848	103.772	128.711	124.568	122.434	248.833	230.083		192.083	195.667	175.846	220.292	229.36	205.731	230.667	223.214	203	195.917	138.904	136.953	134.433
103.28	102.33	102.258	104.892	105.083	106.288	128.323	121.705	122.954	269.1	235.231		192.077	188.538	177.5	218.38	225.173	208.68	204.308	235.1	198.077	205.538	142.074	138.456	136.311
104.188	103.09	102.06	104.057	103.299	105.506	129.615	121.556	123.376	282.8	229.846		185.5	199.727	183.364	222.417	225.1	207.96	213.833	220.083	216.909	197.333	140.01	137.823	137.781
102.895	103.89	102.506	104.381	105.776	104.248	128.659	122.27	122.511	247.154	236.077		177.643	201.667	193.091	227.938	220.481	215.583	207.462	209.231	202.818	200.385	137.942	138.513	134.365
102.946	102.962	102.262	105.133	104.228	106.337	130.038	122.596	122.282	245.583	261		204.333	185	184.583	218.34	225.885	205.78	213.167	218.429	209.545	191.5	140.503	138.829	136.702
102.783	103.022	101.263	105.623	105.293	105.824	128.741	121.892	121.119	246.462	238.615		184.143	195.818	173.357	215.98	220.423	202.942	221.308	223.917	215.75	202	139.997	137.975	136.962
103.637	102.196	102.356	106.006	105.56	104.047	127.898	120.06	122.482	263.636	242.846		204	190	182.5	215.88	220.596	203.212	215.923	218.75	207.583	194.167	142.288	137.519	135.824
103.131	102.725	102.186	104.212	105.436	105.293	129.507	121.308	122.417	253.917	255.9		195.667	187.25	173.692	216.44	215.808	204.942	226.583	226.571	208.929	202.154	139.337	136.424	135.984
102.608	102.406	102.115	104.797	105.145	104.142	127.752	121.703	121.527	243.923	240.667		183.154	195.583	173.833	211.04	221.712	204.981	221.308	227.4	216.538	189	139.962	136.446	136.222
103.962	103.965	103.163	103.859	106.006	104.801	129.374	122.644	121.892	239.385	226.846		194.583	197.75	178.231	218.271	219.192	208.48	212.385	214.636	214	194.909	141.644	137.921	135.434
103.729	103.093	101.297	104.585	103.648	106.212	129.67	121.421	123.186	236.308	253.1		195.6	191	174.615	219.82	228.6	204.115	214.308	237.1	200	186.167	139.913	139.438	134.579
102.713	103.114	101.032	103.797	105.358	106.136	128.687	122.182	123.011	255.75	246.727		190.5	197.545	169.385	217.229	222.558	198.019	213.417	221.75	204.154	197.5	138.42	135.819	136.282
102.61	103.756	102.833	103.475	105.785	104.528	129.492	120.637	122.137	235.385	238		196.75	197.083	179.077	227.708	217.231	203.38	216.909	210.545	202.643	201.615	140.994	137.497	136.304
103.562	101.994	101.648	103.949	102.728	103.817	129.743	121.239	122.272	257.364	235.846		192.077	186	173.083	221.417	223.2	202.865	206.692	213.167	209.333	198.923	140.301	136.646	134.174
104.34	103.83	102.048	105.26	104.933	105.225	129.546	123.179	123.798	235.308	224.308		185.846	195.692	187.846	213.833	216.962	199.615	216.923	210.417	201.462	196.917	141.234	138.06	134.623
104.092	103.128	102.133	104.087	104.136	105.097	129.322	122.225	122.914	259.6	238.417		199.167	191.917	180.154	217.1	226.288	208.885	205.154	232.333	215.25	201.167	141.895	136.971	135.179
103.219	102.446	103.331	104.498	105.039	104.111	129.48	123.83	122.259	260.4	248		197.417	189.833	174	222.25	223.78	207.458	211.385	225.583	211.5	197.615	139.567	136.263	134.426
102.683	101.478	101.46	104.975	104.578	105.31	129.948	122.022	121.49	237.615	225.923		178.5	187.846	179.143	223.729	223.885	200.481	229.182	215.818	196.385	189.75	140.141	137.596	134.475
103.251	103.022	101.233	104.689	104.932	105.374	130.054	121.332	122.632	248.077	232.182		186.667	192.769	181.583	215.5	222.077	202.019	204.571	218.643	214.091	195.071	141.458	136.74	134.463
103.889	101.798	102.749	105.848	104.788	104.691	130.284	121.987	122.595	246.727	231.077		189.769	195	191.727	222.604	220.44	206.6	211.857	214.917	207.909	204	139.361	137.603	137.68
103.171	102.362	101.374	103.816	103.933	103.796	128.98	123.479	123.465	252.182	234.923		178.538	189.308	183.833	220.438	214.654	208.062	228	208.308	204.455	201.833	140.561	139.353	134.708
102.971	101.885	102.447	103.513	103.335	105.739	129.579	122.455	121.494	269.7	265.3		185.231	180.643	180.909	217.417	218.269	199.212	216.538	215.273	193.846	202.083	139.402	136.93	136.987
102.143	102.779	101.894	105.476	105.391	105.339	129.37	121.193	121.718	251.5	243.231		188.308	194.909	176.154	223.917	221.633	198.673	215.385	215.615	211.846	195.833	138.513	139.112	135.054
103.669	103.286	102.903	103.684	105.917	105.297	127.482	122.434	121.188	241.538	219.462		191.385	194.75	169.538	220.188	228.08	201.615	208.923	214.923	204.583	201.308	138.965	140.54	138.506
102.185	102.888	103.661	103.22	107.138	103.946	128.116	123.527	120.224	256.6	231.083		191.462	202.545	181.231	223.771	222.538	201.269	227	215.167	201.25	193.5	137.867	139.333	134.323
101.182	103.479	102.217	103.393	104.917	106.36	130.268	121.94	121.561	243	226.077		178	193.615	176.538	217.92	227.46	199.596	224.909	211.769	193	192.583	138.413	139.74	134.794
102.882	103.865	102.622	103.92	104.824	107.526	128.562	122.494	123.5	254.769	235.25		179.929	191.077	180.75	215.438	226.731	200.596	217.692	216.333	203.462	192.462	137.683	137.538	134.193
103.527	101.006	102.265	102.149	103.616	103.668	129.664	119.938	120.744	240.231	235.583		202.4	189.5	181.4	216.083	223.94	196.615	219.455	218.917	212.091	198.75	137.811	138.11	136.975
102.595	102.83	101.984	104.991	104.171	104.413	129.737	122.532	121.33	242	224.231		186	188.25	185.833	221.938	222.615	200.308	230.1	216.909	202.385	188.75	139.361	137.788	137
102.061	103.346	101.827	103.814	105.196	106.137	128.779	122.303	121.841	234.692	224.583		194.769	203.083	184.364	219.625	231.64	203.442	216.667	210.455	219.182	191.538	140.385	137.934	137.731
103.684	103.921	102.115	105.903	104.141	105.822	130.143	123.088	122.732	235	228.833		189.917	197.667	181.167	224.625	226.269	207.346	219.692	213.273	200.5	207.583	141.084	138.117	134.842
103.319	101.689	104.278	103.843	105.744	105.243	129.068	121.228	121.555	242.385	233.308		185.385	192.917	179	225	231.82	204.923	225.636	216.769	193.462	209.167	139.959	138.314	137.455
102.521	102.395	102.183	103.053	103.863	105.562	129.307	122.108	123.297	237.333	232.692		190	192.583	184.583	220.812	229.32	202.519	217.462	210.167	214	201.455	140.12	139.827	136.625
103.847	103.859	101.604	103.767	105.384	106.457	128.985	122.092	122.951	242.769	237.692		200.769	196.308	179.909	215.688	229.88	200.692	231.455	217.417	198.818	190.583	139.816	136.59	133.604
105.617	101.824	102.276	104.149	104.223	105.644	127.707	122.042	122.268	234.545	230.769		184.769	185.429	166.308	222.521	229.923	203.404	216.538	231.846	191.462	204.917	141.735	136.873	136.389
103.831	104.351	104.01	103.21	103.854	107.647	129.868	122.261	123.325	242.667	236.667		182.333	188.417	187.25	216.02	236.7	207.962	221.385	207.333	200.846	199.909	140.303	137.272	135.876
103.898	103.3	103.592	102.077	105.156	105.695	130.491	121.183	122.65	245	256.6		187.692	191.308	166.154	225.562	228.962	209.6	238.8	216.417	202.25	207.154	141.068	136.906	134.603
103.348	103.756	104.24	104.028	103.124	104.775	128.497	122.384	122.125	246.2	251.1		186.385	193.417	168.769	218.688	236.52	204.212	200.462	198.167	205	205	138.648	138.965	137.152
103.843	103.832	102.816	104.571	105.475	104.889	127.664	122.705	122.951	261.25	234.923		182	196	185.154	226.896	232.12	209.077	214.462	223.583	190.692	210.182	140.971	138.491	135.161
100.292	101.526	103.778	106.39	105.543	104.549	130.542	120.642	121.738	244.385	243		188.538	187.833	174.538	225.792	230.154	202.25	222.769	215.308	221.091	207.364	138.23	138.07	136.503
103.26	103.045	102.933	104.003	104.251	103.886	128.064	121.758	123.134	239.308	242.692		187.571	186.583	181.273	224.583	227.6	206.46	220.182	220	211.385	212.727	139.416	137.804	137.226
102.75	103.241	103.778	103.363	105.529	105.208	128.049	122.685	121.898	241.846	246.538		204.5	186.429	173.154	224.917	235.3	202.25	213.692	218.615	203	202	140.706	137.067	136.49
102.375	102.535	101.753	104.962	105.681	104.636	129.365	121.804	121.973	239.333	236.5		201.3	197.667	177.231	214.604	231.673	197.346	213.385	215.25	203.231	206.25	140.971	138.937	136.948
104.019	102.615	102.14	104.253	105.523	106.589	127.393	122.223	120.763	243	249.182		189.538	186.154	174	223.125	230.28	202.58	208	218.333	224	197.636	139.6	136.157	132.896
102.638	102.158	101.978	104.247	106.231	106.283	129.261	122.639	121.928	235.923	238.75		186.231	191.75	169.385	221.625	238.64	201.269	210.091	213	219.455	192.727	138.41	137.962	134.117
102.769	102.121	103.384	102.381	104.127	105.434	126.96	122.759	121.933	238.308	240.667		182.846	188.667	184.4	222.167	229.48	203.558	211.923	230.75	195	205.333	138.455	138.171	135.432
102.528	103.465	102.965	104.21	105.275	105.048	129.85	122.783	122.56	249.417	249.417		206.167	200.083	182.308	215.68	231.14	196.519	218.273	215.583	220	216.917	136.592	139.657	134.419
102.123	103.968	102.676	103.675	106.029	104.54	128.768	122.506	121.527	265.25	234.75		198.083	192.846	185	226.354	231.44	207.625	207.692	214.75	216.455	205.636	138.156	139.746	135.927
103.225	103.566	102.636	103.24	106.16	104.769	128.199	122.109	121.59	247.615	243.167		191.077	190.667	183.25	225.875	230.592	200.75	208.417	211.769	205.273	197.455	137.452	139.424	135.514
102.556	102.949	102.782	104.125	106.754	104.837	129.326	122.782	122.018	252.667	258.8		197.308	195.083	171.538	223.812	224.208	216.042	206.25	218.917	205.429	207.727	136.93	139.292	136.189
102.762	102.846	101.598	105.435	106.023	105.227	128.39	123.009	122.767	238	229.75		187.692	196.083	191.8	225.833	229.08	208.44	203.077	207.231	214.545	183.077	137.155	138.33	135.146
101.829	103.255	102.035	103.751	106.696	105.479	125.675	121.468	121.629	260.417	243.25		202.3	193.667	176.692	217.347	225.76	204.019	212.462	221.083	203.857	190.091	137.684	139.752	136.407
102.711	102.099	104.023	103.17	105.051	105.389	129.864	122.803	120.614	248	240.462		185.75	193.273	169.308	226.833	228.354	213.521	206.455	206.286	215	201.75	139.346	140.019	135.117
101.961	101.372	102.433	104.377	104.177	105.66	129.778	122.075	121.814	260.667	231.769		188.083	195.667	175.667	223.708	232.52	204.76	209.231	209.071	206.583	195.909	139.517	138.709	135.468
103.492	102.426	102.808	104.679	104.808	104.658	128.639	123.407	121.631	244.615	242.462		186.417	195.083	187.636	226.417	226.62	195.654	209.917	218.75	201.25	203.583	137.744	139.724	136.035
102.042	102.931	102.565	104.541	104.756	105.035	127.973	122.253	122.83	239.692	229.615		190.846	203.818	188.417	222.438	226.74	202.385	227	211.75	228.3	198.077	138.402	141.839	135.542
103.916	104.17	103.994	103.313	105.459	105.411	127.801	122.149	122.894	256.583	261.75		184.583	193	175.308	227.833	229.64	204.78	212.833	237.1	208.077	188.077	137.727	138.275	136.647
102.07	104.953	103.581	104.141	104.375	106.183	129.183	121.675	123.007	235.308	253.917		183.385	194.667	182.25	228.375	231.22	208.479	210.5	213.917	207.923	197.333	137.386	137.984	134.905
103.358	102.901	102.054	102.837	105.038	104.914	129.011	123.59	120.73	252.5	239.917		185.692	189.75	179.308	219.735	227.271	203.14	211.182	213.071	215.417	187.545	137.892	141.263	137.318
102.684	103.768	101.633	103.513	103.912	105.561	130.485	120.947	122.471	251.083	240.769		200.833	194	189.636	221.312	244.82	202.25	208.5	219.692	208.154	202	140.333	140.994	138.161
104.443	102.557	102.894	104.758	104.454	103.662	128.83	120.228	122.706	248	244.308		185.667	187.5	187.583	226.875	227.615	200.538	213.364	217.333	207.077	197.25	139.934	138.804	135.568
104.655	103.173	102.607	104.016	105.013	106.268	128.7	120.844	123.5	243.5	234.833		188.923	199.182	187.75	224.417	231.58	203.692	200.769	231.167	200.083	200.727	137.842	140.888	135.303
102.475	102.307	102.387	104.202	106.204	105.752	127.955	123.282	123.104	244.5	248.154		196.833	197.75	180.455	226.521	237	212.48	212	222.833	201.385	198.083	137.631	140.686	137.325
103.31	102.613	101.856	102.382	105.734	104.554	128.744	122.228	121.835	257.917	236.462		189.333	196.5	177.308	225.75	236.22	202.731	220	213.286	218.167	204.75	138.769	140.186	135.383
103.377	103.583	101.426	104.389	105.288	105.5	128.781	123.603	123.031	241.75	240		192.917	194.25	192	224.854	232.875	209.28	213.154	219.077	223.5	203.75	138.364	140.494	139.51
103.956	103.3	103.774	103.908	105.234	104.742	128.803	120.996	123.042	260	243.333		207.5	193.917	197.364	226.229	239.312	209.521	203.538	220.5	211.667	211	136.07	138.886	135.582
104.946	102.079	102.904	102.987	105.022	106.859	128.912	123.231	121.987	233.917	256.154		185.385	201.833	172.308	215.571	228.735	211.875	199.538	219.167	209.538	202.25	138.073	138.997	138.019
103.56	103.643	102.385	104.741	105.197	105.355	129.179	121.976	122.736	232	239.308		184	190.583	182.923	223.673	227.375	201.36	225.083	202.5	212.25	204.833	138.237	140.481	138.179
102.668	103.478	103.471	104.052	103.949	105.612	128.353	121.053	122.872	245.25	243.833		192.667	201.667	183.583	222.9	231.292	204.22	207.167	224.615	201.538	195	139.528	138.532	138.685
102.88	102.299	101.239	105.814	104.803	105.367	127.998	122.52	123.157	244	230.5		191.846	202.636	183.846	227.542	234.917	204.74	211.25	220.25	218.167	202.5	139.813	140.086	137.117
103.604	103.135	103.812	103.105	104.806	105.096	130.968	123.294	122.097	250.583	237.231		188	192.667	189.091	217.449	241.042	207.562	215.25	217.917	196.154	184.917	139.641	139.406	136.7
102.546	100.814	102.92	103.481	103.064	104.808	129.264	122.33	121.687	255.833	233.615		191.615	202.364	176.786	225.625	231.163	204.92	214	206.071	210.25	197.417	138.229	139.208	136.578
103.717	102.519	102.613	104.778	104.722	105.211	127.72	121.991	121.016	255.333	252.5		200.25	194	180.417	218.06	222.615	213.312	212.308	208.857	203.917	204.667	141.632	138.314	137.502
102.521	103.232	103.894	104.404	105.227	104.285	129.72	121.128	121.184	245.5	238.667		192.833	195.9	167.923	218.204	227.458	211.06	223.167	224.583	214.25	194.357	137.667	137.914	136.244
102.816	101.391	102.115	103.965	106.029	106.635	129.945	122.699	122.531	247.417	256		188.083	182	189.091	225.833	218.635	205.646	209.538	206.929	206.167	190.818	140.791	139.686	137.403
103.79	102.295	101.135	105.079	105.475	104.367	128.44	122.729	121.604	238.917	231.538		181.154	189.083	183.417	221.918	234.375	206.731	208.833	227.167	202.077	195.083	139.003	139.196	137.627
102.825	103.048	102.565	104.887	105.674	105.557	126.94	121.789	122.743	248.5	246.083		187.154	204.083	183.75	219.125	228.184	202.1	208.769	232.083	195.692	206.214	138.726	139.343	135.383
104.267	102.86	102.566	106.377	105.182	104.092	128.754	122.034	122.889	243.333	220.25		193.462	181.385	188.545	217.102	223.481	208.854	220.846	226.25	209	184.5	139.019	138.333	135.82
103.613	102.386	102.167	103.266	105.665	105.255	128.288	121.406	123.197	231.167	236.083		190.5	195.833	173.769	224.188	227.288	204.8	216.538	230.333	215.417	203.917	138.492	141.978	137.028
104.397	102.344	100.577	105.003	106.342	105.057	130.204	122.093	120.996	257.75	262.2		197.231	191.5	175.154	222.896	226.58	208.62	220.769	210.833	194.286	187.071	138.449	139.111	135.778
103.092	102.968	102.723	103.486	105.291	104.009	128.692	120.998	121.519	260.5	264.5		205.167	193.083	182.615	223.531	227.46	201.96	220.462	209.923	197.154	198.75	138.362	140.594	136.653
104.54	102.01	103.619	103.144	104.968	104.454	129.472	121.155	121.458	245.833	240.583		198	195.583	184.091	224.02	234.562	209.62	217.083	219.75	217	191.462	139.316	138.386	137.19
103.124	103.462	103.256	103.591	105.381	105.58	128.984	122.523	121.397	247.833	232.077		194.385	183.5	185.308	233.667	230.938	211.3	216.308	220.5	214.167	195.917	139.054	138.56	136.753
104.321	102.295	102.416	103.981	104.911	104.085	128.504	122.44	122.521	238.231	236.583		196.308	200.083	168.214	229.396	226.692	210.46	225.5	213.917	210.231	200.5	138.391	138.319	137.791
103.213	101.285	102.632	105.26	104.587	105.341	128.901	120.924	120.102	235.167	236.333		189.231	178	182.727	220.735	228.135	206.667	217	215.071	224.083	197.583	138.221	139.675	135.927
103.952	102.042	102.901	103.71	105.022	105.522	128.946	120.978	121.355	250	240.077		193.083	186.25	194.636	226.88	227.058	202.583	203.417	206.833	207.182	199.083	138.038	140.159	135.725
103.34	102.788	102.526	104.454	104.126	104.418	128.647	120.921	121.777	246	237.917		191.077	192.917	183.538	227.354	230.163	200.771	205	220.333	198.769	198.571	138.114	140.6	137.831
104.187	105.066	102.292	105.415	105.035	104.863	129.483	123.641	121.848	248.917	238.25		200.462	201.385	185.308	217.333	230.481	206.78	216.333	217.769	199.214	197.667	138.283	139.103	136.658
102.413	102.994	101.383	103.971	104.494	102.541	129.643	121.17	121.608	258.917	225.769		186.615	209.6	173.643	228.771	223.346	201.56	223.154	216.083	201.5	205.667	138.766	140.114	138.058
102.688	101.353	102.247	105.95	105.748	104.958	128.297	121.894	120.285	234.077	238.385		190.538	192.818	193.308	212.479	231.72	207.7	220.462	219.25	218.917	203.5	138.462	139.171	135.449
104.424	102.24	101.821	103.758	104.769	104.478	128.616	121.467	121.925	258	256.9		187.846	197	188.909	224.938	223	200.077	214.692	227.727	203.231	203.25	138.333	136.791	136.291
104.984	102.08	102.689	105.035	104.416	103.739	127.957	121.115	120.982	245.833	233.308		189.25	185.917	180.923	222.612	228.9	210.396	216.615	219.091	199.154	210.5	138.692	140.244	138.444
104.396	103.442	101.597	103.58	107.435	105.697	128.89	121.663	122.947	235.308	235.769		197	182.917	186.091	217.061	226.26	209.167	228.583	213.455	210.846	205.667	137.936	139.089	136.984
103.174	101.605	102.579	103.867	105.304	104.707	129.113	121.936	123.016	239.75	234.846		188	200	184.083	221	230.082	211.36	219.25	227.2	200.231	196.154	137.6	141.373	135.253
103.171	102.439	100.487	102.451	103.669	104.804	128.184	121.729	123.25	241.583	235.692		195.462	190.917	182.231	225.408	227.02	208.94	202.583	201.857	202.083	200.429	138.333	139.576	136.543
104.807	103.844	101.247	103.142	105.229	105.44	127.37	122.042	121.834	252.917	230		196.538	192.167	184.818	216.812	229.854	221.02	216.846	211.5	212.583	202.167	138.373	140.486	137.594
102.563	103.513	102.268	103.449	105.292	106.46	127.692	123.333	121.996	236.077	266.7		193.538	188.667	191.25	222.184	227.48	208.1	211.154	207.25	197.692	205.417	138.375	139.41	136.108
104.222	100.292	103.016	104.873	105.465	106.048	129.912	122.28	122.483	239.75	254.8		194.308	199.909	181.091	226.708	222.6	211.327	217.364	224.091	205.692	189.929	137.509	138.381	136.587
104.994	103.476	101.631	104.76	105.01	104.363	129.226	121.338	123.471	249.75	249.364		192.923	200.917	180.5	211.135	221.577	209.25	216.154	226.231	194.077	206.25	138.032	138.166	136.12
103.051	103.337	102.042	103.837	103.965	105.583	128.872	122.617	122.161	265.083	257.8		191.538	191.417	178.5	225.562	225.18	209.375	208.923	240.3	193.429	194.833	138.33	137.535	135.541
102.759	102.923	102.073	103.423	104.78	105.408	127.809	122.736	121.956	234.833	233.615		189.538	199.083	177.417	219.25	227.68	210.708	206.846	221.417	205.455	201.833	137.37	141.399	136.888
104.519	102.382	101.946	105.176	104.688	104.285	128.111	121.924	121.562	242.833	263		193.231	200.091	175.857	217.417	224.154	212.583	225.667	213.214	210.917	193.786	137.071	139.202	137.33
103.528	102.029	100.433	102.227	105.418	102.863	129.82	121.574	121.733	240.917	233		188.167	200.455	181.417	225.76	220.827	213.542	209	221.833	195.214	204.75	138.025	138.474	135.443
104.275	103.151	101.064	101.486	105.247	106.127	127.428	122.976	120.761	241.833	236		192.75	195	189.545	217.388	224.423	207.521	220	224.455	207	188.786	138.822	139.333	136.048
104.991	102.76	101.94	105.255	104.254	103.776	130.061	123.421	122.162	240.167	248.6		191.417	199.75	167.071	219.6	227.596	214.36	210.25	224	208.167	196	138.145	139.677	136.26
103.519	103.303	102.1	103.373	105.773	105.59	129.053	120.774	122.46	236.833	262.5		186.231	184.917	168.538	220.32	222.115	210.02	209.923	210.167	204.857	216	140.511	139.329	135.321
104.009	103.923	101.808	104.519	104.908	105.756	129.784	122.37	122.136	240.667	231.077		195.692	200	179.692	221.229	222.84	210.34	212.417	219.545	202.154	207.917	139.437	138.654	137.458
104.077	104.224	102.54	103.048	103.055	106.372	128.271	122.765	121.688	251.833	245.091		186.538	194.417	180.909	222.449	228.54	209.24	225.929	220.583	206.071	191.786	138.054	137.635	134.797
103.452	103.724	100.446	104.212	105.984	105.506	128.112	123.566	122.699	248.167	222.231		191.167	195.917	182.167	213.143	237.583	208.08	219.846	224.182	206	189.214	139.444	140.282	135.971
102.744	103.519	101.615	103.086	104.386	104.651	128.657	122.117	122.601	230.917	256.4		196	189	174.571	210.5	224.212	206.942	234.3	204.714	217.083	192.143	138.559	138.354	136.083
103.885	101.353	102.199	104.75	105.159	104.719	127.677	122.923	121.65	238.833	238.846		188.417	204.667	176.538	223.854	231.46	203.14	232.417	227.818	200.75	191.429	139.819	138.87	136.924
103.67	103.273	102.138	104.257	103.804	106.474	128.51	123.269	123.002	236.083	231.5		185.917	191.5	183.083	220.729	233.5	203.96	227.818	215.786	212.5	199.167	138.719	138.407	134.883
102.455	104.406	102.929	105.182	104.454	105.667	128.762	123.153	122.366	238.917	253		191.5	195.846	171.231	220.938	229.08	209.038	209.857	215.75	211.167	188.571	137.714	141.42	134.349
102.888	103.083	103.5	105.104	104.414	103.079	129.531	121.832	122.376	245.417	227.5		192.25	194.333	173.923	223.271	223.442	208.98	235.667	217.077	219.455	192.714	137.942	140.808	134.956
102.423	103.513	102.804	104.494	105.546	104.817	128.567	121.411	121.407	243.333	231.692		194.75	181.538	171.308	219.735	232.8	210.06	216	246	204.75	199.833	139.358	138.519	134.475
104.106	100.942	101.904	104.131	105.063	104.321	128.896	122.643	122.283	248.75	226.846		189.917	187.462	177.833	222.02	225.942	207.854	218.182	213.286	200.909	210.75	139.459	139.763	137.285
102.856	102.892	101.482	105.392	104.849	103.256	127.648	124.163	122.476	231.833	237.769		193.5	187.75	187.25	212.096	229.48	203.827	210.077	215.583	196.357	195.167	138.41	140.003	135.259
102.994	103.644	102.699	104.827	103.636	105.339	128.112	122.82	121.872	236.333	246.667		194.417	200.917	177.769	217.062	233.625	202.2	202.917	224.727	215.75	217.917	137.058	140.16	137.228
105.994	102.426	102.006	105.558	104.699	105.243	129.036	122.449	122.102	231.154	225.692		196.667	194.231	191.545	216.755	230.923	212.16	214	232.818	208.538	203.333	138.689	138.705	136.146
102.408	103.129	102.006	104.741	104.335	105.388	128.673	121.506	123.565	242.333	242.769		184.583	185.857	186.909	214.308	226	204.72	214.231	210	202.643	213.333	138.457	138.487	138.137
103.325	102.311	102.048	104.713	103.508	104.197	128.289	122.647	122.534	242.417	252.8		196.417	200.667	183.182	214.44	226.615	206.788	217.308	214.667	209.167	188.714	138.142	138.962	136.063
104.487	102.478	102.135	103.432	104.776	105.022	129.565	123.137	123.848	232.615	256.75		193.083	181.786	193.917	215.058	226.327	204.019	218.75	228.333	210.909	190.286	137.574	141.384	137.235
104.166	102.975	102.37	105.287	104.862	105.443	129.442	122.8	123.313	242.25	246.462		194	190	179.692	219.135	229.519	206.062	210.615	215.25	205.214	192.143	137.744	140.894	136.298
104.322	102.715	102.781	103.147	105.212	105.393	129.771	122.443	123.836	235.769	260.7		203.417	193.538	185.727	213.365	226.019	210.3	241.5	223.083	209.091	192.786	139.657	141.261	135.6
104.768	101.994	101.923	104.306	105.564	105.095	129.862	122.659	123.79	237.923	253.8		194.5	203.9	190.909	218.846	228.558	204.25	214	227.385	199.286	196.357	139.038	140.975	137.19
103.621	103.122	102.096	104.494	104.374	104.188	130.247	123.49	122.406	239.727	248.583		200.917	189.333	176.077	214.135	226.231	208.827	215	228.083	210.615	195.667	139.441	139.685	136.858
103.889	101.01	102.386	104.968	104.344	105.035	130.36	121.193	124.141	235.583	243.083		194.333	192.818	184.2	214.75	226.885	208.462	202.5	226.077	199.75	205.5	137.122	140.168	134.693
104.694	101.14	101.737	104.609	104.539	105.368	130.907	123.026	121.932	238.833	275.6		198.333	190.615	187.273	222.25	229.442	205.58	213	228.417	208.769	194.929	138.016	141.127	135.69
102.981	104.301	102.394	105.314	104.299	104.397	129.868	121.85	123.228	228.917	271.7		192.75	186.308	183.2	215.981	235.22	208.75	208.231	225.667	200.846	202.917	138.273	138.748	134.822
103.927	103.272	102.14	103.262	105.958	104.167	129.4	121.611	122.438	235.462	242.692		193.167	208	195.909	217.942	237.479	203.288	216.25	224.25	207.583	196.5	138.342	139.171	134.788
101.221	102.397	101.199	103.426	104.601	104.387	129.631	122.369	122.109	256.9	249		191.5	195.333	171.929	217.385	234.962	206.885	223.091	235.8	203.167	196.857	138.943	137.822	135.378
102.297	102.703	101.872	104.305	105.406	104.25	129.803	122.122	123.143	242.538	253.182		188.667	195	181.091	211.385	237.061	202.135	211.5	215.846	204	204.25	138.946	140.467	134.199
102.868	101.596	103.522	104.808	103.93	102.835	130.78	122.934	122	240.231	260.5		178.923	190.545	186.667	215.712	234.173	207.173	224.077	224.636	210.583	192.25	138.555	139.292	134.576
104.211	102.619	103	104.913	106.263	105.343	130.281	122.442	123.56	257.4	250.462		201.727	185.154	187.846	219.365	229.288	210.68	216.091	233.462	210.636	203.083	139.429	140.506	136.769
103.744	101.84	102.465	102.925	106.179	104.657	131.288	124.051	122.692	242.417	271.9		190.667	193.667	179.167	216.865	227.208	211.38	230.2	249.4	211.667	184.857	140.073	140.471	137.449
103.815	100.894	102.362	104.37	104.769	105.117	128.859	123.058	121.029	233.667	247.462		202.5	192.917	189.818	216.212	229.077	210.88	239.5	220.333	228.636	192.357	138.978	139.214	135.419
103.678	102.583	102.256	104.019	105.145	104.465	130.711	123.277	122.685	240.231	252.692		195.455	197.75	174.308	215.827	225.692	210.538	223.091	219.538	210.231	185.25	139.808	139.955	135.139
102.65	102.981	102.213	105.051	106.599	104.571	131.011	123.301	121.801	233.846	263.6		195.5	203.583	183.818	218.44	226.94	207.731	219.769	232.231	218.364	199.5	140.205	137.952	135.089
103.306	103.631	102.337	104.802	104.913	103.914	131.027	123.778	120.976	242.636	233.077		196.75	206.091	182.545	213.615	227.423	208.019	219.917	222.333	206	190.786	140.791	137.38	137.155
103.363	102.869	104.177	103.578	106.622	104.837	130.848	122.563	121.441	260.3	239.231		173.357	198.364	179.636	218.041	227.923	209.058	215.25	224.583	200.167	186.214	140.769	139.048	136.025
103.691	103.019	102.234	104.079	105.321	106.987	130.998	122.989	121.471	257.6	245.385		195.333	203.75	185.75	223.173	228.019	214.769	234.692	219.923	197.846	185.643	139.681	138.737	134.388
104.315	101.292	102.721	105.157	105.418	106.464	128.717	123.437	123.073	252.077	249.417		199.455	193.5	190.364	216	229.962	213.24	222.308	228.923	203.583	194.214	138.283	138.215	134.554
102.401	102.442	101.24	104.772	103.924	104.633	129.909	123.801	121.866	247.091	243		206.364	205.818	193.182	219.269	232.442	203.231	203.615	218.077	221.364	199.583	139.509	138.544	134.07
104.248	102.256	102.86	103.035	107.54	104.934	129.233	124.018	121.915	239.455	264.7		201.667	191.923	183.167	222.8	232.167	208.308	216.8	225	200.308	199.417	140.897	138.341	135.234
104.68	101.468	103.706	103.886	105.943	104.7	131.175	123.246	122.353	241.846	239.667		186.182	207.909	172.357	217.096	226.481	209.654	218.75	225.846	223.273	197.286	137.449	139.883	136.057
105.594	102.685	103.435	103.687	104.211	104.99	131.009	124.169	122.128	249.9	252.75		203.333	189.583	177.833	222.02	220.346	207.6	221.692	213.818	197.636	192.417	138.984	138.625	134.133
103.15	104.304	101.792	106.252	105.361	105.08	130.444	122.321	121.446	246	252.417		216.917	190.833	183.909	218.404	228.28	199.615	217.583	210.833	205.727	199.571	138.917	139.634	134.684
103.274	101.096	102.628	104.006	106.429	105.426	129.883	124.163	122.06	256.923	239.308		195.692	197	190.727	224.923	223.923	214.288	210.571	221.538	210	190.214	138.449	139.535	134.502
103.342	102.92	102.675	103.2	106.293	105.091	131.991	123.596	121.823	238.692	247.667		185.538	203.909	191.455	221.224	220.5	209.846	223.692	213.077	196.846	188.25	140.292	138.535	132.532
102.164	103.079	101.842	104.244	104.951	104.629	130.131	124.229	121.692	236.769	249.5		200.545	197.909	183.273	222.163	234.12	208.865	208.077	218.167	205.154	196.429	137.864	138.718	134.782
104.855	104.029	101.532	103.487	106.854	105.872	131.391	123.277	122.197	237.923	242.154		192.923	209.909	181.4	226.959	228.058	205.577	206.929	219.692	195.462	194.429	138.083	137.743	136.138
103.358	104.131	102.949	103.335	105.234	105.348	129.439	121.934	121.798	266.5	249.417		193.167	180.5	176.769	227.367	224.288	209.808	221.5	215.583	206.833	200.417	138.171	138.6	136.901
103.867	103.328	103.946	107.126	104.848	105.882	130.784	124.248	120.135	243.333	242.692		194.545	194.7	184.182	224.878	228.038	210.5	216.923	225.5	198.077	190	136.835	137.565	135.899
102.399	104.07	102.495	104.658	104.71	104.792	129.956	123.492	119.984	247.333	246.083		206	197.182	187.273	232.531	234.68	208.2	203.727	222.083	201.167	204.917	138.692	136.554	136.098
102.623	103.178	101.827	103.24	103.789	102.342	130.795	123.893	119.705	241.385	254.583		193.364	199.818	181.091	228.865	239.48	205.673	227.25	209	208.182	192.5	137.655	138.301	136.79
103.07	101.857	101.772	104.718	104.42	105.016	129.859	121.836	121.062	262	241.231		191.615	199.154	178.333	223.531	232.694	206.827	224.364	213.071	202.545	193.25	136.038	137.415	136.05
102.364	103.505	102.335	105.487	105.226	105.469	129.406	123.037	120.309	256.417	248.538		189.308	205.231	195.091	226.735	238.917	205.077	200.846	230.545	206.455	194.643	137.165	139.342	135.339
105.427	103.682	101.256	104.36	103.706	104.756	130.803	123.551	121.996	260.167	250.083		206.5	210.5	169.923	226.74	232.735	206.365	213.462	225.167	210.583	209.583	136.873	139.343	137.256
104.134	102.194	102.469	103.705	104.089	106.194	130.235	123.004	121.25	279.8	251.5		175.846	201.25	182.077	222.306	241.521	202.269	211.75	233.857	201.75	201.167	138.098	139.873	137.573
103.534	103.179	101.891	103.487	103.994	104.905	132.263	123.295	120.718	257.333	258.4		186.462	196.25	185.5	226.939	240.5	201.769	209.071	232.5	205.417	201.643	136.051	136.595	136.848
103.003	101.503	101.009	104.815	105.926	105.388	131.102	121.82	122.069	227.167	248.25		191.385	211.692	185.5	228.02	238.14	209.077	216.727	246.3	210.5	183.692	136.657	137.381	136.481
102.936	103.045	103.035	104.773	106.016	104.583	129.563	123.109	120.705	247.615	260.7		189.692	187.692	183.167	223.224	237.875	202.5	216.923	214	209.333	203.667	137.747	140.006	137.332
103.282	102.929	103.329	104.627	105.851	104.303	129.185	122.081	121.545	260	237.462		189.462	203.333	177.077	227.673	238.64	204.731	215.462	213.143	213.917	203.583	138.849	138.936	136.288
103.112	102.189	103.981	104.71	105.158	104.554	129.143	122.397	120.748	241.538	237.5		186.385	194.077	180.667	223.75	230.449	203.3	208.846	222.545	203.308	216.417	140.157	137.301	137.247
103.968	103.221	102.562	104.53	103.325	105.362	129.43	123.452	121.211	262	242.923		186.923	200	180.154	218.917	235.229	207.923	220.5	232.667	198.462	204.583	137.006	140.208	134.832
100.821	103.814	101.721	105.297	106.297	105.575	129.66	122.245	119.171	245	253.167		192.25	192.25	190.909	224.653	233.98	209.365	219.385	235.167	209.083	199.25	138.804	139.87	136.032
102.019	103.054	101.217	102.455	104.102	105.171	129.845	124.892	120.137	247.75	237.308		186.923	198.917	188.308	227.694	237.56	202.981	214.231	237.25	203.333	201.143	138.566	137.826	138.633
104.01	102.997	102.208	104.407	105.471	105.304	129.841	122.821	120.422	254.75	243.75		205.545	206	171.692	219.48	238.229	205.769	205.231	225.167	213.182	196.25	137.487	138.715	136.915
103.118	102.726	102.582	104.623	105.902	106.792	129.966	122.428	120.254	252.333	251.167		197.615	191.231	173.167	226.82	241.18	203.558	218.545	219.667	205.333	198.5	138.435	136.908	135.677
103.99	101.929	102.548	105.36	105.674	103.813	127.163	123.528	120.745	252.167	237.667		180.923	194.833	179.071	218.375	230.28	210.481	207.846	224.5	216.364	188.75	136.873	139.965	136.465
104.608	102.124	101.635	104.538	104.322	104.962	129.934	123.248	120.711	256.417	243		199.6	195.5	189.833	232.592	235.56	209.558	204.923	243.083	203.923	208.5	140.108	138.115	135.497
102.832	103.359	103.099	104.346	106.332	104.379	128.661	124.401	120.16	265.167	232.167		201.417	200.909	188.364	222.98	238.265	208.212	216.462	237.667	202.417	203.25	135.683	139.557	134.06
102.283	101.958	102.117	104.006	105.956	104.259	129.658	123.086	120.062	241.167	238.615		213.273	189.091	188.769	223.469	225.385	209.096	204.833	222	199.538	210.083	136.641	139.142	137.177
102.787	104.147	102.159	104.104	104.198	107.121	127.585	123.015	120.042	241.667	250.417		200.417	189.583	182.25	222.143	239.796	205.288	228.2	223.385	209.273	207.25	139.655	140.706	136.547
102.841	101.85	100.543	102.058	104.58	103.212	129.914	122.007	120.138	251.077	251.25		196.083	195	186	226.562	233.714	211.212	244	234.75	208.273	189.143	138.587	141.459	135.494
103.62	101.939	101.33	104.051	103.851	106.019	129.15	123.512	120.545	246.25	248		188.692	199.333	192.545	215.404	242.86	210.538	220.5	206.769	204.583	196.25	137.298	139.481	136.804
103.978	102.747	102.444	102.869	105.035	104.916	131.816	122.818	121.856	254.833	235.077		192.846	196.583	178.273	227.184	228.5	205.038	228.615	207.857	211.364	206.214	137.284	140.93	136.38
103.176	102.854	102.212	104.377	105.353	105.239	130.372	123.858	120.969	232.615	238		189.538	187.923	187.667	226.771	244.22	203.712	213.25	227.818	201.615	196.714	137.99	138.74	135.684
103.7	100.987	101.41	103.176	103.956	104.357	129.835	123.188	120.527	243.667	231.462		199.909	194.75	186.417	230.875	234.837	202.096	219.923	227.571	205.538	195.917	136.287	137.864	135.804
102.307	101.747	101.747	103.866	107.086	106.874	129.007	123.013	121.093	246.417	262.4		203.417	191.333	170.167	233.125	232.102	205.269	214.231	219.462	220.167	207.25	137.637	139.561	134.902
102.767	101.915	101.958	105.49	106.79	105.756	130.717	123.244	119.718	242.75	247.727		195.077	191.25	193.727	223.22	245.64	201.346	230.636	222.214	213.385	205.333	137.915	139.048	136.402
103.674	103.051	103.074	104.639	104.439	105.378	129.935	122.917	121.563	254	248.4		186.846	196.615	182.308	226.604	232.538	207.25	228.308	214.286	218.636	207.75	137.902	140.712	135.159
103.958	102.551	102.958	104.199	106.114	104.21	128.333	122.237	119.765					191.917	184	206.583	224.308	202.808	221.6		218.667		136.446		135.449
					104.108	131.52
						130.885
						128.844
						129.387
						129.958
						129.531
						130.013
						130.689
						129.051
						130.256
						130.035
						129.519
						129.363
						130.187
						129.909
						129.492
						128.406
						130.091
						128.564
						130.664
						128.841
						129.016
						128.524
						129.817
						129.578
						130.448
						129.876
						128.426
						129.61
						130.088
						127.89
						128.298
						130.141
						127.801
						129.224
						129.419
						129.47
						130.415
						131.422
						130.415
						129.26
						129.871
						130.351

## Sheet: eat-4AIB activated; RIB process
126.616	125.952	118.683	117.801	122.128	122.77	121.213	123.758	116.276	114.062	132.417	125.812	133.191	161.27	130.506	128.076	110.905	111.235
126.833	125.831	118.72	118.265	122.603	123.742	122.158	124.387	116.683	115.107	131.212	123.263	135.292	162.292	132.432	130.795	111.619	112.272
127.558	127.968	119.237	118.466	123.249	123.332	121.902	124.566	116.427	115.498	133.716	123.658	135.33	163.091	131.91	132.076	112.101	112.01
127.085	127.67	118.769	117.867	123.519	123.704	123.001	125.097	116.748	116.021	129.571	123.922	134.062	162.295	130.152	133.772	111.743	112.146
126.831	126.738	119.69	117.662	123.797	123.964	122.222	124.964	116.56	116.103	133.019	126.11	135.09	158.704	135.684	131.829	111.673	112.6
127.128	127.602	117.723	117.771	124.197	123.103	123.052	124.975	116.341	115.696	130.948	125.844	135.555	160.982	131.215	133.949	112.373	111.953
126.854	127.459	118.594	119.096	123.664	123.748	122.02	124.708	116.06	116.013	131.565	124.909	136.113	160.672	133.462	130.803	112.81	112.58
126.799	127.502	119.526	117.598	124.041	123.373	122.3	125.096	116.361	115.867	131.981	122.697	135.054	161.541	135.104	134.859	112.073	112.687
126.409	126.853	119.263	118.193	123.743	124.119	122.842	125.593	117.154	116.398	129.701	124.271	136.85	164.243	133.463	136.429	111.995	112.374
127.089	126.723	119.56	118.658	123.98	123.972	123.015	125.686	116.312	115.111	133.653	125.229	134.793	161.232	133.628	136.577	112.921	112.722
127.179	126.662	120.411	119.587	122.729	124.259	122.962	125.536	115.81	115.895	135.225	125.412	135.974	163.783	134.795	136.316	112.701	112.791
127.055	126.605	120.774	118.397	123.662	123.548	123.264	125.76	116.186	114.412	133.224	124	136.832	163.33	134.543	133.914	113.454	112.221
127.875	127.42	119.955	118.243	123.891	123.42	123.407	125.671	116.998	117.777	134.603	125.305	135.841	164.116	132.519	131.462	112.939	112.458
126.704	128.039	120.739	118.089	123.476	123.727	122.868	124.793	116.601	116.028	129.797	124.195	138.602	163.045	133.91	136	112.54	112.11
128.539	127.772	120.486	118.451	123.881	124.026	123.213	125.329	116.734	115.973	131.4	121.481	136.718	161.496	135.961	135.901	112.573	112.683
127.378	127.735	120.313	118.289	123.55	124.144	122.817	125.865	116.813	116.061	130.781	125.013	135.661	163.098	130.066	137.513	112.139	112.377
128.258	128.774	120.149	119.016	123.379	124.25	122.753	126.336	117.247	117.649	130.37	125.052	137.183	162.243	132.184	137.658	112.342	112.984
127.967	127.057	120.879	117.513	123.158	124.844	122.787	125.181	118.594	114.862	132.054	123.298	136.307	160.526	135.808	135.718	112.824	112.332
128.605	127.02	120.272	117.71	124.323	123.627	123.264	125.652	117.571	115.542	131.54	125.279	135.911	164.702	134.224	136.988	113.226	112.44
129.127	127.36	120.087	119.386	123.1	124.336	122.412	124.96	117.712	116.925	133.403	123.863	137.09	161.955	131.8	135.338	112.646	112.809
128.717	127.737	120.625	119.195	124.199	125.127	123.28	125.668	117.123	115.943	131.701	124.727	135.383	158.937	132.6	135.57	113.054	112.55
128.514	127.411	120.56	118.518	123.812	124.346	122.774	125.396	117.041	115.534	129.857	124.104	136.054	159.342	134.772	137.58	113.001	112.68
127.675	127.76	120.199	118.757	123.824	123.62	123.7	125.989	118.024	117.4	130.199	125.699	137.195	160.357	133	136.342	112.567	112.606
128.529	126.502	119.966	119.723	124.182	124.549	122.79	125.6	118.095	117.165	130.29	127.708	137.838	163.08	133.136	136.803	112.775	113.123
128.885	127.626	119.245	118.529	123.588	124.328	122.182	126.202	117.407	117.109	131.461	128.619	135.541	163.304	132.789	135.785	112.187	112.192
127.369	127.642	119.134	119.161	123.225	124.03	123.086	125.294	116.137	117.171	133.059	127.91	135.139	159.938	133.15	136.709	112.849	112.388
127.569	127.497	119.816	119.299	123.353	123.605	123.753	125.542	117.571	116.35	131.252	129.532	137.514	160.602	134.256	135.013	112.56	112.462
127.734	127.324	120.29	119.241	124.442	123.92	122.175	125.526	117.781	116.847	132.916	131.208	138.693	162.195	134.316	135.382	112.234	113.11
127.608	127.791	119.536	119.292	123.727	124.435	123.214	126.282	118.388	116.162	130.908	124.314	139.946	160.447	130.725	134.91	112.696	112.996
127.004	127.857	119.783	119.967	123.437	124.108	122.991	127.136	116.967	115.65	130.213	129.143	136.664	159.17	136.91	136.235	112.048	112.766
127.868	127.755	118.791	119.632	123.967	123.735	122.921	126.425	117.482	115.937	133.461	127.724	137.548	159.841	134.456	134.456	112.018	113.017
127.56	127.422	119.574	120.294	124.583	123.67	123.274	126.886	116.499	115.81	132.344	126.729	136.193	161.155	134.074	135.59	112.219	112.787
127.572	128.088	120.068	119.724	123.67	123.883	122.59	126.238	116.954	116.487	132.75	123.077	136.107	161.793	133.143	135.728	112.544	112.654
127.427	128.44	119.668	119.411	123.351	124.045	123.59	126.295	117.57	116.853	132.831	125.5	136.696	160	134.241	135.785	111.837	112.762
127.806	128.629	118.789	118.22	123.775	123.654	123.081	127.396	116.225	117.025	130.603	126.76	135.964	160.708	133.312	133.329	113.025	113.035
127.975	128.882	119.33	119.492	123.734	123.97	122.718	126.76	118.321	117.256	129.993	125.616	136.823	161.625	129.899	135.052	112.057	112.857
128.442	128.844	118.98	119.119	123.33	124.219	122.746	126.451	117.384	116.852	129.865	126.303	137.159	160.776	131.316	134.325	112.181	112.643
127.708	129.17	119.756	118.652	123.9	124.16	122.629	125.795	117.057	116.641	131.595	126.941	136.389	162.814	132.603	135.423	112.127	113.565
127.242	129.763	118.353	118.957	124.392	124.344	122.23	126.058	117.551	116.986	131.127	123.538	138.153	158.652	131.5	132.9	112.086	112.535
128.125	130.037	119.017	118.174	123.824	124.207	122.825	127.012	116.458	116.524	131.154	127.104	135.205	162.527	130.101	135.25	112.152	113.036
127.942	129.058	118.693	119.049	124.159	124.395	122.509	126.525	118.482	117.179	129.245	126.5	139.468	161.268	131.278	136.383	112.659	112.746
128.396	129.361	119.817	118.525	123.851	124.119	123.098	127.523	116.89	115.944	129.669	124.396	138.73	163.018	133.62	134.987	112.78	112.133
128.079	129.545	119.581	120.063	123.312	123.349	122.223	127.31	117.517	116.919	128.722	125.468	135.722	162.965	136.312	133.81	112.743	113.007
127.326	128.856	119.01	118.662	123.476	124.587	122.881	126.846	117.614	116.298	129.864	125.679	133.629	160.423	131.821	133.487	112.938	112.509
127.192	129.356	119.344	119.011	123.265	124.413	122.263	126.495	117.268	118.096	129.569	123.487	138.159	162.442	131.835	140.145	113.051	112.464
127.131	129.629	119.388	118.638	124.049	123.882	122.842	126.55	117.122	116.592	131.09	126.643	134.696	162.369	131.873	135.253	112.128	112.35
127.298	128.997	119.783	118.111	124.127	124.4	122.633	126.67	116.695	116.515	129.454	123.916	137.027	162.425	133.654	134.111	113.002	112.071
127.191	128.824	120.291	118.831	123.83	124.565	122.258	126.78	116.733	116.513	133.453	125.281	136.814	159.045	133.785	137.649	112.084	113
127.055	128.676	118.277	118.369	123.719	123.854	122.505	126.456	117.223	116.639	132.097	123.818	135.783	159.47	133.256	139.169	112.409	112.874
128.267	128.917	118.355	119.446	122.804	123.833	121.938	125.913	117.284	115.715	129.968	123.89	138.531	159.768	132.346	133.974	112.043	112.443
127.538	129.386	119.136	117.653	123.063	124.104	122.75	126.19	117.613	117.204	129.891	124.429	135.6	162.235	136.282	139.013	112.316	112.563
127.379	128.768	119.636	118.499	123.898	124.435	121.895	126.643	117.779	116.268	132.077	125.032	135.239	163.333	133.81	136.662	112.116	113.078
127.346	128.269	120.302	119.013	123.503	124.439	123.12	126.723	117.084	116.636	131.877	124.766	133.973	159.929	132.658	134.526	112.077	112.251
127.705	129.171	119.535	118.676	124.089	124.293	122.188	126.599	116.562	117.118	132.574	123.192	136.191	162.893	133.625	138.632	112.044	113.001
127.846	129.233	119.496	119.085	123.888	123.887	122.633	126.047	116.092	116.793	132.448	125.757	137.027	159.733	133.937	135.405	112.344	112.178
127.497	129.454	119.678	119.412	124.049	124.391	122.914	126.722	116.982	116.413	131.859	128.027	135.248	160.248	132.705	134.738	112.648	112.677
127.441	128.927	120.671	118.894	123.733	124.407	122.469	126.424	117.083	117.029	131.141	125.117	135.578	161.902	130.449	134.564	112.822	112.394
127.893	129.263	119.702	119.98	124.653	124.311	122.471	126.953	116.756	117.314	130.718	127.279	133.504	160.124	133.385	133.722	112.407	112.184
127.367	129.845	120.146	119.848	123.156	124.011	121.912	126.231	116.456	116.901	132.526	127.636	135.92	161.948	134.308	134.052	112.26	112.679
127.173	129.622	119.224	118.23	123.395	124.488	122.625	125.796	116.799	117.371	130.013	125.058	135.147	162.491	131.205	134.173	112.004	112.894
127.452	128.795	120.222	119.217	123.927	124.525	122.646	125.985	117.888	117.657	130.792	124.26	134.09	163.082	130.641	136.949	112.448	112.323
126.867	129.257	120.413	119.395	123.897	124.044	122.295	125.596	116.254	117.518	132.118	126.299	135.2	160.734	130.81	133.949	112.106	113.013
126.402	128.505	119.268	119.525	124.606	123.987	122.167	126.387	117.346	116.202	127.526	122.123	134.857	159.922	132.408	135.667	112.196	112.404
126.975	129.156	119.768	119.784	124.112	123.504	121.174	125.838	116.327	116.69	130.551	128.058	134.591	158.404	131.15	132.987	112.356	112.228
128.012	128.963	120.33	119.427	124.217	123.543	122.461	125.954	116.479	116.69	127.716	126.148	137.903	163.357	133.086	138.308	112.664	112.913
128.038	128.769	119.997	118.753	123.716	124.568	122.727	125.663	117.11	116.351	128.942	127.226	133.828	160.017	130.688	135.013	113.583	112.797
127.179	128.53	120.516	119.443	124.226	124.218	121.992	126.087	116.456	117.194	128.244	126.506	135.664	161.58	130.756	132.397	112.831	112.164
126.834	128.59	120.403	119.337	124.047	123.486	121.757	125.711	117.299	116.834	128.884	126.409	135.31	159.08	129.641	131.885	112.219	112.526
126.479	128.901	120.102	119.286	124.133	123.528	122.862	126.453	117.276	116.658	128.639	128	135.095	161.726	128.823	134.117	112.664	112.794
127.067	128.379	121.287	119.43	124.298	123.785	122.21	125.333	116.092	115.781	128.174	127.794	135.496	162.85	132.579	134.19	112.652	112.956
127.626	128.681	120.278	120.505	123.356	123.614	122.181	125.32	116.421	117.275	131.271	126.548	136.73	160.765	133.75	130.987	112.612	113.342
127.644	129.514	122.281	120.85	123.608	123.728	122.936	125.721	117.236	117.486	127.684	127.701	134.618	161.448	132.291	131.395	113.138	113.426
127.251	128.035	121.259	120.53	124.165	123.916	121.778	125.72	116.804	116.475	132.038	123.865	134.452	161.435	130.086	136	112.644	113.434
126.609	128.68	120.852	120.85	123.489	124.559	121.729	126.071	115.953	116.7	129.286	125.948	132.938	161.239	131.269	131.62	112.318	113.09
127.688	126.957	119.913	120.391	123.698	123.392	122.25	125.799	116.32	116.348	128.821	127.071	134.196	163.336	134.7	135.205	112.793	112.711
127.016	127.304	119.696	120.774	124.098	123.419	122.008	125.499	117.074	116.591	129.865	126.383	131.098	156.46	132.09	133.564	111.716	113.105
127.488	127.161	120.136	120.523	123.994	123.969	122.107	126.282	116.43	116.698	130	124.157	133.876	157.044	132.9	131.705	112.643	113.877
126.976	128.51	119.133	120.744	123.407	123.636	122.357	126.224	117.315	116.928	130.123	129.072	134.496	160.726	130.118	132.883	112.764	112.917
127.095	127.616	119.834	120.101	123.875	123.595	122.513	125.622	117.267	116.029	130.468	128.312	132.42	162.748	130.75	133.089	113.036	113.712
127.337	128.175	121.537	120.925	123.395	123.974	123.012	126.347	117.128	116.452	128.558	126.649	133.389	161.106	132.812	130.87	112.791	113.265
126.994	128.213	119.409	120.772	124.056	124.068	123.069	126.227	116.311	116.23	131.94	124.994	133.452	162.245	132.354	134.701	112.008	112.537
126.727	127.549	120.501	120.396	123.564	123.948	122.647	126.338	116.838	115.923	130.205	127.321	135.673	160.078	129.615	134.658	112.497	112.593
126.215	128.479	119.774	119.731	123.79	123.327	122.483	125.862	117.361	117.306	130.351	129.006	136.405	159.107	129.988	133.821	112.374	113.52
127.719	128.837	120.846	120.946	124.197	123.654	122.528	125.827	117.863	116.562	130.558	123.968	134.885	159.818	131.241	132.304	111.86	112.746
125.613	128.063	119.908	120.303	124.285	123.325	122.334	125.627	114.903	117.055	130.532	125.825	135.17	162.442	133	135.077	112.224	113.172
125.81	127.035	119.523	120.933	124.351	123.704	121.604	126.215	116.352	117.451	131.596	124.619	137.327	160.866	130.418	129.662	112.233	113.549
126.736	127.92	119.556	120.377	124.027	123.806	121.975	126.09	116.367	115.816	130.565	124.219	132.389	160.072	134.84	134.526	112.007	112.026
126.059	127.448	119.525	121.184	124.309	123.813	122.383	126.409	117.241	116.572	130.658	122.314	134.839	159.887	130.013	134.333	113.124	113.507
126.53	128.207	119.403	119.732	123.63	123.766	122.255	125.95	116.9	115.573	129.253	123.532	135.036	159.398	129.544	136.026	112.289	112.576
126.248	127.776	119.475	120.215	123.948	123.489	122.435	126.437	115.695	116.015	130.961	123.327	132.283	159.638	130.375	132.282	112.313	112.695
126.573	128.095	119.399	120.146	124.342	123.459	122.149	126.27	116.595	116.69	132.604	127	134.866	160.366	128.778	132.747	112.666	112.857
126.004	127.832	119.669	119.361	123.596	123.213	122.85	126.729	116.835	115.893	131.503	121.379	135.571	161.382	131.25	136.815	111.894	113.008
126.107	128.244	120.082	120.547	123.9	123.486	122.608	126.426	117.12	116.412	132.439	121.503	132.832	161.536	129.568	131.671	112.484	112.843
125.632	127.355	120.374	120.11	123.448	124.433	122.078	125.921	115.229	116.202	128.219	123.271	131.8	159.628	131.776	132.346	112.153	112.862
127.279	127.838	120.056	121.337	123.447	123.454	122.455	126.325	115.657	116.98	130.994	120.295	134.378	160.357	127.338	131.456	112.184	112.759
126.073	126.981	119.694	120.215	123.845	123.763	122.806	126.901	114.925	115.883	129.365	122.966	131.901	159.894	131.747	131.558	112.76	112.849
126.281	128.108	118.996	121.554	123.445	123.195	122.493	126.775	116.128	115.88	130.679	125.645	133.652	160.142	129.863	131.284	112.691	113.474
125.922	127.981	119.008	120.208	123.291	123.961	121.738	126.32	117.016	115.565	131.916	123.194	135.717	162.87	131.654	136.513	112.355	113.284
126.059	127.325	120.968	120.535	122.352	123.935	123.148	126.801	116.66	115.772	132.013	121.776	135.858	158.429	129.012	132.974	112.384	113.149
126.069	127.623	118.875	121.34	122.936	123.155	122.107	126.49	116.474	115.956	133.071	125.17	132.301	160.514	132.43	132.086	111.524	112.958
125.827	127.383	119.166	119.863	123.768	123.662	122.695	126.406	115.225	115.562	128.819	121.891	135.505	162.487	132.885	132.038	112.019	112.566
127.723	128.067	121.025	120.402	123.319	123.533	122.162	126.264	116.771	115.614	129.708	120.755	134.159	159.195	127.544	132.395	112.216	113.345
126.716	127.184	120.145	120.633	123.022	123.351	123.355	126.353	116.736	115.089	130.474	121.739	136.901	161.425	130.795	130.897	112.44	112.651
126.11	128.193	120.559	120.932	122.614	123.511	122.264	125.981	115.904	116.492	131.766	121.372	132.097	161.77	134.974	136.577	112.09	112.452
126.206	127.943	121.339	120.884	124.369	123.308	122.475	125.645	116.619	116.687	133.046	120.562	134.045	156.843	129.705	133.165	112.904	112.943
126.36	127.807	120.896	119.98	123.407	123.436	123.474	125.865	117.029	116.4	130.729	126.092	134.381	161.67	129.392	132.875	111.941	112.581
125.612	127.709	121.035	120.193	123.469	123.123	122.347	126.255	117.033	116.392	131.167	122.277	134.588	160.82	133.363	133.244	112.126	113.166
126.07	127.605	121.073	120.133	123.165	124.273	123.036	126.983	116.108	116.642	134.667	122.097	133.69	162.224	132.679	130.443	112.585	112.898
125.765	127.824	119.951	120.134	122.645	123.188	121.674	125.643	114.986	115.781	131.615	122.268	135.885	160.435	130.45	135.667	112.452	112.774
126.851	128.737	120.362	120.384	123.379	123.283	122.398	126.797	116.06	117.327	132.458	122.377	132.034	159.288	134.012	131.282	112.097	112.814
126.855	128.016	121.332	120.709	123.558	123.103	122.067	126.114	115.725	115.872	130.864	126.474	133.829	160.139	128.152	133.278	112.802	113.145
126.646	127.675	120.709	120.379	123.442	123.859	122.285	125.894	116.597	115.498	130.813	122.053	132.509	160.611	129.628	132.949	111.856	112.787
126.781	127.532	120.467	121.435	123.645	123.492	122.58	126.583	117.488	116.357	130.768	124.481	134.675	159.974	131.91	134.115	112.276	112.656
126.06	127.816	118.888	118.969	123.551	123.474	121.745	125.697	116.942	115.694	128.429	125.787	133.772	158.518	129.557	132.256	112.255	112.928
125.682	127.626	119.336	120.285	122.933	122.966	121.624	127.164	115.937	115.029	129.584	125.045	131.389	163.062	129.725	133.099	112.709	112.567
126.276	127.424	119.515	120.047	123.467	123.489	122.345	126.934	116.06	115.221	132.37	124.213	131.604	159.894	129.282	134.325	111.789	113.302
126.239	127.135	119.187	119.731	123.012	124.123	122.711	125.89	116.176	115.64	132.098	125.461	132.858	160.523	130.671	135.162	112.507	113.211
126.402	127.736	119.041	121.075	123.498	123.53	122.088	126.627	115.775	116.158	127.96	127.429	133.167	162.248	130.899	134.38	112.529	113.143
126.071	128.131	119.652	120.713	123.513	123.709	121.974	125.883	115.766	116.019	132.535	126.303	135.353	159.474	130.321	131.765	112.101	113.458
126.062	127.31	119.386	120.148	123.082	124.322	122.54	126.692	117.294	116.063	132.622	119.974	133.589	159.652	130.395	133.203	112.035	113.435
126.763	127.124	119.855	121.109	123.447	123.314	122.479	126.554	116.832	116.418	132.27	127.955	132.741	158.292	129.215	135.25	111.765	113.115
127.32	127.745	120.068	120.591	122.95	123.758	122.594	125.938	116.37	116.721	132.753	127.891	131.991	157.292	131.088	134.25	112.629	113.272
126.662	127.797	120.267	121.006	123.055	122.782	121.898	126.753	116.628	116.32	129.16	123.065	132.717	162.15	129.099	133.263	111.785	113.081
126.745	127.792	119.446	121.003	123.19	123.613	122.63	126.569	117.12	116.655	131.086	128.11	135.223	161.096	130.321	134.086	112.259	112.49
126.457	127.037	118.726	121.587	123.219	124.265	121.846	126.327	116.307	116.352	126.753	123.149	138.133	159.496	127.823	133.136	111.887	112.962
126.007	126.568	118.393	120.351	123.758	123.284	122.366	126.441	115.811	115.556	131.507	126.284	132.487	159.593	128.38	135.115	111.616	113.174
126.232	126.966	119.537	121.233	123.695	123.477	121.578	127.032	115.98	115.815	130.273	124.137	133.301	160.578	127.013	130.506	111.938	112.85
125.792	126.841	118.605	121.114	122.741	123.627	122.265	126.112	115.859	115.491	130.368	119.086	133.806	156.393	131.658	131.7	111.533	113.537
126.277	127.386	118.333	120.846	123.635	124.399	122.356	126.919	116.424	116.796	130.688	126.781	135.18	159.491	124.812	134.608	111.988	113.104
125.523	127.624	118.682	120.704	123.637	123.906	122.773	125.878	116.019	117.602	131.038	125.019	134.768	161.504	126.062	135.829	111.98	112.541
127.348	127.148	119.777	119.762	123.492	123.621	122.264	126.441	117.128	117.21	130.565	126.536	131.847	160.802	127	133.037	112.237	113.66
126.476	127.794	118.946	121.312	123.429	123.943	122.381	126.204	116.193	116.982	129.167	127.066	134.858	160.071	127.35	132.716	112.277	112.837
126.11	126.604	119.066	120.096	122.671	123.886	121.839	126.862	116.974	115.831	134.199	127.232	133.548	156.448	127.936	134.39	112.004	113.021
126.324	127.28	118.685	120.252	123.159	123.98	122.159	126.912	116.176	114.817	131.968	126.594	134.973	161.186	127.128	138.266	111.77	113.286
126.139	128.349	119.239	119.718	122.63	125.009	122.712	126.219	116.3	116.033	130.325	124.871	133.31	161.793	129.575	131.075	111.882	112.452
126.682	126.839	119.915	121.477	122.817	124.202	122.637	125.885	116.287	115.99	131.819	127.02	135.345	159.133	130.795	132.179	112.087	112.968
126.545	126.774	118.973	121.013	123.297	124.965	122.143	126.529	115.794	116.102	132.455	127.114	132.568	158.504	129.141	135.566	111.847	112.359
125.391	125.819	119.614	120.364	123.199	124.943	122.844	126.652	116.259	115.044	132.474	125.205	133.591	158.147	126.152	130.912	111.885	113.31
125.442	126.754	119.265	120.348	122.736	124.2	122.323	126.851	115.851	115.341	131.357	126.206	131.207	158.009	130.468	129.914	112.106	112.769
125.496	127.537	118.272	121.575	123.788	124.372	122.513	126.633	115.799	115.943	127.677	124.724	132.636	157.336	128.064	132.354	112.191	112.968
125.726	127.059	119.289	119.453	122.742	124.605	122.063	126.815	115.834	115.466	128.929	124.175	132.397	159.122	127.848	132.234	111.763	113.457
125.013	127.7	119.35	120.115	122.555	124.544	121.51	126.746	116.054	116.028	127.734	125.239	136	159.071	128.367	131.513	112.264	112.715
125.186	127.465	118.679	120.759	123.194	124.328	123.123	126.657	116.477	116.328	127.987	122.781	133.946	159.284	130.937	136.329	111.993	112.851
126.577	127.948	119.521	119.652	123.732	124.35	122.403	126.089	115.359	116.966	129.357	125.187	133.079	159.15	127.588	131.115	111.449	112.11
126.651	127.887	119.175	120.792	124.063	124.493	122.235	126.66	116.546	116.913	127.765	125.155	133.73	159.053	130.308	134.154	111.779	112.838
125.995	127.527	118.708	120.445	122.83	124.517	122.527	126.29	115.756	117.177	128.935	123.732	132.5	160.319	126.58	130.766	112.4	112.715
126.362	126.985	119.994	120.83	123.465	124.673	121.697	126.809	116.044	116.641	127.464	123.303	135.887	159.105	128.519	132.09	111.63	113.059
125.537	127.096	119.24	120.357	123.087	124.353	122.451	125.729	115.622	116.194	133.11	122.432	132.382	159.929	127.679	134.09	111.982	113.273
125.901	127.198	119.001	120.312	123.411	124.154	122.229	126.617	116.041	116.598	133.765	124.596	132.43	155.259	131.617	132.974	111.789	112.154
126.817	126.257	118.347	119.928	123.3	123.888	122.449	125.84	116.037	115.066	132.148	122.69	135.087	159.138	128.076	132.09	112.196	112.226
126.333	126.387	119.669	119.318	122.833	124.571	122.748	126.572	115.821	116.381	132.156	123.94	131.973	158.929	128.543	137.553	111.963	111.984
124.795	126.683	119.222	120.955	123.661	124.7	122.91	125.803	115.914	116.018	130.878	125.786	132.292	157.035	128.4	132.577	112.286	112.423
125.684	126.863	118.304	120.156	123.47	124.539	122.429	126.251	116.536	116.341	130.513	124.059	133.835	158.699	127.55	133.077	111.414	112.616
125.11	127.279	119.215	119.641	123.218	124.23	121.998	126.241	115.346	116.113	131.831	125.437	131.431	160.593	128.125	130.756	111.839	112.646
125.866	127.561	118.255	120.426	123.742	124.169	121.527	126.541	115.859	115.632	128.955	122.896	133.679	162.548	130.062	131.284	111.637	112.484
125.369	127.311	119.074	119.325	123.708	124.581	122.038	125.93	116.281	116.962	127.364	124.981	132.052	161.179	130.25	133.4	111.529	112.047
126.573	126.343	119.508	120.67	123.877	123.92	122.496	125.855	115.376	116.487	128.588	123.649	133.336	159.523	128.649	136.1	112.044	113.262
125.544	127.474	118.581	119.43	123.323	123.885	122.476	126.239	116.45	115.971	131.804	126.723	136.152	160.938	127.354	133.272	112.737	112.524
125.114	127.479	118.774	120.115	123.571	124.432	122.203	125.942	115.927	116.155	132.026	125.086	131.357	156.451	128.026	132.247	112.01	112.582
125.785	127	119.336	119.979	123.364	123.99	122.857	126.11	115.435	116.623	131.353	126.513	134.026	160.061	129.43	132.177	111.832	112.758
126.332	126.984	119.566	120.183	122.798	124.502	122.176	126.943	115.228	116.637	131.538	127.116	134.107	157.106	129.564	130.449	111.498	112.486
126.251	127.328	119.508	120.396	123.392	123.91	122.202	126.015	116.671	116.544	133.417	123.697	134.116	160.871	131.838	132.456	111.919	112.355
125.942	127.494	119.502	120.272	123.647	124.41	120.961	126.459	115.467	116.506	133.323	129.038	134.723	160.086	130.162	131.09	112.272	112.441
124.913	126.965	120.317	119.129	122.98	124.22	122.324	126.243	116.165	115.593	134.136	128.856	135.973	162.904	129.19	134.025	112.82	113.115
125.519	127.994	119.839	119.547	123.314	124.159	121.2	126.192	116.14	116.159	133.61	124.909	136.328	160.841	125.192	133.645	111.952	112.474
125.504	127.402	118.884	119.485	123.146	123.112	122.139	126.906	116.066	116.21	130.813	126.837	135.6	162.226	125.633	131.692	112.343	112.371
126.21	127.436	119.677	119.798	123.356	123.981	121.839	127.214	115.611	116.94	131.98	125.046	135.704	158.17	127.247	130.418	112.151	112.344
126.275	126.61	120.086	119.173	123.772	123.348	121.299	126.852	116.254	115.758	133.794	127.136	132	159.679	128.785	131.449	111.983	112.525
125.234	127.856	120.877	120.318	123.508	122.955	122.048	126.603	115.294	116.491	134.929	125.155	137.304	159.946	127.728	129.896	111.999	113.103
125.708	127.243	119.902	119.114	122.642	123.828	121.956	125.506	115.473	116.863	130.282	127.955	133.609	155.362	130.731	132.895	112.337	113.259
126.057	126.433	118.899	120.01	123.203	124.381	122.505	126.761	116.08	115.615	130.821	127.556	134.861	159.571	128.74	128.494	112.295	112.575
125.493	127.218	119.106	120.639	122.665	123.942	121.799	125.713	116.064	116.678	131.779	129.49	137.223	160.827	127.679	129.646	111.993	113.393
125.702	127.325	118.769	120.308	122.66	123.599	122.145	126.579	115.695	115.695	132.506	128.351	132.699	161.08	132.312	129.063	112.263	113.015
125.619	127.196	119.734	120.072	122.663	124.36	121.965	127.454	115.616	115.816	130.253	123.801	133.722	158.732	128.436	132.218	112.167	112.74
125.075	127.694	119.703	119.549	123.03	123.492	122.485	126.962	115.666	116.173	130.194	123.923	135.795	160.735	130.474	128.269	112.597	112.225
125.123	127.067	119.87	119.879	123.556	124.046	122.03	126.41	115.319	116.93	130.506	127.679	135.418	158.878	130.43	128.924	112.022	112.799
126.669	127.468	119.14	120.528	123.671	123.809	122.203	125.919	115.975	116.568	129.968	126.954	133.509	162.186	129.039	133.372	112.55	112.3
125.46	126.808	119.246	120.493	123.191	124.23	122.058	126.682	115.797	116.192	132.183	127.73	132.277	160.235	125.911	130.137	111.674	113.27
124.633	126.35	119.01	119.767	122.83	124.371	121.676	126.835	115.551	115.747	130.721	126.825	135.649	158	127.747	128.05	111.829	113.443
125.833	126.605	119.795	119.636	122.98	124.228	121.955	126.713	116.522	115.745	129.221	125.961	133.667	158.598	128.5	130.513	112.277	113.208
125.433	126.784	119.332	120.892	123.275	124.211	121.562	126.511	115.437	115.922	131.09	122.69	134.451	157.273	128.897	133.519	111.153	113.032
126.427	126.657	120.168	120.694	122.887	124.747	121.375	126.591	116.043	116.407	132.096	122.731	131.312	156.947	128.282	132.457	111.89	113.122
125.578	127.877	120.079	119.7	122.751	124.549	122.697	126.752	116.568	117.004	133.506	123.416	131.726	159.357	129.287	130.641	111.605	113.672
126.383	126.543	119.07	119.658	122.824	124.201	121.584	127.157	116.112	117.104	133.844	125.566	136.162	158.699	129.278	131.425	111.598	113.471
125.331	126.847	118.526	120.251	123.274	124.4	121.356	126.803	115.173	116.77	130.214	125.039	135.087	162.062	129.091	130.949	112.045	113.683
125.811	127.153	119.7	120.231	122.921	124.032	122.33	126.526	116.583	116.8	132.747	122.827	136.195	158.372	132.2	131.425	111.818	113.014
125.418	126.692	119.179	121.227	123.307	124.283	122.161	125.956	115.723	116.905	134.856	121.716	135	155.288	129.09	130.137	112.365	113.425
125.648	128.043	120.281	120.696	122.933	123.918	121.741	126.185	115.799	116.978	130.494	122.221	132.982	157.574	131.797	127.671	111.734	113.127
126.014	128.177	118.905	119.506	122.507	123.804	121.866	126.559	115.94	116.862	132.234	121.143	134.732	156.757	135.737	130.731	111.906	113.182
126.293	126.816	119.171	120.653	123.015	124.066	122.025	126.827	116.931	117.263	133.656	120.553	133.466	161.55	131.91	133.338	111.658	112.87
125.843	127.17	120.447	119.687	123.086	124.274	122.287	126.064	115.92	117.722	129.417	123.923	134.432	159.793	129.354	132.469	111.734	113.895
126.307	127.328	119.701	119.764	122.622	124.239	122.225	126.473	116.032	116.533	130.724	121.76	133.327	157.853	127.513	130.562	111.788	112.853
125.19	127.123	121.904	120.624	123.134	124.499	122.119	126.359	115.531	117.13	131.773	122.671	133.991	159.743	133.203	129.787	112.29	112.923
125.356	127.518	120.218	120.567	123.1	124.865	122.228	125.978	115.615	116.566	130.039	123.219	133.717	159.679	129.987	130.244	111.975	113.184
125.04	127.866	120.093	120.344	122.301	123.905	121.535	126.364	115.727	116.851	131.877	123.11	135.938	158.739	129.747	132.354	111.878	113.282
126.312	128.117	119.989	120.35	122.802	124.632	121.701	125.404	115.518	115.987	131.703	122.571	134.345	159.257	129.605	132.812	111.345	113.789
125.497	127.178	120.409	120.137	123.045	124.935	121.736	126.619	115.463	116.05	127.955	123.201	133.482	159.852	130.474	130.852	111.521	113.913
125.819	128.314	120.216	120.606	122.14	124.422	122.179	126.275	115.352	115.663	132.682	123.719	134.982	159.759	131.225	130.756	111.816	113.271
125.79	127.781	120.098	121.289	122.257	125.629	122.456	126.629	116.324	116.05	131.69	123.803	135.327	161.853	130.692	130.16	111.829	113.917
126.324	127.327	120.081	120.321	123.445	124.943	122.143	127.904	116.429	116.473	131.693	124.182	132.903	158.539	127.462	132.937	111.663	112.586
126.391	127.361	120.394	120.95	123.14	124.791	122.018	125.651	116.358	115.582	134.49	123.006	133.791	161.209	126.885	130.988	111.719	113.122
126.259	127.387	118.319	120.494	123.448	124.67	121.957	126.731	117.661	116.587	132.154	122.323	134.425	159.336	129.662	131.577	111.559	113.083
126.231	126.798	119.584	120.405	123.026	123.76	121.975	126.177	116.63	115.529	128.895	122.368	133.901	155.473	130.924	132.086	111.844	112.8
124.708	127.066	119.333	120.061	122.668	124.31	121.857	126.438	116.625	115.658	133.484	121.872	131.935	157.496	129.512	133.975	111.715	113.095
124.989	127.514	120.848	119.814	123.691	125.163	121.798	126.762	115.445	115.651	133.104	123.799	133.878	158.64	134.385	135.114	111.909	113.568
125.548	127.222	119.528	120.441	122.298	124.865	121.842	125.834	116.291	116.552	133	122.818	130.94	155.757	130.769	135.875	112.467	113.401
125.365	127.281	119.874	120.368	122.47	124.347	122.769	126.479	115.448	116.959	133.94	122.813	134.252	162.425	131.346	133.09	111.745	113.259
125.183	127.479	118.358	119.56	122.971	124.57	123	126.003	115.381	116.358	134.37	122.889	138.214	160.116	130.158	135.222	112.204	113.035
125.19	127.208	120.1	120.084	122.425	124.087	121.667	126.581	115.838	116.177	133.559	123.078	132.795	156.25	131.705	132.253	111.666	113.035
125.688	127.415	119.169	120.352	122.072	125.014	122.167	126.817	115.846	116.809	133.783	123.227	132.009	157.828	129.4	132.037	110.815	112.811
125.98	127.096	119.388	120.662	122.566	124.55	122.111	126.217	115.823	116.459	134.244	122.626	134.336	159.93	127.823	134.013	111.319	113.183
125.925	128.228	117.852	120.612	122.323	124.614	122.514	125.863	115.67	116.545	132.826	124.019	130.965	158.405	130.241	133.359	111.126	112.559
125.156	127.217	118.8	120.268	123.067	124.967	122.244	126.099	116.014	115.745	130.191	124.277	133.124	157.389	127.582	131.325	111.717	113.246
126.112	126.96	118.887	121.397	123.166	124.742	121.599	126.245	116.446	115.386	133.091	122.224	133.602	158.47	131.253	135.333	112.22	113.472
124.936	127.042	119.222	121.046	122.363	123.674	121.751	126.501	116.064	115.683	134.166	123.622	131.696	158.221	131.763	132.329	111.29	112.941
125.296	126.582	118.855	120.789	122.394	124.592	122.144	126.495	115.257	115.609	132.948	123.779	132.878	156.705	132.538	131.792	111.645	113.3
125.021	127.26	118.833	121.197	122.502	125.008	122.057	126.186	115.329	116.136	134.187	122.74	131.221	160.496	129.645	132.872	111.835	113.042
124.75	127.415	118.639	119.818	123.297	124.384	122.128	125.837	115.743	116.41	130.248	124.942	136.389	157.628	130.359	134.618	111.903	113.06
126.258	127.638	118.986	120.95	122.785	124.333	122.373	126.312	115.778	116.081	131.697	122.123	135.728	160.441	130.525	134.039	111.276	113.406
124.958	127.318	116.557	120.305	122.211	124.386	122.327	126.187	115.835	116.211	130.615	121.923	131.241	159.111	130.645	133.615	111.388	113.03
125.279	127.281	118.432	120.236	122.8	125.133	122.352	126.662	116.523	116.054	131.652	122.935	134.696	156.857	126.397	133.91	111.797	112.909
125.813	127.277	119.179	120.407	123.009	125.452	122.413	126.774	116.204	115.561	131.621	121.808	130.991	158.973	128.582	132.658	111.091	112.857
126.689	126.9	119.326	120.27	122.707	124.957	122.787	126.399	117.228	116.654	133	122.654	135.222	155.655	128.532	127.949	112.295	113.32
125.402	127.533	118.014	121.773	122.315	124.759	122.507	126.886	115.123	116.809	130.523	120.929	132.696	160.69	131.709	131.734	111.266	113.54
126.05	127.62	120.112	121.382	122.811	124.665	122.814	126.079	115.125	115.717	131.188	123.104	133.339	160.774	132.645	131.412	112.415	113.332
125.923	126.49	119.559	121.958	123.019	124.903	122.674	126.277	115.005	116.117	131.065	124.225	132.628	158.044	129.5	134.703	112.494	112.919
125.277	127.204	118.688	120.76	122.26	125.333	122.201	126.685	115.089	115.342	131.858	121.845	134.759	158.514	129.457	132.481	112.141	112.895
125.884	126.891	119.341	121.888	122.589	124.485	122.348	126.76	116.228	115.776	133.803	124.045	134.631	155.75	133.162	129.412	112.302	113.23
125.359	126.857	119.049	120.992	122.024	124.506	122.003	126.036	115.057	116.128	130.981	125.147	132.613	161.312	132	133.962	111.936	113.521
125.941	126.724	119.262	121.058	123.179	125.202	122.248	126.032	116.096	115.754	132.592	125.769	132.569	160.366	129.117	133.744	111.577	113.647
125.982	126.7	120.376	121.199	122.97	125.368	122.212	125.979	115.532	115.819	133.026	124.157	134.821	156.929	132.449	133.231	111.755	113.873
126.07	125.672	119.782	120.238	122.558	124.522	122.84	126.238	117.532	115.68	130.127	129.195	129.783	158.708	130.025	133.81	111.65	113.446
125.547	126.828	119.421	122.041	122.373	125.093	122.28	127.093	116.628	115.535	132.032	127.013	131.155	159.77	131.934	132.154	111.618	112.79
126.327	126.889	119.327	120.956	122.25	125.032	122.532	126.322	116.231	115.78	131.788	129.179	134.617	158.134	130.974	132.443	112.054	113.973
125.967	126.764	118.258	121.068	122.695	125.262	122.284	126.579	115.589	115.747	132.461	128.645	135.088	158.626	133.025	129.613	111.274	113.78
124.929	127.73	120.064	121.437	122.535	124.245	121.792	126.278	116.144	116.576	133.591	129.801	133.42	160.518	130.654	132.16	111.89	114.236
125.577	126.53	118.622	120.942	122.952	124.635	122.649	125.719	115.738	115.655	135.39	128.09	133.535	161.861	133.722	134.859	111.506	113.765
125.374	128.101	119.421	121.661	122.688	125.08	121.279	126.01	116.429	115.288	133.742	127.032	133.312	160.946	131.568	135.59	111.557	114.062
126.052	127.154	119.081	121.556	122.449	124.809	122.622	126.408	115.995	115.804	132.105	129.272	133.711	159.438	130.038	132.923	111.725	114.3
125.432	126.612	118.575	122.431	122.108	124.48	121.488	126.538	116.068	115.651	132.896	125.481	136.491	159.578	133.487	132.368	111.926	113.982
124.85	126.559	119.697	121.621	122.207	123.836	122.607	126.262	116.44	115.68	133.458	126.409	134.134	159.55	130.825	131.81	112.186	113.471
125.137	126.665	119.539	120.802	122.853	124.705	122.465	126.297	115.879	115.788	133.955	125.981	133.843	155.105	131.642	134.013	112.184	113.763
125.369	126.702	119.735	121.062	122.847	123.659	122.603	127.132	116.625	115.084	135.136	123.615	134.088	161.628	131.646	132.192	111.681	113.453
125.386	127.33	118.793	121.535	122.704	123.717	122.069	126.227	116.86	115.562	133.87	125.37	131.221	161.486	132.848	132.127	112.059	113.811
126.131	128.069	118.259	121.697	122.951	124.191	122.552	126.927	116.19	117.201	131.974	124.884	132.612	157.646	129.938	133.679	112.124	113.794
125.609	127.946	120.364	120.282	123.05	125.065	122.453	127.052	116.136	116.156	134.301	122.799	136.966	159.912	129.103	131.462	111.78	113.529
125.577	127.368	119.278	121.257	121.794	124.783	121.913	127.16	116.193	115.435	130.325	125.16	133.113	158.761	130.603	133.468	111.969	113.296
125.83	128.007	119.979	120.468	122.692	123.998	122.348	126.869	116.346	115.985	132.265	124.682	134.893	158.135	132.642	133.737	111.724	113.38
125.575	128.033	119.905	120.553	122.581	124.179	121.924	126.743	115.235	116.387	134.149	125.29	136.018	158.389	131.342	134.342	111.739	113.432
125.497	126.868	119.186	120.169	122.717	123.557	122.048	126.835	116.217	115.823	130.645	126.784	135.812	159.434	133.641	133.595	111.641	113.071
125.607	127.849	119.337	120.945	123.26	124.096	122.121	126.825	115.413	116.368	131.155	126.689	136.425	160.826	130.608	133.167	112.155	113.139
126.947	126.395	119.149	120.072	122.783	123.546	122.411	126.746	116.479	115.411	131.136	126.439	132.252	156.009	131.551	131.797	112.099	112.662
126.08	127.148	117.962	120.783	122.641	124.752	121.86	127.036	116.539	115.212	131.656	125.231	134.096	157.83	127.551	133.675	111.854	113.604
125.831	127.946	118.349	120.746	123.473	124.777	122.487	127.073	117.145	115.756	132.55	124.298	135.235	158.168	128.949	133.291	112.238	113.266
126.254	127.363	120.29	120.844	123.078	124.304	122.17	127.182	116.567	116.08	133.896	125.442	132.257	156.345	127.138	133.303	112.297	112.804
125.997	127.706	118.11	120.716	122.555	124.404	121.48	128.02	115.485	115.959	132.299	127.273	133.922	159.739	127.608	135.38	112.444	112.989
125.574	127.373	120.534	121.62	122.797	124.443	121.889	127.272	115.591	116.056	131.353	125.412	131.991	161.054	131.538	133.296	112.001	113.204
125.084	127.686	119.13	121.144	122.842	124.477	122.209	126.918	116.292	115.474	134.299	126.813	131.276	161.157	131.063	131.436	112.272	112.286
126.437	127.115	119.944	120.871	123.198	125.054	121.899	126.609	116.687	115.982	133.045	125.878	131.017	160.586	132.125	134	111.923	112.644
125.953	127.507	120.266	120.922	123.256	124.024	122.659	126.827	115.729	115.454	134.186	127.58	136.739	159.885	127.192	131.049	112.357	112.921
126.047	127.876	120.297	120.278	123	124.593	121.919	126.391	116.231	116.235	132.098	126.213	136.196	158.297	130.373	133.553	111.578	112.782
125.65	127.887	120.115	120.763	122.695	124.486	122.093	126.929	116.097	115.914	133.25	128.338	133.612	157.268	127.947	130.886	111.944	112.81
124.878	127.581	119.7	120.697	122.336	124.068	122.087	127.595	116.311	116.498	131.13	126.98	134.558	159.714	129.275	131.628	111.542	112.759
125.837	127.154	120.628	120.688	122.578	124.152	121.473	126.501	116.387	115.703	132.265	127.896	135.434	158.901	130.513	131.756	111.966	113.07
126.221	127.4	120.049	121.413	122.878	124.42	121.385	127.137	116.341	115.884	133.934	126.252	133.561	158.823	130.842	132.139	112.45	112.882
126.56	126.733	120.127	121.251	123.191	124.306	122.22	126.977	116.115	114.58	135.244	126	138.447	155.708	129.938	136.844	111.988	112.817
126.189	127.498	120.23	120.591	122.28	124.013	122.19	127.714	116.453	115.606	135.358	125.122	134.911	157.64	130.936	128.309	112.51	112.654
126.557	127.372	120.834	120.546	122.852	124.205	122.085	127.143	116	115.021	133.634	128.471	133.207	159.459	126.935	131.013	112.068	113.006
126.208	127.365	120.423	121.181	122.485	124.005	121.997	126.754	117.167	115.198	131.147	130.423	132.732	160.664	129.35	129.914	112.016	113.063
126.686	127.236	119.7	122.143	123.199	124.1	122.041	127.368	115.474	114.132	133.712	125.312	131.602	159.297	128.974	132.885	112.045	113.207
126.086	126.408	121.075	121.743	122.353	124.256	122.176	126.742	115.203	115.708	131.552	127.141	133.42	157.696	130.81	133.646	111.805	112.959
126.878	126.885	121.516	121.298	122.115	123.55	121.765	126.878	116.039	114.861	133.523	126.89	135.793	161.177	130.797	134.312	111.929	113.18
126.329	126.817	120.652	121.992	122.49	123.818	121.648	126.859	116.474	115.754	131.721	127.068	138.655	160.088	127.063	131.123	111.953	113.248
126.483	125.539	120.602	121.142	122.673	124.285	121.871	126.61	115.708	115.61	132.911	128.24	133.611	161.885	130.275	133.961	111.668	113.235
126.588	127.429	121.315	121.137	121.936	123.759	121.654	127.529	116.297	115.413	128.993	124.211	135.631	158.009	130.405	131.868	111.71	113.074
126.714	127.242	119.276	120.818	122.534	124.236	122.005	127.219	115.278	115.75	133.727	126.413	134.877	159.646	127.557	133.911	111.599	112.9
125.406	126.684	120.113	120.962	122.166	124.165	122.198	127.216	115.253	116.046	131.045	123.192	134.761	165.204	128.722	131.831	111.906	112.886
126.181	127.476	120.489	121.181	122.676	124.063	121.588	127.657	115.689	115.959	133.309	124.803	131.369	157.901	129.284	132.182	111.75	113.195
126.5	127.125	120.668	121.082	122.525	123.622	122.316	127.562	115.711	116.014	132.305	127.406	134.929	161.205	129.165	133.2	112.066	113.154
125.879	127.386	119.915	121.137	122.735	124.224	122.638	127.011	115.385	116.52	134.929	127.423	134.946	160.188	130.049	130.782	112.11	113.294
127.081	127.332	120.599	122.11	122.945	124.081	121.982	127.987	116.498	116.782	132.833	128.123	137.845	158.491	129.127	132.835	112.177	112.671
126.012	127.614	120.91	120.746	122.006	124.494	122.627	127.927	115.862	116.701	130.89	124.801	136.054	158.687	125.737	132.615	111.995	112.925
126.775	127.77	120.223	121.311	122.332	123.627	121.67	127.564	116.79	116.586	133.782	127.955	135.123	158.561	125.963	133.474	112.388	113.148
126.859	127.738	120.416	121.356	121.94	123.609	121.8	127.187	116.396	116.294	131.429	124.305	132.741	158.043	130.637	132.241	112.112	112.569
127.282	127.063	119.958	120.395	122.248	124.316	123.185	127.267	116.462	116.914	131.235	126.671	132.388	157.897	128.759	129.79	112.314	112.995
126.331	127.151	119.663	121.351	122.033	123.872	122.645	127.165	114.927	116.692	132.007	126.47	137.643	161.598	132.237	131.974	112.7	113.319
126.527	127.09	119.678	120.987	122.678	123.839	121.852	126.662	115.401	117.028	129.04	126.342	133.652	162.611	133.115	132.526	112.501	112.789
126.449	127.228	119.034	121.696	121.826	123.897	122.151	127.004	116.32	115.409	132.818	124.26	134.522	158.565	131.228	132.197	111.811	112.853
125.564	127.847	120.381	121.654	122.727	124.096	122.211	126.81	116.622	116.6	133.227	121.781	136.867	160.115	131.618	131.731	112.463	112.993
126.627	127.138	119.75	121.028	122.238	124.078	122.455	126.848	116.233	115.988	130.484	124.346	133.153	159.568	133.012	130.385	112.868	112.492
127.09	127.292	118.712	122.161	122.344	123.83	122.323	127.404	116.471	115.424	133.616	123.373	134.239	160.354	132.603	132.691	112.176	112.414
126.475	127.743	118.528	120.713	121.789	124.005	122.099	126.371	117.173	116.316	132.378	124.669	134.991	156.684	131.442	134.513	112.708	112.837
126.723	127.702	119.793	121.973	122.476	123.892	122.368	127.315	116.794	116.125	127.774	126.11	131.391	159.864	131.714	132.545	112.583	112.721
126.289	126.815	118.404	120.47	122.953	124.25	122.471	126.958	116.06	115.273	133.026	123.929	136.339	158.775	130.05	132.974	112.144	112.651
126.588	127.952	119.754	121.111	123.075	123.102	122.659	127.252	116.157	116.287	131.747	125.338	135.115	158.991	131.62	136.766	111.95	112.558
126.794	126.68	120.064	122.618	122.233	123.707	122.12	126.588	116.202	115.739	132.455	123.335	134.06	161.847	133.872	135.325	111.408	112.759
126.345	127.581	119.075	121.658	122.746	124.062	121.862	126.851	116.781	116.676	130.287	123.436	134.348	159.044	131.848	130.782	111.566	112.322
127.463	127.98	118.642	122.794	122.652	123.797	122.703	126.107	116.722	116.246	136.188	124.143	134.017	159.714	130.532	132.037	112.522	112.731
127.093	127.018	119.986	122.826	122.375	124.081	121.883	127.312	116.443	116.038	132.045	120.917	133.843	158.728	130.436	129.684	112.342	113.222
127.306	128.053	119.225	121.669	122.561	124.054	121.859	126.841	116.98	116.402	133.45	123.884	133.602	158.405	133.579	136.269	111.33	112.58
125.572	126.787	120.453	121.448	122.167	124.724	121.904	127.009	116.831	115.992	132.136	125.626	134.366	163.044	132.358	134.282	112.193	112.667
126.525	127.39	119.913	121.828	123.115	124.051	122.449	126.863	115.661	115.86	133.429	123.123	133.312	158.365	133.818	132.42	111.858	112.573
127.297	128.465	118.257	121.628	122.513	123.775	122.769	126.08	116.567	116.665	132.916	122.701	137.409	158.772	134.55	135.519	111.994	113.138
126.141	128.05	118.897	121.321	122.796	124.21	122.593	127.353	116.5	115.839	132.026	122.808	132.42	161.345	132.628	132.25	111.583	113.457
127.232	128.4	118.835	121.59	121.759	123.56	121.882	127.043	116.269	116.327	131.49	122.02	134.5	156.634	135.872	136.618	111.737	113.749
127.439	127.824	119.16	122.107	122.606	123.862	122.809	126.097	116.701	116.128	132.981	125.279	135.865	157.405	136.816	130.316	112.078	113.298
127.241	128.385	118.805	122.383	122.92	124.55	121.584	126.741	117.596	115.555	131.445	124.792	131.422	160.396	129.718	131.456	111.886	112.9
127.003	127.824	118.207	122.196	122.309	124.36	122.467	126.727	117.529	115.704	134.5	123.831	133.939	158.965	136.684	133.35	111.846	113.199
127.878	128.158	118.407	121.495	122.01	123.897	122.441	126.858	117.942	115.39	134.708	123.449	135.27	161.237	133.468	134.627	111.68	113.456
128.054	128.511	118.47	121.258	122.246	124.479	122.281	126.718	115.737	117.045	132.477	122.417	132.661	157.461	136	132.538	111.478	113.444
128.059	128.869	119.265	122.439	122.837	123.511	122.191	126.712	116.948	116.925	133.565	121.935	134.553	154.983	137.908	131.628	111.162	113.03
126.587	128.344	118.715	121.902	122.413	123.311	122.411	126.484	116.397	116.094	131.481	126.266	133.079	159.887	135.065	132.321	111.77	113.238
127.438	127.685	118.148	122.476	123.238	123.416	121.685	126.443	116.119	115.552	130.891	124.194	135.577	159.225	133.203	132.671	112.075	113.219
127.261	128.033	119.838	121.312	123.188	123.803	121.933	125.924	116.85	116.195	132.553	122.74	134.027	159.628	133.175	132.747	111.953	113.625
127.13	128.218	119.328	122.457	122.831	124.339	121.58	126.812	116.805	116.239	132.077	121.276	132.638	160.035	133.628	133.671	112.29	113.356
127.517	127.976	118.186	121.451	123.127	124.36	122.135	126.421	116.311	116.593	133.468	126	135.628	162.134	135.013	131.325	111.458	114.062
126.872	127.746	118.947	122.924	122.772	123.789	121.194	126.541	116.256	115.983	131.519	125.286	135.171	157.072	137.273	131.077	111.804	113.862
126.557	128.835	117.989	122.077	122.42	122.813	121.267	127.04	117.103	116.489	130.385	124.019	132.246	157.383	135.13	130.444	111.678	113.407
127.41	127.825	117.626	120.622	122.707	124.227	121.733	127	116.198	115.938	130.808	126.755	135.631	160.912	136.41	132.936	111.616	112.549
127.562	128.418	117.468	121.508	123.289	123.642	121.238	127.024	116.308	116.896	135.032	120.634	134.948	159.531	135.038	132.177	111.92	112.745
127.047	128.701	119.245	121.877	122.664	124.162	121.761	126.977	116.029	115.946	130.181	122.954	133.196	161.678	133.772	133.911	111.918	112.838
126.732	128.106	119.072	120.272	122.587	124.172	122.153	126.094	115.986	116.167	129.585	121.338	132.652	160.464	136.304	133.861	111.357	112.981
126.733	128.289	118.136	120.315	123.2	123.912	121.82	126.831	116.49	116.365	133.955	124.506	135.071	155.761	137.244	134.962	112.042	113.461
126.955	127.723	118.976	121.082	122.887	124.396	121.411	126.214	116.069	115.355	131.161	122.558	136.327	159.148	134.152	133.447	112.362	113.141
126.252	128.098	118.838	120.013	123.118	124.223	121.625	126.481	116.663	115.79	132.51	124.591	136.116	158	136.276	132.185	111.397	113.468
126.541	128.409	118.756	121.134	122.405	123.801	121.273	126.938	116.323	115.707	129.263	125.513	136.643	159.732	134.16	136.039	112.399	112.572
126.748	128.375	119.925	121.464	122.803	124.306	121.881	126.604	116.7	116.116	130.393	122.636	133.391	159.505	134.289	133.43	112.286	113.584
126.19	127.747	120.025	121.123	122.556	123.783	121.834	126.569	115.777	116.139	128.247	124.247	132.796	161.139	133.579	132.4	111.536	113.84
126.858	127.651	120.308	121.199	123.309	123.685	122.773	126.56	116.111	115.155	127.295	124.308	130.595	155.155	133.372	135.802	112.305	113.187
127.065	128.092	118.602	121.845	122.88	123.574	121.772	127.196	116.27	116.415	135.98	122.417	135.568	159.579	135.115	131.038	111.83	113.614
127.69	127.779	119.195	120.912	122.897	124.247	121.421	126.581	116.113	115.521	131.342	124.651	134.56	160.912	131.603	131.842	112.286	112.554
125.89	128.009	118.557	121.697	122.152	123.128	122.107	126.847	116.006	116.056	133.084	124.942	134.965	154.712	134.667	134.925	111.817	113.377
126.692	128.946	120.274	121.052	122.902	123.965	121.534	127.077	115.365	115.451	131.635	122.831	135.602	159.009	131.412	131.282	111.997	113.244
125.789	129.185	118.473	121.263	122.998	124.789	122.028	126.557	115.274	116.242	133.351	123.929	133.036	158.75	135.731	131.3	112.567	113.228
126.753	128.619	120.329	119.679	122.835	124.845	121.382	127.187	116.308	116.326	132.34	122.174	135.821	156.783	135.538	131.961	112.016	113.375
126.529	127.686	118.661	121.672	123.32	124.687	121.633	127.503	116.275	116.03	132.169	123.39	134.982	160.396	133.671	133.338	111.819	112.969
127.421	128.989	119.132	120.307	122.379	124.57	121.677	126.505	115.348	116.859	131.142	123	132.565	157.85	138.231	132.372	112.002	112.783
126.774	128.646	118.788	119.368	123.277	124.336	121.866	126.43	116.492	116.393	132.418	122.795	132.694	160.121	134.175	132.013	112.136	113.251
127.477	128.206	118.663	119.801	123.31	124.355	121.997	127.191	115.544	116.523	130.817	126.768	134.034	161.718	140.051	133.792	112.366	112.729
126.584	128.496	119.119	120.063	122.726	124.859	122.387	127.095	116.971	116.622	130.298	122.245	130.927	159.845	134.667	131.671	112.01	112.729
126.305	128.308	118.871	119.593	122.523	124.602	121.959	126.466	115.556	116.553	129.273	122.686	132.708	156.548	134.154	134.367	112.396	112.394
127.417	128.559	120.061	120.047	122.789	124.324	122.473	127.198	115.954	116.737	133.724	125.623	131.938	159.796	135.551	130.675	111.772	112.4
126.961	128.059	118.482	120.106	122.724	125.282	122.287	127.31	115.076	115.522	134.181	121.435	134.85	158.509	133.372	133.309	111.818	112.615
127.581	128.438	119.604	119.532	122.775	123.988	122.389	126.279	116.604	116.387	132.245	122.149	134.116	157.913	134.228	132.346	111.661	112.574
126.513	128.291	118.574	119.811	123.639	124.407	122.248	126.318	115.505	116.254	134.539	124.458	133.867	157.382	135.987	132.158	111.887	113.037
126.737	128.941	118.692	119.678	122.945	124.379	122.328	126.424	115.991	116.432	133.096	121.564	135.053	159.574	138.444	136.474	112.609	112.368
126.805	128.864	119.606	119.814	123.032	124.317	121.691	125.947	116.338	116.577	129.384	122.406	134.142	157.867	137.615	130.833	112.518	112.825
127.468	129.341	120.501	120.442	123.097	124.514	122.817	127.103	115.674	116.319	137.129	121.928	133.018	161	137.321	135.538	112.063	113.149
126.837	128.999	119.496	119.736	122.724	124.347	122.742	126.218	115.272	116.541	133.801	123.364	134.451	157.8	137.506	132.013	112.422	112.483
128.163	128.841	118.052	119.966	122.838	124.763	122.166	126.368	115.897	115.906	134.084	123.545	133.207	158.835	131.934	131.123	112.564	113.014
128.107	128.847	117.75	119.45	123.031	124.193	122.293	127.055	115.653	117.221	135.439	123.903	134.113	157.301	137.823	132.066	111.795	112.745
128.769	128.815	119.447	120.543	123.543	123.764	122.398	126.857	117.212	116.738	133.342	124.827	133.345	158.548	135.564	133.72	111.859	112.568
127.518	128.206	119.417	120.009	122.724	124.17	122.184	126.97	117.089	116.568	133.154	125.124	130.425	160.67	134.241	131.935	112.175	113.002
127.729	129.164	119.294	120.052	123.365	123.937	122.709	126.597	116.374	117.468	133.162	123.838	132.009	158.381	136.013	130.278	112.405	112.73
126.878	127.67	119.42	119.925	123.923	123.833	123.07	126.895	116.121	116.404	134.248	121.74	134.157	157.063	136.461	134.654	112.168	112.555
127.853	128.506	119.361	119.727	123.587	123.836	122.316	127.743	116.475	116.598	131.755	125.283	133.558	155.922	134.237	131.026	112.145	113.065
127.769	128.84	118.351	120.807	123.834	124.506	122.002	126.115	117.424	116.501	134.606	121.652	131.983	158.773	133.684	133.195	112.471	112.538
128.24	128.967	120.343	119.368	123.584	123.827	122.244	126.082	115.932	115.842	130.869	124.831	134.643	159.407	134.877	133.95	112.549	112.747
128.165	128.847	119.358	120.145	123.179	123.511	122.357	126.68	116.435	115.508	135.954	125.172	136.104	158.919	133.346	134.423	112.653	112.906
128.119	129.332	120.617	119.295	123.775	123.442	122.555	126.949	116.632	115.635	131.358	123.422	131.632	157.553	130.418	130.568	112.707	112.373
127.466	128.624	120.847	120.277	123.788	124.031	121.835	126.994	117.569	116.319	132.439	122.638	132.909	160.896	134.662	134.962	112.337	112.735
128.518	128.412	119.504	119.453	123.907	122.694	122.897	126.325	116.767	116.168	132.568	124.32	131.929	157.248	138.618	136.872	112.554	112.889
127.72	129.011	118.928	118.915	123.371	123.424	121.743	126.72	116.341	115.777	127.844	121.942	133.825	159.619	133.734	136.117	112.861	112.573
127.917	128.882	119.752	119.698	123.621	124.615	122.629	126.751	116.899	117.478	132.742	125.451	133.743	159.045	135.838	134.45	112.889	112.604
127.296	128.486	119.597	119.576	123.158	123.974	122.281	126.684	116.25	115.714	131.213	126.276	135.655	156.125	136.372	135.338	112.261	112.872
126.959	129.43	118.164	120.404	122.843	122.968	122.279	126.854	116.883	116.688	133.639	125.091	134.688	159.159	135.769	135.925	112.047	112.57
127.904	127.723	119.109	118.959	123.802	123.519	121.722	125.999	115.948	115.928	133.677	121.63	134.357	161.554	135.195	136.41	112.354	112.755
127.331	128.187	118.344	120.4	123	123.499	122.401	126.682	116.642	117.037	130.903	123.364	132.802	156.726	135.449	135.128	112.361	112.348
127.16	129.239	118.53	119.713	123.41	123.796	122.039	126.573	116.721	115.854	133.406	123.658	133.596	159.345	132.802	134.068	111.88	113.17
127.25	128.681	118.52	120.151	124.221	123.858	122.26	126.519	117.532	117.435	129.942	123.586	134.991	160.196	131.321	132.065	112.128	111.846
127.892	129.789	118.354	119.441	123.698	124.08	122.839	126.557	117.017	117.693	135.474	122.392	134.589	159.982	133.487	135.75	111.962	112.65
127.663	128.771	118.407	120.114	123.635	123.504	122.583	127.026	116.667	116.316	135.948	125.316	134.293	161.496	135.734	135.487	112.014	112.31
127.939	128.568	117.508	119.522	123.291	123.709	122	127.904	115.935	116.465	131.552	121.923	131.679	158.655	133.684	133.692	112.63	112.87
127.136	128.725	118.944	119.236	123.422	123.972	122.271	126.793	116.976	115.777	132.838	122.671	134.518	161.504	132.092	133.684	112.143	112.655
127.662	128.686	118.81	119.833	123.037	123.121	122.782	127.155	116.44	116.535	132.182	122.4	135.504	158.353	133.064	134.519	112.189	112.598
126.828	128.416	118.405	119.103	123.256	123.144	122.659	127.024	116.317	116.333	131.916	123.058	132.637	160.505	135.734	131.456	111.702	112.309
127.92	128.451	118.54	119.506	123.013	123.718	121.948	127.425	117.925	116.884	132.91	125.078	133.562	158.384	131.564	131.128	112.561	112.826
126.504	128.15	118.211	120.424	123.222	123.1	121.876	127.189	116.103	116.41	132.445	126.897	134.922	159.429	132.325	131.354	112.028	112.495
127.006	128.338	118.373	120.81	122.557	123.832	121.514	127.088	116.118	116.251	128.865	123.142	124.948	161.099	135.838	131.487	112.336	113.278
127.33	128.019	117.544	121.073	123.184	123.488	122.26	127.443	116.162	117.257	128.429	123.365	132.062	157.518	135.238	130.416	112.097	112.837
128.3	128.612	118.048	119.73	122.751	123.659	122.251	126.861	116.363	116.89	128.351	124.104	133.626	158.407	132.2	133.725	112.097	112.579
127.121	128.507	117.946	119.829	122.939	123.4	121.909	126.943	117.129	116.585	130.15	121.195	129.676	159.434	132.949	130.901	112.143	112.38
127.869	128.699	118.185	118.47	123.16	122.973	121.778	127.255	116.775	115.993	128.555	123.013	130.274	160.673	135.59	132.114	112.431	112.673
127.06	128.083	118.212	119.467	123.227	124.139	123.063	127.54	116.74	116.529	132.884	123.776	133.676	160.509	135.859	134.623	112.246	112.503
127.641	128.33	116.944	118.644	123.452	123.841	122.907	126.463	116.954	117.13	129.169	124.038	134.83	159.345	136.861	133.885	111.778	112.457
127.206	129.362	118.67	119.789	123.002	123.751	123.14	126.299	115.964	116.643	129.942	121.103	135.426	162	135.179	132.295	111.742	112.565
127.41	129.398	119.112	119.457	123.423	123.749	122.744	126.333	116.229	116.624	132.87	120.895	134.918	157.211	137.158	136.937	111.825	112.684
127.333	128.598	118.713	119.487	122.848	123.351	122.268	126.153	115.798	117.607	131.877	120.737	132.938	158.223	132.744	132.709	112.568	112.201
126.709	128.273	118.189	121.051	122.683	123.764	122.17	126.824	116.161	117.348	130.85	121.967	133.391	159.637	135.113	132.861	111.796	112.564
127.934	128.264	118.679	119.815	122.859	123.562	122.649	126.633	116.277	116.491	133.13	120.147	133.018	160.892	131.287	133.051	111.761	112.369
127.062	128.072	117.797	119.892	122.652	123.423	122.05	126.809	117.183	116.099	126.613	123.201	132.974	159.614	134.192	134.436	112.265	112.506
125.689	128.248	118.711	119.316	122.646	123.767	122.236	126.359	115.936	117.438	129.953	121.578	133.217	160.696	135.179	131.835	112.718	112.791
127.853	128.405	118.189	120.671	123.496	122.917	122.508	126.857	117.163	116.181	129.266	120.801	135.009	160.223	136.553	133.421	112.54	112.614
127.217	128.853	118.018	119.634	122.499	123.413	123.031	126.28	116.207	117.431	130.604	121.705	131.853	159.183	134.397	131.256	112.381	112.453
127.385	128.331	118.746	119.937	122.526	122.898	122.245	126.478	116.478	116.823	129.091	123.987	133.239	159.369	133.136	134.886	112.415	112.791
127.678	129.048	118.362	120.189	122.863	123.347	122.921	126.943	116.393	117.273	129.013	127.819	134.3	161.096	135.038	135.462	112.596	112.387
126.714	128.416	118.622	119.449	122.837	122.761	122.749	125.778	116.835	116.773	131.858	123	133.527	161.491	135.829	133.321	112.426	112.538
127.006	128.794	118.003	119.052	122.74	123.212	122.641	125.703	115.666	116.712	127.748	124.255	132.991	160.766	130.051	130.076	112.321	112.6
127.487	128.409	117.732	118.994	123.587	123.421	122.672	125.77	117.153	117.03	129.118	123.941	132.575	158.278	131.295	130.269	112.606	112.718
127.412	129.337	116.904	119.02	123.523	123.185	122.958	126.34	116.42	116.634	128.033	124.104	132.312	158.026	134.557	132.59	112.653	112.885
127.557	128.598	118.511	119.577	122.793	123.437	122.197	126.816	116.182	117.132	133.61	124.423	131.297	156.708	135.241	130.713	112.286	112.669
128.01	128.481	119.404	119.327	123.336	123.146	121.995	125.573	117.797	116.586	127.577	124.465	131.034	158.237	130.538	134.532	112.224	112.595
128.081	128.144	118.103	118.703	122.959	123.331	122.082	126.693	117.198	116.494	127.735	125.5	133.852	158.405	132.688	135.901	112.233	112.554
126.893	129.367	119.629	120.609	123.635	123.688	122.692	126.508	116.485	116.828	131.513	122.903	133.416	157.104	133.753	132.637	112.304	113.011
127.991	128.028	118.218	120.327	123.062	123.571	122.126	126.222	116.151	116.405	130.303	124.026	134.139	161.089	135.974	131.013	111.995	112.64
126.893	127.986	119.915	120.297	122.732	123.155	122.574	126.189	116.381	116.772	127.006	124.045	133.704	160.036	133.139	133.519	111.706	113.074
127.188	128.552	119.96	119.881	122.806	123.471	121.91	125.869	116.8	117.264	131.195	129.058	130.577	158.955	134	131.85	111.896	112.678
127.127	128.33	118.516	120.178	123.511	123.759	122.997	126.239	117.033	115.838	127.149	121.808	133.259	159.946	133.297	133.436	111.642	113.119
128.778	128.34	118.36	120.086	122.752	123.714	122.56	125.506	116.402	116.14	129.497	123.305	130.487	160.629	135.346	134.846	111.768	113.383
128.223	127.652	118.936	120.195	123.14	123.57	123.262	125.65	117.034	116.148	128.409	121.686	132.25	157.441	135.295	131.38	112.223	112.545
127.552	128.594	119.274	118.976	123.112	123.359	123.409	125.733	116.5	116.584	129.669	125.59	135.124	155.93	134.449	132.37	112.122	112.656
128.029	128.474	119.924	118.429	123.009	123.015	123.534	125.537	118.06	116.265	127.617	122.718	131.743	158.649	133.291	135.595	111.941	112.167
127.38	128.703	119.094	119.87	122.849	123.394	122.249	125.953	116.717	117.018	127.649	125.126	131.698	157.009	131.205	135.3	111.844	112.629
127.891	128.826	118.546	118.972	122.664	123.767	123.166	125.879	115.841	116.311	129.261	122.458	132.227	162.795	134.039	133.5	111.423	112.57
128.162	128.482	117.928	118.558	123.516	123.808	122.941	125.873	116.539	116.249	129.401	121.877	132.372	159.045	134.821	137.101	111.629	112.63
127.592	128.348	118.533	118.828	122.823	123.99	122.676	125.481	118.19	115.615	126.813	124.404	134.527	158.054	133.782	132.203	111.815	113.023
127.083	128.143	118.769	119.584	122.984	123.526	123.755	125.926	115.831	116.158	125.889	121.253	133.713	157.891	131.152	134.455	111.789	112.987
127.285	129.438	119.346	118.831	122.78	123.871	123.364	125.949	116.818	117.97	124.955	121.955	134.072	156.078	132.101	133.408	112.105	112.84
127.784	128.812	118.219	118.929	122.835	124.003	122.469	125.541	117.281	116.211	123.748	119.897	130.91	159.124	135.359	134.675	112.302	112.447
127.243	127.971	117.724	119.582	122.689	123.462	122.442	125.998	117.444	116.03	126.832	122.186	134.938	158.829	136.25	130.795	111.667	113.588
127.463	130.102	118.262	118.917	122.917	123.97	122.358	125.39	116.098	117.636	125.11	119.688	131.626	162.389	132.141	133.803	111.51	112.746
127.062	128.233	118.925	119.833	122.612	123.512	122.683	126.077	115.889	116.782	124.449	121.404	132.58	158.17	131.718	132.608	111.866	112.749
126.692	129.323	117.777	120.037	122.464	123.602	122.963	125.984	116.228	116.603	126.032	120.156	131.426	155.768	134.222	128.962	111.823	112.456
127.326	129.063	118.336	119.591	122.857	123.458	123.051	126.082	117.279	116.512	124.591	122.845	132.743	155.139	133.436	136.988	111.525	112.624
127.49	128.847	118.135	119.504	122.466	123.447	122.983	126.182	116.568	115.431	124.701	121.895	133.661	159.904	134.545	132.488	111.747	112.906
128.224	128.047	118.161	119.785	123.025	123.474	123.007	126.048	116.67	116.814	124.756	123.701	133.195	157.513	136.382	129.469	111.574	113.208
127.287	129.251	118.752	119.32	122.423	123.398	123.189	125.138	116.5	116.532	125.468	121.271	130.469	156.912	135.926	131.423	111.512	113.181
126.953	128.539	118.13	120.545	123.446	123.573	122.917	125.239	116.632	116.469	125.161	123.065	131.126	157.122	135.103	132.316	111.782	113.184
127.469	129.47	117.797	120.437	122.883	124.32	122.508	126.076	116.779	116.978	125.929	123.578	132.383	158.06	135.383	134.089	111.831	113.136
127.429	128.971	118.055	120.427	122.289	123.795	123.113	125.817	116.934	116.905	125.348	120.658	131.429	159.198	138.115	137.368	111.846	113.364
127.31	129.265	117.904	119.925	123.159	122.976	123.481	126.047	117.028	116.574	124.737	124.006	132.991	159.351	133.457	135.882	111.393	113.22
127.072	129.58	118.811	120.281	122.921	123.871	122.848	126.15	116.853	115.721	125.756	121.662	129.15	160.902	134.16	138.238	111.391	113.689
127.192	129.498	117.558	120.35	122.431	123.805	122.189	125.411	116.509	116.314	125.578	125.467	132.743	161.181	135.273	137.253	111.581	113.551
128.573	129.617	117.513	120.179	122.843	123.485	123.311	125.414	117.424	117.25	129.154	125.192	131.672	158.889	134.962	133.162	111.67	113.627
128.176	128.597	117.415	119.903	122.979	123.477	122.801	125.666	116.939	116.551	128.747	126.173	132.887	158.009	133.221	139.387	112.255	113.507
126.589	129.126	118.1	119.853	122.671	123.895	123.658	125.766	116.31	117.088	127.413	124.19	130.681	158.791	133.551	136.557	111.673	113.873
127.801	129.07	117.797	120.135	123.343	123.877	122.667	125.914	117.401	117.091	125.735	120.182	130.748	157.284	133.282	135.923	112.554	113.773
127.818	129.645	118.701	120.594	122.845	123.967	122.903	125.348	116.21	117.503	126.324	124.564	132.46	158.295	134.436	136.077	111.859	113.755
128.642	129.034	118.044	120.441	123.063	124.144	122.646	124.884	117.446	115.889	123.768	126.461	131.491	156.652	134.474	136.922	111.651	113.727
127.263	129.849	117.496	121.578	123.095	124.14	123.031	125.092	116.99	116.367	128.935	123.308	132.339	158.939	135.855	135.802	111.574	114.066
127.354	129.841	117.935	119.796	123.035	124.59	122.475	125.539	116.511	116.946	127.331	124.396	133.161	160.814	134.526	137.91	111.846	113.737
126.392	129.803	118.112	120.186	122.962	123.883	123.227	125.348	116.944	116.887	127.266	123.323	132.035	160.351	133.42	136.782	111.59	113.979
128.109	129.015	118.206	121.198	122.548	124.242	122.6	125.221	116.946	116.76	126.872	122.429	132.509	156.177	134.256	136.691	111.415	113.96
127.56	130.037	117.673	121.571	123.262	123.486	122.301	125.736	117.427	116.68	126.795	123.702	133.283	157.974	137.636	137.272	111.443	114.04
126.868	130.69	117.841	120.624	123.357	124.209	122.535	124.906	117.393	117.138	126.381	126.856	132.586	159.372	135.532	136.21	111.451	114.2
126.978	130.292	117.477	120.15	122.938	123.687	122.644	125.506	116.909	117.516	126.444	125.084	131.411	158.486	137.633	140.076	111.532	113.65
127.487	129.559	117.433	119.789	123.303	124.542	122.879	125.494	117.311	116.88	127.142	125.346	134.704	159.322	136.59	136.115	111.849	113.873
127.796	130.417	118.023	119.999	123.497	123.642	122.741	125.485	116.633	117.413	127.391	126.142	135.719	157.848	134.769	140	110.988	114.384
128.025	129.364	117.522	120.732	123.179	124.209	123.288	125.541	117.975	116.397	126.458	126.545	135.104	160.442	137.364	135.316	111.284	113.84
127.075	129.234	117.76	119.71	123.059	123.268	122.407	125.481	117.422	116.657	127.48	121.045	133.894	158.035	137.714	134.556	112.112	113.868
126.779	129.12	118.052	120.413	122.82	123.791	122.442	125.253	116.77	116.592	127.771	124.083	134.297	159.027	136.846	135.049	111.873	113.493
126.107	128.92	118.398	121.035	123.898	123.501	123.069	125.751	116.908	116.597	127.853	123.968	134.93	157.938	135.078	137.895	111.776	113.257
127.321	129.806	118.4	120.4	123.345	123.957	122.2	126.003	117.233	117.346	124.974	121.994	131.956	159.184	135.716	137.829	111.829	114.068
126.221	128.681	117.75	118.94	123.204	124.674	122.819	125.942	115.837	116.439	127.019	120.201	133.009	156.909	133.026	135.506	112.423	112.957
127.499	129.858	118.573	120.191	122.634	123.736	122.07	125.785	116.683	117.41	128.351	122.917	132.209	159.018	139.551	137.346	111.766	113.236
127.453	128.653	117.241	118.726	122.916	123.717	122.939	125.053	117.023	115.969	125.961	120.218	134.64	161.351	133.259	135.538	111.796	113.768
126.454	129.404	118.348	120.649	123.937	123.217	122.442	125.768	116.572	116.828	127.435	122.506	132.956	158.956	131.506	135.615	111.384	113.129
127.222	128.979	119.109	120.41	123.37	123.831	123.045	125.345	115.961	116.467	126.745	121.797	132.92	163.345	134.462	136.936	112.269	113.149
126.652	129.512	118.464	119.948	123.303	123.863	122.079	126.032	115.602	117.001	129.284	121.968	133.116	159.87	134.346	135.637	112.574	114.107
127.72	129.48	118.122	119.035	123.489	123.438	122.654	125.384	116.215	116.566	128.84	121.526	133.202	159.832	134.55	135.766	111.555	113.307
127.905	128.857	118.014	120.918	123.651	122.984	122.23	125.83	116.711	116.067	125.503	121.052	135.833	162.647	135.382	137.205	112.12	113.379
127.085	129.176	118.856	119.895	123.625	123.628	123.062	125.168	116.964	117.163	126.619	122.232	134.071	157.173	136.818	138.618	112.199	113.723
126.817	129.324	118.299	121.183	122.572	123.867	123.23	125.466	117.112	116.224	127.181	124.831	133.374	158.857	133.346	135.203	111.335	113.364
128.005	130.015	118.378	120.912	122.755	123.647	122.683	125.884	116.589	116.439	123.766	122.542	133.607	159.696	133.198	137.076	111.675	113.686
126.753	129.289	116.874	120.206	123.089	123.241	123.213	125.739	116.843	117.296	127.679	122.305	134.85	158.957	133.628	139.278	111.874	113.224
127.597	130.363	118.91	120.685	123.303	124.133	123.19	125.789	116.612	117.139	128.14	127.782	134.748	157.938	134.077	136.532	111.571	113.339
127.011	129.355	119.097	119.86	123.608	124.198	122.385	126.041	117.52	117.186	128.173	125.756	134.455	158.496	136.038	134.679	111.411	113.419
127.182	129.585	118.169	120.266	123.223	123.925	122.46	125.445	116.38	116.744	125.935	122.487	132.922	157.898	138.179	137.57	112.045	113.991
126.913	128.346	118.785	120.955	124.527	123.466	122.223	125.555	115.959	115.907	127.237	121.442	132.973	160.268	135.642	135.938	111.818	113.515
128.275	128.713	118.195	120.086	123.674	124.013	122.47	125.657	116.485	116.413	128.065	124.606	132.607	160.261	138.474	137.782	112.107	114.393
127.16	129.696	118.384	121.199	123.687	123.555	122.081	125.44	116.423	116.319	126.587	121.981	132.245	160.321	133.899	135.42	112.053	114.054
126.783	129.303	118.953	120.629	123.526	123.308	121.947	126.358	116.395	116.569	127.423	122.935	130.557	159.313	137.385	140.895	112.077	114.27
126.247	128.667	118.144	119.7	123.431	123.768	122.172	125.241	117.316	116.847	126.578	123.289	132.955	157.619	134.092	134.765	112.284	114.116
126.545	128.915	119.15	121.123	123.801	123.696	122.511	125.808	116.25	116.521	126.179	128.545	134.727	160.44	135.962	137.333	112.513	114.011
126.911	128.868	119.168	120.605	122.802	123.682	122.565	126.098	117.485	117.205	129.616	125.258	133.069	159.982	135.963	133.925	112.069	114.507
125.938	128.971	118.635	120.867	123.975	124.065	122.537	125.588	117.353	115.603	124.567	123.656	133.42	160.304	137.449	137.526	111.899	114.815
127.033	129.501	119.214	120.78	124.868	123.439	122.481	127.039	116.924	116.681	126.252	122.71	135.071	157.211	135.833	142.312	112.487	113.793
126.96	128.6	119.242	121.736	124.097	124.169	122.198	126.262	117.172	116.672	126.503	123.519	133.559	156.711	135.234	137.5	112.215	114.222
127.303	128.74	118.97	121.085	124.24	123.394	122.37	125.879	116.849	115.878	126.929	124.468	133.25	156.696	137.577	136.58	112.113	114.083
127.472	128.885	118.613	120.956	123.533	123.772	122.382	125.707	117.277	116.544	126.836	121.292	130.814	160.619	133.247	139.065	112.596	114.118
127.617	128.938	118.855	120.556	124.064	124.055	122.508	126.524	116.904	116.576	127.691	122.792	131.336	159.619	135.224	135.385	112.12	114.216
128.062	128.87	118.444	120.533	124.419	123.573	122.024	125.85	118.255	117.548	127.066	124.223	132.557	157.527	137.395	135.829	112.846	113.668
128.195	128.281	118.409	119.709	124.243	123.765	122.781	125.955	116.544	116.356	126.725	124.123	133.313	159.133	131.731	135.863	112.521	113.304
127.649	128.405	119.115	120.851	123.651	123.485	122.139	126.068	116.728	116.041	128.684	123.051	137.321	157.165	133.392	136.547	112.401	113.744
128.672	128.648	120.152	120.403	123.944	123.456	122.39	126.293	116.876	116.222	127.26	122.275	129.652	158.947	135.818	137.851	112.252	113.202
127.385	128.461	119.829	120.487	123.769	123.439	122.274	126.28	116.917	116.524	127.75	128.26	132.495	156.676	132.938	135.679	112.343	113.934
128.132	128.952	119.726	120.155	124.117	123.107	122.86	126.497	117.683	116.863	124.667	123.245	130.296	158.328	134.481	139.051	112.218	114.216
126.74	128.034	119.302	119.064	123.566	123.506	123.191	126.398	116.875	116.111	126.667	123.207	132.628	159.73	134.038	134.244	111.872	113.723
126.935	128.264	119.513	120.323	123.936	123.395	122.376	126.578	117.447	116.573	127.172	124.513	131.593	156.805	133.564	136.359	112.201	113.348
127.442	129.453	118.293	119.231	124.479	123.96	123.462	125.796	117.674	116.6	129.51	121.564	131.957	159.278	132.289	139.41	112.235	113.175
127.418	129.394	118.808	119.935	123.694	122.974	122.365	126.056	116.48	116.646	128.497	123.799	130.793	157.575	134.947	138.697	112.869	113.276
128.863	128.287	118.628	119.649	124.554	122.808	122.547	126.31	117.783	117.079	127.41	122.132	132.8	157.983	133.852	135.469	112.093	113.997
128.129	128.311	118.929	120.445	123.814	123.042	122.942	125.898	116.635	115.875	127.045	126.336	133.099	157.088	133.148	134.688	112.989	113.143
127.693	129.145	118.677	120.525	124.122	122.813	122.113	126.078	117.027	116.978	128.902	121.974	131.405	160.297	132.662	132.975	112.474	113.368
128.366	129.149	119.326	121.53	124.7	122.895	122.339	126.523	118.297	116.781	129.288	122.947	134.767	157.223	134.333	139.571	112.603	112.971
127.697	128.17	118.983	120.444	124.019	122.286	122.728	127.052	116.726	115.745	126.948	123.079	133.252	158.25	131.886	135.148	112.229	113.297
127.299	130.014	118.355	120.321	124.583	122.895	122.633	126.136	116.918	116.329	127.845	124.868	130.009	161.133	136.104	135	112.211	113.808
128.274	129.676	118.855	120.709	124.705	123.465	122.072	126.815	116.654	116.481	127.468	125.422	130.973	158.239	134.494	136.494	112.413	113.846
128.004	128.96	118.924	120.914	124.423	123.483	122.672	126.268	118.053	115.88	128.013	122.838	130.124	158.217	134.84	134.013	112.182	113.799
127.644	129.197	118.209	122.272	124.896	123.237	122.24	125.673	116.799	116.8	126.141	123.549	130.531	160.126	134.037	136.474	112.347	114.148
126.681	129.444	119	121.923	124.484	123.122	122.204	125.539	116.581	116.664	127.027	123.679	133.652	160.164	131.185	136.628	112.532	113.58
127.376	129.568	118.595	121.935	124.415	122.742	122.897	125.91	116.523	117.365	127.364	122.284	134.283	158.018	135.469	137.494	112.114	113.8
127.103	129.454	119.003	121.321	124.899	123.135	122.92	125.731	116.995	116.689	126.323	123.154	133.893	161.336	134.259	136.923	112.112	114.068
127.021	128.164	118.168	121.662	124.968	123.402	122.314	125.839	117.019	114.958	125.684	124.247	133.351	160.448	134.714	137.658	111.912	114.109
127.561	129.421	117.485	122.037	124.446	123.777	122.357	125.376	117.163	116.014	125.221	123.89	132.696	161.063	134.025	135.429	111.94	114.194
127.13	129.491	117.418	121.068	125.022	123.765	122.487	125.324	117.775	116.259	128.152	125.245	131.113	157.08	136.051	134.875	112.147	113.105
128.482	129.846	117.31	122.263	124.998	123.832	122.191	125.767	117.336	116.613	125.192	126.052	130.655	157.216	136.188	137.111	111.666	113.987
128.563	129.249	118.199	122.377	123.446	123.242	121.412	125.723	117.149	116.111	125.781	125.684	135.593	160.398	134.012	137.765	112.087	113.658
128.625	129.156	118.734	121.076	124.489	123.375	122.432	126.005	116.867	117.607	126.974	124.084	130.009	159.369	132.203	139.564	112.066	114.003
127.276	128.253	117.127	121.44	124.192	124.494	122.457	125.187	116.673	116.274	127.091	123.258	132.539	159.422	133.39	134.848	112.043	113.525
128.091	129.907	118.016	122.168	124.537	123.324	122.291	125.886	117.566	116.415	125.716	124.673	134.387	160.514	135.872	138.039	112.088	113.451
127.906	129.447	117.517	121.444	124.204	123.485	122.249	126.562	116.573	116.511	127.273	124.032	132	159.983	133.779	135.705	112.191	113.921
127.83	129.152	118.246	122.017	124.683	123.564	121.682	126.385	117.383	116.684	126.76	125.045	133.125	159.328	132.859	134.595	111.865	114.255
127.953	129.041	117.77	122.235	124.878	123.383	122.413	125.624	116.207	116.418	125.929	123.084	131.621	159.658	136.795	134.077	111.848	114.196
128.137	130.315	118.412	123.078	125.167	123.058	122.531	125.921	116.842	116.861	124.877	124.839	135.591	158.174	128.16	136.513	111.884	113.91
127.629	129.815	117.506	121.943	124.866	123.462	122.174	125.922	116.635	117.421	124.968	123.916	131.983	160.387	132.808	133.564	112.379	114.192
127.988	130.016	118.319	122.837	124.7	122.945	123.116	126.24	117.444	116.722	128.419	123.897	133.171	158.009	129.877	134.136	112.133	113.277
127.677	129.782	117.966	121.237	124.728	122.853	122.774	125.603	116.877	116.495	125.5	126.561	132.232	159.217	133.938	134.951	111.707	114.405
127.288	129.58	118.386	121.983	123.569	123.093	122.394	125.991	117.617	116.902	126.712	125.935	135.64	156.768	131.859	131.21	111.68	114.63
129.004	130.197	117.837	120.801	124.265	123.383	122.257	126.756	117.131	117.194	125.348	123.935	135.018	157.043	136.244	136.936	110.565	114.206
128.801	130.181	117.421	121.174	124.617	123.147	121.476	126.434	116.206	116.346	124.039	127.34	134.491	158.47	132.12	133.91	111.424	114.162
127.995	129.688	117.88	122.682	124.744	123.332	122.29	126.096	117.143	116.937	124.75	126.303	133.625	159.586	130.41	134.038	112.174	113.632
128.394	129.561	119.006	121.976	124.699	123.145	122.094	125.482	116.707	116.367	127.065	124.513	136.673	158.619	131.628	135.705	111.258	113.671
127.867	129.606	117.285	122.001	124.093	124.054	121.896	125.49	115.858	116.206	124.769	124.903	137.372	157.165	132.481	137.141	111.467	113.671
128.474	130.16	117.718	121.134	124.7	123.308	121.751	125.526	116.931	117.274	125.961	125.325	134.112	156.336	131.772	135.938	111.995	114.064
127.258	128.618	117.345	121.194	123.338	122.96	122.64	126.143	116.323	116.892	127.247	124.327	135.297	159.357	133.099	137.684	111.411	113.914
129.051	129.442	117.647	121.271	124.715	123.543	121.739	126.049	118.084	116.195	128.297	125.627	136.043	159.817	133.064	135.553	111.476	113.687
128.903	128.981	117.386	121.299	124.409	123.576	121.804	125.567	117.455	117.442	127.123	126.548	135.912	157.73	131.827	135.5	111.768	113.336
[truncated: 1,272 more rows]

## Sheet: AIB activated; RIB cell body
135.372	131.552	135.44	224.785	214.852	213.887	180.582	177.951	183.6	184.245	182.051	182.667
[truncated: 1,707 more rows]

[truncated: 2 more sheets: No ATR; RIB Process, note]
