# Supplementary material for: Flexible motor sequence generation during stereotyped escape responses
Source: eLife journal article supplement (doi:10.7554/elife.56942), 2020-06-05
Supplement: supp [file Figure 4-source data for r2 compare in Figure 4A-B.xlsx]

## Sheet: Sheet1
type-2 rate compare & KS test for Fig 4A right and Fig 4B right
Fig 4A right
time bin		0s-1s	1s-2s	2s-3s	3s-4s	4s-5s	5s-6s	6s-7s		test
Control	end with type-2	0	4	6	19	25	15	11
	other	85	81	75	56	31	16	5			total distribution	type-2 distribution
eat-4(ky5)	end with type-2	0	2	13	26	8	4	1		p-value from KS test	6.18428e-07
	other	54	52	39	13	5	1	0
p-value		1	1	0.0047	1.84089e-05	0.3597	0.342	1
time bin		0s-1s	1s-2s	2s-3s	3s-4s	4s-5s	5s-6s	6s-7s
Control	end with type-2	0	4	6	19	25	15	11
	other	85	81	75	56	31	16	5			total distribution	type-2 distribution
Tetx	end with type-2	1	7	10	7	10	5	2		p-value from KS test	0.0008	0.0026
	other	43	36	25	17	7	2	0
p-value		0.3411	0.04236	0.00241177	0.710314	0.305333	0.4103	1
Fig 4B right
time bin		0s-1s	1s-2s	2s-3s	3s-4s	4s-5s	5s-6s	6s-7s
Control	end with type-2	0	4	7	8	13	4	8
	other	67	63	55	47	34	30	22			total distribution	type-2 distribution
Triple mutant	end with type-2	8	21	17	16	18	5	3		p-value from KS test	9.4648e-08	5.93032e-08
	other	85	63	45	29	11	6	2
p-value		0.02122	0.001794	0.03929	0.0143895	0.00302549	0.02751	0.297
