# Supplementary material for: Flexible motor sequence generation during stereotyped escape responses
Source: eLife journal article supplement (doi:10.7554/elife.56942), 2020-06-05
Supplement: supp [file Figure 5-source data for Figure 5-figure supplement 1B.xlsx]

## Sheet: Pmec-4  ChR2;Psto-3  HisCl
Raw data for Figure 5 - figure supplement 1B
worm name	turn	duration time (s)	date
20181009 w1	1	1.302	20181009
	1	1.651
	0.5	2.926
	0.5	2.394
	1	4.108
w2	0	2.119
	1	2.033
	0	3.23
	0.5	2.18
	0	1.878
	0	3.572
w3	1	3.149
	1	3.225			Summary
	1	2.03			no response	11	pause	1	all	313
	no res		0		%	0.0351438		0.00319489
	1	3.477
	0.5	3.274
	0	1.483
w4	1	3.104
	0.5	2.756
	1	4.512
	1	4.375
	1	3.058
	1	3.326
	0	3.302
	1	4.603
	0	4.566
	0	1.812
w5	0	3.633
	0	2.301
	0	7.166
	0	3.362
	0	2.075
	0	1.695
w6	1	2.104
	0	3.063
	1	3.805
	0	1.635
	0	1.968
w7	1	2.332
	0	3.377
	0.5	4.123
	0	3.997
	1	3.814
	0	4.415
	0	3.968
	1	3.784
	0	5.081
	1	4.587
	0	1.787
	0	4.825
	1	5.956
w8	1	2.937
	1	2.998
	no res		0
	0	1.514
	1	3.537
	1	3.926
	0	3.265
	0	3.075
	0	0.909
w9	0	2.136
	0	1.877
	0	1.276
	0	1.968
	no res		0
w10	1	2.997
	1	4.648
	0.5	3.64
	1	3.674
	1	2.06
	1	4.022
	1	3.527
	0	4.694
w11	0	0.258
	0	1.579
	no res		0
	0	0.314
	0	3.911
	0	1.211
	0	1.498
	0	0.605
w12	1	2.527
	1	3.709
	1	3.179
	1	3.441
	0	4.345
	0	3.603
	0	3.128
	0	3.421
	0	2.341
	0	1.574
w13	1	3.195
	1	3.351
	0	3.557
	1	3.837
	0	3.866
	1	3.346
	1	2.56
	1	2.998
	1	4.375
	0	3.362
	1	3.937
	1	6.329
w14	0	2.256
	0	3.185
	0	2.015
	0	4.997
	0	0.621
	0	1.861
	0	1.846
w15	0	2.937
	1	3.653
	1	3.816
	0.5	3.028
	1	5.164
	1	3.291
	1	5.399
	0	2.741
w16	0	2.664
	1	3.679
	1	2.382
	1	5.208
	1	4.375
	0	4.099
	0	4.754
w17	1	3.679
	1	3.482
	1	3.471
	1	2.882
	1	2.802
	0	3.043
	1	4.195
	1	3.028
	1	3.209
	0	5.329
	0	4.637
	0	3.826
	0	5.355
w18	1	2.3
	1	3.634
	1	3.164
	1	2.649
	1	3.936
	1	3.785
	1	3.407
	1	2.589
	1	5.203
w19	1	2.18
	1	3.603
	0	3.755
	0	4.194
	0	3.512
	0	2.07
w20	1	3.965
	1	1.968
	1	3.315
	1	3.769
	0	1.696
w21	0	2.801
	0	3.487
	1	3.572
	0	1.63
	0	2.27
	0	1.221
	0	1.024
	0	1.408
w22	0.5	4.072
	0	2.679
	1	6.925
	1	4.012
	0	4.936
	0	0.803
	1	4.626
	0.5	3.94
	0	1.964
	0	1.605
w23	no res		0
	no res		0
	0	0.378
	1	1.377
	1	2.453
	0	1.858
	1	2.872
	0	1.428
w24	no res		0
	1	3.226
	0	1.645
	0	1.666
20180628W1	1	2.135
	1	3.393
	0	2.463
	1	6.718
	0	2.438
	0	2.392
	0	2.65
	0	3.653
W2	0	2.103
	1	2.005
	0	0.863
	1	2.64
	1	2.584
	1	2.12
	0	5.899
	0	7.353
	0	2.002
	0	4.951
w3	0	2.089
	0	2.272
	1	3.315
	1	2.565
	1	4.511
	1	5.289
	0	5.596
w5	0	1.969
	0	0.985
	0	2.822
	1	2.301
	1	3.014
	1	3.541
	1	2.739
	1	3.452
	0	6.54
	0	2.407
w7	1	2.786
	1	3.188
	1	3.113
	1	2.392
	1	2.341
	1	2.825
	1	3.774
	0	3.188
	0	4.769
w8	1	2.393
	1	2.845
	1	3.165
	0	2.701
	1	2.993
	1	2.841
	0	2.512
	1	3.658
	0	2.376
w9	1	3.154
	1	2.21
	1	3.503
	0	1
	1	3.436
	0	2.436
	0	3.952
w10	0	0.378
	0	5.153
	1	2.755
	1	4.34
	0	4.814
	pause
	0	2.211
w11	1	3.779
	1	3.016
	1	2.606
	1	4.719
	0.5	3.387
	0	3.84
	0	2.651
	0	4.194
	0	3.027
	0	2.422
	0	2.194
	0	2.437
	1	5.868
w12	0.5	8.414
	1	3.178
	1	6.374
	0	5.591
	0	7.055
w13	1	2.407
	1	3.062
	1	3.443
	0	6.244
w15	0	10.514
	0	10.4
	1	9.7
	0	6.971
	0	5.658
	1	4.86
	0	0.242
W16	1	6.101
	1	4.445
	0	2.857
	1	6.545
	1	4.486
	1	4.452
	0	3.931
	1	4.849
	0	4.335
w18	0	3.178
	0	2.962
	0	3.337
	0	4.123
	0	3.805
	0	4.279
	1	2.645
	1	2.693
	0	4.723
w20	no res		0
	no res		0
	1	3.044
	1	1.681
	no res		0
	0	2.272
	no res		0
	1	3.94
	0	1.651
	1	0.681
