# Supplementary material for: Flexible motor sequence generation during stereotyped escape responses
Source: eLife journal article supplement (doi:10.7554/elife.56942), 2020-06-05
Supplement: supp [file Figure 5-source data for Figure 5B.xlsx]

## Sheet: Summary
For Figure 5B
Summary
worm name	n	n of response	n of turn	sig	p value	prob of turn		reversal length	sem	sig	p value		neuron		laser
RIB::Chrimson1	65	64	61			0.938462		1.31439	0.17453				rib		7s red 2.00
RIB::Arch	83	83				1
RIB::Chrimson2	beforeDLPON	trails	F	B	B+T	T	F+T	sum	TURN	Pro of TURN	FORWARD	Pro of FORWARD
	B	82	26	1	11	36	8	82	55	0.670732	26	0.317073
worm name	n	response	rate	lower	upper
RIB::Chrimson	65	61	0.938462	0.849867	0.98298
RIB::Arch	83	83	1	0.956529	1

## Sheet: RIB_Chrimson 2
Raw data for Figure 5B
		during DLP on
worm	state before	F(forward)	B(backward)	B+T	T(turn)	F+T	duration of reversal
w1	P	1
w1	B(Backward)				1		0.318
	B	1
	B				1		0.12
	B	1
	B				1		0.803				summary
	B				1		0.228
	P	1									fluorescent intensity
	B				1		0.045				1.00mW/mm2				B+T	T	F+T	sum	TURN	Pro of TURN	FORWARD	Pro of FORWARD
															14	3	2	54	19	0.351852	36	0.666667
	F	1									beforeDLPON	trails	F	B	11	36	8	82	55	0.670732	26	0.317073
w2	F	1									F	54	34	1	0	0	0	0	0		0
	B	1									B	82	26	1	4	0	1	14	5	0.357143	10	0.714286
	P	1									T	0	0	0
	B	1									P	14	9	0
	B				1		0.65
	B				1		0.454
	B					1
	B	1
	B				1		0.999
	B				1		0.318
	P	1
	F			1
	B				1
w3	B				1		0.393
	B				1		0.135
	B				1		0.711
	F	1
	B				1		0.21
	F			1
	B				1		0.136
	B			1			3.861
	F			1
	B	1
	F	1
w4	B				1		0.242
	B	1
	B	1
	F	1
	B				1		0.893
	F			1
	F	1
	B			1			4.24
	B			1			2.664
	F		1
	F	1
	B			1			2.709
	F	1
w5	B	1
	B	1
	B	1
	F	1
	P	1
	B				1		0.167
	B			1			1.196
	F	1
	P	1
	F	1
	B	1
	F	1
w6	F	1
	F			1
	B				1		0.378
	B	1
	B				1		2.529
	F	1
	F	1
	F			1
	B				1		0.197
	F	1
	F	1
w7	F	1
	F	1
	B				1		0.666
	B	1
	F	1
	F				1
w8	F	1
	B	1
	T				1
	F			1
	B				1		1.09
	B	1
	B	1
	F	1
	B	1
w9	B			1			1.606
	P					1
	B				1		0.377
	B				1		0.211
	P			1
	P			1
w10	B				1		0.183
	F	1
	F	1
	F					1
	F	1
	F				1
	B					1
	B				1		0.332
	B					1
w11	F					1
	F	1
	B					1
	P	1
	B	1
	B				1		0.47
	B		1
w12	F	1
	B					1
	B			fbt			4.633
	B	1
	B				1		0.12
	B	1
w13	B				1		0.046
	B					1
	T				1
	B				1		0.257
	B				1
w14	T				1
	B			fbt			2.013
	F			1
	F			1
	F			1
	P			fbt
	F			1
	F			fbt
w15	B			fbt			4.268
	B	1
	B	1
	B	1
	B	1
	B				1		0.06
	P	1
w16
w17	F				1
	F			fbt
	B					1
	F			1
	F	1
	P			1
	B					1
	F	1
	F	1
w18	F	1
	F	1
	F	1
	F	1
	B			1			0.925
	B				1		0.14
	B				1		0.383
	B				1		0.671
	B	1
	P	1
	B			fbt
							0.978341
							1.25229
							44

## Sheet: RIB_Arch
worm	state before	during DLP on	after DLP on
w1	forward	pause	f
	f	p+reversal	f
	f	p	f
	f	p+r	f
	r	p+f	f
	f	p+r	f
	f	p+r+f	f
	f	p+r	f
w2	f	p	f
	f	p+r	r
	f	p	f
	f	p+r	f
	f	p	f
	f	p	f
	f	p	f
	f	p	f
	r	r+p	f
	f	p	f
	f	p	f
	f	p	f
w3	f	p	f
	f	p	f
	f	p	f
	f	p	f
	f	p	f
	t	p	t
	f	p+f	f
w4	f	p+r	f
	f	p+r	f
	f	p	f
	f	p+r	r
	f	p+r	r
	f	p+r	f
w5	f	r	f
	f	r	r
	f	r	r
	f	r	r
	f	r	r
	f	p	f
w6	f	r	r
	f	r	r
	f	r	f
	f	r	r
	f	r+p	f
w7	f	p	f
	f	p	f
	f	p	f
	f	p	f
w8	f	p	f
	t	p	f
	f	p+r	f
w9	f	p	f
	f	p	f
	f	p	f
	f	p	f
	f	p	f
	t	p	f
	f	p	f
	f	p	f
	f	p	f
w10	f	p	f
	f	p	f
	f	p	f
	f	p	f
	r	p+r	f
	f	p	f
	f	p	f
w11	f	p	f
	f	p	f
	f	p	f
	f	p	f
	f	p	f
	f	p	f
	f	p	f
w12	r	p	t
	f	p
	f	p
	f	p
	f	p
	f	p
	f	p
	f	p+r
	r	r+p
	r	r+p
w13	f	p
	f	p
	f	p
	f	p
	r	r
W14	r	r
	f	p
	f	p
	r	r
	f	p
	r	r
	r	r
	r	r
	f	p

## Sheet: RIB_Chrimson1
worm name	no res	slow down	reversal +slow forward	long reversal	reversal+pause	reversal+turn	turn	reversal duration
20170413w1	1
			1					0.762
							1	0
						0.5		0.985
						0.5+1		1.06
			1					1.423
						2		0.514
						1		5.516
w2						2		0.726
						2		0.807
						2		1.071
						1		3.275
						2		1.151
						1		4.461
w3						1		0.646
						2		0.687
						2		0.545
						2		0.605
						1		2.261
w4						2		0.768
						2		2.201
						2		1.636
						2		1.237
						1		1.777
w5						3		1.454
						2		1.554
						1		2.704
						2		0.202
						2		5.673
						0.5+1		2.746
						1		6.682
w6							1	0
						3		0.727
						1		1.15
						0.5+2		1.13
						2		2.604
						2*0.5		1.252
w7						1		2.058
						1		0.947
						1		1.03
							1	0
						1		2.048
w1-1						1		0.968
								0
							1	0
						3		0.666
							1	0
							3	0
						1		0.848
							2	0
							3	1.252
w1-2							4	0
							3	0
							2	0
							1	0
						0.5+1		1.008
							2	0
							2	0
w1-3						3		0.968
						3		1.373
						3		1.374
						2		0.625
						2		2.423
						1		2.563
						2		1.978
