# Supplementary material for: Flexible motor sequence generation during stereotyped escape responses
Source: eLife journal article supplement (doi:10.7554/elife.56942), 2020-06-05
Supplement: supp [file Figure 5-source data for Figure 5C.xlsx]

## Sheet: Pmec-4  ChR2; Psto-3  Arch
Raw data for Figure 5C
worm name	turn	duration time (s)	date
20190123 w1	1	7.54	20180809
	1	3.947
	1	5.767
	1	4.451
	1	5.404
	1	5.404
	1	5.944
							Summary
	1	6.343					no response	12	response	161	all	173
w2	1	3.891
	0	3.21
w3	1	3.336
	1	3.955
	1	2.933
	1	5.223
	1	6.692
	1	10.818
	1	7.084
w4	0	0.273
	1	8.054
	0	10.577
	0	1.484
w5	0	0.408
	0.5	4.532
	1	8.176
	1	9.216
	0	1.767
w6	0	5.107
	0	4.93
	0	1.72
	0	3.709
	0	1.075
w7	1	2.876
	1	3.573
	1	4.245
	0	7.096
	1	4.445
	1	3.724
	1	12.404
	1	8.327
w8	0.5	3.724
	1	6.923
	1	9.568
	1	9.156
	0	6.461
w9	1	2.8
	1	6.661
	1	5.829
	1	8.721
	1	9.913
	0	1.998
	0	1.826
w10	0.5	4.739
	1	6.469
	1	8.439
	0	0.561
	1	15.659
	1	11.229
	1	11.849
	1	12.975
w11	1	4.185
	1	9.866
	1	13.126
w12	1	5.939
	1	6.052
	1	5.263
	1	5.108
	0	1.729
	0	1.58
w13	1	15.554
	1	11.137
	1	14.046
	1	15.669
	1	14.091
	1	7.614
w14	1	6.051
	1	6.355
	0.5	3.36
	0	7.554
w15	0	4.366
w16
	0	3.952
	1	8.054
	0	0.727
	0	11.385
	0	6.752
	0	1.166
20190222 w1	0	1.529
	0	0.743
w2	1	10.438
	1	6.797
	1	4.057
	1	7.009
	1	4.452
	0	5.146
w3	1	2.67
	1	3.936
	1	5.465
	0	2.407
	0	1.452
	0	0.834
w6	1	11.43
	1	5.97
	1	6.596
	1	8.993
	1	8.368
	1	17.336
	1	4.921
	1	11.959
w7	1	9.196
	1	8.226
	1	9.948
	1	7.146
	1	13.137
	1	13.303
	1	12.274
	0	12.883
	1	11.718
w8	0	4.955
	0	2.966
	0.5	3.089
	0	1.681
	0	0.756
	0	1.332
w9	1	5.077
	1	6.576
	1	7.056
	0	2.057
	0	5.406
	1	7.163
	1	6.887
	0	3.771
w10	1	2.696
	0.5	3.714
	1	6.949
w11	1	3.785
	0	0.636
w13	1	4.184
	1	7.353
	1	13.627
	1	9.291
	1	13.786
	1	8.156
	1	9.704
w14	0	4.072
	1	7.347
w15	1	4.829
	1	4.864
	1	6.385
	1	5.225
	1	4.578
	0	0.666
w16	1	2.545
	1	3.482
	0	1.513
	0	1.558
	1	4.45
	0	1.272
	1	4.028
	0	1.272
w17	1	5.179
	1	5.298
	1	5.813
