# Supplementary material for: Flexible motor sequence generation during stereotyped escape responses
Source: eLife journal article supplement (doi:10.7554/elife.56942), 2020-06-05
Supplement: supp [file Figure 5-source data for Figure 5F.xlsx]

## Sheet: Summary
For Figure 5F
	n	reversal length	SEM	p value U-test	multi
Pmec-4::ChR2	594	2.5831	0.053253
Pmec-4::ChR2;Psto-3::miniSOG	77	4.2257	0.31749	3.6954e-08	7.3908e-08
Pmec-4::ChR2;Psto-3::TeTX	122	3.5792	0.19698	1.6511e-06	3.3022e-06

## Sheet: Pmec-4_ChR2+RIB_tetx
Raw data for Figure 5F
Date	worm name	turn?	reversal duration
20190606	w1	1	2.614
		NO response
		1	2.928
		1	4.309
		0	1.419
		0	0.858
		NO response
	w2	1	3.936
		1	2.574
		1	2.966
		1	4.588
		0	0.847
		0	0.848
		NO response
		1	5.981
		No response
	w3	0	2.881
		0	4.071
		0	2.83
		1	6.606
		0	3.918
	w5	1	2.256
20190611	w6	1	5.586
	w7	1	2.332
		0	3.8
		1	4.39
		0	1.394
		0	3.467
		0	0.317
		0	1.317
	w8	1	2.62
		1	2.226
		1	3.664
		1	3.436
		1	2.529
	w10	1	5.042
		1	6.131
	w11_1543	0	3.738
	w11_1548	0	4.617
		NO response
		1	4.223
	w12	1	11.527
		1	8.19
		0	1.531
20190614	w1	1	3.043
		1	3.336
		1	4.331
		1	4.769
		NO response
		0	0.257
	w2	0	2.015
		0	1.636
		0	1.455
		0	1.455
	w3	0	9.583
		1	5.617
	w4	1	3.422
		1	6.176
		1	6.903
		1	2.649
		1	5.572
	w5	1	7.48
		1	14.155
	w6	0	5.132
		1	6.493
		0	5.888
		0	8.325
		0	4.255
		0	1.242
	w7	0	2.694
		1	1.135
		NO response
		NO response
		1	1.179
		no response
	w9	0	4.558
		0	3.241
20190616	w1	1	3.739
		0	1.877
		1	3.405
		1	7.267
		0	4.269
		0	1.514
		0	1.726
		0	2.287
	w2	0	2.241
		1	2.528
		1	3.578
		1	4.345
		1	2.618
		1	2.724
		1	2.136
		1	2.195
		0	1.514
	w3	1	7.01
		0	1.649
		0	1.469
		0	0.363
		NO response
	w4	0	2.286
		0	5.875
		0	4.891
		NO response
		1	4.103
		0	3.164
		1	4.135
	w5	1	3.723
		1	2.711
		1	2.361
		1	4.315
		1	3.119
		1	2.921
		1	2.136
		1	5.028
		1	5.525
	w6	1	2.635
		1	3.679
		1	2.996
		1	4.861
		0	2.757
		1	2.876
		1	2.134
		0	0.832
	w7	1	2.695
		1	3.769
		NO response
		1	4.289
		0	0.576
	w8	1	3.663
		1	3.543
		1	2.709
		NO response
		1	2.817
		1	2.786
		1	3.8
		NO response

## Sheet: Pmec4-ChR2+RIB_minisog
Date	worm name	duration	turn?					* 0.05	**0.01	***0.001	****0.0001
20190124	w1	2.997	1
		1.544	0
		2.927	1
		7.298	1
		5.289	1
		7.212	1
	w2	1.27	0
		0.869	0
	w3	0.788	0
		5.668	1
		4.168	1
		2.952	6
		4.087	2
		1.786	0
	w4	1.074	0
		2.842	1
		1.786	0
	w5
		3.548	1
		10.814	1
		14.401	1
		7.555	0
	w6	2.716	1
		3.201	1
		3.537	1
		2.771	1
		2.861	1
		4.789	1
		1.666	0
		2.337	1
	w8	2.619	1
		6.086	1
		5.541	1
		5.662	1
		9.957	1
		4.175	1
		11.824	1
	w9	4.274	1
		4.815	1
		7.009	1
		11.818	1
	w10	2.549	1
		1.988	1
		4.073	1
		3.377	1
		1.458	0
		5.794	1
	w11	2.848	1
		4.107	1
		2.68	1
		0.469	0
		4.118	1
		5.425	1
		1.529	0
		0.878	0
	w12	3.375	1
		2.765	1
		3.529	0
		3.675	1
20190305	w1	3.362	0	4.32689
		5.556	1
		5.526	1
	w2	0.863	1
		3.195	1
		11.424	1
	w3	3.276	1
		2.903	1
		5.086	1
		1.756	1
		6.464	1
		3.846	0
		6.262	1
		5.906	1
	w4	2.79	1
		4.202	1
		3.451	1
		2.104	0
		4.239	0

## Sheet: Pmec-4_ChR2
worm name	duration of reversal	turn
20160719W1
	3.149	1
	3.649	1
	4.769	1
	3.255	0
	3.239	0
W2	2.665	0
	2.028	1
w4	3.286	1
	3.241	1
	1.937	0
	2.801	0
	3.3	1
	1.368	0
	0.848	0
	3.496	0
	0.954	0
	5.027	1
	1.015	0
	3.497	0
	1.182	0
	1.513	0
	1.241	0.5
	4.684	0
W5	3.169	0
	3.982	0
	4.026	0
	3.225	0.5
	5.298	0.5
	5.45	1
	4.754	1
	1.257	0
	3.407	0
	1.226	0
w6	3.133	1
	0.453	0
w7	4.42	1
	4.723	1
	5.571	1
	4.029	1
	3.753	0
	3.18	0
	3.892	0
	3.3	0
	1.815	0
	3.952	1
	1.893	0
w8	3.74	0.5
	2.194	0
	1.649	0
	2.936	1
	0.242	0
w9	2.347	1
	1.256	0
	3.815	1
	5.343	1
	2.332	0
	3.95	1
	2.498	0
	1.801	0
	5.435	1
	0.65	1
	1.166	0
20160728w1	2.801	1
	5.133	0
w2	3.376	1
	0.682	0
	3.845	1
	4.709	0
	4.224	1
	3.513	0
	1.122	0
	3.466	1
	1.56	0
	0.303	0
w3	4.876	1
	1.196	0
	3.36	0
	5.435	1
	4.648	1
	3.892	1
	0.377	0
w2	4.057	1
	2.815	1
	3.725	1
	3.012	1
	3.83	0
	3.119	0
	3.679	1
	1.65	0
	4.603	1
	0.819	0
	6.569	1
	4.906	1
	5.813	1
	1.543	0
	1.62	1
	1.621	0
	1.227	0
w3	4.027	1
	1.075	0
	0.544	0
w5	1.788	0
	4.498	1
	4.117	1
	1.558	0
	4.922	0
	4.74	1
	1.832	0
	4.481	1
	1.5	1
	5.132	1
	1.044	0
w6	4.753	1
	3.043	1
	4.012	0
	3.558	1
	3.845	1
	2.379	1
	3.013	1
	6.72	1
	2.982	1
	3.759	0
	4.814	0
	3.497	1
	3.255	0
	3.224	1
	0.317	0
w7	1.664	0
	2.151	0
	5.95	1
	3.589	0
w10	0.227	0
	3.859	1
	0.226	0
W11	4.3	1
	1.528	0
	1.257	0
	0.591	0
	0.288	0
W12	0.635	0
	1.892	1
	1.212	1
	3.223	1
	6.055	1
W14	4.134	1
	1.303	0
	5.51	1
	0.787	0
	1.317	0
	1.03	0
	4.132	1
	1.242	0
	0.575	0
	0.242	0
	3.68	1
	0.379	0
	0.456	0
	0.561	0
20160802W1	2.559	1
	2.998	0
	1.379	0
W2	2.074	0
	2.286	1
	3.376	1
	3.452	1
	2.86	1
	2.089	0
	3.526	1
	2.786	1
	1.24	0
	3.936	1
	1.756	1
	1.863	1
	3.012	1
	1.589	0
	2.605	0
	1.801	1
	1.363	0
w4	2.786	0
	1.439	1
w5	4.209	0
	3.997	1
	0.877	0
	2.241	0
	1.318	0
	3.15	1
w6	2.877	1
	2.544	0
	2.286	1
	2.393	1
	2.423	1
	2.105	0
	1.878	0
	2.709	1
	3.286	1
	4.33	1
	3.007	0
	2.711	1
	3.89	0
	3.363	1
	3.028	1
	3.361	1
	3.769	0
	2.12	0
	1.408	0
	3.875	1
W7	4.39	1
	1.407	0
	3.315	1
	3.225	1
	4.814	1
	1.545	0
	2.815	1
	4.043	1
	2.302	1
	2.716	1
W9	1.773	1
	4.86	1
	2.317	0
	2.149	0
	3.057	1
W10	3.089	0
	4.072	1
	3.635	1
W11	3.509	1
	3.861	1
	3.483	0
	2.863	1
	3.209	1
	2.724	0
	3.982	0
	1.059	0
	2.533	0
	3.617	1
	3.331	1
	2.986	1
	0.514	0
	1.085	0
	3.453	1
	1.046	0
w12	5.905	1
	1.104	0
	1.134	0
	0.985	0
	1.273	0
20170719W1	3.351	1
	3.693	1
	1.999	1
	3.27	0.5
	2.279	1
	2.846	1
	3.695	0.5
	5.097	0
W5	2.039	1
	6.242	0
	1.292	0
	1.171	0
w7	2.221	1
	2.887	1
	0.949	0
	0.343	0
	0.606	0
W9	1.454	1
	2.867	1
	1.641	0
	3.753	1
	1.677	0
	0.525	0
W10	2.342	0
	2.16	1
	3.113	1
	2.765	1
	2.119	1
	4.116	1
	5.147	1
	1.291	0
W13	2.993	0.5
	3.351	1
	3.774	0.5
	1.212	0
	3.393	1
	4.501	1
	4.523	1
	4.947	1
	4.582	1
W14	1.554	0
	5.532	1
	1.109	0
	1.412	0
	0.788	0
W15	1.636	0
	0.324	0
	3.457	1
	0.202	0
20180518 w1	4.783	1
	2.917	1
	2.383	1
	2.377	1
	2.125	0
	2.18	0
w6	2.8	0
	2.103	0
	2.644	1
	3.074	1
	3.573	1
	3.391	1
	3.165	1
	2.372	1
	0.696	0
w8	2.786	1
	2.291	0
	2.543	0
	1.969	0
	2.558	1
w11	2.523	0
	2.467	0
	2.151	1
	3.466	1
	2.348	0
	3.23	0
	2.084	1
	2.024	0
	2.498	1
	2.432	1
w12	1.867	1
	3.533	0
	2.26	0
	2.437	0
	2.195	0
	3.238	1
	2.529	1
	3.226	1
	4.434	0
	3.104	0
w13	1.847	0
	0.959	0
	2.453	0
	1.866	1
	1.786	1
	3.462	1
	1.62	1
	2.361	0.5
w14	1.786	1
	1.543	1
	3.27	1
	2.968	1
	1.599	0
	3.558	1
	1.515	0
	2.272	0
w15	3.102	1
	2.761	1
	2.361	1
	2.635	0
	2.226	1
	2.528	0
	1.69	1
	2.19	1
	2.883	1
	2.65	1
	2.12	1
	0.773	0
w18	2.387	1
	3.401	0
	0.135	0
	1.788	1
	2.135	1
	2.726	1
	3.118	1
	4.173	1
	0.984	1
	4.582	1
w20	1.846	0
	1.076	1
	1.408	1
	0.288	0
	1.726	1
	1.5	0
	2.058	0
	2.074	0
	0.803	0
w21
	1.166	0
	4.755	0
	3.149	1
	1.791	0
	2.981	1
	3.164	1
	2.558	0
	2.948	0
w22
	1.502	0
	1.635	1
	3.347	1
	0.923	1
	1.863	0
	0.94	0
	3.341	1
	1.19	1
	1.121	1
	2.801	1
w23-1	2.498	1
	1.125	0
	2.802	1
	3.201	1
	3.421	1
w23-2
	1.75	1
	1.651	0
	2.559	1
w26	1.212	1
	0.541	0
	2.952	0.5
	1.664	0
	1.544	1
	2.483	1
	0.741	0
	1.166	0
	0.363	0
w27	2.408	0
	1.899	0
	3.23	0
	2.942	1
	4.145	1
	3.604	1
	4.118	1
	4.375	1
	2.618	1
	4.587	1
w28	1.923	1
	1.815	0
	0.483	0
	1.852	0
	0.516	0
	4.225	1
	3.149	1
	1.605	0
	1.591	0
W30	1.346	0
	2.316	0
	2.696	0
	3.36	1
	2.938	0
	3.317	1
	2.771	1
	1.848	0
	2.043	0
W31	1.029	1
	0.273	0
	0.999	0
	2.089	0
	3.008	1
20180525 w4
	1.014	0
	3.225	1
	2.685	1
	3.623	1
	0.454	0
w9	3.386	1
	1.863	0
w10	0.65	0
	0.959	0
	0.954	1
	0.675	0
	3.789	1
	1.77	1
	2.891	1
	2.285	1
	2.675	1
	3.21	1
w11	1.076	0
	0.858	0
	3.053	0
	2.043	1
	4.92	0
	1.524	0
	0.562	0
	3.481	1
	2.287	1
	1.576	1
	2.317	1
	0.743	0
	0.909	0
	1.785	0
	0.923	0
20180529 w1	1.549	1
	2.225	1
	1.467	0
	0.728	0
	0.908	0
	1.475	0
	0.892	0
	1.963	0
	0.864	0
w8	1.876	1
	1.06	1
	1.937	1
	1.313	0
	2.149	1
	1.529	1
	2.634	1
	2.119	0
	1.332	0
w14	3.301	0
	2.119	0
	3.73	1
	3.018	0
	4.103	0
	4.264	1
	4.45	1
	3.649	1
	4.253	1
w17	2.543	0
	2.111	0
	2.499	1
	6.653	1
	2.962	1
	3.966	1
	3.175	1
	2.997	0
	2.257	0
	2.668	1
	2.805	0
20180601w2	2.451	0
	3.476	1
	3.039	1
	1.513	0
	3.346	1
	2.584	1
	1.908	1
	1.943	0
	2.755	1
	1.403	0
	1.015	0
	3.171	1
	2.189	1
w4	2.255	0
	5.167	1
	2.584	1
	2.635	1
	3.844	1
	2.613	1
	3.128	1
	3.347	1
	2.644	1
	3.019	0
	3.831	1
	0.303	0
	4.71	1
	4.078	1
	2.891	0
w5	1.887	0
	2.412	1
	3.457	1
	1.56	0
	3.786	1
	3.074	1
	2.264	1
	2.241	0
w8	1.985	0
	3.588	1
	3.416	1
	2.305	1
	0.454	0
	2.649	1
	3.205	1
	2.363	1
	2.104	1
	2.423	1
w9	1.231	0
	3.392	1
	3.377	1
	2.423	0
w12	0.515	0
	1.377	1
	3.509	1
	4.103	1
	0.166	0
	2.406	1
	0.303	0
	3.88	1
w13	2.302	0
	3.518	1
	2.744	1
	3.241	1
	3.184	1
	3.482	1
	4.38	1
	2.029	0
	4.012	0
	2.933	0
w15	0.242	0
	0.983	0
	2.21	1
	2.079	1
	2.786	1
	4.483	1
	0.338	0
