# Supplementary material for: Flexible motor sequence generation during stereotyped escape responses
Source: eLife journal article supplement (doi:10.7554/elife.56942), 2020-06-05
Supplement: supp [file Figure 6-source data for Figure 6B.xlsx]

## Sheet: Summary
For Figure 6B
worm name	reversal length	sem	p-value U-test	multi p-value	sig		n	turn num	turn rate	turn p-value	multi			experimental condition
AIB::ChR2	3.6036	0.29881					49	39	0.795918					1.5s blue laser 1.5
WEN0843(QW1097_quan0199)	6.6106	0.44999	1.109e-05	3.327e-05	****		73	48	0.657534	0.0975893	ns		20190424	1.5s blue laser 1.61 +12s green laser 2.59
worm										p value	multi	no turn num	no response
ctr	2.45107	0.06847					385	192	0.498701			193
ventral(RIV SAAV) ARCH QW889	3.58069	0.24348	1.1311e-06	3.3933e-06	****		61	14	0.229508	8.921e-05	0.00026763	47
head(RIV SAAD SAAV SMB) ARCH QW889	5.87383	0.38647	9.1157e-22	2.73471e-21	****		86	18	0.209302	5.47592e-06	1.64278e-05	63	5

## Sheet: AIB  ChR2
Raw data for Figure 6B
worm name	reversal length	frame of turn start
20170309w1	1.09
	4.164	5591
	6.565	8670
	2.074	12145
	8.17	16675
	4.193	19857
	6.132	22154
w2	4.911	600
	1.166	3976
	4.133	6964
	3.815	10234
	4.687	12584
	7.303	14467
	3.269
	5.163	21022
	3.877	23170
	2.624	25382
w3	8.507
	1.378
	2.488	6559
	1.137	9719
	0.607	13018
w6	5.012	434
	3.113
	1.15
	1.273
	1.939
	7.964	12835
	1.806	15286
w5	5.356	7170
	2.847	10640
	1.785	11494
	1.24	14438
	2.514	17176
	4.27	19834
	1.453	22987
w7	2.11
	3.365	2551
	3.57	6620
	2.832	8358
	0	10080
	1.952	12095
	3.452
	4.387	18304
w8	5.207	379
	4.724	3372
	6.909	7498
	4.274	11774
	4.617	16046

## Sheet: AIB  ChR2;Plim-4  Arch
worm	TURN	REVERSAL LENGTH
20190424w1	0	7.344
	1	3.437
	0	10.129
	0	5.587
	0	4.346
	0	7.07
	1	6.192
	0	10.43
w2	1	8.66
	1	6.95
	1	9.433
	1	8.69
	1	5.905
	1	7.827
	0	3.166
	1	4.966
w3	1	1.892
	1	4.042
	1	4.952
	1	4.875
	0	5.798
w4	1	3.512
	0	2.013
	1	7.177
	1	3.27
	1	5.827
	0	2.678
	0	3.512
	1	2.255
w5	1	1.513
	1	2.726
	1	3.209
	0	13.339
	1	11.935
	1	7.101
w6	0+1	3.087
	1	4.481
	1	2.605
	0	5.012
	1	3.831
	1	5.904
	1	4.132
	0	13.022
	1	6.904
	1	1.741
w7	0.5	4.739
	0.5	6.981
	1	6.57
	1	3.89
	1	9.81
	1	8.311
	1	8.995
	0	12.278
	0	13.116
	0	13.595
	0	13.036
	0	11.264
w8	1	7.086
	1	8.721
	1	10.129
	1	8.372
	0	13.58
	0	14.139
	0	14.867
	0	15.262
	0	2.165
w10	1	2.469
	1	3.376
	1	1.529
	1	3.316
	0.5	2.341
	1	9.084
	1	1.074

## Sheet: Thermal stimulus
reversal length
without turn	with turn
0.505	0.842
0.591	0.955
0.728	0.995
0.747	1.147
0.748	1.195
0.753	1.216
0.772	1.391
0.787	1.529
0.798	1.539
0.803	1.736
0.833	1.793
0.873	1.933
0.874	1.973
0.912	2.07
0.938	2.079
0.948	2.129
0.954	2.164
0.978	2.252
0.978	2.322
0.98	2.412
0.988	2.507
1	2.524
1.01	2.524
1.019	2.635
1.019	2.686
1.02	2.745
1.029	2.776
1.029	2.887
1.029	2.887
1.03	2.962
1.039	3.141
1.039	3.291
1.05	3.296
1.07	3.316
1.071	3.427
1.084	3.443
1.09	3.664
1.11	4.466
1.11	4.526
1.12	4.587
1.125	5.26
1.13	6.979
1.137	1.06
1.176	1.079
1.186	1.08
1.192	1.136
1.196	1.191
1.263	1.192
1.288	1.276
1.301	1.373
1.302	1.403
1.332	1.428
1.344	1.432
1.382	1.489
1.468	1.584
1.478	1.596
1.488	1.685
1.49	1.786
1.494	1.943
1.529	2.05
1.599	2.226
1.645	2.323
1.656	2.336
1.685	2.352
1.685	2.371
1.716	2.431
1.726	2.438
1.735	2.442
1.767	2.443
1.827	2.514
1.852	2.529
1.861	2.543
1.933	2.555
1.99	2.568
2.029	2.578
2.069	2.579
2.079	2.599
2.151	2.704
2.236	2.726
2.345	2.744
2.356	2.764
2.923	2.775
2.932	2.786
3.175	2.831
3.452	2.841
3.461	2.856
4.76	2.861
0.536	2.862
0.715	2.873
0.801	2.973
0.853	3.007
0.919	3.053
1.05	3.205
1.055	3.224
1.079	3.315
1.091	3.381
1.15	3.447
1.15	3.508
1.152	3.559
1.179	3.618
1.256	3.698
1.283	3.774
1.303	3.784
1.317	3.794
1.347	3.885
1.352	3.925
1.352	3.986
1.362	4.074
1.374	4.097
1.383	4.416
1.389	4.422
1.392	4.471
1.444	4.541
1.489	4.608
1.498	4.649
1.524	4.658
1.56	4.718
1.609	4.89
1.644	4.929
1.655	5.011
1.655	5.077
1.665	5.137
1.697	5.272
1.735	5.562
1.736	5.808
1.745	6.259
1.747	6.55
1.765	6.716
1.766	7.367
1.777	1.296
1.777	1.493
1.786	1.539
1.786	1.684
1.798	1.851
1.801	1.892
1.812	1.902
1.862	1.978
1.863	2.028
1.883	2.08
1.899	2.119
1.923	2.175
1.949	2.185
1.957	2.187
1.984	2.21
2.005	2.236
2.048	2.25
2.085	2.262
2.088	2.312
2.09	2.325
2.093	2.401
2.1	2.412
2.118	2.443
2.13	2.473
2.161	2.479
2.239	2.483
2.266	2.538
2.342	2.538
2.438	2.539
2.479	2.62
2.483	2.649
2.58	2.706
2.584	2.714
2.69	2.726
2.791	2.817
2.807	2.83
2.826	2.923
2.845	2.954
2.861	2.999
2.872	3.079
2.931	3.128
2.952	3.16
2.973	3.275
2.992	3.361
3.026	3.463
3.069	3.503
3.151	3.569
3.179	3.598
3.216	3.614
3.452	3.805
3.452	3.87
3.452	4.001
3.522	4.077
3.548	4.31
3.588	4.481
3.609	4.537
4.118	4.784
4.274	5.269
4.421	5.374
4.577	5.456
4.87	5.501
4.88	5.666
4.942	8.1
	9.382

## Sheet: Thermal stimulus;RIV Arch
date	worm	turn?	duration of bwd
20190123	w1_1719	0	3.269
		1	2.333
		1	3.663
		0	0
		0	0.848
		1	0.953
		0	1.031
		0	2.242
		0	0.71
	w2	0	2.579
		0	3.225
		0	2.681
		0	1.105
		1	6.329
		0	3.361
		0	1.423
	w3	1	5.769
		1	4.224
		0	0
		0	1.21
		1	2.905
		1	6.328
		0	2.649
		0	3.92
	w4	1	4.088
		1	3.916
		0	4.298
		0	3.108
		1	2.786
	w5	0	1.288
		1	5.648
		0	5.762
		0	6.803
		0	5.051
	w6	0	6.181
		0	3.769
		0	4.828
		0	4.375
		0	3.088
	w7	0	3.079
		0	4.961
		0	3.397
		0	3.287
		0	2.346
		0	5.521
		0	3.144
	w8	0	3.649
		1	0
		0	0.409
		0	2.952
		0	3.37
	w9	0	4.542
		0	3.801
		0	4.719
		0	5.056
		1	6.247
		0	7.096
		0	3.665
		0	6.798
		0	6.813
		0	5.824

## Sheet: Thermal stimulus;Plim-4 Arch
worm name	turn?	duration of bwd	date
w1	1	9.764	20190227
	0	9.871
	0	14.13
	0	14.256
	0	5.224
	0	8.035
	0	9.691
	0	11.522
	0	9.946
w2	0	3.664
	0	3.103
	0	3.27
	0	3.255
	0	3.559
w3	1	3.572
	1	3.942
	0	6.696
	0	6.525
	0	3.603
	0	3.225
w4	0	3.97
	0	3.18
	0	3.013
	0	3.62
	0.5	2.893
w5	0	5.042
	0	3.236
	0	6.369
	0	2.286
		0
w6	1	5.506
	0	5.744
	1	5.883
	0	6.248
	0	8.519
	0	10.628
	1	5.825
	0	8.972
	0	8.212
	0	10.977
	0	10.789
	1	0.786
	0	0.318
w7	0	5.908
	0	6.077
	0	9.368
	0	9.321
	1	7.233
w8	0	3.443
	1	5.825
	0	5.396
	0	5.137
	1	10.113
	0	5.557
	1	9.507
	0	12.153
		0
w9		0
	0	4.108
	0	18.4
w10	0	1.232
	1	3.789
	0	1.058
	0	3.105
	0	11.396
w11	0	6.01
	1	5.3
	0	3.007
	0	6.236
	0	9.805
	0	3.285
w12	1	6.506
	1	5.711
	0	6.769
	0	4.734
	0	8.897
	0	8.497
w13	0	6.839
	0	4.693
		0
w14	1	3.18
	0	3.928
	0	3.582
		0
	1	6.86
	0	4.315
