# Supplementary material for: Flexible motor sequence generation during stereotyped escape responses
Source: eLife journal article supplement (doi:10.7554/elife.56942), 2020-06-05
Supplement: supp [file Figure 6-source data for Figure 6C_Bottom.xlsx]

## Sheet: wild-type
Raw data for Figure 6C bottom
forward duration
0.167
0.211
0.257
0.259
0.303
0.303
0.317
0.347
0.349
0.363
0.363
0.38
0.394
0.409
0.409
0.423
0.455
0.469
0.47
0.485
0.485
0.5
0.514
0.514
0.516
0.516
0.53
0.576
0.591
0.605
0.621
0.622
0.635
0.635
0.635
0.636
0.636
0.637
0.637
0.666
0.666
0.68
0.682
0.696
0.697
0.743
0.757
0.758
0.758
0.786
0.786
0.788
0.803
0.847
0.847
0.848
0.849
0.849
0.849
0.863
0.877
0.878
0.891
0.893
0.893
0.894
0.909
0.939
0.983
0.985
0.999
0.999
1
1.014
1.015
1.029
1.029
1.059
1.061
1.073
1.075
1.075
1.085
1.089
1.089
1.09
1.105
1.121
1.121
1.121
1.134
1.135
1.15
1.152
1.165
1.165
1.166
1.18
1.18
1.182
1.182
1.195
1.196
1.197
1.211
1.211
1.211
1.212
1.226
1.226
1.226
1.226
1.24
1.241
1.242
1.242
1.257
1.257
1.27
1.272
1.272
1.275
1.286
1.286
1.288
1.301
1.301
1.332
1.332
1.334
1.347
1.347
1.347
1.377
1.377
1.378
1.393
1.407
1.423
1.424
1.438
1.453
1.454
1.455
1.467
1.482
1.483
1.484
1.484
1.485
1.497
1.499
1.5
1.5
1.5
1.514
1.529
1.529
1.529
1.544
1.544
1.545
1.559
1.559
1.56
1.561
1.574
1.578
1.589
1.589
1.605
1.605
1.618
1.62
1.62
1.62
1.621
1.634
1.634
1.635
1.635
1.635
1.635
1.649
1.649
1.65
1.651
1.666
1.679
1.681
1.683
1.694
1.696
1.711
1.726
1.74
1.74
1.74
1.741
1.741
1.741
1.741
1.741
1.741
1.756
1.771
1.773
1.787
1.8
1.801
1.802
1.803
1.803
1.815
1.817
1.831
1.833
1.846
1.846
1.847
1.848
1.861
1.862
1.863
1.864
1.878
1.892
1.908
1.908
1.921
1.922
1.922
1.923
1.923
1.923
1.923
1.924
1.938
1.953
1.953
1.953
1.953
1.969
1.969
1.983
1.999
2.015
2.028
2.029
2.029
2.029
2.044
2.059
2.06
2.06
2.074
2.075
2.075
2.079
2.09
2.091
2.104
2.106
2.12
2.12
2.135
2.135
2.135
2.149
2.15
2.164
2.179
2.18
2.21
2.211
2.211
2.211
2.212
2.224
2.224
2.24
2.241
2.242
2.255
2.256
2.256
2.271
2.271
2.272
2.284
2.285
2.286
2.286
2.302
2.302
2.303
2.331
2.333
2.346
2.347
2.377
2.377
2.377
2.391
2.392
2.393
2.421
2.422
2.422
2.422
2.423
2.424
2.437
2.452
2.452
2.454
2.474
2.488
2.497
2.497
2.514
2.529
2.543
2.544
2.546
2.558
2.56
2.574
2.575
2.589
2.604
2.605
2.618
2.62
2.621
2.633
2.634
2.636
2.649
2.649
2.649
2.663
2.665
2.666
2.68
2.694
2.695
2.709
2.71
2.724
2.726
2.761
2.786
2.786
2.786
2.8
2.815
2.817
2.831
2.832
2.846
2.846
2.846
2.861
2.861
2.876
2.877
2.886
2.89
2.891
2.892
2.892
2.907
2.952
2.952
2.959
2.966
2.967
2.969
2.982
2.984
2.998
2.999
3.013
3.014
3.014
3.029
3.029
3.029
3.044
3.045
3.057
3.058
3.058
3.059
3.079
3.087
3.089
3.103
3.103
3.12
3.134
3.164
3.17
3.178
3.178
3.179
3.179
3.18
3.2
3.21
3.225
3.225
3.24
3.24
3.255
3.256
3.256
3.269
3.27
3.299
3.3
3.3
3.301
3.314
3.316
3.331
3.331
3.346
3.361
3.376
3.378
3.406
3.406
3.407
3.408
3.408
3.43
3.441
3.453
3.467
3.482
3.496
3.496
3.497
3.514
3.526
3.538
3.543
3.544
3.572
3.572
3.587
3.603
3.603
3.617
3.634
3.635
3.649
3.65
3.653
3.68
3.681
3.709
3.709
3.709
3.754
3.754
3.768
3.769
3.781
3.783
3.815
3.83
3.831
3.845
3.846
3.861
3.863
3.875
3.889
3.905
3.906
3.907
3.907
3.98
3.981
3.997
4.01
4.011
4.012
4.012
4.012
4.042
4.056
4.072
4.086
4.088
4.089
4.102
4.103
4.117
4.117
4.117
4.118
4.118
4.133
4.133
4.134
4.162
4.164
4.164
4.193
4.194
4.207
4.225
4.238
4.239
4.253
4.269
4.27
4.27
4.271
4.284
4.284
4.285
4.286
4.3
4.3
4.302
4.302
4.315
4.316
4.328
4.343
4.345
4.35
4.359
4.359
4.36
4.376
4.377
4.396
4.405
4.406
4.419
4.42
4.435
4.436
4.45
4.466
4.482
4.482
4.496
4.497
4.51
4.511
4.512
4.512
4.512
4.541
4.556
4.557
4.56
4.572
4.586
4.587
4.588
4.588
4.589
4.589
4.607
4.618
4.618
4.633
4.634
4.649
4.663
4.678
4.678
4.709
4.722
4.724
4.724
4.724
4.753
4.769
4.783
4.786
4.786
4.798
4.799
4.819
4.819
4.829
4.859
4.861
4.878
4.905
4.905
4.919
4.92
4.92
4.921
4.935
4.935
4.935
4.95
4.95
4.972
4.983
4.995
4.995
4.996
5.01
5.012
5.012
5.026
5.055
5.055
5.073
5.085
5.101
5.102
5.103
5.116
5.117
5.117
5.154
5.162
5.166
5.178
5.178
5.194
5.207
5.23
5.237
5.239
5.243
5.253
5.253
5.268
5.274
5.284
5.298
5.318
5.328
5.344
5.388
5.406
5.409
5.45
5.464
5.495
5.496
5.509
5.512
5.54
5.556
5.571
5.571
5.587
5.601
5.617
5.632
5.632
5.646
5.662
5.663
5.678
5.678
5.692
5.693
5.707
5.709
5.723
5.738
5.738
5.738
5.753
5.783
5.783
5.798
5.798
5.798
5.803
5.812
5.813
5.827
5.83
5.843
5.857
5.859
5.873
5.889
5.906
5.909
5.95
5.95
5.952
5.964
5.98
5.98
5.981
5.995
5.995
5.995
6.016
6.024
6.025
6.04
6.057
6.062
6.07
6.085
6.086
6.1
6.116
6.118
6.137
6.145
6.148
6.148
6.152
6.161
6.167
6.177
6.192
6.218
6.223
6.239
6.243
6.266
6.267
6.282
6.282
6.284
6.297
6.298
6.298
6.298
6.314
6.33
6.333
6.338
6.375
6.375
6.39
6.404
6.404
6.409
6.423
6.434
6.435
6.449
6.449
6.451
6.451
6.466
6.48
6.495
6.496
6.509
6.525
6.556
6.57
6.57
6.575
6.601
6.616
6.647
6.648
6.66
6.68
6.692
6.707
6.741
6.751
6.767
6.798
6.812
6.875
6.884
6.89
6.903
6.904
6.917
6.934
6.947
6.95
6.963
6.968
6.985
6.994
6.994
6.994
6.995
6.995
7.01
7.024
7.026
7.054
7.069
7.086
7.099
7.101
7.117
7.131
7.135
7.146
7.148
7.161
7.191
7.191
7.206
7.206
7.238
7.252
7.266
7.28
7.282
7.298
7.302
7.311
7.311
7.328
7.341
7.342
7.358
7.358
7.373
7.374
7.389
7.395
7.401
7.433
7.433
7.434
7.479
7.493
7.494
7.509
7.514
7.538
7.553
7.554
7.584
7.585
7.606
7.614
7.616
7.646
7.705
7.705
7.706
7.721
7.723
7.736
7.736
7.787
7.797
7.813
7.84
7.842
7.887
7.903
7.918
7.918
7.964
7.964
7.978
7.979
8.008
8.01
8.024
8.024
8.054
8.058
8.089
8.101
8.114
8.129
8.159
8.165
8.175
8.176
8.191
8.191
8.207
8.221
8.221
8.236
8.251
8.295
8.311
8.312
8.327
8.344
8.356
8.372
8.387
8.401
8.416
8.418
8.418
8.462
8.464
8.478
8.514
8.524
8.554
8.568
8.579
8.584
8.585
8.614
8.63
8.645
8.674
8.676
8.704
8.706
8.721
8.75
8.764
8.767
8.78
8.781
8.796
8.81
8.816
8.826
8.826
8.842
8.843
8.857
8.873
8.878
8.901
8.901
8.948
8.964
8.988
9.009
9.053
9.054
9.059
9.114
9.115
9.175
9.189
9.206
9.207
9.218
9.236
9.248
9.25
9.25
9.265
9.284
9.307
9.31
9.327
9.356
9.37
9.37
9.385
9.416
9.432
9.433
9.491
9.538
9.569
9.583
9.629
9.644
9.66
9.693
9.706
9.749
9.764
9.765
9.781
9.794
9.856
9.887
9.901
9.917
9.931
9.962
10.026
10.084
10.084
10.127
10.144
10.159
10.275
10.324
10.325
10.325
10.325
10.355
10.375
10.386
10.417
10.447
10.462
10.487
10.506
10.527
10.574
10.577
10.597
10.626
10.628
10.659
10.749
10.763
10.781
10.794
10.794
10.871
10.886
10.902
10.915
10.916
10.916
10.951
10.961
11.006
11.022
11.036
11.037
11.066
11.067
11.172
11.218
11.279
11.341
11.37
11.461
11.463
11.475
11.476
11.52
11.581
11.596
11.599
11.626
11.687
11.719
11.719
11.734
11.735
11.764
11.778
11.899
11.914
12.005
12.022
12.036
12.037
12.05
12.051
12.052
12.156
12.157
12.173
12.187
12.188
12.248
12.292
12.307
12.369
12.461
12.565
12.581
12.641
12.732
12.747
12.749
12.798
12.899
13.006
13.036
13.248
13.262
13.328
13.369
13.385
13.428
13.49
13.503
13.54
13.615
13.626
13.798
13.801
13.822
13.822
13.913
13.914
13.93
13.958
14.039
14.17
14.252
14.291
14.321
14.337
14.404
14.444
14.474
14.484
14.639
14.746
14.807
14.868
14.873
14.897
14.956
14.957
14.973
14.988
14.99
15.019
15.094
15.187
15.307
15.341
15.426
15.473
15.519
15.538
15.568
15.643
15.659
15.745
15.836
15.88
15.986
16.062
16.351
16.492
16.562
16.578
16.639
16.795
16.897
16.986
17.094
17.173
17.184
17.259
17.264
17.386
17.394
17.607
17.79
18.051
18.173
18.293
18.398
18.618
18.881
18.985
19.02
19.378
19.534
19.586
19.591
19.698
19.741
19.986
20.448
20.455
20.776
20.953
21.014
21.196
21.205
21.317
21.454
21.513
21.942
21.987
22.2
22.693
22.936
23.174
23.194
23.255
23.259
23.527
24.207
24.346
24.39
24.419
24.434
24.466
24.481
24.517
24.995
25.01
25.346
25.759
25.782
26.419
26.426
26.465
26.538
26.918
27.265
27.373
27.615
28.033
28.387
28.478
28.557
29.869
30.067
30.466
30.673
30.974
31.212
32.287
32.864
33.04
33.423
34.175
35.085
35.371
35.638
35.685
36.335
36.991
41.108
42.079
44.058
47.37
48.856
54.23
62.637
65.645
68.175
79.701
