# Supplementary material for: Flexible motor sequence generation during stereotyped escape responses
Source: eLife journal article supplement (doi:10.7554/elife.56942), 2020-06-05
Supplement: supp [file Figure 6-source data for Figure 6C_Upper.xlsx]

## Sheet: Pmec-4  ChR2;Plim-4  miniSOG
Raw data for Figure 6C(upper)
worm name	reversal duration_yaml	turn
20170630w1	8.564	0
	2.341	0
	8.783	0
W3	7.166	0.5
	3.836	0
	4.359	0.5
	4.854	0
	11.587	0
W4	1.797	0
	4.991	0
	8.65	0.5
	9.77	0.5
	2.988	0
	6.49	0
W8	6.399	0
	7.656	0
	1.435	0
w9	4.219	0
	1.515	0
	6.276	1
	4.427	0
	8.12	0
	11.985	0.5
	4.702	0
w10	11.789	0
	6.541	0
	2.361	0
	6.258	0
	3.26	0
	7.01	0
w11	4.723	0
w12	13.514	0.5
	12.395	0.5
	14.897	0
	2.219	0
	4.684	0
	10.461	0
w13	17.234	0
	3.771	0
20170705w1	0.546	0
	0.564	0
	2.565	0
	2.654	0.5
W2	4.764	0.5
	0.787	0
W3	6.353	0.5
	5.551	0.5
	2.766	0
	1.09	0
	3.311	0
	4.511	0
	9.064	0.5
	4.198	0
W4	2.684	0
	4.69	0.5
	10.341	1
	1.898	0
	1.757	0
	0.867	0
W6	4.057	0
	8.745	0
W6	3.108	0
	4.521	0
	4.365	0
	9.821	1
	4.2	0
	10.375	0
	3.433	0
	4.722	0
	4.945	0
	6.401	0
	2.079	0
	2.059	0
	2.178	0
	3.794	0
	5.692	0
	4.32	0
W7	4.159	0
	3.938	0
W8	4.806	0
	3.774	0
	4.503	0
	4.824	0
	2.221	0
	3.23	0
	3.987	0
	1.297	0
W9	1.837	0
	1.756	0
	4.905	0
	7.106	0
	2.302	0
W10	0.323	0
	4.907	0
	8.589	0
	3.986	0
	5.289	0
	4.098	0
W11	4.744	0.5
	3.25	0.5
	4.022	0.5
	9.693	0.5
	6.627	1
	13.091	1
	10.053	0.5
	4.461	0
	5.278	0
	4.299	0
W12	2.987	0
	2.871	0
	9.207	0
	3.351	0
	6.468	0.5
	3.208	0
	6.117	0
	6.652	1
	1.393	0
	8.948	0
	3.947	0
W13	2.846	0
	4.708	0
	5.933	0
	6.158	0.5
	3.45	0
	7.65	0.5
	7.996	0.5
	5.611	0
	2.437	0
W14	2.085	1
	2.059	0
	4.522	1
W16	30.089	0.5
	28.89	0.5
20170926w1	6.681	0.5
	5.192	0.5
	9.78	0.5
	8.841	0
	15.403	0
	0.464	0
	3.068	0
	0.223	0
	17.346	0.5
w3	3.553	0
	4.38	0
	4.179	0
	6.607	0.5
	4.21	0
	5.533	0.5
	5.228	0.5
	0.445	0
	7.308	0
	6.298	0
	1.292	0
	0.707	0
w4	6.743	0
	8.317	0
	6.5	0
	7.348	0.5
	8.419	0
	6.358	0
	10.682	0.5
	7.227	0.5
	1.19	0
	15.484	0
	7.691	0
w5	3.452	0
	4.85	0.5
	4.143	0
	2.543	0
	4.098	0
	9.911	0
	4.3	0.5
	12.526	0.5
	14.554	0
	12.818	0
	7.79	0
	10.779	0.5
	10.986	0.5
	1.455	0
	1.433	0
	6.746	0
w6	11.102	0
	9.65	0
	1.494	0
	1.493	0
	9.935	0
	9.265	0.5
	0.343	0
	9.977	0.5
w7	4.018	0
	6.074	0
	3.619	0
	1.823	0
	1.453	1
	6.944	0
	20.272	0.5
	1.856	0
	12.057	0.5
	2.161	0
	23.577	0.5
	0.404	0
	1.492	0
	1.433	0
	1.635	0
w8	5.086	0
	8.803	0.5
	14.404	0.5
	12.798	0.5
	7.428	0.5
	9.165	0
	13.705	0.5
w9	11.143	0
	10.805	0
	13.879	0
	17.492	0
	28.795	0
	21.786	0
	18.137	0
	1.796	0
	1.716	0
	1.354	0
w10	8.538	0
	10.051	0
	14.947	0
	12.021	0
	16.33	0
	20.63	0.5
	25.969	0.5
	29.738	0.5
w13	3.351	0
	2.947	0
	5.954	0.5
	4.572	0.5
	2.079	0
	0.363	0
	1.323	0
	0.485	0
