# Supplementary figures and images for: Flexible motor sequence generation during stereotyped escape responses
Source: eLife journal article supplement (doi:10.7554/elife.56942), 2020-06-05

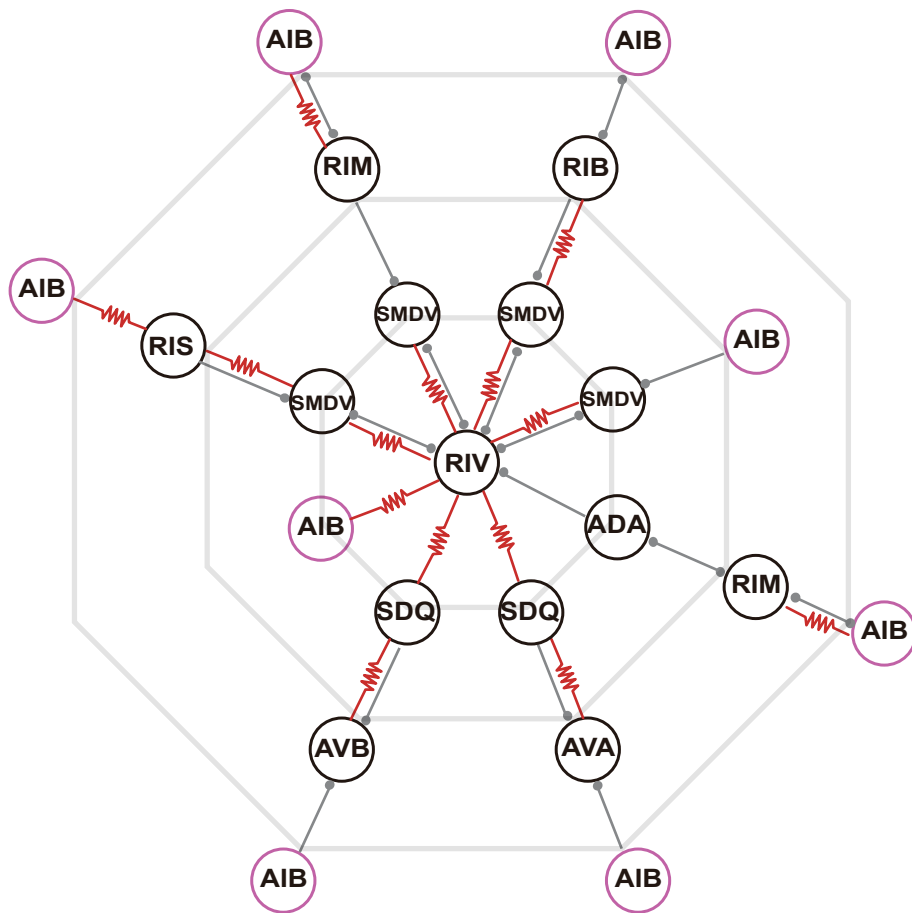

— gap junction  
— chemical synapse

Supplement: supp [file elife-56942-supp-v1.zip]

**A** AIB::Chrimson; RIB::GluSnFR,  $n=25$

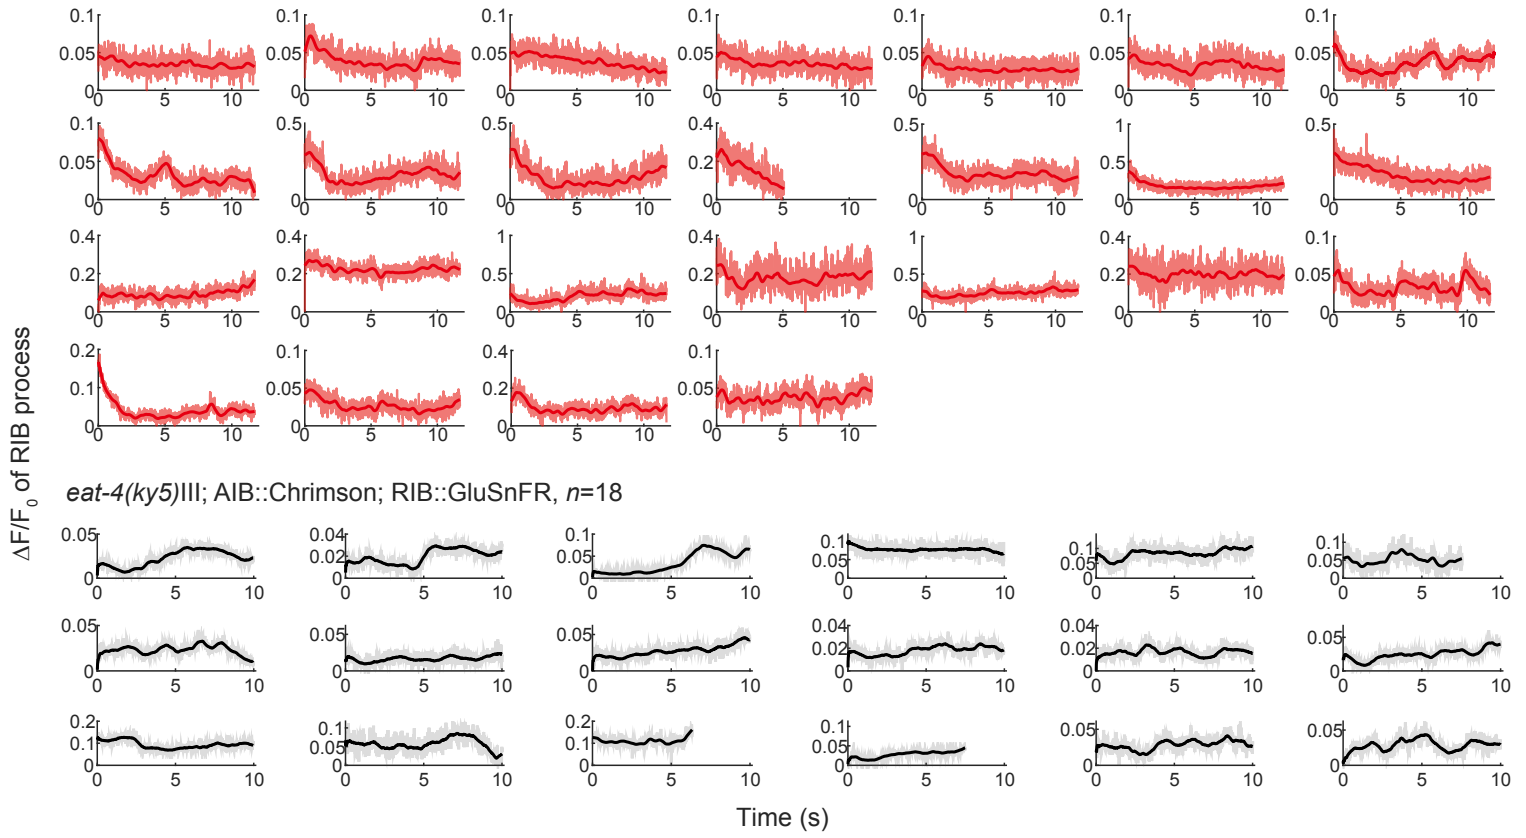

**B** AIB::Chrimson; AIB::GCaMP6,  $n=21$

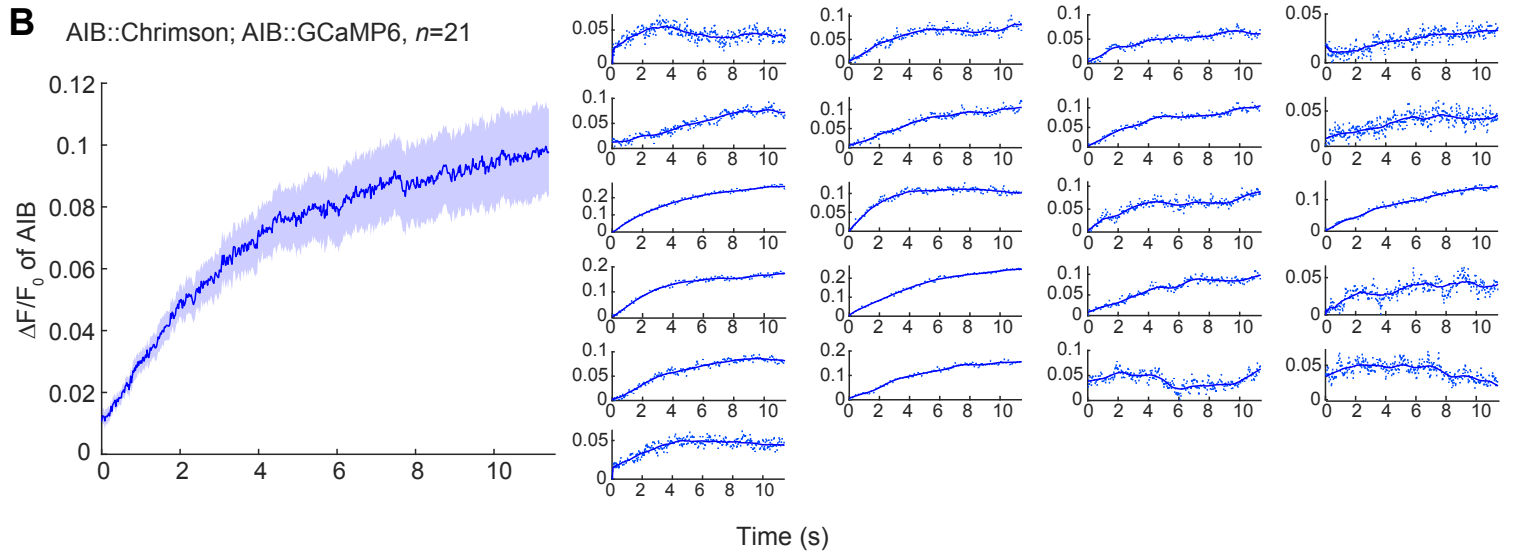

Supplement: supp [file elife-56942-supp-v1.zip]

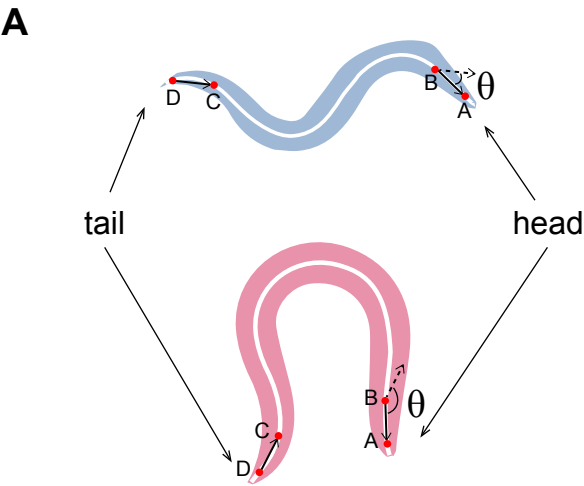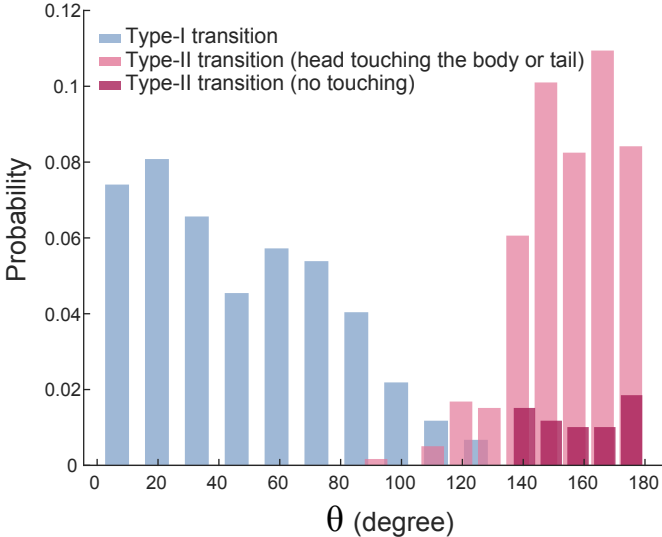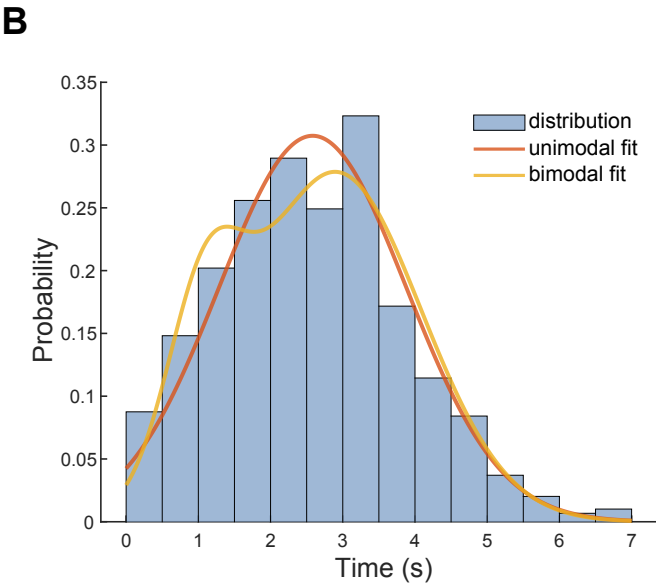

| Model                   | Unimodal   | Bimodal |
|-------------------------|------------|---------|
| Negative log likelihood | 997.23     | 986.02  |
| P-value                 | 5.3435e-05 |         |

Supplement: supp [file elife-56942-supp-v1.zip]

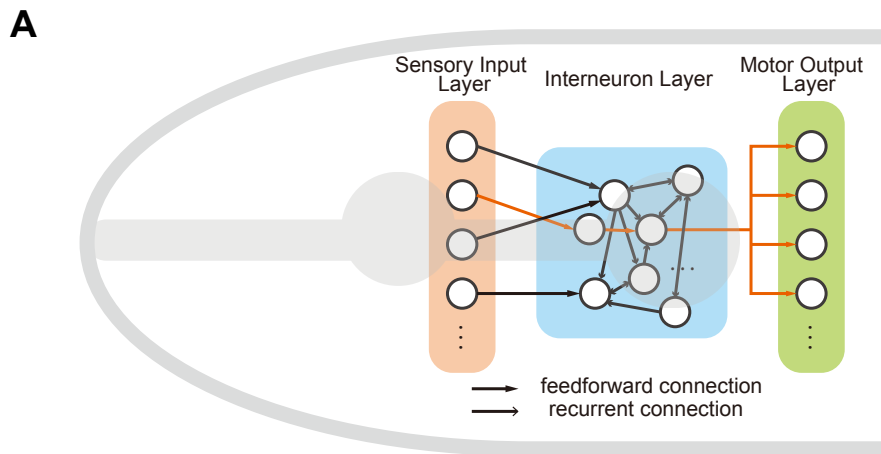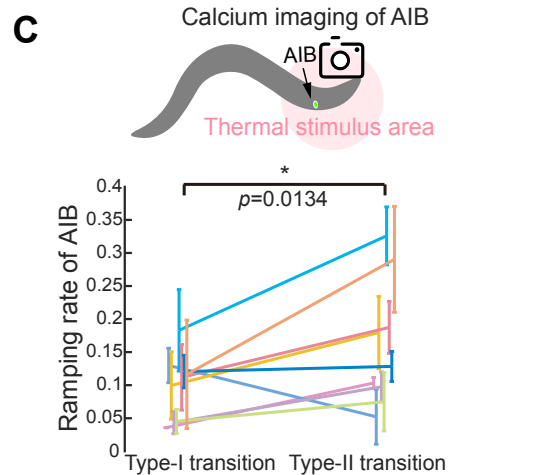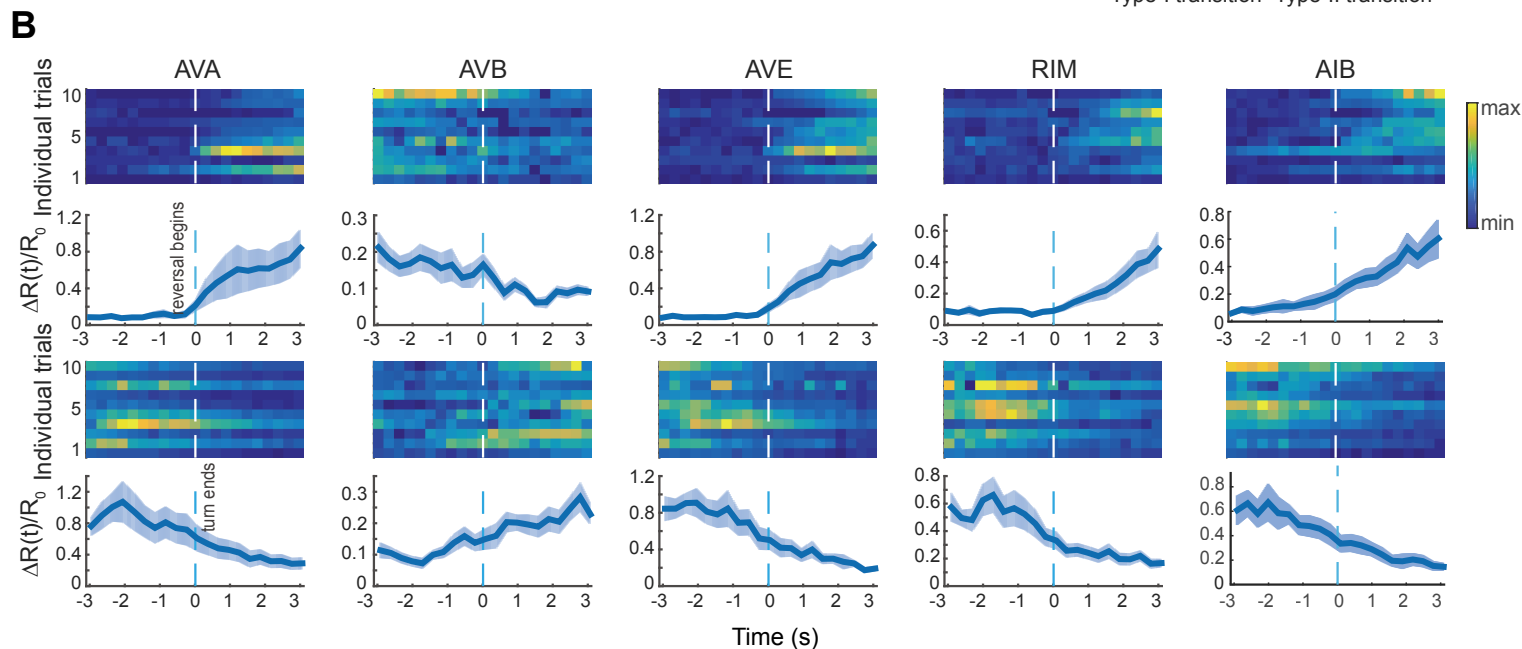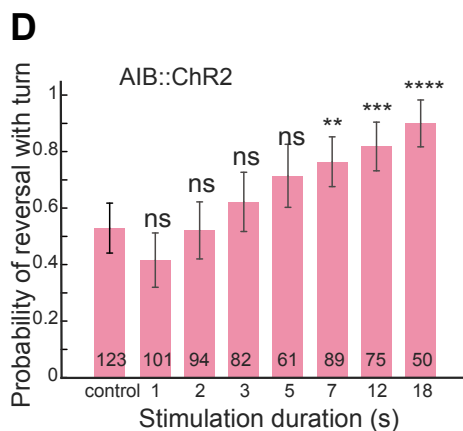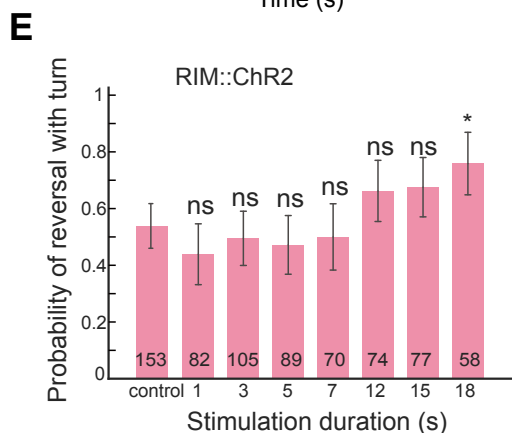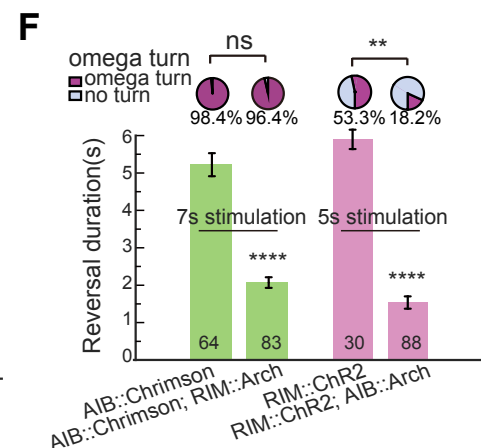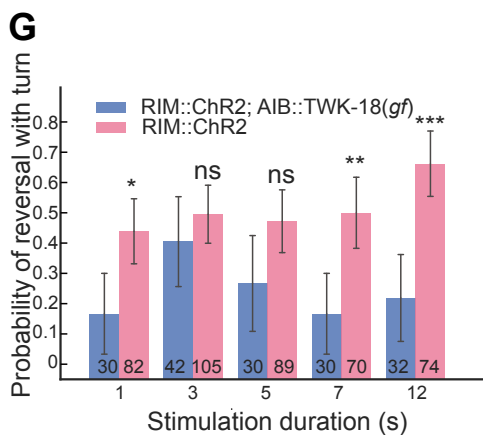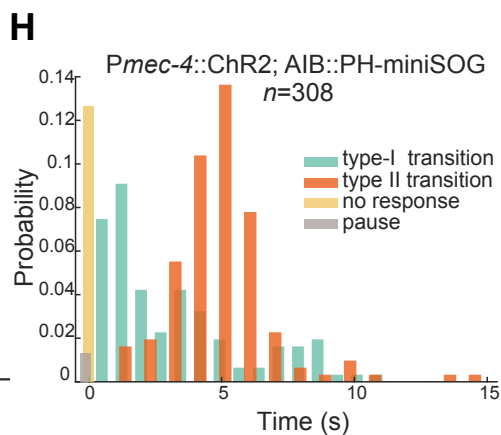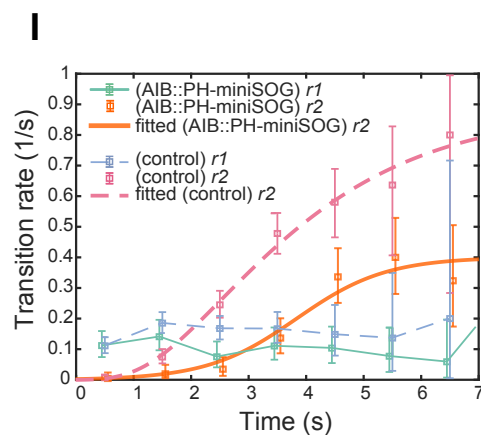

Supplement: supp [file elife-56942-supp-v1.zip]

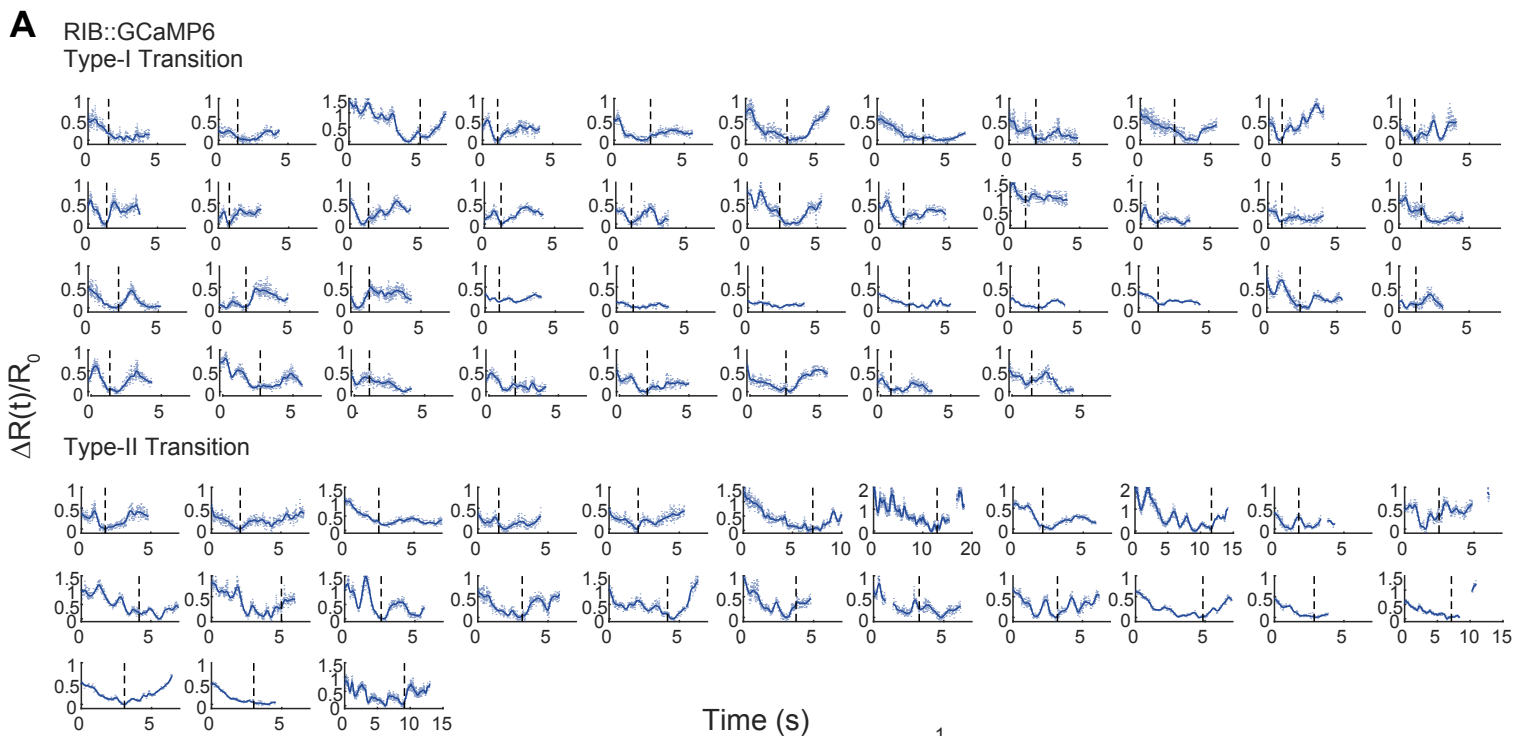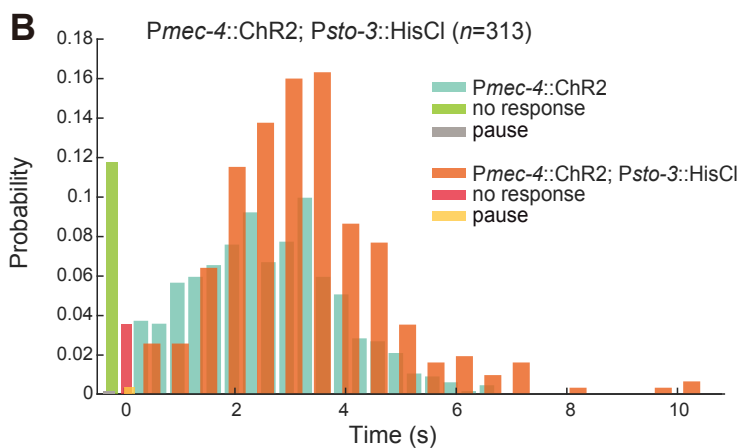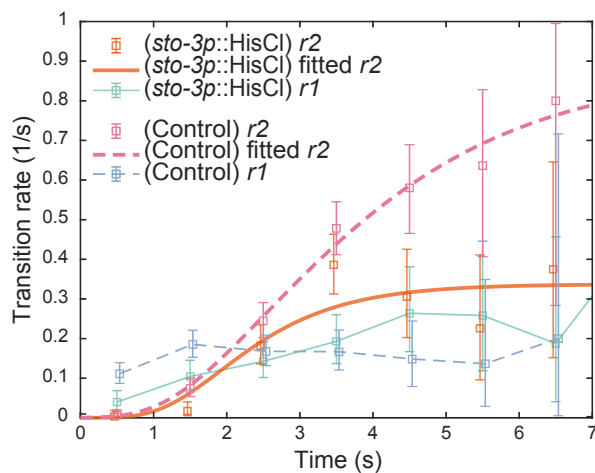

**C** AIB::Chrimson; *Plim-4::GCaMP6*; RIB::miniSOG (freely moving)

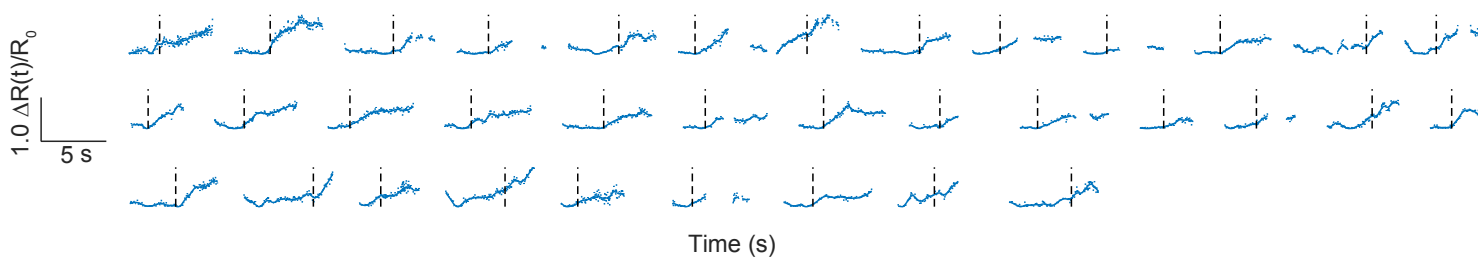

**D** AIB::Chrimson; *Plim-4::GCaMP6* (freely moving)

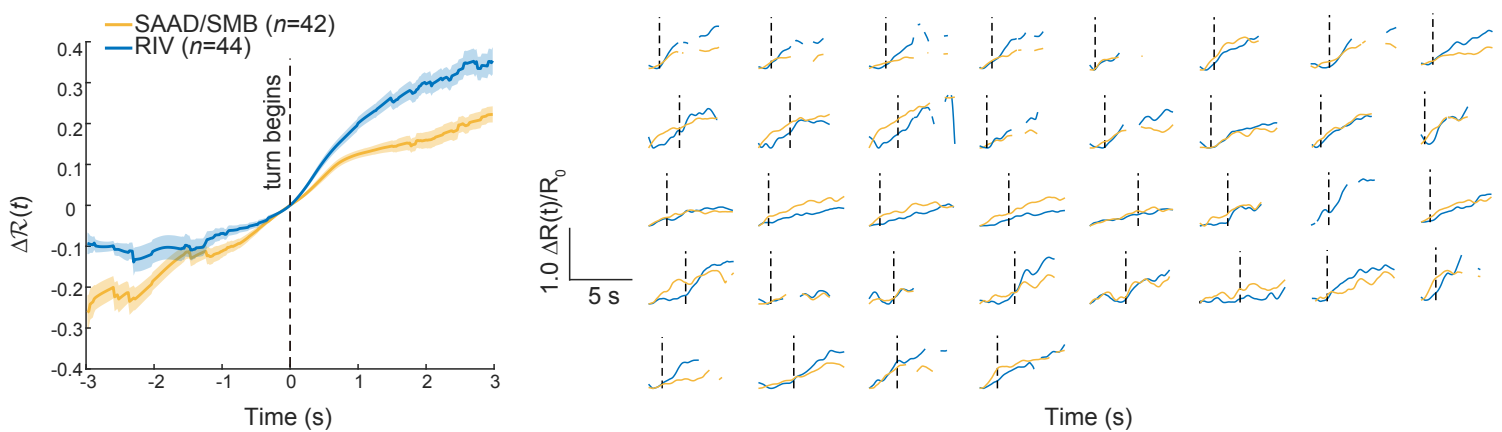

Supplement: supp [file elife-56942-supp-v1.zip]
